# Supplementary material for: Machine learning identifies exosome features related to hepatocellular carcinoma
Source: Frontiers journal article supplement (doi:10.3389/fcell.2022.1020415), 2022-09-19
Supplement: Data_Sheet_1.ZIP [file Data_Sheet_1.ZIP]

GO ID	Description	out (411)	All (17743)	pvalue	p.adjust	Genes
GO:0000070	mitotic sister chromatid segregation	30	185	3.76577310202498e-17	2.08247252541981e-13	ENSG00000013810;ENSG00000071539;ENSG00000080986;ENSG00000090889;ENSG00000094804;ENSG00000109805;ENSG00000112742;ENSG00000117399;ENSG00000117650;ENSG00000117724;ENSG00000121152;ENSG00000126787;ENSG00000134057;ENSG00000134690;ENSG00000137807;ENSG00000142945;ENSG00000143228;ENSG00000146670;ENSG00000156970;ENSG00000161800;ENSG00000164109;ENSG00000164611;ENSG00000166851;ENSG00000167513;ENSG00000169679…
GO:0140014	mitotic nuclear division	37	311	2.67527103540722e-16	5.54487121926853e-13	ENSG00000011426;ENSG00000013810;ENSG00000071539;ENSG00000080986;ENSG00000088325;ENSG00000090889;ENSG00000094804;ENSG00000099812;ENSG00000101057;ENSG00000109805;ENSG00000112742;ENSG00000117399;ENSG00000117650;ENSG00000117724;ENSG00000121152;ENSG00000126787;ENSG00000134057;ENSG00000134690;ENSG00000137807;ENSG00000138160;ENSG00000142945;ENSG00000143228;ENSG00000146670;ENSG00000148773;ENSG00000156970…
GO:0000819	sister chromatid segregation	31	214	3.00806756922343e-16	5.54487121926853e-13	ENSG00000013810;ENSG00000071539;ENSG00000080986;ENSG00000090889;ENSG00000094804;ENSG00000109805;ENSG00000112742;ENSG00000117399;ENSG00000117650;ENSG00000117724;ENSG00000121152;ENSG00000126787;ENSG00000131747;ENSG00000134057;ENSG00000134690;ENSG00000137807;ENSG00000142945;ENSG00000143228;ENSG00000146670;ENSG00000156970;ENSG00000161800;ENSG00000164109;ENSG00000164611;ENSG00000166851;ENSG00000167513…
GO:0051983	regulation of chromosome segregation	23	110	6.12887520762611e-16	8.4731699745431e-13	ENSG00000013810;ENSG00000071539;ENSG00000080986;ENSG00000094804;ENSG00000112742;ENSG00000114346;ENSG00000117399;ENSG00000117650;ENSG00000117724;ENSG00000126787;ENSG00000134057;ENSG00000142945;ENSG00000146670;ENSG00000148773;ENSG00000156970;ENSG00000161800;ENSG00000164109;ENSG00000164611;ENSG00000166851;ENSG00000167513;ENSG00000169679;ENSG00000175063;ENSG00000178999
GO:0007052	mitotic spindle organization	29	194	1.20171975978974e-15	1.32910205432745e-12	ENSG00000013810;ENSG00000080986;ENSG00000088325;ENSG00000089685;ENSG00000090889;ENSG00000099812;ENSG00000100162;ENSG00000101057;ENSG00000112742;ENSG00000115163;ENSG00000117399;ENSG00000117650;ENSG00000117724;ENSG00000126787;ENSG00000134057;ENSG00000134690;ENSG00000137807;ENSG00000138160;ENSG00000142945;ENSG00000143228;ENSG00000152253;ENSG00000154839;ENSG00000156970;ENSG00000161800;ENSG00000164109…
GO:0007059	chromosome segregation	38	353	2.87087659217499e-15	2.64599125912128e-12	ENSG00000013810;ENSG00000071539;ENSG00000080986;ENSG00000089685;ENSG00000090889;ENSG00000094804;ENSG00000105173;ENSG00000109805;ENSG00000112742;ENSG00000114346;ENSG00000117399;ENSG00000117650;ENSG00000117724;ENSG00000121152;ENSG00000123485;ENSG00000126787;ENSG00000131747;ENSG00000134057;ENSG00000134690;ENSG00000137807;ENSG00000142945;ENSG00000143228;ENSG00000146670;ENSG00000148773;ENSG00000152253…
GO:1902850	microtubule cytoskeleton organization involved in mitosis	29	214	1.68069966213672e-14	1.32775273308801e-11	ENSG00000013810;ENSG00000080986;ENSG00000088325;ENSG00000089685;ENSG00000090889;ENSG00000099812;ENSG00000100162;ENSG00000101057;ENSG00000112742;ENSG00000115163;ENSG00000117399;ENSG00000117650;ENSG00000117724;ENSG00000126787;ENSG00000134057;ENSG00000134690;ENSG00000137807;ENSG00000138160;ENSG00000142945;ENSG00000143228;ENSG00000152253;ENSG00000154839;ENSG00000156970;ENSG00000161800;ENSG00000164109…
GO:0051301	cell division	50	629	2.2447557319592e-14	1.5516873997168e-11	ENSG00000011426;ENSG00000013810;ENSG00000080986;ENSG00000088325;ENSG00000089685;ENSG00000090889;ENSG00000094804;ENSG00000099812;ENSG00000105173;ENSG00000105894;ENSG00000109805;ENSG00000112984;ENSG00000114346;ENSG00000115163;ENSG00000117399;ENSG00000117650;ENSG00000117724;ENSG00000121152;ENSG00000131747;ENSG00000134057;ENSG00000134690;ENSG00000137807;ENSG00000138160;ENSG00000138180;ENSG00000142945…
GO:0000280	nuclear division	42	462	3.52907221871194e-14	2.1081874997279e-11	ENSG00000011426;ENSG00000013810;ENSG00000051180;ENSG00000071539;ENSG00000080986;ENSG00000088325;ENSG00000090889;ENSG00000094804;ENSG00000099812;ENSG00000101057;ENSG00000105173;ENSG00000109805;ENSG00000112742;ENSG00000117399;ENSG00000117650;ENSG00000117724;ENSG00000121152;ENSG00000126787;ENSG00000128342;ENSG00000131747;ENSG00000134057;ENSG00000134690;ENSG00000137807;ENSG00000138160;ENSG00000142945…
GO:1903047	mitotic cell cycle process	62	927	3.81227395972495e-14	2.1081874997279e-11	ENSG00000006611;ENSG00000011426;ENSG00000013810;ENSG00000051180;ENSG00000071539;ENSG00000075218;ENSG00000080986;ENSG00000085840;ENSG00000088325;ENSG00000089685;ENSG00000090889;ENSG00000093009;ENSG00000094804;ENSG00000099812;ENSG00000100162;ENSG00000101003;ENSG00000101057;ENSG00000105173;ENSG00000109805;ENSG00000111206;ENSG00000112742;ENSG00000112984;ENSG00000114346;ENSG00000115163;ENSG00000117399…
GO:0010965	regulation of mitotic sister chromatid separation	17	63	4.37940451722362e-14	2.20164608911333e-11	ENSG00000013810;ENSG00000071539;ENSG00000080986;ENSG00000094804;ENSG00000112742;ENSG00000117399;ENSG00000117724;ENSG00000126787;ENSG00000134057;ENSG00000156970;ENSG00000164109;ENSG00000164611;ENSG00000166851;ENSG00000167513;ENSG00000169679;ENSG00000175063;ENSG00000178999
GO:0098813	nuclear chromosome segregation	33	293	5.7390201869878e-14	2.64473180283688e-11	ENSG00000013810;ENSG00000071539;ENSG00000080986;ENSG00000090889;ENSG00000094804;ENSG00000105173;ENSG00000109805;ENSG00000112742;ENSG00000114346;ENSG00000117399;ENSG00000117650;ENSG00000117724;ENSG00000121152;ENSG00000126787;ENSG00000131747;ENSG00000134057;ENSG00000134690;ENSG00000137807;ENSG00000142945;ENSG00000143228;ENSG00000146670;ENSG00000156970;ENSG00000161800;ENSG00000164109;ENSG00000164611…
GO:0051306	mitotic sister chromatid separation	17	65	7.74026369872174e-14	3.29258909645625e-11	ENSG00000013810;ENSG00000071539;ENSG00000080986;ENSG00000094804;ENSG00000112742;ENSG00000117399;ENSG00000117724;ENSG00000126787;ENSG00000134057;ENSG00000156970;ENSG00000164109;ENSG00000164611;ENSG00000166851;ENSG00000167513;ENSG00000169679;ENSG00000175063;ENSG00000178999
GO:0048285	organelle fission	43	509	2.1812376294963e-13	8.6158886365104e-11	ENSG00000011426;ENSG00000013810;ENSG00000051180;ENSG00000071539;ENSG00000080986;ENSG00000088325;ENSG00000090889;ENSG00000094804;ENSG00000099812;ENSG00000101057;ENSG00000105173;ENSG00000109805;ENSG00000112742;ENSG00000117399;ENSG00000117650;ENSG00000117724;ENSG00000121152;ENSG00000126787;ENSG00000128342;ENSG00000131747;ENSG00000134057;ENSG00000134690;ENSG00000137807;ENSG00000138160;ENSG00000142945…
GO:0000278	mitotic cell cycle	66	1073	2.61148347862119e-13	9.55181792649902e-11	ENSG00000006611;ENSG00000011426;ENSG00000013810;ENSG00000051180;ENSG00000054598;ENSG00000071539;ENSG00000075218;ENSG00000080986;ENSG00000085840;ENSG00000088325;ENSG00000089685;ENSG00000090889;ENSG00000093009;ENSG00000094804;ENSG00000099812;ENSG00000100162;ENSG00000101003;ENSG00000101057;ENSG00000105173;ENSG00000109805;ENSG00000111206;ENSG00000112742;ENSG00000112984;ENSG00000114346;ENSG00000115163…
GO:1905818	regulation of chromosome separation	17	70	2.93619287288414e-13	9.55181792649902e-11	ENSG00000013810;ENSG00000071539;ENSG00000080986;ENSG00000094804;ENSG00000112742;ENSG00000117399;ENSG00000117724;ENSG00000126787;ENSG00000134057;ENSG00000156970;ENSG00000164109;ENSG00000164611;ENSG00000166851;ENSG00000167513;ENSG00000169679;ENSG00000175063;ENSG00000178999
GO:0007051	spindle organization	30	256	2.93636355787493e-13	9.55181792649902e-11	ENSG00000013810;ENSG00000080986;ENSG00000088325;ENSG00000089685;ENSG00000090889;ENSG00000099812;ENSG00000100162;ENSG00000101057;ENSG00000112742;ENSG00000115163;ENSG00000117399;ENSG00000117650;ENSG00000117724;ENSG00000126787;ENSG00000134057;ENSG00000134690;ENSG00000137807;ENSG00000138160;ENSG00000142945;ENSG00000143228;ENSG00000152253;ENSG00000154839;ENSG00000156970;ENSG00000157456;ENSG00000161800…
GO:0007091	metaphase/anaphase transition of mitotic cell cycle	16	61	4.02371357097209e-13	1.23617422485976e-10	ENSG00000013810;ENSG00000071539;ENSG00000080986;ENSG00000094804;ENSG00000112742;ENSG00000117399;ENSG00000117724;ENSG00000126787;ENSG00000134057;ENSG00000156970;ENSG00000164109;ENSG00000166851;ENSG00000167513;ENSG00000169679;ENSG00000175063;ENSG00000178999
GO:0033047	regulation of mitotic sister chromatid segregation	17	74	7.85759887694948e-13	2.28697483102793e-10	ENSG00000013810;ENSG00000071539;ENSG00000080986;ENSG00000094804;ENSG00000112742;ENSG00000117399;ENSG00000117724;ENSG00000126787;ENSG00000134057;ENSG00000156970;ENSG00000164109;ENSG00000164611;ENSG00000166851;ENSG00000167513;ENSG00000169679;ENSG00000175063;ENSG00000178999
GO:0044784	metaphase/anaphase transition of cell cycle	16	64	9.09621195397621e-13	2.51510260527442e-10	ENSG00000013810;ENSG00000071539;ENSG00000080986;ENSG00000094804;ENSG00000112742;ENSG00000117399;ENSG00000117724;ENSG00000126787;ENSG00000134057;ENSG00000156970;ENSG00000164109;ENSG00000166851;ENSG00000167513;ENSG00000169679;ENSG00000175063;ENSG00000178999
GO:0033045	regulation of sister chromatid segregation	18	87	1.13400555696663e-12	2.98621463334545e-10	ENSG00000013810;ENSG00000071539;ENSG00000080986;ENSG00000094804;ENSG00000112742;ENSG00000117399;ENSG00000117724;ENSG00000126787;ENSG00000134057;ENSG00000146670;ENSG00000156970;ENSG00000164109;ENSG00000164611;ENSG00000166851;ENSG00000167513;ENSG00000169679;ENSG00000175063;ENSG00000178999
GO:0008283	cell proliferation	94	1938	1.749851278566e-12	4.39848980475907e-10	ENSG00000013810;ENSG00000041982;ENSG00000049130;ENSG00000051523;ENSG00000054598;ENSG00000058085;ENSG00000076864;ENSG00000077782;ENSG00000077942;ENSG00000085662;ENSG00000087245;ENSG00000087494;ENSG00000088992;ENSG00000089685;ENSG00000091136;ENSG00000094804;ENSG00000095970;ENSG00000100985;ENSG00000101003;ENSG00000102034;ENSG00000104419;ENSG00000104951;ENSG00000105173;ENSG00000105472;ENSG00000105894…
GO:0030071	regulation of mitotic metaphase/anaphase transition	15	59	3.62506811790074e-12	8.71592464869177e-10	ENSG00000071539;ENSG00000080986;ENSG00000094804;ENSG00000112742;ENSG00000117399;ENSG00000117724;ENSG00000126787;ENSG00000134057;ENSG00000156970;ENSG00000164109;ENSG00000166851;ENSG00000167513;ENSG00000169679;ENSG00000175063;ENSG00000178999
GO:0051304	chromosome separation	18	95	5.52824832639965e-12	1.27380055187459e-09	ENSG00000013810;ENSG00000071539;ENSG00000080986;ENSG00000094804;ENSG00000112742;ENSG00000117399;ENSG00000117724;ENSG00000126787;ENSG00000131747;ENSG00000134057;ENSG00000156970;ENSG00000164109;ENSG00000164611;ENSG00000166851;ENSG00000167513;ENSG00000169679;ENSG00000175063;ENSG00000178999
GO:2000816	negative regulation of mitotic sister chromatid separation	13	42	6.35350766346514e-12	1.40539589515849e-09	ENSG00000071539;ENSG00000080986;ENSG00000112742;ENSG00000117399;ENSG00000117724;ENSG00000134057;ENSG00000156970;ENSG00000164109;ENSG00000164611;ENSG00000166851;ENSG00000167513;ENSG00000169679;ENSG00000178999
GO:1902099	regulation of metaphase/anaphase transition of cell cycle	15	62	7.93581226438915e-12	1.68788622392585e-09	ENSG00000071539;ENSG00000080986;ENSG00000094804;ENSG00000112742;ENSG00000117399;ENSG00000117724;ENSG00000126787;ENSG00000134057;ENSG00000156970;ENSG00000164109;ENSG00000166851;ENSG00000167513;ENSG00000169679;ENSG00000175063;ENSG00000178999
GO:1905819	negative regulation of chromosome separation	13	44	1.23933410155157e-11	2.53833984502969e-09	ENSG00000071539;ENSG00000080986;ENSG00000112742;ENSG00000117399;ENSG00000117724;ENSG00000134057;ENSG00000156970;ENSG00000164109;ENSG00000164611;ENSG00000166851;ENSG00000167513;ENSG00000169679;ENSG00000178999
GO:0033048	negative regulation of mitotic sister chromatid segregation	13	45	1.70655455750924e-11	3.37044525108075e-09	ENSG00000071539;ENSG00000080986;ENSG00000112742;ENSG00000117399;ENSG00000117724;ENSG00000134057;ENSG00000156970;ENSG00000164109;ENSG00000164611;ENSG00000166851;ENSG00000167513;ENSG00000169679;ENSG00000178999
GO:0007088	regulation of mitotic nuclear division	23	176	1.97490804770959e-11	3.76594534614966e-09	ENSG00000011426;ENSG00000013810;ENSG00000071539;ENSG00000080986;ENSG00000094804;ENSG00000112742;ENSG00000117399;ENSG00000117650;ENSG00000117724;ENSG00000126787;ENSG00000134057;ENSG00000138160;ENSG00000146670;ENSG00000148773;ENSG00000156970;ENSG00000164109;ENSG00000164611;ENSG00000166851;ENSG00000167513;ENSG00000169679;ENSG00000175063;ENSG00000176170;ENSG00000178999
GO:0033046	negative regulation of sister chromatid segregation	13	47	3.1529953684373e-11	5.35770022831305e-09	ENSG00000071539;ENSG00000080986;ENSG00000112742;ENSG00000117399;ENSG00000117724;ENSG00000134057;ENSG00000156970;ENSG00000164109;ENSG00000164611;ENSG00000166851;ENSG00000167513;ENSG00000169679;ENSG00000178999
GO:0007094	mitotic spindle assembly checkpoint	12	38	3.19718096807108e-11	5.35770022831305e-09	ENSG00000071539;ENSG00000080986;ENSG00000112742;ENSG00000117399;ENSG00000117724;ENSG00000134057;ENSG00000156970;ENSG00000164109;ENSG00000166851;ENSG00000167513;ENSG00000169679;ENSG00000178999
GO:0071173	spindle assembly checkpoint	12	38	3.19718096807108e-11	5.35770022831305e-09	ENSG00000071539;ENSG00000080986;ENSG00000112742;ENSG00000117399;ENSG00000117724;ENSG00000134057;ENSG00000156970;ENSG00000164109;ENSG00000166851;ENSG00000167513;ENSG00000169679;ENSG00000178999
GO:0071174	mitotic spindle checkpoint	12	38	3.19718096807108e-11	5.35770022831305e-09	ENSG00000071539;ENSG00000080986;ENSG00000112742;ENSG00000117399;ENSG00000117724;ENSG00000134057;ENSG00000156970;ENSG00000164109;ENSG00000166851;ENSG00000167513;ENSG00000169679;ENSG00000178999
GO:0031577	spindle checkpoint	12	39	4.52241826680781e-11	7.35558029866094e-09	ENSG00000071539;ENSG00000080986;ENSG00000112742;ENSG00000117399;ENSG00000117724;ENSG00000134057;ENSG00000156970;ENSG00000164109;ENSG00000166851;ENSG00000167513;ENSG00000169679;ENSG00000178999
GO:0030198	extracellular matrix organization	35	416	4.73753192473895e-11	7.48530044108755e-09	ENSG00000005884;ENSG00000038427;ENSG00000041982;ENSG00000049089;ENSG00000054598;ENSG00000058085;ENSG00000075618;ENSG00000077942;ENSG00000087245;ENSG00000091136;ENSG00000100985;ENSG00000113083;ENSG00000117122;ENSG00000118785;ENSG00000122176;ENSG00000132031;ENSG00000132470;ENSG00000133110;ENSG00000136943;ENSG00000137573;ENSG00000137673;ENSG00000141756;ENSG00000157227;ENSG00000157483;ENSG00000157613…
GO:0051985	negative regulation of chromosome segregation	13	49	5.64329692764302e-11	8.66873111385164e-09	ENSG00000071539;ENSG00000080986;ENSG00000112742;ENSG00000117399;ENSG00000117724;ENSG00000134057;ENSG00000156970;ENSG00000164109;ENSG00000164611;ENSG00000166851;ENSG00000167513;ENSG00000169679;ENSG00000178999
GO:0045841	negative regulation of mitotic metaphase/anaphase transition	12	40	6.32668370063021e-11	9.45582726067164e-09	ENSG00000071539;ENSG00000080986;ENSG00000112742;ENSG00000117399;ENSG00000117724;ENSG00000134057;ENSG00000156970;ENSG00000164109;ENSG00000166851;ENSG00000167513;ENSG00000169679;ENSG00000178999
GO:0051783	regulation of nuclear division	24	205	7.54682108779521e-11	1.09826106882915e-08	ENSG00000011426;ENSG00000013810;ENSG00000071539;ENSG00000080986;ENSG00000094804;ENSG00000112742;ENSG00000117399;ENSG00000117650;ENSG00000117724;ENSG00000126787;ENSG00000128342;ENSG00000134057;ENSG00000138160;ENSG00000146670;ENSG00000148773;ENSG00000156970;ENSG00000164109;ENSG00000164611;ENSG00000166851;ENSG00000167513;ENSG00000169679;ENSG00000175063;ENSG00000176170;ENSG00000178999
GO:1902100	negative regulation of metaphase/anaphase transition of cell cycle	12	42	1.2008789099087e-10	1.70278471071669e-08	ENSG00000071539;ENSG00000080986;ENSG00000112742;ENSG00000117399;ENSG00000117724;ENSG00000134057;ENSG00000156970;ENSG00000164109;ENSG00000166851;ENSG00000167513;ENSG00000169679;ENSG00000178999
GO:0051784	negative regulation of nuclear division	14	65	2.14002123765998e-10	2.95857936106492e-08	ENSG00000071539;ENSG00000080986;ENSG00000112742;ENSG00000117399;ENSG00000117724;ENSG00000128342;ENSG00000134057;ENSG00000156970;ENSG00000164109;ENSG00000164611;ENSG00000166851;ENSG00000167513;ENSG00000169679;ENSG00000178999
GO:0045839	negative regulation of mitotic nuclear division	13	55	2.74921784557465e-10	3.70809138683605e-08	ENSG00000071539;ENSG00000080986;ENSG00000112742;ENSG00000117399;ENSG00000117724;ENSG00000134057;ENSG00000156970;ENSG00000164109;ENSG00000164611;ENSG00000166851;ENSG00000167513;ENSG00000169679;ENSG00000178999
GO:0042127	regulation of cell proliferation	79	1655	3.49156365242471e-10	4.59722547569253e-08	ENSG00000041982;ENSG00000049130;ENSG00000051523;ENSG00000058085;ENSG00000076864;ENSG00000077782;ENSG00000077942;ENSG00000085662;ENSG00000087245;ENSG00000087494;ENSG00000088992;ENSG00000089685;ENSG00000091136;ENSG00000094804;ENSG00000095970;ENSG00000100985;ENSG00000104419;ENSG00000104951;ENSG00000105173;ENSG00000105472;ENSG00000105894;ENSG00000110811;ENSG00000111206;ENSG00000112742;ENSG00000117399…
GO:0043062	extracellular structure organization	36	475	4.57783448323319e-10	5.88730806797198e-08	ENSG00000005884;ENSG00000038427;ENSG00000041982;ENSG00000049089;ENSG00000054598;ENSG00000058085;ENSG00000075618;ENSG00000077942;ENSG00000087245;ENSG00000091136;ENSG00000100985;ENSG00000113083;ENSG00000117122;ENSG00000118785;ENSG00000122176;ENSG00000132031;ENSG00000132470;ENSG00000133110;ENSG00000136943;ENSG00000137573;ENSG00000137673;ENSG00000141756;ENSG00000146070;ENSG00000157227;ENSG00000157483…
GO:0007565	female pregnancy	21	194	4.9295515015083e-09	6.19554995530475e-07	ENSG00000005884;ENSG00000077942;ENSG00000085662;ENSG00000087245;ENSG00000087494;ENSG00000100985;ENSG00000105894;ENSG00000111371;ENSG00000113739;ENSG00000116741;ENSG00000117394;ENSG00000118785;ENSG00000128342;ENSG00000130427;ENSG00000132470;ENSG00000135077;ENSG00000136943;ENSG00000137673;ENSG00000145708;ENSG00000164171;ENSG00000204580
GO:0007093	mitotic cell cycle checkpoint	19	160	5.78672478364495e-09	7.11124178967924e-07	ENSG00000071539;ENSG00000075218;ENSG00000080986;ENSG00000085840;ENSG00000094804;ENSG00000112742;ENSG00000117399;ENSG00000117724;ENSG00000124766;ENSG00000134057;ENSG00000156970;ENSG00000164109;ENSG00000166851;ENSG00000167513;ENSG00000169679;ENSG00000170312;ENSG00000175793;ENSG00000178999;ENSG00000185499
GO:0044772	mitotic cell cycle phase transition	36	558	3.20191618338271e-08	3.80739121836201e-06	ENSG00000006611;ENSG00000011426;ENSG00000013810;ENSG00000071539;ENSG00000075218;ENSG00000080986;ENSG00000085840;ENSG00000088325;ENSG00000093009;ENSG00000094804;ENSG00000105173;ENSG00000111206;ENSG00000112742;ENSG00000117399;ENSG00000117650;ENSG00000117724;ENSG00000124766;ENSG00000126787;ENSG00000134057;ENSG00000145386;ENSG00000146670;ENSG00000147889;ENSG00000156970;ENSG00000157456;ENSG00000164045…
GO:0090307	mitotic spindle assembly	12	66	3.23593828685379e-08	3.80739121836201e-06	ENSG00000088325;ENSG00000090889;ENSG00000099812;ENSG00000101057;ENSG00000117399;ENSG00000117650;ENSG00000137807;ENSG00000138160;ENSG00000161800;ENSG00000166851;ENSG00000178999;ENSG00000237649
GO:0022402	cell cycle process	67	1459	4.50021781404278e-08	5.18462593992845e-06	ENSG00000006611;ENSG00000011426;ENSG00000013810;ENSG00000051180;ENSG00000068489;ENSG00000071539;ENSG00000075218;ENSG00000080986;ENSG00000085840;ENSG00000088325;ENSG00000089685;ENSG00000090889;ENSG00000093009;ENSG00000094804;ENSG00000099812;ENSG00000100162;ENSG00000101003;ENSG00000101057;ENSG00000105173;ENSG00000109805;ENSG00000111206;ENSG00000112742;ENSG00000112984;ENSG00000114346;ENSG00000115163…
GO:0044706	multi-multicellular organism process	21	223	5.77387998570526e-08	6.51623598386737e-06	ENSG00000005884;ENSG00000077942;ENSG00000085662;ENSG00000087245;ENSG00000087494;ENSG00000100985;ENSG00000105894;ENSG00000111371;ENSG00000113739;ENSG00000116741;ENSG00000117394;ENSG00000118785;ENSG00000128342;ENSG00000130427;ENSG00000132470;ENSG00000135077;ENSG00000136943;ENSG00000137673;ENSG00000145708;ENSG00000164171;ENSG00000204580
GO:0016477	cell migration	69	1540	7.12365895076885e-08	7.87876679955034e-06	ENSG00000005884;ENSG00000011426;ENSG00000034510;ENSG00000035499;ENSG00000038427;ENSG00000049130;ENSG00000054598;ENSG00000058085;ENSG00000069849;ENSG00000070087;ENSG00000075218;ENSG00000075618;ENSG00000076716;ENSG00000077782;ENSG00000077942;ENSG00000091129;ENSG00000091136;ENSG00000092068;ENSG00000092445;ENSG00000095970;ENSG00000099812;ENSG00000100604;ENSG00000100985;ENSG00000102359;ENSG00000103222…
GO:0044770	cell cycle phase transition	37	605	8.06765217949317e-08	8.74786599070534e-06	ENSG00000006611;ENSG00000011426;ENSG00000013810;ENSG00000071539;ENSG00000075218;ENSG00000080986;ENSG00000085840;ENSG00000088325;ENSG00000093009;ENSG00000094804;ENSG00000105173;ENSG00000111206;ENSG00000112742;ENSG00000117399;ENSG00000117650;ENSG00000117724;ENSG00000124766;ENSG00000126787;ENSG00000134057;ENSG00000141934;ENSG00000145386;ENSG00000146670;ENSG00000147889;ENSG00000156970;ENSG00000157456…
GO:0008608	attachment of spindle microtubules to kinetochore	9	36	9.51747629117475e-08	1.01214699788839e-05	ENSG00000080986;ENSG00000114346;ENSG00000117650;ENSG00000134057;ENSG00000142945;ENSG00000143228;ENSG00000161800;ENSG00000167513;ENSG00000178999
GO:0000226	microtubule cytoskeleton organization	39	663	9.85906634813784e-08	1.02869126236231e-05	ENSG00000013810;ENSG00000077274;ENSG00000080986;ENSG00000088325;ENSG00000089685;ENSG00000090889;ENSG00000099812;ENSG00000100162;ENSG00000101057;ENSG00000104435;ENSG00000109846;ENSG00000112742;ENSG00000112984;ENSG00000115163;ENSG00000117399;ENSG00000117650;ENSG00000117724;ENSG00000126787;ENSG00000129654;ENSG00000134057;ENSG00000134690;ENSG00000137285;ENSG00000137807;ENSG00000138160;ENSG00000142945…
GO:0000075	cell cycle checkpoint	20	211	1.07550139692499e-07	1.10139309722133e-05	ENSG00000071539;ENSG00000075218;ENSG00000080986;ENSG00000085840;ENSG00000093009;ENSG00000094804;ENSG00000112742;ENSG00000117399;ENSG00000117724;ENSG00000124766;ENSG00000134057;ENSG00000156970;ENSG00000164109;ENSG00000166851;ENSG00000167513;ENSG00000169679;ENSG00000170312;ENSG00000175793;ENSG00000178999;ENSG00000185499
GO:0007049	cell cycle	79	1912	2.08333155811722e-07	2.09469518479786e-05	ENSG00000006611;ENSG00000011426;ENSG00000013810;ENSG00000051180;ENSG00000054598;ENSG00000068489;ENSG00000071539;ENSG00000075218;ENSG00000080986;ENSG00000085840;ENSG00000088325;ENSG00000089685;ENSG00000090889;ENSG00000093009;ENSG00000094804;ENSG00000099812;ENSG00000100162;ENSG00000101003;ENSG00000101057;ENSG00000105173;ENSG00000109805;ENSG00000111206;ENSG00000112742;ENSG00000112984;ENSG00000114346…
GO:0006928	movement of cell or subcellular component	87	2196	2.76773593404666e-07	2.73313923487108e-05	ENSG00000005884;ENSG00000011426;ENSG00000034510;ENSG00000035499;ENSG00000038427;ENSG00000046604;ENSG00000049130;ENSG00000053918;ENSG00000054598;ENSG00000058085;ENSG00000069849;ENSG00000070087;ENSG00000075218;ENSG00000075618;ENSG00000076716;ENSG00000076864;ENSG00000077782;ENSG00000077942;ENSG00000090889;ENSG00000091129;ENSG00000091136;ENSG00000092068;ENSG00000092445;ENSG00000095970;ENSG00000099812…
GO:0022414	reproductive process	65	1475	3.31943348974794e-07	3.22043284180809e-05	ENSG00000005884;ENSG00000041982;ENSG00000049130;ENSG00000051180;ENSG00000054598;ENSG00000071539;ENSG00000077942;ENSG00000079462;ENSG00000085662;ENSG00000087245;ENSG00000087494;ENSG00000088992;ENSG00000092445;ENSG00000100985;ENSG00000101443;ENSG00000105173;ENSG00000105894;ENSG00000110195;ENSG00000111371;ENSG00000112559;ENSG00000112742;ENSG00000113739;ENSG00000116741;ENSG00000117394;ENSG00000117399…
GO:0000003	reproduction	65	1478	3.56875885482683e-07	3.40262697710214e-05	ENSG00000005884;ENSG00000041982;ENSG00000049130;ENSG00000051180;ENSG00000054598;ENSG00000071539;ENSG00000077942;ENSG00000079462;ENSG00000085662;ENSG00000087245;ENSG00000087494;ENSG00000088992;ENSG00000092445;ENSG00000100985;ENSG00000101443;ENSG00000105173;ENSG00000105894;ENSG00000110195;ENSG00000111371;ENSG00000112559;ENSG00000112742;ENSG00000113739;ENSG00000116741;ENSG00000117394;ENSG00000117399…
GO:1901991	negative regulation of mitotic cell cycle phase transition	20	238	7.5158155861251e-07	7.04448477818166e-05	ENSG00000071539;ENSG00000075218;ENSG00000080986;ENSG00000085840;ENSG00000094804;ENSG00000112742;ENSG00000117399;ENSG00000117724;ENSG00000124766;ENSG00000134057;ENSG00000147889;ENSG00000156970;ENSG00000164109;ENSG00000166851;ENSG00000167513;ENSG00000169679;ENSG00000170312;ENSG00000175793;ENSG00000178999;ENSG00000185499
GO:0033044	regulation of chromosome organization	26	379	8.86441629101744e-07	8.17003701488775e-05	ENSG00000013810;ENSG00000071539;ENSG00000080986;ENSG00000093009;ENSG00000094804;ENSG00000112742;ENSG00000117399;ENSG00000117650;ENSG00000117724;ENSG00000126787;ENSG00000128342;ENSG00000131747;ENSG00000134057;ENSG00000135549;ENSG00000137309;ENSG00000146670;ENSG00000148773;ENSG00000156970;ENSG00000164109;ENSG00000164611;ENSG00000166851;ENSG00000167513;ENSG00000169679;ENSG00000175063;ENSG00000178999…
GO:0030574	collagen catabolic process	9	47	1.09948443860078e-06	9.96745728764315e-05	ENSG00000011028;ENSG00000087245;ENSG00000100985;ENSG00000137673;ENSG00000157227;ENSG00000175309;ENSG00000196611;ENSG00000262406;ENSG00000275896
GO:0071459	protein localization to chromosome, centromeric region	7	25	1.13966959107769e-06	0.000100678727044621	ENSG00000080986;ENSG00000112742;ENSG00000115163;ENSG00000156970;ENSG00000167513;ENSG00000170312;ENSG00000178999
GO:0008284	positive regulation of cell proliferation	46	934	1.14697283974885e-06	0.000100678727044621	ENSG00000041982;ENSG00000049130;ENSG00000051523;ENSG00000058085;ENSG00000077782;ENSG00000077942;ENSG00000085662;ENSG00000087245;ENSG00000087494;ENSG00000089685;ENSG00000091136;ENSG00000094804;ENSG00000100985;ENSG00000105173;ENSG00000105472;ENSG00000105894;ENSG00000111206;ENSG00000112742;ENSG00000117399;ENSG00000117525;ENSG00000124766;ENSG00000128342;ENSG00000130427;ENSG00000134057;ENSG00000135077…
GO:0060135	maternal process involved in female pregnancy	10	62	1.46327590406519e-06	0.000126436183585633	ENSG00000005884;ENSG00000085662;ENSG00000105894;ENSG00000113739;ENSG00000116741;ENSG00000118785;ENSG00000128342;ENSG00000135077;ENSG00000136943;ENSG00000137673
GO:0010948	negative regulation of cell cycle process	24	345	1.83776938251428e-06	0.000156351764389292	ENSG00000051180;ENSG00000071539;ENSG00000075218;ENSG00000080986;ENSG00000085840;ENSG00000094804;ENSG00000112742;ENSG00000117399;ENSG00000117650;ENSG00000117724;ENSG00000124766;ENSG00000128342;ENSG00000134057;ENSG00000147889;ENSG00000156970;ENSG00000164109;ENSG00000164611;ENSG00000166851;ENSG00000167513;ENSG00000169679;ENSG00000170312;ENSG00000175793;ENSG00000178999;ENSG00000185499
GO:0007080	mitotic metaphase plate congression	9	50	1.90114652705653e-06	0.000159293034767009	ENSG00000080986;ENSG00000134057;ENSG00000134690;ENSG00000142945;ENSG00000143228;ENSG00000146670;ENSG00000167513;ENSG00000178999;ENSG00000237649
GO:0010564	regulation of cell cycle process	40	776	1.99627400849009e-06	0.00016476709353657	ENSG00000011426;ENSG00000013810;ENSG00000051180;ENSG00000071539;ENSG00000075218;ENSG00000080986;ENSG00000085840;ENSG00000088325;ENSG00000094804;ENSG00000111206;ENSG00000112742;ENSG00000112984;ENSG00000114346;ENSG00000117399;ENSG00000117650;ENSG00000117724;ENSG00000124766;ENSG00000126787;ENSG00000128342;ENSG00000134057;ENSG00000137807;ENSG00000138160;ENSG00000141934;ENSG00000146670;ENSG00000147889…
GO:1901988	negative regulation of cell cycle phase transition	20	254	2.07446121770594e-06	0.000168702507851674	ENSG00000071539;ENSG00000075218;ENSG00000080986;ENSG00000085840;ENSG00000094804;ENSG00000112742;ENSG00000117399;ENSG00000117724;ENSG00000124766;ENSG00000134057;ENSG00000147889;ENSG00000156970;ENSG00000164109;ENSG00000166851;ENSG00000167513;ENSG00000169679;ENSG00000170312;ENSG00000175793;ENSG00000178999;ENSG00000185499
GO:0048870	cell motility	70	1722	2.13758252725125e-06	0.000168869019652848	ENSG00000005884;ENSG00000011426;ENSG00000034510;ENSG00000035499;ENSG00000038427;ENSG00000049130;ENSG00000054598;ENSG00000058085;ENSG00000069849;ENSG00000070087;ENSG00000075218;ENSG00000075618;ENSG00000076716;ENSG00000077782;ENSG00000077942;ENSG00000091129;ENSG00000091136;ENSG00000092068;ENSG00000092445;ENSG00000095970;ENSG00000099812;ENSG00000100604;ENSG00000100985;ENSG00000102359;ENSG00000103222…
GO:0051674	localization of cell	70	1722	2.13758252725125e-06	0.000168869019652848	ENSG00000005884;ENSG00000011426;ENSG00000034510;ENSG00000035499;ENSG00000038427;ENSG00000049130;ENSG00000054598;ENSG00000058085;ENSG00000069849;ENSG00000070087;ENSG00000075218;ENSG00000075618;ENSG00000076716;ENSG00000077782;ENSG00000077942;ENSG00000091129;ENSG00000091136;ENSG00000092068;ENSG00000092445;ENSG00000095970;ENSG00000099812;ENSG00000100604;ENSG00000100985;ENSG00000102359;ENSG00000103222…
GO:1901990	regulation of mitotic cell cycle phase transition	27	423	2.17797611955895e-06	0.000169636731565648	ENSG00000011426;ENSG00000071539;ENSG00000075218;ENSG00000080986;ENSG00000085840;ENSG00000088325;ENSG00000094804;ENSG00000112742;ENSG00000117399;ENSG00000117650;ENSG00000117724;ENSG00000124766;ENSG00000126787;ENSG00000134057;ENSG00000146670;ENSG00000147889;ENSG00000156970;ENSG00000164045;ENSG00000164109;ENSG00000166851;ENSG00000167513;ENSG00000169679;ENSG00000170312;ENSG00000175063;ENSG00000175793…
GO:0051310	metaphase plate congression	10	65	2.29015872798094e-06	0.000175896913412981	ENSG00000080986;ENSG00000117724;ENSG00000134057;ENSG00000134690;ENSG00000142945;ENSG00000143228;ENSG00000146670;ENSG00000167513;ENSG00000178999;ENSG00000237649
GO:2001251	negative regulation of chromosome organization	15	152	2.55853449904626e-06	0.000193817750407203	ENSG00000071539;ENSG00000080986;ENSG00000112742;ENSG00000117399;ENSG00000117724;ENSG00000131747;ENSG00000134057;ENSG00000137309;ENSG00000156970;ENSG00000164109;ENSG00000164611;ENSG00000166851;ENSG00000167513;ENSG00000169679;ENSG00000178999
GO:0051225	spindle assembly	13	115	2.63176159750187e-06	0.000194988897381048	ENSG00000088325;ENSG00000090889;ENSG00000099812;ENSG00000101057;ENSG00000117399;ENSG00000117650;ENSG00000137807;ENSG00000138160;ENSG00000157456;ENSG00000161800;ENSG00000166851;ENSG00000178999;ENSG00000237649
GO:0051094	positive regulation of developmental process	60	1403	2.66410217489937e-06	0.000194988897381048	ENSG00000005884;ENSG00000007062;ENSG00000049130;ENSG00000054598;ENSG00000067225;ENSG00000077782;ENSG00000088992;ENSG00000091129;ENSG00000092929;ENSG00000095970;ENSG00000102359;ENSG00000102837;ENSG00000104435;ENSG00000104951;ENSG00000105894;ENSG00000106541;ENSG00000107984;ENSG00000112655;ENSG00000113758;ENSG00000114346;ENSG00000116741;ENSG00000117399;ENSG00000117525;ENSG00000124664;ENSG00000124766…
GO:0007566	embryo implantation	9	52	2.67977508154786e-06	0.000194988897381048	ENSG00000077942;ENSG00000087245;ENSG00000100985;ENSG00000113739;ENSG00000118785;ENSG00000128342;ENSG00000130427;ENSG00000132470;ENSG00000204580
GO:0051303	establishment of chromosome localization	11	82	2.88422043767168e-06	0.000207139467796421	ENSG00000080986;ENSG00000117724;ENSG00000126787;ENSG00000134057;ENSG00000134690;ENSG00000142945;ENSG00000143228;ENSG00000146670;ENSG00000167513;ENSG00000178999;ENSG00000237649
GO:0050000	chromosome localization	11	84	3.67053182740908e-06	0.000260231294943234	ENSG00000080986;ENSG00000117724;ENSG00000126787;ENSG00000134057;ENSG00000134690;ENSG00000142945;ENSG00000143228;ENSG00000146670;ENSG00000167513;ENSG00000178999;ENSG00000237649
GO:0002495	antigen processing and presentation of peptide antigen via MHC class II	12	101	3.77592428987497e-06	0.000261311015271957	ENSG00000090889;ENSG00000095970;ENSG00000129354;ENSG00000136943;ENSG00000137807;ENSG00000138160;ENSG00000142945;ENSG00000158869;ENSG00000161800;ENSG00000196188;ENSG00000204252;ENSG00000232629
GO:0045930	negative regulation of mitotic cell cycle	22	311	3.78026785203554e-06	0.000261311015271957	ENSG00000054598;ENSG00000071539;ENSG00000075218;ENSG00000080986;ENSG00000085840;ENSG00000094804;ENSG00000112742;ENSG00000117399;ENSG00000117724;ENSG00000124766;ENSG00000134057;ENSG00000147889;ENSG00000156970;ENSG00000164109;ENSG00000164611;ENSG00000166851;ENSG00000167513;ENSG00000169679;ENSG00000170312;ENSG00000175793;ENSG00000178999;ENSG00000185499
GO:1901987	regulation of cell cycle phase transition	28	463	3.98971375091864e-06	0.000272151223495547	ENSG00000011426;ENSG00000071539;ENSG00000075218;ENSG00000080986;ENSG00000085840;ENSG00000088325;ENSG00000094804;ENSG00000112742;ENSG00000117399;ENSG00000117650;ENSG00000117724;ENSG00000124766;ENSG00000126787;ENSG00000134057;ENSG00000141934;ENSG00000146670;ENSG00000147889;ENSG00000156970;ENSG00000164045;ENSG00000164109;ENSG00000166851;ENSG00000167513;ENSG00000169679;ENSG00000170312;ENSG00000175063…
GO:0007017	microtubule-based process	42	858	4.03551542977121e-06	0.000272151223495547	ENSG00000013810;ENSG00000075218;ENSG00000077274;ENSG00000080986;ENSG00000088325;ENSG00000089685;ENSG00000090889;ENSG00000099812;ENSG00000100162;ENSG00000101057;ENSG00000104435;ENSG00000109846;ENSG00000112742;ENSG00000112984;ENSG00000115163;ENSG00000117399;ENSG00000117650;ENSG00000117724;ENSG00000126787;ENSG00000129654;ENSG00000134057;ENSG00000134690;ENSG00000137285;ENSG00000137807;ENSG00000138160…
GO:0070887	cellular response to chemical stimulus	113	3291	4.50521086741112e-06	0.000300166458997391	ENSG00000005884;ENSG00000019505;ENSG00000041982;ENSG00000051180;ENSG00000051523;ENSG00000053918;ENSG00000054598;ENSG00000067057;ENSG00000067225;ENSG00000074800;ENSG00000075618;ENSG00000076864;ENSG00000077782;ENSG00000085491;ENSG00000085662;ENSG00000087245;ENSG00000088826;ENSG00000088992;ENSG00000089685;ENSG00000094804;ENSG00000095970;ENSG00000100604;ENSG00000100985;ENSG00000101057;ENSG00000102007…
GO:0007346	regulation of mitotic cell cycle	34	630	4.571689962195e-06	0.000300969589177838	ENSG00000011426;ENSG00000013810;ENSG00000054598;ENSG00000071539;ENSG00000075218;ENSG00000080986;ENSG00000085840;ENSG00000088325;ENSG00000089685;ENSG00000094804;ENSG00000112742;ENSG00000117399;ENSG00000117650;ENSG00000117724;ENSG00000124766;ENSG00000126787;ENSG00000134057;ENSG00000138160;ENSG00000146670;ENSG00000147889;ENSG00000148773;ENSG00000156970;ENSG00000164045;ENSG00000164109;ENSG00000164611…
GO:0002274	myeloid leukocyte activation	35	659	4.68944722492775e-06	0.000305089919457064	ENSG00000011422;ENSG00000051523;ENSG00000067225;ENSG00000092929;ENSG00000095970;ENSG00000100604;ENSG00000100985;ENSG00000102837;ENSG00000104419;ENSG00000106348;ENSG00000109861;ENSG00000122861;ENSG00000133063;ENSG00000135077;ENSG00000141524;ENSG00000143226;ENSG00000143546;ENSG00000145920;ENSG00000149925;ENSG00000150782;ENSG00000153395;ENSG00000155659;ENSG00000158869;ENSG00000163191;ENSG00000163220…
GO:0007010	cytoskeleton organization	61	1463	4.88292644843492e-06	0.000313983526277269	ENSG00000006611;ENSG00000011426;ENSG00000013810;ENSG00000034510;ENSG00000070087;ENSG00000075618;ENSG00000077274;ENSG00000080986;ENSG00000088325;ENSG00000089685;ENSG00000090889;ENSG00000099812;ENSG00000100162;ENSG00000101057;ENSG00000104435;ENSG00000109846;ENSG00000112655;ENSG00000112742;ENSG00000112984;ENSG00000113758;ENSG00000114346;ENSG00000115163;ENSG00000117399;ENSG00000117650;ENSG00000117724…
GO:0002504	antigen processing and presentation of peptide or polysaccharide antigen via MHC class II	12	104	5.14401135690439e-06	0.000323254350041833	ENSG00000090889;ENSG00000095970;ENSG00000129354;ENSG00000136943;ENSG00000137807;ENSG00000138160;ENSG00000142945;ENSG00000158869;ENSG00000161800;ENSG00000196188;ENSG00000204252;ENSG00000232629
GO:0032963	collagen metabolic process	12	104	5.14401135690439e-06	0.000323254350041833	ENSG00000011028;ENSG00000087245;ENSG00000100985;ENSG00000110811;ENSG00000137673;ENSG00000157227;ENSG00000157613;ENSG00000164171;ENSG00000175309;ENSG00000196611;ENSG00000262406;ENSG00000275896
GO:0007155	cell adhesion	61	1472	5.92123385999487e-06	0.000367914867930018	ENSG00000005884;ENSG00000011422;ENSG00000038427;ENSG00000041982;ENSG00000046604;ENSG00000049130;ENSG00000058085;ENSG00000076716;ENSG00000077942;ENSG00000088992;ENSG00000091129;ENSG00000091136;ENSG00000092445;ENSG00000092929;ENSG00000102359;ENSG00000102837;ENSG00000104951;ENSG00000105894;ENSG00000106123;ENSG00000106541;ENSG00000110195;ENSG00000112655;ENSG00000118785;ENSG00000122861;ENSG00000124766…
GO:0030155	regulation of cell adhesion	37	726	6.37083785596611e-06	0.000391452592705473	ENSG00000005884;ENSG00000011422;ENSG00000041982;ENSG00000077942;ENSG00000088992;ENSG00000092929;ENSG00000102837;ENSG00000104951;ENSG00000105894;ENSG00000106123;ENSG00000106541;ENSG00000122861;ENSG00000124766;ENSG00000128342;ENSG00000129654;ENSG00000130427;ENSG00000133110;ENSG00000135077;ENSG00000139514;ENSG00000147889;ENSG00000150782;ENSG00000151882;ENSG00000155659;ENSG00000155760;ENSG00000157227…
GO:0022610	biological adhesion	61	1479	6.86757111701774e-06	0.000417337014034155	ENSG00000005884;ENSG00000011422;ENSG00000038427;ENSG00000041982;ENSG00000046604;ENSG00000049130;ENSG00000058085;ENSG00000076716;ENSG00000077942;ENSG00000088992;ENSG00000091129;ENSG00000091136;ENSG00000092445;ENSG00000092929;ENSG00000102359;ENSG00000102837;ENSG00000104951;ENSG00000105894;ENSG00000106123;ENSG00000106541;ENSG00000110195;ENSG00000112655;ENSG00000118785;ENSG00000122861;ENSG00000124766…
GO:0040011	locomotion	75	1954	7.13077487966065e-06	0.000428621577005689	ENSG00000005884;ENSG00000011422;ENSG00000011426;ENSG00000034510;ENSG00000035499;ENSG00000038427;ENSG00000049130;ENSG00000054598;ENSG00000058085;ENSG00000069849;ENSG00000070087;ENSG00000075218;ENSG00000075618;ENSG00000076716;ENSG00000076864;ENSG00000077782;ENSG00000077942;ENSG00000091129;ENSG00000091136;ENSG00000092068;ENSG00000092445;ENSG00000095970;ENSG00000099812;ENSG00000100604;ENSG00000100985…
GO:0051726	regulation of cell cycle	52	1200	9.29894193821291e-06	0.000548263403146481	ENSG00000011426;ENSG00000013810;ENSG00000051180;ENSG00000054598;ENSG00000068489;ENSG00000071539;ENSG00000075218;ENSG00000080986;ENSG00000085840;ENSG00000088325;ENSG00000089685;ENSG00000093009;ENSG00000094804;ENSG00000101057;ENSG00000105173;ENSG00000111206;ENSG00000112742;ENSG00000112984;ENSG00000114346;ENSG00000117399;ENSG00000117650;ENSG00000117724;ENSG00000124766;ENSG00000126787;ENSG00000128342…
GO:0001666	response to hypoxia	23	354	9.31948641876478e-06	0.000548263403146481	ENSG00000051523;ENSG00000074800;ENSG00000087245;ENSG00000104419;ENSG00000105894;ENSG00000107159;ENSG00000109846;ENSG00000113739;ENSG00000117394;ENSG00000122861;ENSG00000129521;ENSG00000130427;ENSG00000133110;ENSG00000134057;ENSG00000135245;ENSG00000145386;ENSG00000157227;ENSG00000159399;ENSG00000164171;ENSG00000165168;ENSG00000175344;ENSG00000214253;ENSG00000272398
GO:0055114	oxidation-reduction process	41	862	1.0541997565036e-05	0.000613610575957305	ENSG00000021461;ENSG00000051523;ENSG00000067057;ENSG00000067225;ENSG00000074800;ENSG00000085662;ENSG00000088826;ENSG00000104951;ENSG00000106258;ENSG00000106348;ENSG00000110811;ENSG00000111674;ENSG00000111713;ENSG00000111716;ENSG00000113083;ENSG00000116701;ENSG00000129521;ENSG00000130649;ENSG00000134057;ENSG00000139547;ENSG00000140505;ENSG00000146070;ENSG00000149925;ENSG00000159399;ENSG00000160211…
GO:0042738	exogenous drug catabolic process	6	23	1.07631511515115e-05	0.000613610575957305	ENSG00000130649;ENSG00000140505;ENSG00000160868;ENSG00000167600;ENSG00000197838;ENSG00000198077
GO:0051383	kinetochore organization	6	23	1.07631511515115e-05	0.000613610575957305	ENSG00000080986;ENSG00000115163;ENSG00000117724;ENSG00000126787;ENSG00000143228;ENSG00000167513
GO:0051988	regulation of attachment of spindle microtubules to kinetochore	5	14	1.09662855507879e-05	0.000618811827508745	ENSG00000114346;ENSG00000117650;ENSG00000134057;ENSG00000161800;ENSG00000178999
GO:0030858	positive regulation of epithelial cell differentiation	9	62	1.20450479658415e-05	0.000671577768337264	ENSG00000007062;ENSG00000054598;ENSG00000128342;ENSG00000129654;ENSG00000175793;ENSG00000175832;ENSG00000179593;ENSG00000221926;ENSG00000272398
GO:0010810	regulation of cell-substrate adhesion	17	216	1.21442634419035e-05	0.000671577768337264	ENSG00000005884;ENSG00000077942;ENSG00000092929;ENSG00000102837;ENSG00000105894;ENSG00000106541;ENSG00000122861;ENSG00000133110;ENSG00000147889;ENSG00000151882;ENSG00000155760;ENSG00000157227;ENSG00000164176;ENSG00000168743;ENSG00000184292;ENSG00000204580;ENSG00000262406
GO:0072139	glomerular parietal epithelial cell differentiation	3	3	1.2340741726131e-05	0.000675686155896082	ENSG00000007062;ENSG00000129654;ENSG00000272398
GO:0051128	regulation of cellular component organization	94	2661	1.2464380830129e-05	0.000675764960692289	ENSG00000005448;ENSG00000005884;ENSG00000006611;ENSG00000011422;ENSG00000011426;ENSG00000013810;ENSG00000034510;ENSG00000051523;ENSG00000070087;ENSG00000071539;ENSG00000074800;ENSG00000075618;ENSG00000076716;ENSG00000076864;ENSG00000077274;ENSG00000077942;ENSG00000080986;ENSG00000088325;ENSG00000091129;ENSG00000092929;ENSG00000093009;ENSG00000094804;ENSG00000095970;ENSG00000100985;ENSG00000102359…
GO:0006735	NADH regeneration	6	24	1.40718123030982e-05	0.000741115447963174	ENSG00000067057;ENSG00000067225;ENSG00000074800;ENSG00000111674;ENSG00000149925;ENSG00000159399
GO:0061621	canonical glycolysis	6	24	1.40718123030982e-05	0.000741115447963174	ENSG00000067057;ENSG00000067225;ENSG00000074800;ENSG00000111674;ENSG00000149925;ENSG00000159399
GO:0061718	glucose catabolic process to pyruvate	6	24	1.40718123030982e-05	0.000741115447963174	ENSG00000067057;ENSG00000067225;ENSG00000074800;ENSG00000111674;ENSG00000149925;ENSG00000159399
GO:0002275	myeloid cell activation involved in immune response	30	552	1.47635636499701e-05	0.000770212330040895	ENSG00000011422;ENSG00000051523;ENSG00000067225;ENSG00000092929;ENSG00000095970;ENSG00000100604;ENSG00000100985;ENSG00000102837;ENSG00000106348;ENSG00000109861;ENSG00000122861;ENSG00000133063;ENSG00000135077;ENSG00000141524;ENSG00000143226;ENSG00000143546;ENSG00000145920;ENSG00000149925;ENSG00000153395;ENSG00000158869;ENSG00000163191;ENSG00000163220;ENSG00000163687;ENSG00000163739;ENSG00000163993…
GO:0019886	antigen processing and presentation of exogenous peptide antigen via MHC class II	11	97	1.50181014589894e-05	0.000776169168861787	ENSG00000090889;ENSG00000129354;ENSG00000136943;ENSG00000137807;ENSG00000138160;ENSG00000142945;ENSG00000158869;ENSG00000161800;ENSG00000196188;ENSG00000204252;ENSG00000232629
GO:0051315	attachment of mitotic spindle microtubules to kinetochore	5	15	1.61371320265826e-05	0.000826280926916681	ENSG00000080986;ENSG00000142945;ENSG00000143228;ENSG00000167513;ENSG00000178999
GO:0042119	neutrophil activation	28	500	1.66528171020576e-05	0.000844863106186957	ENSG00000011422;ENSG00000051523;ENSG00000067225;ENSG00000092929;ENSG00000100985;ENSG00000102837;ENSG00000106348;ENSG00000109861;ENSG00000122861;ENSG00000133063;ENSG00000141524;ENSG00000143226;ENSG00000143546;ENSG00000149925;ENSG00000150782;ENSG00000153395;ENSG00000158869;ENSG00000163191;ENSG00000163220;ENSG00000163687;ENSG00000163739;ENSG00000163993;ENSG00000164687;ENSG00000165168;ENSG00000169429…
GO:0022617	extracellular matrix disassembly	10	81	1.72870512974577e-05	0.000869067215226738	ENSG00000075618;ENSG00000087245;ENSG00000100985;ENSG00000136943;ENSG00000137673;ENSG00000157227;ENSG00000196611;ENSG00000204580;ENSG00000262406;ENSG00000275896
GO:0036293	response to decreased oxygen levels	23	369	1.81488485193055e-05	0.000904172363169005	ENSG00000051523;ENSG00000074800;ENSG00000087245;ENSG00000104419;ENSG00000105894;ENSG00000107159;ENSG00000109846;ENSG00000113739;ENSG00000117394;ENSG00000122861;ENSG00000129521;ENSG00000130427;ENSG00000133110;ENSG00000134057;ENSG00000135245;ENSG00000145386;ENSG00000157227;ENSG00000159399;ENSG00000164171;ENSG00000165168;ENSG00000175344;ENSG00000214253;ENSG00000272398
GO:0051256	mitotic spindle midzone assembly	4	8	1.84501290741683e-05	0.000910975123037057	ENSG00000090889;ENSG00000137807;ENSG00000161800;ENSG00000178999
GO:0090068	positive regulation of cell cycle process	20	297	2.13445677075133e-05	0.00103859298314537	ENSG00000075218;ENSG00000080986;ENSG00000094804;ENSG00000114346;ENSG00000124766;ENSG00000126787;ENSG00000134057;ENSG00000137807;ENSG00000146670;ENSG00000147889;ENSG00000161800;ENSG00000164045;ENSG00000164109;ENSG00000167513;ENSG00000170312;ENSG00000175063;ENSG00000175793;ENSG00000176170;ENSG00000178999;ENSG00000185499
GO:0036230	granulocyte activation	28	507	2.1410415927409e-05	0.00103859298314537	ENSG00000011422;ENSG00000051523;ENSG00000067225;ENSG00000092929;ENSG00000100985;ENSG00000102837;ENSG00000106348;ENSG00000109861;ENSG00000122861;ENSG00000133063;ENSG00000141524;ENSG00000143226;ENSG00000143546;ENSG00000149925;ENSG00000150782;ENSG00000153395;ENSG00000158869;ENSG00000163191;ENSG00000163220;ENSG00000163687;ENSG00000163739;ENSG00000163993;ENSG00000164687;ENSG00000165168;ENSG00000169429…
GO:0051239	regulation of multicellular organismal process	109	3253	2.16212471285549e-05	0.00103969997061659	ENSG00000005884;ENSG00000007062;ENSG00000011422;ENSG00000046604;ENSG00000049130;ENSG00000051523;ENSG00000053918;ENSG00000054598;ENSG00000067225;ENSG00000069849;ENSG00000070087;ENSG00000074800;ENSG00000075461;ENSG00000076716;ENSG00000076864;ENSG00000077782;ENSG00000077942;ENSG00000087494;ENSG00000088992;ENSG00000089356;ENSG00000091129;ENSG00000095970;ENSG00000096433;ENSG00000100604;ENSG00000100985…
GO:0061620	glycolytic process through glucose-6-phosphate	6	26	2.31437540935717e-05	0.00110331862187458	ENSG00000067057;ENSG00000067225;ENSG00000074800;ENSG00000111674;ENSG00000149925;ENSG00000159399
GO:0044703	multi-organism reproductive process	46	1056	2.80160270143809e-05	0.00132081682086117	ENSG00000005884;ENSG00000054598;ENSG00000071539;ENSG00000077942;ENSG00000079462;ENSG00000085662;ENSG00000087245;ENSG00000087494;ENSG00000092445;ENSG00000100985;ENSG00000101443;ENSG00000105894;ENSG00000110195;ENSG00000111371;ENSG00000112742;ENSG00000113739;ENSG00000116741;ENSG00000117394;ENSG00000118785;ENSG00000122133;ENSG00000124102;ENSG00000128242;ENSG00000128342;ENSG00000129654;ENSG00000130427…
GO:0051179	localization	197	6771	2.81837947308533e-05	0.00132081682086117	ENSG00000005059;ENSG00000005421;ENSG00000005448;ENSG00000005884;ENSG00000006611;ENSG00000011028;ENSG00000011422;ENSG00000011426;ENSG00000019505;ENSG00000034510;ENSG00000035499;ENSG00000038427;ENSG00000046604;ENSG00000049130;ENSG00000051523;ENSG00000053918;ENSG00000054598;ENSG00000058085;ENSG00000067225;ENSG00000069849;ENSG00000070087;ENSG00000074410;ENSG00000075218;ENSG00000075461;ENSG00000075618…
GO:0061615	glycolytic process through fructose-6-phosphate	6	27	2.91783319416914e-05	0.00135593424905507	ENSG00000067057;ENSG00000067225;ENSG00000074800;ENSG00000111674;ENSG00000149925;ENSG00000159399
GO:0000022	mitotic spindle elongation	4	9	3.26024549747084e-05	0.00149001302487717	ENSG00000090889;ENSG00000137807;ENSG00000161800;ENSG00000178999
GO:0051231	spindle elongation	4	9	3.26024549747084e-05	0.00149001302487717	ENSG00000090889;ENSG00000137807;ENSG00000161800;ENSG00000178999
GO:0006690	icosanoid metabolic process	12	125	3.3879352028563e-05	0.00153567882555699	ENSG00000005421;ENSG00000085662;ENSG00000103222;ENSG00000130649;ENSG00000132965;ENSG00000140505;ENSG00000148344;ENSG00000164687;ENSG00000167600;ENSG00000179593;ENSG00000197838;ENSG00000198077
GO:0045321	leukocyte activation	54	1325	3.42110976496439e-05	0.00153810869920757	ENSG00000011422;ENSG00000051523;ENSG00000067225;ENSG00000092445;ENSG00000092929;ENSG00000095970;ENSG00000100604;ENSG00000100985;ENSG00000102034;ENSG00000102837;ENSG00000104419;ENSG00000104951;ENSG00000106123;ENSG00000106348;ENSG00000109861;ENSG00000122861;ENSG00000124766;ENSG00000129654;ENSG00000130427;ENSG00000133063;ENSG00000135077;ENSG00000139514;ENSG00000141524;ENSG00000143226;ENSG00000143546…
GO:0006954	inflammatory response	42	945	4.04598256429494e-05	0.00180437770810895	ENSG00000051523;ENSG00000080293;ENSG00000087494;ENSG00000092445;ENSG00000092929;ENSG00000095970;ENSG00000100985;ENSG00000103222;ENSG00000105894;ENSG00000106123;ENSG00000109861;ENSG00000117525;ENSG00000118785;ENSG00000130427;ENSG00000132965;ENSG00000135077;ENSG00000140274;ENSG00000140835;ENSG00000143226;ENSG00000143546;ENSG00000145623;ENSG00000145708;ENSG00000146070;ENSG00000148344;ENSG00000150782…
GO:0048002	antigen processing and presentation of peptide antigen	15	193	4.54412265895781e-05	0.00198303670741052	ENSG00000051523;ENSG00000090889;ENSG00000095970;ENSG00000116701;ENSG00000129354;ENSG00000136943;ENSG00000137807;ENSG00000138160;ENSG00000142945;ENSG00000158869;ENSG00000161800;ENSG00000165168;ENSG00000196188;ENSG00000204252;ENSG00000232629
GO:0006734	NADH metabolic process	7	42	4.55417110020138e-05	0.00198303670741052	ENSG00000067057;ENSG00000067225;ENSG00000074800;ENSG00000111674;ENSG00000149925;ENSG00000159399;ENSG00000181019
GO:0007096	regulation of exit from mitosis	7	42	4.55417110020138e-05	0.00198303670741052	ENSG00000011426;ENSG00000117399;ENSG00000117650;ENSG00000146670;ENSG00000156970;ENSG00000164109;ENSG00000175063
GO:1904844	response to L-glutamine	3	4	4.85114974641188e-05	0.00209584828887951	ENSG00000051523;ENSG00000165168;ENSG00000181019
GO:0042493	response to drug	45	1049	4.96568065271373e-05	0.00212869876042689	ENSG00000005884;ENSG00000019505;ENSG00000041982;ENSG00000051180;ENSG00000051523;ENSG00000053918;ENSG00000075461;ENSG00000085491;ENSG00000092068;ENSG00000103222;ENSG00000105281;ENSG00000105894;ENSG00000107159;ENSG00000109846;ENSG00000110195;ENSG00000113083;ENSG00000114346;ENSG00000116741;ENSG00000117724;ENSG00000130427;ENSG00000130649;ENSG00000134057;ENSG00000139514;ENSG00000140505;ENSG00000143546…
GO:0070482	response to oxygen levels	23	397	5.66697280261086e-05	0.0024106430460337	ENSG00000051523;ENSG00000074800;ENSG00000087245;ENSG00000104419;ENSG00000105894;ENSG00000107159;ENSG00000109846;ENSG00000113739;ENSG00000117394;ENSG00000122861;ENSG00000129521;ENSG00000130427;ENSG00000133110;ENSG00000134057;ENSG00000135245;ENSG00000145386;ENSG00000157227;ENSG00000159399;ENSG00000164171;ENSG00000165168;ENSG00000175344;ENSG00000214253;ENSG00000272398
GO:0000281	mitotic cytokinesis	9	75	5.72079748540064e-05	0.00241496260261569	ENSG00000011426;ENSG00000090889;ENSG00000112984;ENSG00000114346;ENSG00000115163;ENSG00000137807;ENSG00000138180;ENSG00000161800;ENSG00000166851
GO:0034501	protein localization to kinetochore	5	19	5.78792669929168e-05	0.00242479050356689	ENSG00000080986;ENSG00000112742;ENSG00000167513;ENSG00000170312;ENSG00000178999
GO:0001775	cell activation	58	1487	5.90098520372976e-05	0.00244506920314496	ENSG00000011422;ENSG00000051523;ENSG00000054179;ENSG00000067225;ENSG00000092445;ENSG00000092929;ENSG00000095970;ENSG00000096433;ENSG00000100604;ENSG00000100985;ENSG00000102034;ENSG00000102837;ENSG00000104419;ENSG00000104951;ENSG00000106123;ENSG00000106348;ENSG00000109861;ENSG00000122861;ENSG00000124766;ENSG00000129654;ENSG00000130427;ENSG00000133063;ENSG00000135077;ENSG00000139514;ENSG00000141524…
GO:0002478	antigen processing and presentation of exogenous peptide antigen	14	175	5.92476081774727e-05	0.00244506920314496	ENSG00000051523;ENSG00000090889;ENSG00000116701;ENSG00000129354;ENSG00000136943;ENSG00000137807;ENSG00000138160;ENSG00000142945;ENSG00000158869;ENSG00000161800;ENSG00000165168;ENSG00000196188;ENSG00000204252;ENSG00000232629
GO:0050793	regulation of developmental process	91	2668	6.83989422537893e-05	0.00280182333824781	ENSG00000005884;ENSG00000007062;ENSG00000021300;ENSG00000049130;ENSG00000054598;ENSG00000067225;ENSG00000076716;ENSG00000076864;ENSG00000077782;ENSG00000077942;ENSG00000087494;ENSG00000088992;ENSG00000091129;ENSG00000092929;ENSG00000095970;ENSG00000100985;ENSG00000102359;ENSG00000102837;ENSG00000104435;ENSG00000104951;ENSG00000105894;ENSG00000106541;ENSG00000107984;ENSG00000109861;ENSG00000111206…
GO:0010035	response to inorganic substance	29	572	7.1776285404138e-05	0.00291855042856532	ENSG00000005421;ENSG00000019505;ENSG00000051180;ENSG00000085491;ENSG00000085662;ENSG00000096433;ENSG00000100985;ENSG00000104419;ENSG00000109846;ENSG00000114346;ENSG00000130649;ENSG00000132965;ENSG00000134057;ENSG00000140505;ENSG00000143546;ENSG00000145386;ENSG00000145708;ENSG00000148344;ENSG00000160182;ENSG00000160211;ENSG00000164761;ENSG00000165168;ENSG00000169715;ENSG00000170312;ENSG00000176170…
GO:0019373	epoxygenase P450 pathway	5	20	7.5711143497104e-05	0.00305607754408018	ENSG00000130649;ENSG00000140505;ENSG00000167600;ENSG00000197838;ENSG00000198077
GO:0002283	neutrophil activation involved in immune response	26	488	7.63298462738326e-05	0.00305872499923402	ENSG00000011422;ENSG00000051523;ENSG00000067225;ENSG00000092929;ENSG00000100985;ENSG00000102837;ENSG00000106348;ENSG00000109861;ENSG00000122861;ENSG00000133063;ENSG00000141524;ENSG00000143226;ENSG00000143546;ENSG00000149925;ENSG00000153395;ENSG00000158869;ENSG00000163191;ENSG00000163220;ENSG00000163687;ENSG00000163739;ENSG00000163993;ENSG00000164687;ENSG00000165168;ENSG00000169896;ENSG00000173110…
GO:1901568	fatty acid derivative metabolic process	14	180	8.03897710322036e-05	0.00319824053099342	ENSG00000005421;ENSG00000083807;ENSG00000085662;ENSG00000103222;ENSG00000130649;ENSG00000132965;ENSG00000140505;ENSG00000148344;ENSG00000164181;ENSG00000164687;ENSG00000167600;ENSG00000179593;ENSG00000197838;ENSG00000198077
GO:0006007	glucose catabolic process	6	32	8.0991160783011e-05	0.00319915085092894	ENSG00000067057;ENSG00000067225;ENSG00000074800;ENSG00000111674;ENSG00000149925;ENSG00000159399
GO:0045933	positive regulation of muscle contraction	7	46	8.3436340636916e-05	0.00327236144483791	ENSG00000053918;ENSG00000074800;ENSG00000100604;ENSG00000116741;ENSG00000164171;ENSG00000168743;ENSG00000176170
GO:0045786	negative regulation of cell cycle	30	610	9.30978109114449e-05	0.00362556967845275	ENSG00000051180;ENSG00000054598;ENSG00000068489;ENSG00000071539;ENSG00000075218;ENSG00000080986;ENSG00000085840;ENSG00000093009;ENSG00000094804;ENSG00000111206;ENSG00000112742;ENSG00000117399;ENSG00000117650;ENSG00000117724;ENSG00000124766;ENSG00000128342;ENSG00000134057;ENSG00000147889;ENSG00000156970;ENSG00000164109;ENSG00000164611;ENSG00000166851;ENSG00000167513;ENSG00000169429;ENSG00000169679…
GO:0019884	antigen processing and presentation of exogenous antigen	14	183	9.60024340508206e-05	0.00371254168042684	ENSG00000051523;ENSG00000090889;ENSG00000116701;ENSG00000129354;ENSG00000136943;ENSG00000137807;ENSG00000138160;ENSG00000142945;ENSG00000158869;ENSG00000161800;ENSG00000165168;ENSG00000196188;ENSG00000204252;ENSG00000232629
GO:0035295	tube development	44	1047	9.69355491486626e-05	0.00372259435272295	ENSG00000005884;ENSG00000007062;ENSG00000041982;ENSG00000054598;ENSG00000067225;ENSG00000085662;ENSG00000087245;ENSG00000091129;ENSG00000102359;ENSG00000105894;ENSG00000106541;ENSG00000110195;ENSG00000112655;ENSG00000113083;ENSG00000117525;ENSG00000120057;ENSG00000124664;ENSG00000124766;ENSG00000128342;ENSG00000129654;ENSG00000134057;ENSG00000137573;ENSG00000140505;ENSG00000141756;ENSG00000143125…
GO:0033559	unsaturated fatty acid metabolic process	11	120	0.000108987174617593	0.00415654534920891	ENSG00000085662;ENSG00000130649;ENSG00000132965;ENSG00000140505;ENSG00000148344;ENSG00000164181;ENSG00000164687;ENSG00000167600;ENSG00000179593;ENSG00000197838;ENSG00000198077
GO:0002444	myeloid leukocyte mediated immunity	28	557	0.000110376987906483	0.00418071741864968	ENSG00000011422;ENSG00000051523;ENSG00000067225;ENSG00000092929;ENSG00000100604;ENSG00000100985;ENSG00000102837;ENSG00000106348;ENSG00000109861;ENSG00000122861;ENSG00000133063;ENSG00000141524;ENSG00000143226;ENSG00000143546;ENSG00000145920;ENSG00000149925;ENSG00000153395;ENSG00000158869;ENSG00000163191;ENSG00000163220;ENSG00000163687;ENSG00000163739;ENSG00000163993;ENSG00000164687;ENSG00000165168…
GO:0031589	cell-substrate adhesion	21	361	0.000111911018264701	0.00420998592519589	ENSG00000005884;ENSG00000077942;ENSG00000091136;ENSG00000092445;ENSG00000092929;ENSG00000102837;ENSG00000105894;ENSG00000106541;ENSG00000122861;ENSG00000132470;ENSG00000133110;ENSG00000147889;ENSG00000151882;ENSG00000155760;ENSG00000157227;ENSG00000164171;ENSG00000164176;ENSG00000168743;ENSG00000184292;ENSG00000204580;ENSG00000262406
GO:0002446	neutrophil mediated immunity	26	500	0.000113113288018669	0.00422646272123811	ENSG00000011422;ENSG00000051523;ENSG00000067225;ENSG00000092929;ENSG00000100985;ENSG00000102837;ENSG00000106348;ENSG00000109861;ENSG00000122861;ENSG00000133063;ENSG00000141524;ENSG00000143226;ENSG00000143546;ENSG00000149925;ENSG00000153395;ENSG00000158869;ENSG00000163191;ENSG00000163220;ENSG00000163687;ENSG00000163739;ENSG00000163993;ENSG00000164687;ENSG00000165168;ENSG00000169896;ENSG00000173110…
GO:0000912	assembly of actomyosin apparatus involved in cytokinesis	3	5	0.000119189141941831	0.00439410636625551	ENSG00000011426;ENSG00000114346;ENSG00000161800
GO:0000915	actomyosin contractile ring assembly	3	5	0.000119189141941831	0.00439410636625551	ENSG00000011426;ENSG00000114346;ENSG00000161800
GO:0007077	mitotic nuclear envelope disassembly	4	12	0.000121187145791538	0.00440897971202108	ENSG00000134057;ENSG00000157456;ENSG00000166851;ENSG00000170312
GO:0051255	spindle midzone assembly	4	12	0.000121187145791538	0.00440897971202108	ENSG00000090889;ENSG00000137807;ENSG00000161800;ENSG00000178999
GO:0061640	cytoskeleton-dependent cytokinesis	10	102	0.000127403946748268	0.00460486160469231	ENSG00000011426;ENSG00000090889;ENSG00000112984;ENSG00000114346;ENSG00000115163;ENSG00000137807;ENSG00000138180;ENSG00000161800;ENSG00000166851;ENSG00000178999
GO:0001655	urogenital system development	20	338	0.000129161867086453	0.00463808522719537	ENSG00000005884;ENSG00000007062;ENSG00000041982;ENSG00000054598;ENSG00000085662;ENSG00000100985;ENSG00000112655;ENSG00000117724;ENSG00000122870;ENSG00000124766;ENSG00000128342;ENSG00000129654;ENSG00000137573;ENSG00000140297;ENSG00000157483;ENSG00000168743;ENSG00000179593;ENSG00000184292;ENSG00000260027;ENSG00000272398
GO:0032502	developmental process	185	6430	0.000133801075742447	0.00477367708939181	ENSG00000005884;ENSG00000006611;ENSG00000007062;ENSG00000011028;ENSG00000013810;ENSG00000021300;ENSG00000038427;ENSG00000041982;ENSG00000046604;ENSG00000049089;ENSG00000049130;ENSG00000053918;ENSG00000054598;ENSG00000058085;ENSG00000067225;ENSG00000069011;ENSG00000071539;ENSG00000076716;ENSG00000076864;ENSG00000077782;ENSG00000077942;ENSG00000079462;ENSG00000080293;ENSG00000085662;ENSG00000087245…
GO:0051240	positive regulation of multicellular organismal process	66	1812	0.000135372950576496	0.00479144540074782	ENSG00000005884;ENSG00000007062;ENSG00000049130;ENSG00000051523;ENSG00000053918;ENSG00000054598;ENSG00000067225;ENSG00000074800;ENSG00000077782;ENSG00000088992;ENSG00000091129;ENSG00000095970;ENSG00000100604;ENSG00000100985;ENSG00000102359;ENSG00000104435;ENSG00000104951;ENSG00000105894;ENSG00000107984;ENSG00000112655;ENSG00000113758;ENSG00000114346;ENSG00000116741;ENSG00000117122;ENSG00000117399…
GO:0006721	terpenoid metabolic process	11	123	0.000136031994198446	0.00479144540074782	ENSG00000076716;ENSG00000085662;ENSG00000106258;ENSG00000114113;ENSG00000130649;ENSG00000139547;ENSG00000140505;ENSG00000143320;ENSG00000160868;ENSG00000167600;ENSG00000227471
GO:0006950	response to stress	132	4297	0.000147915940618945	0.00517705792166308	ENSG00000011422;ENSG00000041982;ENSG00000051180;ENSG00000051523;ENSG00000054179;ENSG00000071539;ENSG00000074800;ENSG00000075218;ENSG00000077942;ENSG00000080293;ENSG00000085491;ENSG00000085662;ENSG00000087245;ENSG00000087494;ENSG00000092445;ENSG00000092929;ENSG00000093009;ENSG00000095970;ENSG00000096088;ENSG00000096433;ENSG00000100604;ENSG00000100985;ENSG00000101443;ENSG00000102034;ENSG00000103222…
GO:0043299	leukocyte degranulation	27	538	0.000150168284042969	0.00522283402992214	ENSG00000011422;ENSG00000051523;ENSG00000067225;ENSG00000092929;ENSG00000100604;ENSG00000100985;ENSG00000102837;ENSG00000106348;ENSG00000109861;ENSG00000122861;ENSG00000133063;ENSG00000141524;ENSG00000143226;ENSG00000143546;ENSG00000145920;ENSG00000149925;ENSG00000153395;ENSG00000158869;ENSG00000163191;ENSG00000163220;ENSG00000163739;ENSG00000163993;ENSG00000164687;ENSG00000165168;ENSG00000169896…
GO:0043312	neutrophil degranulation	25	483	0.000164121779897536	0.0056724590177086	ENSG00000011422;ENSG00000051523;ENSG00000067225;ENSG00000092929;ENSG00000100985;ENSG00000102837;ENSG00000106348;ENSG00000109861;ENSG00000122861;ENSG00000133063;ENSG00000141524;ENSG00000143226;ENSG00000143546;ENSG00000149925;ENSG00000153395;ENSG00000158869;ENSG00000163191;ENSG00000163220;ENSG00000163739;ENSG00000163993;ENSG00000164687;ENSG00000165168;ENSG00000169896;ENSG00000173110;ENSG00000275896
GO:0045597	positive regulation of cell differentiation	42	1008	0.00016907934703863	0.00580750800697902	ENSG00000005884;ENSG00000007062;ENSG00000049130;ENSG00000054598;ENSG00000077782;ENSG00000088992;ENSG00000091129;ENSG00000092929;ENSG00000095970;ENSG00000102837;ENSG00000104435;ENSG00000104951;ENSG00000105894;ENSG00000112655;ENSG00000113758;ENSG00000114346;ENSG00000116741;ENSG00000124664;ENSG00000124766;ENSG00000128342;ENSG00000129654;ENSG00000130427;ENSG00000131389;ENSG00000137285;ENSG00000143320…
GO:0040008	regulation of growth	31	662	0.000171974338300172	0.00587048204197501	ENSG00000051523;ENSG00000054598;ENSG00000074800;ENSG00000091129;ENSG00000106541;ENSG00000109846;ENSG00000111206;ENSG00000113758;ENSG00000116741;ENSG00000118785;ENSG00000128422;ENSG00000130829;ENSG00000134057;ENSG00000143320;ENSG00000143546;ENSG00000147889;ENSG00000157227;ENSG00000157456;ENSG00000160211;ENSG00000163220;ENSG00000163931;ENSG00000169715;ENSG00000170312;ENSG00000175793;ENSG00000176170…
GO:0001822	kidney development	18	293	0.000175396938832086	0.00595058326221739	ENSG00000005884;ENSG00000007062;ENSG00000054598;ENSG00000085662;ENSG00000100985;ENSG00000112655;ENSG00000117724;ENSG00000122870;ENSG00000124766;ENSG00000128342;ENSG00000129654;ENSG00000137573;ENSG00000140297;ENSG00000157483;ENSG00000168743;ENSG00000184292;ENSG00000260027;ENSG00000272398
GO:2000026	regulation of multicellular organismal development	74	2116	0.000179571197076337	0.00605505316970821	ENSG00000005884;ENSG00000007062;ENSG00000049130;ENSG00000054598;ENSG00000067225;ENSG00000076716;ENSG00000076864;ENSG00000077782;ENSG00000087494;ENSG00000088992;ENSG00000091129;ENSG00000095970;ENSG00000100985;ENSG00000102359;ENSG00000104435;ENSG00000104951;ENSG00000105894;ENSG00000107984;ENSG00000109861;ENSG00000112655;ENSG00000113083;ENSG00000113758;ENSG00000114346;ENSG00000116741;ENSG00000117399…
GO:0032501	multicellular organismal process	216	7767	0.000182220146088438	0.00609774764087187	ENSG00000005884;ENSG00000006611;ENSG00000007062;ENSG00000011028;ENSG00000011422;ENSG00000011426;ENSG00000013810;ENSG00000021300;ENSG00000038427;ENSG00000041982;ENSG00000046604;ENSG00000049089;ENSG00000049130;ENSG00000051523;ENSG00000053918;ENSG00000054179;ENSG00000054598;ENSG00000058085;ENSG00000067225;ENSG00000069011;ENSG00000069849;ENSG00000070087;ENSG00000071539;ENSG00000074800;ENSG00000075461…
GO:0031145	anaphase-promoting complex-dependent catabolic process	9	87	0.00018304269591044	0.00609774764087187	ENSG00000117399;ENSG00000134057;ENSG00000156970;ENSG00000164109;ENSG00000164611;ENSG00000166851;ENSG00000170312;ENSG00000175063;ENSG00000178999
GO:0001523	retinoid metabolic process	10	107	0.000189715021476284	0.00628218005247814	ENSG00000076716;ENSG00000085662;ENSG00000106258;ENSG00000114113;ENSG00000139547;ENSG00000140505;ENSG00000143320;ENSG00000160868;ENSG00000167600;ENSG00000227471
GO:0072010	glomerular epithelium development	5	24	0.000192302019755231	0.0063299414836097	ENSG00000007062;ENSG00000054598;ENSG00000129654;ENSG00000157483;ENSG00000272398
GO:0002443	leukocyte mediated immunity	38	886	0.000196966278191649	0.0064451095763303	ENSG00000011422;ENSG00000051523;ENSG00000067225;ENSG00000092929;ENSG00000100604;ENSG00000100985;ENSG00000102837;ENSG00000104951;ENSG00000106123;ENSG00000106348;ENSG00000109861;ENSG00000122861;ENSG00000129654;ENSG00000133063;ENSG00000135077;ENSG00000141524;ENSG00000143226;ENSG00000143546;ENSG00000145920;ENSG00000149925;ENSG00000150782;ENSG00000153395;ENSG00000158869;ENSG00000163191;ENSG00000163220…
GO:0048856	anatomical structure development	174	6022	0.000207021453804875	0.0067219275105997	ENSG00000005884;ENSG00000006611;ENSG00000007062;ENSG00000013810;ENSG00000021300;ENSG00000038427;ENSG00000041982;ENSG00000046604;ENSG00000049089;ENSG00000049130;ENSG00000053918;ENSG00000054598;ENSG00000058085;ENSG00000067225;ENSG00000069011;ENSG00000071539;ENSG00000076716;ENSG00000076864;ENSG00000077782;ENSG00000077942;ENSG00000079462;ENSG00000080293;ENSG00000085662;ENSG00000087245;ENSG00000087494…
GO:0009435	NAD biosynthetic process	7	53	0.000209072609732938	0.0067219275105997	ENSG00000067057;ENSG00000067225;ENSG00000074800;ENSG00000111674;ENSG00000149925;ENSG00000159399;ENSG00000204653
GO:0010458	exit from mitosis	7	53	0.000209072609732938	0.0067219275105997	ENSG00000011426;ENSG00000117399;ENSG00000117650;ENSG00000146670;ENSG00000156970;ENSG00000164109;ENSG00000175063
GO:0033043	regulation of organelle organization	52	1354	0.000216075653831143	0.00690692696928451	ENSG00000011422;ENSG00000011426;ENSG00000013810;ENSG00000034510;ENSG00000070087;ENSG00000071539;ENSG00000074800;ENSG00000075618;ENSG00000077274;ENSG00000080986;ENSG00000088325;ENSG00000093009;ENSG00000094804;ENSG00000095970;ENSG00000100985;ENSG00000104341;ENSG00000104435;ENSG00000111674;ENSG00000112742;ENSG00000113758;ENSG00000114346;ENSG00000117399;ENSG00000117650;ENSG00000117724;ENSG00000126787…
GO:0032506	cytokinetic process	6	38	0.000219435516397325	0.00697401382573108	ENSG00000011426;ENSG00000112984;ENSG00000114346;ENSG00000138180;ENSG00000161800;ENSG00000178999
GO:1905039	carboxylic acid transmembrane transport	12	152	0.00022351283899802	0.00706300571233743	ENSG00000083807;ENSG00000092068;ENSG00000103222;ENSG00000105281;ENSG00000110195;ENSG00000111371;ENSG00000116741;ENSG00000117394;ENSG00000131389;ENSG00000139514;ENSG00000141526;ENSG00000151365
GO:0016098	monoterpenoid metabolic process	3	6	0.000234275733703281	0.00731946218858273	ENSG00000130649;ENSG00000140505;ENSG00000160868
GO:0044837	actomyosin contractile ring organization	3	6	0.000234275733703281	0.00731946218858273	ENSG00000011426;ENSG00000114346;ENSG00000161800
GO:1903046	meiotic cell cycle process	14	200	0.000244140222853305	0.00758480579988078	ENSG00000051180;ENSG00000071539;ENSG00000105173;ENSG00000112742;ENSG00000117399;ENSG00000128342;ENSG00000131747;ENSG00000143228;ENSG00000156970;ENSG00000157456;ENSG00000164045;ENSG00000164611;ENSG00000166851;ENSG00000169679
GO:1903825	organic acid transmembrane transport	12	154	0.000252373024319484	0.00779677555579189	ENSG00000083807;ENSG00000092068;ENSG00000103222;ENSG00000105281;ENSG00000110195;ENSG00000111371;ENSG00000116741;ENSG00000117394;ENSG00000131389;ENSG00000139514;ENSG00000141526;ENSG00000151365
GO:0072001	renal system development	18	302	0.000254265290795333	0.00781159476721219	ENSG00000005884;ENSG00000007062;ENSG00000054598;ENSG00000085662;ENSG00000100985;ENSG00000112655;ENSG00000117724;ENSG00000122870;ENSG00000124766;ENSG00000128342;ENSG00000129654;ENSG00000137573;ENSG00000140297;ENSG00000157483;ENSG00000168743;ENSG00000184292;ENSG00000260027;ENSG00000272398
GO:0032103	positive regulation of response to external stimulus	19	329	0.000257816426243125	0.0078541164992322	ENSG00000051523;ENSG00000077782;ENSG00000095970;ENSG00000096088;ENSG00000103222;ENSG00000105894;ENSG00000109861;ENSG00000117525;ENSG00000132965;ENSG00000135077;ENSG00000137285;ENSG00000143546;ENSG00000145623;ENSG00000146070;ENSG00000150782;ENSG00000163220;ENSG00000164171;ENSG00000169429;ENSG00000198535
GO:0009888	tissue development	72	2069	0.000258489910101313	0.0078541164992322	ENSG00000005884;ENSG00000006611;ENSG00000007062;ENSG00000041982;ENSG00000046604;ENSG00000049130;ENSG00000054598;ENSG00000058085;ENSG00000069011;ENSG00000076716;ENSG00000077782;ENSG00000085662;ENSG00000087245;ENSG00000087494;ENSG00000091136;ENSG00000100985;ENSG00000105894;ENSG00000106541;ENSG00000107159;ENSG00000107984;ENSG00000110195;ENSG00000112655;ENSG00000113083;ENSG00000113739;ENSG00000114113…
GO:0032879	regulation of localization	91	2772	0.000268881337550856	0.00812521200358598	ENSG00000005421;ENSG00000005448;ENSG00000005884;ENSG00000019505;ENSG00000034510;ENSG00000046604;ENSG00000049130;ENSG00000051523;ENSG00000053918;ENSG00000058085;ENSG00000069849;ENSG00000070087;ENSG00000075218;ENSG00000075461;ENSG00000076716;ENSG00000077782;ENSG00000077942;ENSG00000080986;ENSG00000088992;ENSG00000089356;ENSG00000089685;ENSG00000091136;ENSG00000092929;ENSG00000095970;ENSG00000096433…
GO:0045132	meiotic chromosome segregation	9	92	0.000280111060334609	0.00841855523723036	ENSG00000071539;ENSG00000105173;ENSG00000112742;ENSG00000131747;ENSG00000143228;ENSG00000156970;ENSG00000164611;ENSG00000166851;ENSG00000169679
GO:0030324	lung development	13	179	0.000282577482451636	0.00844677555652728	ENSG00000005884;ENSG00000041982;ENSG00000105894;ENSG00000106541;ENSG00000112655;ENSG00000113083;ENSG00000124664;ENSG00000128342;ENSG00000129654;ENSG00000140505;ENSG00000157227;ENSG00000167972;ENSG00000262406
GO:0045606	positive regulation of epidermal cell differentiation	5	26	0.000286480246052042	0.0084718489875283	ENSG00000054598;ENSG00000175793;ENSG00000175832;ENSG00000179593;ENSG00000221926
GO:0046697	decidualization	5	26	0.000286480246052042	0.0084718489875283	ENSG00000105894;ENSG00000113739;ENSG00000118785;ENSG00000128342;ENSG00000136943
GO:0044839	cell cycle G2/M phase transition	17	279	0.000290301181076651	0.00853917835826533	ENSG00000006611;ENSG00000075218;ENSG00000085840;ENSG00000088325;ENSG00000094804;ENSG00000111206;ENSG00000117650;ENSG00000117724;ENSG00000134057;ENSG00000145386;ENSG00000147889;ENSG00000157456;ENSG00000164045;ENSG00000165304;ENSG00000166851;ENSG00000170312;ENSG00000178999
GO:0016101	diterpenoid metabolic process	10	113	0.00029652161629523	0.00867600284715673	ENSG00000076716;ENSG00000085662;ENSG00000106258;ENSG00000114113;ENSG00000139547;ENSG00000140505;ENSG00000143320;ENSG00000160868;ENSG00000167600;ENSG00000227471
GO:0045931	positive regulation of mitotic cell cycle	12	157	0.000301575197147882	0.00877742547488309	ENSG00000080986;ENSG00000094804;ENSG00000126787;ENSG00000134057;ENSG00000146670;ENSG00000164045;ENSG00000164109;ENSG00000167513;ENSG00000170312;ENSG00000175063;ENSG00000176170;ENSG00000178999
GO:0043385	mycotoxin metabolic process	4	15	0.000316235644379883	0.00892236282357527	ENSG00000106258;ENSG00000140505;ENSG00000160868;ENSG00000197838
GO:0046222	aflatoxin metabolic process	4	15	0.000316235644379883	0.00892236282357527	ENSG00000106258;ENSG00000140505;ENSG00000160868;ENSG00000197838
GO:0090231	regulation of spindle checkpoint	4	15	0.000316235644379883	0.00892236282357527	ENSG00000080986;ENSG00000134057;ENSG00000164109;ENSG00000167513
GO:0090266	regulation of mitotic cell cycle spindle assembly checkpoint	4	15	0.000316235644379883	0.00892236282357527	ENSG00000080986;ENSG00000134057;ENSG00000164109;ENSG00000167513
GO:1901376	organic heteropentacyclic compound metabolic process	4	15	0.000316235644379883	0.00892236282357527	ENSG00000106258;ENSG00000140505;ENSG00000160868;ENSG00000197838
GO:1903504	regulation of mitotic spindle checkpoint	4	15	0.000316235644379883	0.00892236282357527	ENSG00000080986;ENSG00000134057;ENSG00000164109;ENSG00000167513
GO:0044843	cell cycle G1/S phase transition	16	256	0.000328052484389527	0.00918255749715828	ENSG00000075218;ENSG00000085840;ENSG00000093009;ENSG00000094804;ENSG00000105173;ENSG00000124766;ENSG00000134057;ENSG00000141934;ENSG00000145386;ENSG00000147889;ENSG00000164045;ENSG00000167513;ENSG00000170312;ENSG00000175793;ENSG00000185499;ENSG00000206557
GO:0034502	protein localization to chromosome	9	94	0.000329327591656785	0.00918255749715828	ENSG00000080986;ENSG00000112742;ENSG00000115163;ENSG00000146670;ENSG00000156970;ENSG00000166851;ENSG00000167513;ENSG00000170312;ENSG00000178999
GO:0060541	respiratory system development	14	206	0.000330439230006238	0.00918255749715828	ENSG00000005884;ENSG00000041982;ENSG00000105894;ENSG00000106541;ENSG00000112655;ENSG00000113083;ENSG00000124664;ENSG00000128342;ENSG00000129654;ENSG00000140505;ENSG00000157227;ENSG00000167972;ENSG00000178860;ENSG00000262406
GO:0007076	mitotic chromosome condensation	6	41	0.000337085519879523	0.00927404440265552	ENSG00000109805;ENSG00000121152;ENSG00000134057;ENSG00000146670;ENSG00000166851;ENSG00000170312
GO:0045684	positive regulation of epidermis development	6	41	0.000337085519879523	0.00927404440265552	ENSG00000054598;ENSG00000128422;ENSG00000175793;ENSG00000175832;ENSG00000179593;ENSG00000221926
GO:0030323	respiratory tube development	13	183	0.000350100017249123	0.0095844212642953	ENSG00000005884;ENSG00000041982;ENSG00000105894;ENSG00000106541;ENSG00000112655;ENSG00000113083;ENSG00000124664;ENSG00000128342;ENSG00000129654;ENSG00000140505;ENSG00000157227;ENSG00000167972;ENSG00000262406
GO:0000079	regulation of cyclin-dependent protein serine/threonine kinase activity	9	95	0.000356491353455853	0.0097113161803491	ENSG00000094804;ENSG00000105173;ENSG00000134057;ENSG00000145386;ENSG00000147889;ENSG00000157456;ENSG00000164045;ENSG00000166851;ENSG00000175793
GO:0002366	leukocyte activation involved in immune response	32	722	0.00035960713269227	0.00974817374406005	ENSG00000011422;ENSG00000051523;ENSG00000067225;ENSG00000092929;ENSG00000095970;ENSG00000100604;ENSG00000100985;ENSG00000102837;ENSG00000106348;ENSG00000109861;ENSG00000122861;ENSG00000133063;ENSG00000135077;ENSG00000141524;ENSG00000143226;ENSG00000143546;ENSG00000145920;ENSG00000149925;ENSG00000150782;ENSG00000153395;ENSG00000158869;ENSG00000163191;ENSG00000163220;ENSG00000163687;ENSG00000163739…
GO:0016043	cellular component organization	190	6748	0.00036469948008282	0.00983799085296583	ENSG00000005448;ENSG00000005884;ENSG00000006611;ENSG00000011422;ENSG00000011426;ENSG00000013810;ENSG00000019505;ENSG00000034510;ENSG00000038427;ENSG00000041982;ENSG00000046604;ENSG00000049089;ENSG00000051180;ENSG00000051523;ENSG00000054598;ENSG00000058085;ENSG00000070087;ENSG00000071539;ENSG00000074800;ENSG00000075461;ENSG00000075618;ENSG00000076716;ENSG00000076864;ENSG00000077274;ENSG00000077942…
GO:0009790	embryo development	42	1046	0.00036799538814351	0.00985727967347631	ENSG00000005884;ENSG00000006611;ENSG00000049130;ENSG00000054598;ENSG00000069011;ENSG00000077782;ENSG00000087245;ENSG00000091136;ENSG00000100985;ENSG00000101003;ENSG00000107984;ENSG00000110195;ENSG00000112559;ENSG00000112655;ENSG00000113758;ENSG00000117122;ENSG00000117650;ENSG00000124766;ENSG00000128342;ENSG00000131747;ENSG00000132470;ENSG00000134057;ENSG00000137285;ENSG00000137573;ENSG00000141756…
GO:0140013	meiotic nuclear division	13	184	0.000368979546547848	0.00985727967347631	ENSG00000051180;ENSG00000071539;ENSG00000105173;ENSG00000112742;ENSG00000117399;ENSG00000128342;ENSG00000131747;ENSG00000143228;ENSG00000156970;ENSG00000157456;ENSG00000164611;ENSG00000166851;ENSG00000169679
GO:0051321	meiotic cell cycle	16	259	0.000373308951879692	0.00992499280718604	ENSG00000051180;ENSG00000071539;ENSG00000105173;ENSG00000112742;ENSG00000117399;ENSG00000117650;ENSG00000128342;ENSG00000131747;ENSG00000143228;ENSG00000156970;ENSG00000157456;ENSG00000164045;ENSG00000164611;ENSG00000166851;ENSG00000169679;ENSG00000174371
GO:0051098	regulation of binding	20	367	0.000380409586447648	0.0100653828375861	ENSG00000005421;ENSG00000011422;ENSG00000054598;ENSG00000076864;ENSG00000100985;ENSG00000106123;ENSG00000107984;ENSG00000112559;ENSG00000113083;ENSG00000117650;ENSG00000123485;ENSG00000128342;ENSG00000146670;ENSG00000153071;ENSG00000164171;ENSG00000164932;ENSG00000166851;ENSG00000167513;ENSG00000172425;ENSG00000178999
GO:0002263	cell activation involved in immune response	32	726	0.000395689411582749	0.010419821171679	ENSG00000011422;ENSG00000051523;ENSG00000067225;ENSG00000092929;ENSG00000095970;ENSG00000100604;ENSG00000100985;ENSG00000102837;ENSG00000106348;ENSG00000109861;ENSG00000122861;ENSG00000133063;ENSG00000135077;ENSG00000141524;ENSG00000143226;ENSG00000143546;ENSG00000145920;ENSG00000149925;ENSG00000150782;ENSG00000153395;ENSG00000158869;ENSG00000163191;ENSG00000163220;ENSG00000163687;ENSG00000163739…
GO:0002933	lipid hydroxylation	3	7	0.000402934657024656	0.0104760728469666	ENSG00000106258;ENSG00000130649;ENSG00000160868
GO:0009820	alkaloid metabolic process	3	7	0.000402934657024656	0.0104760728469666	ENSG00000106258;ENSG00000140505;ENSG00000160868
GO:0019674	NAD metabolic process	8	77	0.000403508773309924	0.0104760728469666	ENSG00000067057;ENSG00000067225;ENSG00000074800;ENSG00000111674;ENSG00000149925;ENSG00000159399;ENSG00000181019;ENSG00000204653
GO:0000086	G2/M transition of mitotic cell cycle	16	261	0.000406385022553488	0.0105012144201071	ENSG00000006611;ENSG00000085840;ENSG00000088325;ENSG00000094804;ENSG00000111206;ENSG00000117650;ENSG00000117724;ENSG00000134057;ENSG00000145386;ENSG00000147889;ENSG00000157456;ENSG00000164045;ENSG00000165304;ENSG00000166851;ENSG00000170312;ENSG00000178999
GO:0007143	female meiotic nuclear division	5	28	0.00041203248793276	0.0105012144201071	ENSG00000071539;ENSG00000112742;ENSG00000131747;ENSG00000157456;ENSG00000166851
GO:1904666	regulation of ubiquitin protein ligase activity	5	28	0.00041203248793276	0.0105012144201071	ENSG00000117399;ENSG00000147889;ENSG00000164109;ENSG00000166851;ENSG00000175063
GO:0030397	membrane disassembly	4	16	0.000413971924698616	0.0105012144201071	ENSG00000134057;ENSG00000157456;ENSG00000166851;ENSG00000170312
GO:0051081	nuclear envelope disassembly	4	16	0.000413971924698616	0.0105012144201071	ENSG00000134057;ENSG00000157456;ENSG00000166851;ENSG00000170312
GO:0050896	response to stimulus	249	9291	0.000418734859762498	0.0105304330801193	ENSG00000005421;ENSG00000005448;ENSG00000005884;ENSG00000011422;ENSG00000019505;ENSG00000021300;ENSG00000035499;ENSG00000041982;ENSG00000049130;ENSG00000051180;ENSG00000051523;ENSG00000053918;ENSG00000054179;ENSG00000054598;ENSG00000058085;ENSG00000067057;ENSG00000067225;ENSG00000071539;ENSG00000074800;ENSG00000075218;ENSG00000075461;ENSG00000075618;ENSG00000076716;ENSG00000076864;ENSG00000077782…
GO:0019882	antigen processing and presentation	15	236	0.000418932238268761	0.0105304330801193	ENSG00000051523;ENSG00000090889;ENSG00000095970;ENSG00000116701;ENSG00000129354;ENSG00000136943;ENSG00000137807;ENSG00000138160;ENSG00000142945;ENSG00000158869;ENSG00000161800;ENSG00000165168;ENSG00000196188;ENSG00000204252;ENSG00000232629
GO:1901700	response to oxygen-containing compound	60	1673	0.000424248925695438	0.01061582153437	ENSG00000005421;ENSG00000041982;ENSG00000051180;ENSG00000051523;ENSG00000053918;ENSG00000067225;ENSG00000075461;ENSG00000085662;ENSG00000087245;ENSG00000088992;ENSG00000089685;ENSG00000094804;ENSG00000095970;ENSG00000100985;ENSG00000103222;ENSG00000105894;ENSG00000107159;ENSG00000109846;ENSG00000110195;ENSG00000111713;ENSG00000112655;ENSG00000113739;ENSG00000114346;ENSG00000116741;ENSG00000117394…
GO:0010639	negative regulation of organelle organization	22	427	0.000426746057374934	0.0106302058436189	ENSG00000034510;ENSG00000070087;ENSG00000071539;ENSG00000080986;ENSG00000088325;ENSG00000104435;ENSG00000112742;ENSG00000117399;ENSG00000117650;ENSG00000117724;ENSG00000128342;ENSG00000131747;ENSG00000134057;ENSG00000137309;ENSG00000156970;ENSG00000164109;ENSG00000164611;ENSG00000166851;ENSG00000167513;ENSG00000169679;ENSG00000178999;ENSG00000184292
GO:0022411	cellular component disassembly	27	575	0.000430618845426992	0.0106785749561043	ENSG00000075618;ENSG00000087245;ENSG00000088325;ENSG00000095970;ENSG00000100985;ENSG00000104435;ENSG00000107984;ENSG00000131747;ENSG00000134057;ENSG00000136943;ENSG00000137309;ENSG00000137673;ENSG00000142945;ENSG00000147889;ENSG00000157227;ENSG00000157456;ENSG00000159399;ENSG00000163687;ENSG00000166851;ENSG00000169896;ENSG00000170312;ENSG00000186185;ENSG00000196611;ENSG00000204580;ENSG00000214253…
GO:0051248	negative regulation of protein metabolic process	44	1123	0.000447659641592286	0.011048086803059	ENSG00000011422;ENSG00000077942;ENSG00000088992;ENSG00000089685;ENSG00000100985;ENSG00000101443;ENSG00000104341;ENSG00000105894;ENSG00000107984;ENSG00000109846;ENSG00000111206;ENSG00000116741;ENSG00000117525;ENSG00000118849;ENSG00000123243;ENSG00000124102;ENSG00000124225;ENSG00000124766;ENSG00000126259;ENSG00000128342;ENSG00000130829;ENSG00000134057;ENSG00000135549;ENSG00000147889;ENSG00000153233…
GO:0001704	formation of primary germ layer	10	119	0.000449515285838749	0.011048086803059	ENSG00000005884;ENSG00000054598;ENSG00000087245;ENSG00000091136;ENSG00000100985;ENSG00000107984;ENSG00000132470;ENSG00000155760;ENSG00000157227;ENSG00000164171
GO:0009605	response to external stimulus	88	2704	0.000464861193908639	0.0113747008951981	ENSG00000005421;ENSG00000011422;ENSG00000021300;ENSG00000041982;ENSG00000051523;ENSG00000058085;ENSG00000074800;ENSG00000076864;ENSG00000077782;ENSG00000080293;ENSG00000087494;ENSG00000090104;ENSG00000091129;ENSG00000092445;ENSG00000092929;ENSG00000095970;ENSG00000096088;ENSG00000100604;ENSG00000100985;ENSG00000101443;ENSG00000102007;ENSG00000103222;ENSG00000105894;ENSG00000109861;ENSG00000110195…
GO:0048518	positive regulation of biological process	180	6360	0.00046838360870632	0.0114104024499822	ENSG00000005001;ENSG00000005421;ENSG00000005884;ENSG00000007062;ENSG00000011422;ENSG00000011426;ENSG00000035499;ENSG00000041982;ENSG00000046774;ENSG00000049130;ENSG00000051180;ENSG00000051523;ENSG00000053918;ENSG00000054598;ENSG00000058085;ENSG00000067225;ENSG00000069011;ENSG00000069849;ENSG00000070087;ENSG00000074800;ENSG00000075218;ENSG00000075461;ENSG00000075618;ENSG00000077782;ENSG00000077942…
GO:1904029	regulation of cyclin-dependent protein kinase activity	9	99	0.000484308995189792	0.0117466172956121	ENSG00000094804;ENSG00000105173;ENSG00000134057;ENSG00000145386;ENSG00000147889;ENSG00000157456;ENSG00000164045;ENSG00000166851;ENSG00000175793
GO:0019369	arachidonic acid metabolic process	7	61	0.000504945672559301	0.0121450164745708	ENSG00000130649;ENSG00000140505;ENSG00000148344;ENSG00000167600;ENSG00000179593;ENSG00000197838;ENSG00000198077
GO:0072006	nephron development	11	143	0.00050512726747763	0.0121450164745708	ENSG00000005884;ENSG00000007062;ENSG00000054598;ENSG00000128342;ENSG00000129654;ENSG00000137573;ENSG00000157483;ENSG00000168743;ENSG00000184292;ENSG00000260027;ENSG00000272398
GO:0045785	positive regulation of cell adhesion	22	434	0.000531099624817122	0.0125883125490184	ENSG00000005884;ENSG00000011422;ENSG00000077942;ENSG00000092929;ENSG00000102837;ENSG00000104951;ENSG00000105894;ENSG00000106123;ENSG00000106541;ENSG00000124766;ENSG00000128342;ENSG00000130427;ENSG00000135077;ENSG00000139514;ENSG00000150782;ENSG00000151882;ENSG00000164171;ENSG00000164176;ENSG00000168743;ENSG00000186818;ENSG00000272398;ENSG00000275896
GO:0000076	DNA replication checkpoint	4	17	0.000531500935212467	0.0125883125490184	ENSG00000085840;ENSG00000093009;ENSG00000094804;ENSG00000167513
GO:2000726	negative regulation of cardiac muscle cell differentiation	4	17	0.000531500935212467	0.0125883125490184	ENSG00000107984;ENSG00000116741;ENSG00000155760;ENSG00000160211
GO:0010038	response to metal ion	20	377	0.000534979504351584	0.0125883125490184	ENSG00000019505;ENSG00000085491;ENSG00000096433;ENSG00000100985;ENSG00000104419;ENSG00000114346;ENSG00000132965;ENSG00000134057;ENSG00000140505;ENSG00000143546;ENSG00000145708;ENSG00000148344;ENSG00000160182;ENSG00000160211;ENSG00000164761;ENSG00000165168;ENSG00000169715;ENSG00000170312;ENSG00000181019;ENSG00000187193
GO:0070488	neutrophil aggregation	2	2	0.000535298530472591	0.0125883125490184	ENSG00000143546;ENSG00000163220
GO:0051276	chromosome organization	48	1269	0.000537222741694094	0.0125883125490184	ENSG00000013810;ENSG00000051180;ENSG00000071539;ENSG00000080986;ENSG00000090889;ENSG00000093009;ENSG00000094804;ENSG00000100162;ENSG00000105173;ENSG00000109805;ENSG00000112742;ENSG00000115163;ENSG00000117399;ENSG00000117650;ENSG00000117724;ENSG00000121152;ENSG00000123485;ENSG00000126787;ENSG00000128342;ENSG00000131747;ENSG00000134057;ENSG00000134690;ENSG00000135549;ENSG00000137309;ENSG00000137807…
GO:0042221	response to chemical	141	4786	0.000555733798944153	0.0129665597308467	ENSG00000005421;ENSG00000005884;ENSG00000011422;ENSG00000019505;ENSG00000041982;ENSG00000051180;ENSG00000051523;ENSG00000053918;ENSG00000054598;ENSG00000058085;ENSG00000067057;ENSG00000067225;ENSG00000074800;ENSG00000075461;ENSG00000075618;ENSG00000076864;ENSG00000077782;ENSG00000085491;ENSG00000085662;ENSG00000087245;ENSG00000088826;ENSG00000088992;ENSG00000089685;ENSG00000091129;ENSG00000092068…
GO:0010812	negative regulation of cell-substrate adhesion	7	62	0.000558054469428847	0.0129665597308467	ENSG00000077942;ENSG00000133110;ENSG00000147889;ENSG00000155760;ENSG00000157227;ENSG00000184292;ENSG00000262406
GO:0006720	isoprenoid metabolic process	11	145	0.00056799068406446	0.0131163797873012	ENSG00000076716;ENSG00000085662;ENSG00000106258;ENSG00000114113;ENSG00000130649;ENSG00000139547;ENSG00000140505;ENSG00000143320;ENSG00000160868;ENSG00000167600;ENSG00000227471
GO:1901992	positive regulation of mitotic cell cycle phase transition	8	81	0.000569246139051045	0.0131163797873012	ENSG00000094804;ENSG00000126787;ENSG00000134057;ENSG00000146670;ENSG00000164045;ENSG00000167513;ENSG00000170312;ENSG00000175063
GO:0000132	establishment of mitotic spindle orientation	5	30	0.000575153623943098	0.0131975084664122	ENSG00000080986;ENSG00000099812;ENSG00000115163;ENSG00000164109;ENSG00000166851
GO:0007275	multicellular organism development	159	5526	0.00061428735311844	0.014037227532004	ENSG00000005884;ENSG00000006611;ENSG00000007062;ENSG00000013810;ENSG00000021300;ENSG00000038427;ENSG00000041982;ENSG00000046604;ENSG00000049089;ENSG00000049130;ENSG00000053918;ENSG00000054598;ENSG00000058085;ENSG00000067225;ENSG00000069011;ENSG00000076716;ENSG00000076864;ENSG00000077782;ENSG00000077942;ENSG00000079462;ENSG00000080293;ENSG00000085662;ENSG00000087245;ENSG00000087494;ENSG00000088992…
GO:0006805	xenobiotic metabolic process	10	124	0.000622552254377915	0.0141675471881065	ENSG00000088826;ENSG00000106258;ENSG00000130649;ENSG00000140505;ENSG00000144959;ENSG00000160868;ENSG00000167600;ENSG00000181019;ENSG00000197838;ENSG00000198077
GO:0035425	autocrine signaling	3	8	0.000633625373794949	0.0143018298656574	ENSG00000135245;ENSG00000143546;ENSG00000163220
GO:2000698	positive regulation of epithelial cell differentiation involved in kidney development	3	8	0.000633625373794949	0.0143018298656574	ENSG00000007062;ENSG00000128342;ENSG00000272398
GO:0050729	positive regulation of inflammatory response	11	147	0.000637252186436484	0.0143252219146088	ENSG00000095970;ENSG00000103222;ENSG00000109861;ENSG00000132965;ENSG00000143546;ENSG00000145623;ENSG00000146070;ENSG00000150782;ENSG00000163220;ENSG00000164171;ENSG00000198535
GO:0051129	negative regulation of cellular component organization	33	780	0.000657305676842362	0.014716195922827	ENSG00000005448;ENSG00000005884;ENSG00000034510;ENSG00000070087;ENSG00000071539;ENSG00000076864;ENSG00000077942;ENSG00000080986;ENSG00000088325;ENSG00000104435;ENSG00000105894;ENSG00000107984;ENSG00000109846;ENSG00000112742;ENSG00000117399;ENSG00000117650;ENSG00000117724;ENSG00000118785;ENSG00000124225;ENSG00000128342;ENSG00000131747;ENSG00000133110;ENSG00000134057;ENSG00000137309;ENSG00000156970…
GO:0051101	regulation of DNA binding	10	125	0.000663028886597192	0.0147844747696874	ENSG00000011422;ENSG00000054598;ENSG00000100985;ENSG00000112559;ENSG00000117650;ENSG00000123485;ENSG00000128342;ENSG00000146670;ENSG00000164171;ENSG00000167513
GO:0002544	chronic inflammatory response	4	18	0.000670937935996301	0.0148411471442382	ENSG00000092929;ENSG00000143546;ENSG00000148344;ENSG00000163220
GO:0045618	positive regulation of keratinocyte differentiation	4	18	0.000670937935996301	0.0148411471442382	ENSG00000054598;ENSG00000175832;ENSG00000179593;ENSG00000221926
GO:0010033	response to organic substance	103	3309	0.000680692491442327	0.0149969301899445	ENSG00000005421;ENSG00000005884;ENSG00000041982;ENSG00000051180;ENSG00000051523;ENSG00000053918;ENSG00000054598;ENSG00000067057;ENSG00000067225;ENSG00000075461;ENSG00000075618;ENSG00000076864;ENSG00000077782;ENSG00000085662;ENSG00000087245;ENSG00000088992;ENSG00000089685;ENSG00000094804;ENSG00000095970;ENSG00000100985;ENSG00000101057;ENSG00000102007;ENSG00000103222;ENSG00000104435;ENSG00000105894…
GO:0009636	response to toxic substance	25	532	0.000689752508203551	0.015136235596689	ENSG00000005421;ENSG00000041982;ENSG00000051180;ENSG00000092068;ENSG00000109846;ENSG00000114346;ENSG00000116741;ENSG00000130649;ENSG00000132965;ENSG00000134057;ENSG00000143546;ENSG00000145708;ENSG00000148344;ENSG00000160211;ENSG00000163220;ENSG00000164294;ENSG00000165168;ENSG00000169715;ENSG00000170312;ENSG00000175344;ENSG00000176170;ENSG00000181019;ENSG00000183010;ENSG00000187193;ENSG00000214253
GO:0040007	growth	38	948	0.000725644168260607	0.0158609179860915	ENSG00000041982;ENSG00000051523;ENSG00000054598;ENSG00000074800;ENSG00000091129;ENSG00000101003;ENSG00000105894;ENSG00000106541;ENSG00000109846;ENSG00000111206;ENSG00000112655;ENSG00000113758;ENSG00000116741;ENSG00000118785;ENSG00000128422;ENSG00000130829;ENSG00000133110;ENSG00000134057;ENSG00000143320;ENSG00000143546;ENSG00000147889;ENSG00000155760;ENSG00000157227;ENSG00000157456;ENSG00000160211…
GO:0050900	leukocyte migration	24	507	0.000793828868734468	0.0172071738354261	ENSG00000005884;ENSG00000049130;ENSG00000069849;ENSG00000092068;ENSG00000095970;ENSG00000100604;ENSG00000100985;ENSG00000105894;ENSG00000129654;ENSG00000141526;ENSG00000143546;ENSG00000146070;ENSG00000151882;ENSG00000157227;ENSG00000158747;ENSG00000158869;ENSG00000163220;ENSG00000163735;ENSG00000163739;ENSG00000164171;ENSG00000169347;ENSG00000169429;ENSG00000169896;ENSG00000196611
GO:0007584	response to nutrient	14	225	0.000795666799571301	0.0172071738354261	ENSG00000041982;ENSG00000051523;ENSG00000105894;ENSG00000110195;ENSG00000113739;ENSG00000118785;ENSG00000130427;ENSG00000133110;ENSG00000151882;ENSG00000164171;ENSG00000164761;ENSG00000165168;ENSG00000181019;ENSG00000215644
GO:0035850	epithelial cell differentiation involved in kidney development	6	48	0.000802794005341761	0.0172071738354261	ENSG00000007062;ENSG00000100985;ENSG00000128342;ENSG00000129654;ENSG00000157483;ENSG00000272398
GO:0042572	retinol metabolic process	6	48	0.000802794005341761	0.0172071738354261	ENSG00000085662;ENSG00000106258;ENSG00000139547;ENSG00000140505;ENSG00000160868;ENSG00000227471
GO:1904645	response to amyloid-beta	6	48	0.000802794005341761	0.0172071738354261	ENSG00000087245;ENSG00000095970;ENSG00000100985;ENSG00000103222;ENSG00000175344;ENSG00000262406
GO:0150076	neuroinflammatory response	7	66	0.000816495584514775	0.017433284101802	ENSG00000095970;ENSG00000100985;ENSG00000109861;ENSG00000150782;ENSG00000169896;ENSG00000176170;ENSG00000182240
GO:0048468	cell development	73	2191	0.000820497869777019	0.0174513585379497	ENSG00000005884;ENSG00000006611;ENSG00000041982;ENSG00000049130;ENSG00000054598;ENSG00000058085;ENSG00000071539;ENSG00000076864;ENSG00000077782;ENSG00000077942;ENSG00000085662;ENSG00000087494;ENSG00000091129;ENSG00000091136;ENSG00000092445;ENSG00000092929;ENSG00000095970;ENSG00000102837;ENSG00000104419;ENSG00000104435;ENSG00000105894;ENSG00000107984;ENSG00000110195;ENSG00000112655;ENSG00000113083…
GO:0071241	cellular response to inorganic substance	14	226	0.000830765048999671	0.0175450341062732	ENSG00000019505;ENSG00000051180;ENSG00000085491;ENSG00000100985;ENSG00000114346;ENSG00000132965;ENSG00000134057;ENSG00000140505;ENSG00000145386;ENSG00000145708;ENSG00000165168;ENSG00000169715;ENSG00000181019;ENSG00000187193
GO:0070989	oxidative demethylation	4	19	0.000834420247730535	0.0175450341062732	ENSG00000021461;ENSG00000106258;ENSG00000140505;ENSG00000160868
GO:2000696	regulation of epithelial cell differentiation involved in kidney development	4	19	0.000834420247730535	0.0175450341062732	ENSG00000007062;ENSG00000100985;ENSG00000128342;ENSG00000272398
GO:0045787	positive regulation of cell cycle	20	392	0.000868150361990315	0.0181686174680031	ENSG00000075218;ENSG00000080986;ENSG00000094804;ENSG00000114346;ENSG00000124766;ENSG00000126787;ENSG00000134057;ENSG00000137807;ENSG00000146670;ENSG00000147889;ENSG00000161800;ENSG00000164045;ENSG00000164109;ENSG00000167513;ENSG00000170312;ENSG00000175063;ENSG00000175793;ENSG00000176170;ENSG00000178999;ENSG00000185499
GO:0048522	positive regulation of cellular process	159	5566	0.000872947134652489	0.0181686174680031	ENSG00000005001;ENSG00000005884;ENSG00000007062;ENSG00000011422;ENSG00000011426;ENSG00000035499;ENSG00000041982;ENSG00000046774;ENSG00000049130;ENSG00000051180;ENSG00000051523;ENSG00000053918;ENSG00000054598;ENSG00000058085;ENSG00000067225;ENSG00000069011;ENSG00000069849;ENSG00000070087;ENSG00000074800;ENSG00000075218;ENSG00000075461;ENSG00000075618;ENSG00000077782;ENSG00000077942;ENSG00000080293…
GO:0048731	system development	144	4956	0.000873933498460909	0.0181686174680031	ENSG00000005884;ENSG00000006611;ENSG00000007062;ENSG00000013810;ENSG00000038427;ENSG00000041982;ENSG00000046604;ENSG00000049089;ENSG00000049130;ENSG00000053918;ENSG00000054598;ENSG00000058085;ENSG00000067225;ENSG00000069011;ENSG00000076716;ENSG00000076864;ENSG00000077782;ENSG00000079462;ENSG00000080293;ENSG00000085662;ENSG00000087245;ENSG00000087494;ENSG00000088992;ENSG00000091129;ENSG00000091136…
GO:0032269	negative regulation of cellular protein metabolic process	41	1059	0.000886592757245281	0.0183627638485633	ENSG00000011422;ENSG00000077942;ENSG00000088992;ENSG00000089685;ENSG00000100985;ENSG00000101443;ENSG00000104341;ENSG00000105894;ENSG00000107984;ENSG00000109846;ENSG00000111206;ENSG00000116741;ENSG00000118849;ENSG00000123243;ENSG00000124102;ENSG00000124225;ENSG00000124766;ENSG00000126259;ENSG00000128342;ENSG00000130829;ENSG00000134057;ENSG00000135549;ENSG00000147889;ENSG00000153233;ENSG00000154277…
GO:0030261	chromosome condensation	7	67	0.000893913884532466	0.018445312617405	ENSG00000109805;ENSG00000121152;ENSG00000131747;ENSG00000134057;ENSG00000146670;ENSG00000166851;ENSG00000170312
GO:0150077	regulation of neuroinflammatory response	5	33	0.00090485026964179	0.0186015687402197	ENSG00000095970;ENSG00000100985;ENSG00000109861;ENSG00000150782;ENSG00000176170
GO:0140059	dendrite arborization	3	9	0.000934136833205069	0.0191296632491349	ENSG00000105894;ENSG00000159217;ENSG00000175344
GO:0030856	regulation of epithelial cell differentiation	11	154	0.000937457276765925	0.0191296632491349	ENSG00000007062;ENSG00000054598;ENSG00000100985;ENSG00000128342;ENSG00000129654;ENSG00000136943;ENSG00000175793;ENSG00000175832;ENSG00000179593;ENSG00000221926;ENSG00000272398
GO:0065009	regulation of molecular function	97	3117	0.00103513169310869	0.0209321498835075	ENSG00000005001;ENSG00000005421;ENSG00000011422;ENSG00000035499;ENSG00000046774;ENSG00000049130;ENSG00000051523;ENSG00000053918;ENSG00000054598;ENSG00000069849;ENSG00000070087;ENSG00000075461;ENSG00000076864;ENSG00000077782;ENSG00000077942;ENSG00000088325;ENSG00000088992;ENSG00000089356;ENSG00000089685;ENSG00000090104;ENSG00000092445;ENSG00000094804;ENSG00000095970;ENSG00000100985;ENSG00000101443…
GO:0030330	DNA damage response, signal transduction by p53 class mediator	9	110	0.00103999976942523	0.0209321498835075	ENSG00000075218;ENSG00000104419;ENSG00000111206;ENSG00000124766;ENSG00000134057;ENSG00000147889;ENSG00000170312;ENSG00000175793;ENSG00000185499
GO:0000083	regulation of transcription involved in G1/S transition of mitotic cell cycle	5	34	0.00104092969583446	0.0209321498835075	ENSG00000085840;ENSG00000093009;ENSG00000094804;ENSG00000105173;ENSG00000167513
GO:0042908	xenobiotic transport	5	34	0.00104092969583446	0.0209321498835075	ENSG00000103222;ENSG00000117394;ENSG00000131389;ENSG00000167972;ENSG00000175003
GO:0000082	G1/S transition of mitotic cell cycle	14	232	0.00106996542912132	0.0214380754458003	ENSG00000075218;ENSG00000085840;ENSG00000093009;ENSG00000094804;ENSG00000105173;ENSG00000124766;ENSG00000134057;ENSG00000147889;ENSG00000164045;ENSG00000167513;ENSG00000170312;ENSG00000175793;ENSG00000185499;ENSG00000206557
GO:0008285	negative regulation of cell proliferation	30	708	0.00112080633649941	0.0223756644073708	ENSG00000076864;ENSG00000077942;ENSG00000087494;ENSG00000088992;ENSG00000094804;ENSG00000095970;ENSG00000104419;ENSG00000104951;ENSG00000105894;ENSG00000110811;ENSG00000118849;ENSG00000120057;ENSG00000124766;ENSG00000128342;ENSG00000129654;ENSG00000135077;ENSG00000137309;ENSG00000137573;ENSG00000147889;ENSG00000148344;ENSG00000155659;ENSG00000160182;ENSG00000163191;ENSG00000163739;ENSG00000169429…
GO:0072009	nephron epithelium development	9	112	0.0011819497143226	0.0235114457561293	ENSG00000007062;ENSG00000054598;ENSG00000128342;ENSG00000129654;ENSG00000157483;ENSG00000168743;ENSG00000184292;ENSG00000260027;ENSG00000272398
GO:0001893	maternal placenta development	5	35	0.00119161729082006	0.0235344414936961	ENSG00000105894;ENSG00000113739;ENSG00000118785;ENSG00000128342;ENSG00000136943
GO:0051984	positive regulation of chromosome segregation	5	35	0.00119161729082006	0.0235344414936961	ENSG00000094804;ENSG00000126787;ENSG00000134057;ENSG00000167513;ENSG00000178999
GO:0042770	signal transduction in response to DNA damage	10	135	0.00120086984006393	0.0236327765678061	ENSG00000075218;ENSG00000104419;ENSG00000111206;ENSG00000124766;ENSG00000134057;ENSG00000147889;ENSG00000166851;ENSG00000170312;ENSG00000175793;ENSG00000185499
GO:0071466	cellular response to xenobiotic stimulus	12	184	0.00123764036752993	0.0241864039812382	ENSG00000088826;ENSG00000106258;ENSG00000130649;ENSG00000140505;ENSG00000144959;ENSG00000145386;ENSG00000145708;ENSG00000160868;ENSG00000167600;ENSG00000181019;ENSG00000197838;ENSG00000198077
GO:0072311	glomerular epithelial cell differentiation	4	21	0.00124212273610699	0.0241864039812382	ENSG00000007062;ENSG00000129654;ENSG00000157483;ENSG00000272398
GO:1905208	negative regulation of cardiocyte differentiation	4	21	0.00124212273610699	0.0241864039812382	ENSG00000107984;ENSG00000116741;ENSG00000155760;ENSG00000160211
GO:0031570	DNA integrity checkpoint	11	160	0.00128013861266913	0.0248391808002116	ENSG00000075218;ENSG00000085840;ENSG00000093009;ENSG00000094804;ENSG00000124766;ENSG00000134057;ENSG00000166851;ENSG00000167513;ENSG00000170312;ENSG00000175793;ENSG00000185499
GO:0046942	carboxylic acid transport	18	347	0.00128842337949766	0.024912521988189	ENSG00000083807;ENSG00000092068;ENSG00000103222;ENSG00000105281;ENSG00000110195;ENSG00000111371;ENSG00000116741;ENSG00000117394;ENSG00000131389;ENSG00000139514;ENSG00000140107;ENSG00000141526;ENSG00000148344;ENSG00000151365;ENSG00000163053;ENSG00000164687;ENSG00000197696;ENSG00000214253
GO:0031915	positive regulation of synaptic plasticity	3	10	0.00131161958555856	0.0250977726925219	ENSG00000113758;ENSG00000117399;ENSG00000145920
GO:0044771	meiotic cell cycle phase transition	3	10	0.00131161958555856	0.0250977726925219	ENSG00000112742;ENSG00000157456;ENSG00000164045
GO:1900426	positive regulation of defense response to bacterium	3	10	0.00131161958555856	0.0250977726925219	ENSG00000051523;ENSG00000096088;ENSG00000135077
GO:0015849	organic acid transport	18	348	0.00133049722973254	0.0253712057945549	ENSG00000083807;ENSG00000092068;ENSG00000103222;ENSG00000105281;ENSG00000110195;ENSG00000111371;ENSG00000116741;ENSG00000117394;ENSG00000131389;ENSG00000139514;ENSG00000140107;ENSG00000141526;ENSG00000148344;ENSG00000151365;ENSG00000163053;ENSG00000164687;ENSG00000197696;ENSG00000214253
GO:0040001	establishment of mitotic spindle localization	5	36	0.00135784776601157	0.0257154046097396	ENSG00000080986;ENSG00000099812;ENSG00000115163;ENSG00000164109;ENSG00000166851
GO:0051154	negative regulation of striated muscle cell differentiation	5	36	0.00135784776601157	0.0257154046097396	ENSG00000107984;ENSG00000116741;ENSG00000123095;ENSG00000155760;ENSG00000160211
GO:0019320	hexose catabolic process	6	53	0.00136294894655388	0.025723916977621	ENSG00000067057;ENSG00000067225;ENSG00000074800;ENSG00000111674;ENSG00000149925;ENSG00000159399
GO:0008219	cell death	73	2233	0.00138076944483365	0.0259716157480615	ENSG00000011422;ENSG00000046604;ENSG00000049130;ENSG00000054598;ENSG00000067225;ENSG00000074800;ENSG00000077782;ENSG00000085491;ENSG00000085662;ENSG00000088325;ENSG00000089685;ENSG00000092445;ENSG00000095970;ENSG00000100604;ENSG00000100985;ENSG00000101057;ENSG00000104419;ENSG00000105894;ENSG00000106541;ENSG00000107984;ENSG00000109846;ENSG00000109861;ENSG00000113083;ENSG00000114346;ENSG00000117525…
GO:0033993	response to lipid	37	949	0.00139549285390789	0.0261595779054599	ENSG00000005421;ENSG00000041982;ENSG00000051523;ENSG00000088992;ENSG00000095970;ENSG00000105894;ENSG00000107159;ENSG00000109846;ENSG00000112655;ENSG00000113083;ENSG00000113739;ENSG00000118785;ENSG00000124225;ENSG00000130427;ENSG00000133110;ENSG00000134057;ENSG00000135077;ENSG00000136943;ENSG00000140505;ENSG00000143546;ENSG00000145386;ENSG00000145708;ENSG00000148344;ENSG00000150782;ENSG00000153071…
GO:0001676	long-chain fatty acid metabolic process	9	115	0.00142384126417997	0.0266008182125514	ENSG00000083807;ENSG00000130649;ENSG00000140505;ENSG00000148344;ENSG00000160868;ENSG00000167600;ENSG00000179593;ENSG00000197838;ENSG00000198077
GO:0015711	organic anion transport	23	499	0.00143952718742229	0.0268033176647988	ENSG00000074410;ENSG00000083807;ENSG00000085491;ENSG00000092068;ENSG00000103222;ENSG00000105281;ENSG00000107159;ENSG00000110195;ENSG00000111371;ENSG00000116741;ENSG00000117394;ENSG00000131389;ENSG00000139514;ENSG00000140107;ENSG00000141526;ENSG00000148344;ENSG00000151365;ENSG00000163053;ENSG00000164687;ENSG00000167972;ENSG00000184999;ENSG00000197696;ENSG00000214253
GO:0033627	cell adhesion mediated by integrin	7	73	0.00148778990699761	0.027424927285656	ENSG00000088992;ENSG00000122861;ENSG00000128342;ENSG00000132470;ENSG00000164171;ENSG00000168743;ENSG00000185499
GO:0072401	signal transduction involved in DNA integrity checkpoint	7	73	0.00148778990699761	0.027424927285656	ENSG00000075218;ENSG00000124766;ENSG00000134057;ENSG00000166851;ENSG00000170312;ENSG00000175793;ENSG00000185499
GO:0072422	signal transduction involved in DNA damage checkpoint	7	73	0.00148778990699761	0.027424927285656	ENSG00000075218;ENSG00000124766;ENSG00000134057;ENSG00000166851;ENSG00000170312;ENSG00000175793;ENSG00000185499
GO:0044093	positive regulation of molecular function	60	1762	0.00151880735484996	0.0278136768146583	ENSG00000005001;ENSG00000005421;ENSG00000011422;ENSG00000035499;ENSG00000046774;ENSG00000049130;ENSG00000051523;ENSG00000054598;ENSG00000069849;ENSG00000070087;ENSG00000075461;ENSG00000076864;ENSG00000077782;ENSG00000077942;ENSG00000088325;ENSG00000088992;ENSG00000090104;ENSG00000092445;ENSG00000094804;ENSG00000095970;ENSG00000100985;ENSG00000106123;ENSG00000107984;ENSG00000114346;ENSG00000116741…
GO:0033273	response to vitamin	8	94	0.00151893858915494	0.0278136768146583	ENSG00000041982;ENSG00000105894;ENSG00000110195;ENSG00000113739;ENSG00000118785;ENSG00000130427;ENSG00000133110;ENSG00000164171
GO:0051294	establishment of spindle orientation	5	37	0.00154056915488034	0.0281166581732286	ENSG00000080986;ENSG00000099812;ENSG00000115163;ENSG00000164109;ENSG00000166851
GO:0009822	alkaloid catabolic process	2	3	0.00158121410796551	0.0282068194098364	ENSG00000106258;ENSG00000160868
GO:0014707	branchiomeric skeletal muscle development	2	3	0.00158121410796551	0.0282068194098364	ENSG00000069011;ENSG00000178860
GO:0035986	senescence-associated heterochromatin focus assembly	2	3	0.00158121410796551	0.0282068194098364	ENSG00000137309;ENSG00000147889
GO:0061182	negative regulation of chondrocyte development	2	3	0.00158121410796551	0.0282068194098364	ENSG00000087494;ENSG00000178882
GO:0071163	DNA replication preinitiation complex assembly	2	3	0.00158121410796551	0.0282068194098364	ENSG00000093009;ENSG00000167513
GO:1904845	cellular response to L-glutamine	2	3	0.00158121410796551	0.0282068194098364	ENSG00000051523;ENSG00000165168
GO:2000768	positive regulation of nephron tubule epithelial cell differentiation	2	3	0.00158121410796551	0.0282068194098364	ENSG00000007062;ENSG00000272398
GO:0045055	regulated exocytosis	32	790	0.00160382449023496	0.0285181653729883	ENSG00000011422;ENSG00000019505;ENSG00000051523;ENSG00000067225;ENSG00000070087;ENSG00000092929;ENSG00000100604;ENSG00000100985;ENSG00000102837;ENSG00000106348;ENSG00000109861;ENSG00000122861;ENSG00000124491;ENSG00000133063;ENSG00000141524;ENSG00000143226;ENSG00000143546;ENSG00000145685;ENSG00000145708;ENSG00000145920;ENSG00000149925;ENSG00000153395;ENSG00000158869;ENSG00000163191;ENSG00000163220…
GO:0090183	regulation of kidney development	6	55	0.00165563860460131	0.0293105813807486	ENSG00000007062;ENSG00000100985;ENSG00000128342;ENSG00000184292;ENSG00000260027;ENSG00000272398
GO:0001101	response to acid chemical	18	355	0.0016589895067223	0.0293105813807486	ENSG00000005421;ENSG00000041982;ENSG00000051523;ENSG00000085662;ENSG00000087245;ENSG00000088992;ENSG00000105894;ENSG00000110195;ENSG00000112655;ENSG00000130649;ENSG00000134057;ENSG00000148344;ENSG00000155760;ENSG00000164171;ENSG00000165168;ENSG00000181019;ENSG00000214253;ENSG00000221926
GO:0042737	drug catabolic process	10	141	0.00166658404107953	0.0293256876561639	ENSG00000088826;ENSG00000104951;ENSG00000106258;ENSG00000130649;ENSG00000133063;ENSG00000140505;ENSG00000160868;ENSG00000167600;ENSG00000197838;ENSG00000198077
GO:0051272	positive regulation of cellular component movement	25	567	0.00167545835841871	0.0293256876561639	ENSG00000005884;ENSG00000049130;ENSG00000058085;ENSG00000075218;ENSG00000077782;ENSG00000077942;ENSG00000091136;ENSG00000095970;ENSG00000100985;ENSG00000102359;ENSG00000105894;ENSG00000117525;ENSG00000122861;ENSG00000133110;ENSG00000137285;ENSG00000137673;ENSG00000140274;ENSG00000146070;ENSG00000153071;ENSG00000157227;ENSG00000163191;ENSG00000164171;ENSG00000169429;ENSG00000176170;ENSG00000267795
GO:0046903	secretion	52	1481	0.00167575358035222	0.0293256876561639	ENSG00000011422;ENSG00000019505;ENSG00000051523;ENSG00000053918;ENSG00000067225;ENSG00000070087;ENSG00000089685;ENSG00000092445;ENSG00000092929;ENSG00000095970;ENSG00000096433;ENSG00000100604;ENSG00000100985;ENSG00000102837;ENSG00000105281;ENSG00000106348;ENSG00000106541;ENSG00000107159;ENSG00000109861;ENSG00000117394;ENSG00000118785;ENSG00000122861;ENSG00000124491;ENSG00000124766;ENSG00000128342…
GO:0009653	anatomical structure morphogenesis	85	2703	0.00168897126906504	0.0294637574698096	ENSG00000005884;ENSG00000006611;ENSG00000007062;ENSG00000041982;ENSG00000054598;ENSG00000058085;ENSG00000067225;ENSG00000069011;ENSG00000076716;ENSG00000076864;ENSG00000077782;ENSG00000077942;ENSG00000087245;ENSG00000091129;ENSG00000091136;ENSG00000092445;ENSG00000092929;ENSG00000095970;ENSG00000100985;ENSG00000102359;ENSG00000102837;ENSG00000105894;ENSG00000106541;ENSG00000107159;ENSG00000107984…
GO:0030307	positive regulation of cell growth	11	166	0.00171968826726619	0.0299052708112643	ENSG00000051523;ENSG00000113758;ENSG00000128422;ENSG00000143320;ENSG00000143546;ENSG00000157227;ENSG00000163220;ENSG00000175793;ENSG00000176170;ENSG00000187688;ENSG00000275896
GO:0051656	establishment of organelle localization	24	537	0.00172534060307689	0.0299095095141542	ENSG00000070087;ENSG00000080986;ENSG00000092929;ENSG00000099812;ENSG00000100604;ENSG00000109861;ENSG00000110195;ENSG00000115163;ENSG00000117724;ENSG00000126787;ENSG00000129354;ENSG00000134057;ENSG00000134690;ENSG00000142945;ENSG00000143228;ENSG00000145920;ENSG00000146670;ENSG00000154277;ENSG00000157483;ENSG00000164109;ENSG00000166851;ENSG00000167513;ENSG00000178999;ENSG00000237649
GO:0052547	regulation of peptidase activity	21	446	0.00176873233705965	0.0303485140774952	ENSG00000005001;ENSG00000011422;ENSG00000077942;ENSG00000089685;ENSG00000100985;ENSG00000101443;ENSG00000109846;ENSG00000117525;ENSG00000118849;ENSG00000123243;ENSG00000124102;ENSG00000129521;ENSG00000143546;ENSG00000147889;ENSG00000163220;ENSG00000163359;ENSG00000164611;ENSG00000171199;ENSG00000175793;ENSG00000214253;ENSG00000221867
GO:0006323	DNA packaging	13	218	0.00177255592416348	0.0303485140774952	ENSG00000100162;ENSG00000109805;ENSG00000115163;ENSG00000121152;ENSG00000123485;ENSG00000131747;ENSG00000134057;ENSG00000137309;ENSG00000146670;ENSG00000147889;ENSG00000159259;ENSG00000166851;ENSG00000170312
GO:0071492	cellular response to UV-A	3	11	0.00177261664503272	0.0303485140774952	ENSG00000087245;ENSG00000100985;ENSG00000196611
GO:0098883	synapse pruning	3	11	0.00177261664503272	0.0303485140774952	ENSG00000095970;ENSG00000107984;ENSG00000169896
GO:0032787	monocarboxylic acid metabolic process	28	666	0.0018227282114138	0.0311101450898714	ENSG00000005421;ENSG00000038427;ENSG00000067057;ENSG00000067225;ENSG00000074800;ENSG00000083807;ENSG00000085662;ENSG00000104951;ENSG00000106258;ENSG00000111674;ENSG00000111716;ENSG00000130649;ENSG00000132965;ENSG00000140505;ENSG00000141526;ENSG00000143320;ENSG00000148344;ENSG00000149925;ENSG00000159399;ENSG00000160868;ENSG00000162174;ENSG00000164181;ENSG00000164687;ENSG00000167600;ENSG00000170525…
GO:0034754	cellular hormone metabolic process	10	143	0.00185089339679279	0.0314936630285051	ENSG00000085662;ENSG00000104951;ENSG00000106258;ENSG00000118785;ENSG00000139547;ENSG00000140505;ENSG00000143320;ENSG00000160868;ENSG00000167600;ENSG00000227471
GO:0072395	signal transduction involved in cell cycle checkpoint	7	76	0.00188168109103077	0.0319193142128838	ENSG00000075218;ENSG00000124766;ENSG00000134057;ENSG00000166851;ENSG00000170312;ENSG00000175793;ENSG00000185499
GO:0019730	antimicrobial humoral response	10	144	0.00194903549167955	0.032960753116171	ENSG00000096088;ENSG00000100604;ENSG00000101443;ENSG00000124102;ENSG00000143546;ENSG00000163220;ENSG00000163735;ENSG00000163739;ENSG00000169429;ENSG00000275896
GO:0034599	cellular response to oxidative stress	16	303	0.00196482959589469	0.0331265477600537	ENSG00000051523;ENSG00000085491;ENSG00000087245;ENSG00000100985;ENSG00000114346;ENSG00000116701;ENSG00000145386;ENSG00000160211;ENSG00000164294;ENSG00000165168;ENSG00000165304;ENSG00000170312;ENSG00000176170;ENSG00000181019;ENSG00000183010;ENSG00000244405
GO:0001558	regulation of cell growth	20	420	0.00197873095926622	0.0332595203791556	ENSG00000051523;ENSG00000074800;ENSG00000091129;ENSG00000109846;ENSG00000111206;ENSG00000113758;ENSG00000116741;ENSG00000118785;ENSG00000128422;ENSG00000143320;ENSG00000143546;ENSG00000147889;ENSG00000157227;ENSG00000160211;ENSG00000163220;ENSG00000175793;ENSG00000176170;ENSG00000187688;ENSG00000204580;ENSG00000275896
GO:0006977	DNA damage response, signal transduction by p53 class mediator resulting in cell cycle arrest	6	57	0.00199375023612998	0.0334104206236327	ENSG00000075218;ENSG00000124766;ENSG00000134057;ENSG00000170312;ENSG00000175793;ENSG00000185499
GO:0048523	negative regulation of cellular process	141	4934	0.0020693759850301	0.0345729582997476	ENSG00000005448;ENSG00000005884;ENSG00000011422;ENSG00000034510;ENSG00000041982;ENSG00000049130;ENSG00000050344;ENSG00000051180;ENSG00000051523;ENSG00000053918;ENSG00000054598;ENSG00000068489;ENSG00000069011;ENSG00000070087;ENSG00000071539;ENSG00000074800;ENSG00000075218;ENSG00000076864;ENSG00000077942;ENSG00000080986;ENSG00000085662;ENSG00000085840;ENSG00000087494;ENSG00000088325;ENSG00000088992…
GO:0032101	regulation of response to external stimulus	39	1040	0.00209770713311532	0.0349407242353244	ENSG00000011422;ENSG00000051523;ENSG00000077782;ENSG00000080293;ENSG00000087494;ENSG00000092445;ENSG00000095970;ENSG00000096088;ENSG00000100985;ENSG00000103222;ENSG00000105894;ENSG00000109861;ENSG00000117525;ENSG00000118785;ENSG00000122861;ENSG00000132965;ENSG00000135077;ENSG00000137285;ENSG00000140274;ENSG00000143226;ENSG00000143546;ENSG00000145623;ENSG00000146070;ENSG00000148344;ENSG00000150782…
GO:0071840	cellular component organization or biogenesis	190	6966	0.00215201815913128	0.0354261678456868	ENSG00000005448;ENSG00000005884;ENSG00000006611;ENSG00000011422;ENSG00000011426;ENSG00000013810;ENSG00000019505;ENSG00000034510;ENSG00000038427;ENSG00000041982;ENSG00000046604;ENSG00000049089;ENSG00000051180;ENSG00000051523;ENSG00000054598;ENSG00000058085;ENSG00000070087;ENSG00000071539;ENSG00000074800;ENSG00000075461;ENSG00000075618;ENSG00000076716;ENSG00000076864;ENSG00000077274;ENSG00000077942…
GO:0051234	establishment of localization	149	5265	0.00216001070840891	0.0354261678456868	ENSG00000005059;ENSG00000005421;ENSG00000005448;ENSG00000011028;ENSG00000011422;ENSG00000019505;ENSG00000051523;ENSG00000053918;ENSG00000067225;ENSG00000069849;ENSG00000070087;ENSG00000074410;ENSG00000075218;ENSG00000075461;ENSG00000080986;ENSG00000083807;ENSG00000085491;ENSG00000088992;ENSG00000089356;ENSG00000089685;ENSG00000090889;ENSG00000092068;ENSG00000092445;ENSG00000092929;ENSG00000095970…
GO:0097164	ammonium ion metabolic process	13	223	0.00216482057176124	0.0354261678456868	ENSG00000005421;ENSG00000085662;ENSG00000088826;ENSG00000121316;ENSG00000141934;ENSG00000146070;ENSG00000153395;ENSG00000163082;ENSG00000164687;ENSG00000167972;ENSG00000169896;ENSG00000176170;ENSG00000176454
GO:0051438	regulation of ubiquitin-protein transferase activity	6	58	0.00218118537382319	0.0354261678456868	ENSG00000046774;ENSG00000117399;ENSG00000147889;ENSG00000164109;ENSG00000166851;ENSG00000175063
GO:0061005	cell differentiation involved in kidney development	6	58	0.00218118537382319	0.0354261678456868	ENSG00000007062;ENSG00000100985;ENSG00000128342;ENSG00000129654;ENSG00000157483;ENSG00000272398
GO:0072431	signal transduction involved in mitotic G1 DNA damage checkpoint	6	58	0.00218118537382319	0.0354261678456868	ENSG00000075218;ENSG00000124766;ENSG00000134057;ENSG00000170312;ENSG00000175793;ENSG00000185499
GO:1902400	intracellular signal transduction involved in G1 DNA damage checkpoint	6	58	0.00218118537382319	0.0354261678456868	ENSG00000075218;ENSG00000124766;ENSG00000134057;ENSG00000170312;ENSG00000175793;ENSG00000185499
GO:0019748	secondary metabolic process	7	78	0.00218614108308514	0.0354261678456868	ENSG00000085662;ENSG00000106258;ENSG00000140505;ENSG00000160868;ENSG00000185664;ENSG00000197838;ENSG00000198077
GO:0045595	regulation of cell differentiation	63	1900	0.00218639487747589	0.0354261678456868	ENSG00000005884;ENSG00000007062;ENSG00000021300;ENSG00000049130;ENSG00000054598;ENSG00000076864;ENSG00000077782;ENSG00000077942;ENSG00000087494;ENSG00000088992;ENSG00000091129;ENSG00000092929;ENSG00000095970;ENSG00000100985;ENSG00000102837;ENSG00000104435;ENSG00000104951;ENSG00000105894;ENSG00000107984;ENSG00000112655;ENSG00000113083;ENSG00000113758;ENSG00000114346;ENSG00000116741;ENSG00000117399…
GO:0032467	positive regulation of cytokinesis	5	40	0.00219731927144134	0.0354261678456868	ENSG00000094804;ENSG00000114346;ENSG00000137807;ENSG00000161800;ENSG00000178999
GO:0071276	cellular response to cadmium ion	5	40	0.00219731927144134	0.0354261678456868	ENSG00000100985;ENSG00000140505;ENSG00000165168;ENSG00000169715;ENSG00000187193
GO:0060249	anatomical structure homeostasis	21	455	0.002247578209278	0.0361105978317801	ENSG00000006611;ENSG00000007062;ENSG00000051180;ENSG00000054598;ENSG00000085662;ENSG00000092445;ENSG00000105173;ENSG00000113083;ENSG00000117394;ENSG00000117650;ENSG00000118785;ENSG00000135549;ENSG00000149925;ENSG00000153395;ENSG00000160181;ENSG00000160182;ENSG00000164761;ENSG00000167972;ENSG00000171199;ENSG00000174371;ENSG00000178999
GO:1901989	positive regulation of cell cycle phase transition	8	100	0.00225283114863728	0.0361105978317801	ENSG00000094804;ENSG00000126787;ENSG00000134057;ENSG00000146670;ENSG00000164045;ENSG00000167513;ENSG00000170312;ENSG00000175063
GO:0040017	positive regulation of locomotion	25	580	0.00227033171143117	0.0362859374688277	ENSG00000005884;ENSG00000049130;ENSG00000058085;ENSG00000075218;ENSG00000077782;ENSG00000077942;ENSG00000091136;ENSG00000095970;ENSG00000100985;ENSG00000102359;ENSG00000105894;ENSG00000117525;ENSG00000122861;ENSG00000133110;ENSG00000137285;ENSG00000137673;ENSG00000140274;ENSG00000146070;ENSG00000153071;ENSG00000157227;ENSG00000163191;ENSG00000164171;ENSG00000169429;ENSG00000176170;ENSG00000267795
GO:0071248	cellular response to metal ion	12	198	0.00229735436308107	0.0365787636825274	ENSG00000019505;ENSG00000085491;ENSG00000100985;ENSG00000114346;ENSG00000132965;ENSG00000134057;ENSG00000140505;ENSG00000145708;ENSG00000165168;ENSG00000169715;ENSG00000181019;ENSG00000187193
GO:2000147	positive regulation of cell motility	24	549	0.00230188241618798	0.0365787636825274	ENSG00000005884;ENSG00000049130;ENSG00000058085;ENSG00000075218;ENSG00000077782;ENSG00000077942;ENSG00000091136;ENSG00000095970;ENSG00000100985;ENSG00000102359;ENSG00000105894;ENSG00000117525;ENSG00000122861;ENSG00000133110;ENSG00000137673;ENSG00000140274;ENSG00000146070;ENSG00000153071;ENSG00000157227;ENSG00000163191;ENSG00000164171;ENSG00000169429;ENSG00000176170;ENSG00000267795
GO:0060452	positive regulation of cardiac muscle contraction	3	12	0.00232309314477978	0.0367048716875205	ENSG00000053918;ENSG00000100604;ENSG00000116741
GO:0071635	negative regulation of transforming growth factor beta production	3	12	0.00232309314477978	0.0367048716875205	ENSG00000077942;ENSG00000104341;ENSG00000272398
GO:0043627	response to estrogen	7	79	0.00235195643787343	0.0370550401750429	ENSG00000130427;ENSG00000145708;ENSG00000157227;ENSG00000157765;ENSG00000164761;ENSG00000171345;ENSG00000272398
GO:1902402	signal transduction involved in mitotic DNA damage checkpoint	6	59	0.0023816057198169	0.0373095740243271	ENSG00000075218;ENSG00000124766;ENSG00000134057;ENSG00000170312;ENSG00000175793;ENSG00000185499
GO:1902403	signal transduction involved in mitotic DNA integrity checkpoint	6	59	0.0023816057198169	0.0373095740243271	ENSG00000075218;ENSG00000124766;ENSG00000134057;ENSG00000170312;ENSG00000175793;ENSG00000185499
GO:0042445	hormone metabolic process	14	253	0.00240867622320998	0.0376270607750033	ENSG00000085662;ENSG00000104951;ENSG00000106258;ENSG00000113739;ENSG00000118785;ENSG00000139547;ENSG00000140274;ENSG00000140505;ENSG00000143320;ENSG00000160868;ENSG00000167600;ENSG00000175426;ENSG00000182240;ENSG00000227471
GO:0007162	negative regulation of cell adhesion	15	281	0.0024215112090127	0.0377210055939161	ENSG00000041982;ENSG00000077942;ENSG00000104951;ENSG00000129654;ENSG00000133110;ENSG00000135077;ENSG00000147889;ENSG00000151882;ENSG00000155659;ENSG00000155760;ENSG00000157227;ENSG00000184292;ENSG00000185499;ENSG00000186818;ENSG00000262406
GO:0035239	tube morphogenesis	33	845	0.00244256005656549	0.0379420143618178	ENSG00000041982;ENSG00000054598;ENSG00000067225;ENSG00000087245;ENSG00000091129;ENSG00000102359;ENSG00000105894;ENSG00000106541;ENSG00000110195;ENSG00000112655;ENSG00000113083;ENSG00000117525;ENSG00000120057;ENSG00000124766;ENSG00000137573;ENSG00000141756;ENSG00000143125;ENSG00000150782;ENSG00000157227;ENSG00000157483;ENSG00000157613;ENSG00000159399;ENSG00000161714;ENSG00000164932;ENSG00000165168…
GO:0000910	cytokinesis	11	174	0.00249007211540501	0.0384639631234349	ENSG00000011426;ENSG00000090889;ENSG00000094804;ENSG00000112984;ENSG00000114346;ENSG00000115163;ENSG00000137807;ENSG00000138180;ENSG00000161800;ENSG00000166851;ENSG00000178999
GO:0051302	regulation of cell division	11	174	0.00249007211540501	0.0384639631234349	ENSG00000094804;ENSG00000105894;ENSG00000112984;ENSG00000114346;ENSG00000137807;ENSG00000143125;ENSG00000161800;ENSG00000166851;ENSG00000175793;ENSG00000178999;ENSG00000186185
GO:0009611	response to wounding	29	714	0.00252265090954516	0.0388586616428543	ENSG00000011422;ENSG00000041982;ENSG00000054179;ENSG00000077942;ENSG00000092445;ENSG00000096433;ENSG00000105894;ENSG00000109758;ENSG00000110195;ENSG00000112655;ENSG00000113083;ENSG00000117525;ENSG00000118785;ENSG00000122861;ENSG00000124491;ENSG00000130427;ENSG00000132470;ENSG00000133110;ENSG00000134057;ENSG00000138119;ENSG00000141756;ENSG00000143546;ENSG00000153933;ENSG00000155760;ENSG00000158869…
GO:0010811	positive regulation of cell-substrate adhesion	9	125	0.00253107598118694	0.0388801393776771	ENSG00000005884;ENSG00000077942;ENSG00000092929;ENSG00000102837;ENSG00000105894;ENSG00000106541;ENSG00000151882;ENSG00000164176;ENSG00000168743
GO:0045840	positive regulation of mitotic nuclear division	6	60	0.00259556846323332	0.039760370087757	ENSG00000126787;ENSG00000146670;ENSG00000167513;ENSG00000175063;ENSG00000176170;ENSG00000178999
GO:0006820	anion transport	27	651	0.00263996965296782	0.0403288181793151	ENSG00000074410;ENSG00000083807;ENSG00000085491;ENSG00000089356;ENSG00000092068;ENSG00000103222;ENSG00000105281;ENSG00000107159;ENSG00000110195;ENSG00000111371;ENSG00000116741;ENSG00000117394;ENSG00000131389;ENSG00000139514;ENSG00000140107;ENSG00000141526;ENSG00000148344;ENSG00000151365;ENSG00000157765;ENSG00000161800;ENSG00000163053;ENSG00000164687;ENSG00000167972;ENSG00000169583;ENSG00000184999…
GO:0006508	proteolysis	63	1917	0.00269489936529308	0.0410404763888956	ENSG00000005001;ENSG00000011422;ENSG00000074800;ENSG00000077274;ENSG00000077942;ENSG00000087245;ENSG00000088882;ENSG00000089685;ENSG00000095970;ENSG00000096088;ENSG00000100985;ENSG00000101443;ENSG00000109758;ENSG00000109846;ENSG00000109861;ENSG00000112818;ENSG00000117399;ENSG00000117525;ENSG00000118849;ENSG00000122861;ENSG00000123243;ENSG00000124102;ENSG00000129521;ENSG00000134057;ENSG00000136193…
GO:0032268	regulation of cellular protein metabolic process	83	2671	0.00270676104787718	0.0410404763888956	ENSG00000005001;ENSG00000005448;ENSG00000011422;ENSG00000046774;ENSG00000049130;ENSG00000051180;ENSG00000067225;ENSG00000070087;ENSG00000074800;ENSG00000077782;ENSG00000077942;ENSG00000088325;ENSG00000088992;ENSG00000089685;ENSG00000094804;ENSG00000095970;ENSG00000100985;ENSG00000101443;ENSG00000104341;ENSG00000105173;ENSG00000105894;ENSG00000107984;ENSG00000109846;ENSG00000109861;ENSG00000111206…
GO:0042098	T cell proliferation	12	202	0.00270881987015314	0.0410404763888956	ENSG00000102034;ENSG00000104951;ENSG00000106123;ENSG00000129654;ENSG00000130427;ENSG00000135077;ENSG00000139514;ENSG00000147889;ENSG00000150782;ENSG00000155659;ENSG00000186818;ENSG00000272398
GO:0045616	regulation of keratinocyte differentiation	5	42	0.00273541600480678	0.0413301926409331	ENSG00000054598;ENSG00000136943;ENSG00000175832;ENSG00000179593;ENSG00000221926
GO:0030335	positive regulation of cell migration	23	525	0.00274388648599954	0.0413452105383582	ENSG00000005884;ENSG00000049130;ENSG00000058085;ENSG00000075218;ENSG00000077782;ENSG00000077942;ENSG00000091136;ENSG00000095970;ENSG00000100985;ENSG00000102359;ENSG00000105894;ENSG00000117525;ENSG00000122861;ENSG00000133110;ENSG00000137673;ENSG00000146070;ENSG00000153071;ENSG00000157227;ENSG00000163191;ENSG00000164171;ENSG00000169429;ENSG00000176170;ENSG00000267795
GO:0098739	import across plasma membrane	10	151	0.00275969051130483	0.0414703492595535	ENSG00000069849;ENSG00000092068;ENSG00000105281;ENSG00000110195;ENSG00000116741;ENSG00000117394;ENSG00000131389;ENSG00000137731;ENSG00000139514;ENSG00000187688
GO:0072330	monocarboxylic acid biosynthetic process	17	343	0.00279506381239669	0.0418880836925574	ENSG00000038427;ENSG00000067057;ENSG00000067225;ENSG00000074800;ENSG00000083807;ENSG00000111674;ENSG00000130649;ENSG00000132965;ENSG00000140505;ENSG00000148344;ENSG00000149925;ENSG00000159399;ENSG00000160868;ENSG00000164181;ENSG00000164687;ENSG00000170525;ENSG00000179593
GO:0032835	glomerulus development	6	61	0.00282363640403413	0.0420881652676785	ENSG00000007062;ENSG00000054598;ENSG00000129654;ENSG00000137573;ENSG00000157483;ENSG00000272398
GO:0072413	signal transduction involved in mitotic cell cycle checkpoint	6	61	0.00282363640403413	0.0420881652676785	ENSG00000075218;ENSG00000124766;ENSG00000134057;ENSG00000170312;ENSG00000175793;ENSG00000185499
GO:0097205	renal filtration	4	26	0.00283205653167471	0.042100195215487	ENSG00000005884;ENSG00000051523;ENSG00000137573;ENSG00000157483
GO:0045927	positive regulation of growth	14	258	0.00287706949556524	0.0426546764355918	ENSG00000051523;ENSG00000106541;ENSG00000113758;ENSG00000128422;ENSG00000134057;ENSG00000143320;ENSG00000143546;ENSG00000157227;ENSG00000163220;ENSG00000170312;ENSG00000175793;ENSG00000176170;ENSG00000187688;ENSG00000275896
GO:0050727	regulation of inflammatory response	25	591	0.002906278571227	0.0429725147029018	ENSG00000080293;ENSG00000087494;ENSG00000092445;ENSG00000095970;ENSG00000100985;ENSG00000103222;ENSG00000109861;ENSG00000132965;ENSG00000140274;ENSG00000143226;ENSG00000143546;ENSG00000145623;ENSG00000146070;ENSG00000148344;ENSG00000150782;ENSG00000155659;ENSG00000163220;ENSG00000163687;ENSG00000164171;ENSG00000168078;ENSG00000176170;ENSG00000181751;ENSG00000186818;ENSG00000198535;ENSG00000203747
GO:0010454	negative regulation of cell fate commitment	3	13	0.00296846482636243	0.0433129564374254	ENSG00000107984;ENSG00000124664;ENSG00000155760
GO:0032530	regulation of microvillus organization	3	13	0.00296846482636243	0.0433129564374254	ENSG00000006611;ENSG00000075618;ENSG00000076864
GO:0045835	negative regulation of meiotic nuclear division	3	13	0.00296846482636243	0.0433129564374254	ENSG00000071539;ENSG00000112742;ENSG00000128342
GO:0072182	regulation of nephron tubule epithelial cell differentiation	3	13	0.00296846482636243	0.0433129564374254	ENSG00000007062;ENSG00000128342;ENSG00000272398
GO:1904668	positive regulation of ubiquitin protein ligase activity	3	13	0.00296846482636243	0.0433129564374254	ENSG00000117399;ENSG00000166851;ENSG00000175063
GO:0002586	regulation of antigen processing and presentation of peptide antigen via MHC class II	2	4	0.0031139167184669	0.0439284679926581	ENSG00000095970;ENSG00000204252
GO:0002835	negative regulation of response to tumor cell	2	4	0.0031139167184669	0.0439284679926581	ENSG00000104951;ENSG00000135077
GO:0002838	negative regulation of immune response to tumor cell	2	4	0.0031139167184669	0.0439284679926581	ENSG00000104951;ENSG00000135077
GO:0008315	G2/MI transition of meiotic cell cycle	2	4	0.0031139167184669	0.0439284679926581	ENSG00000157456;ENSG00000164045
GO:0019322	pentose biosynthetic process	2	4	0.0031139167184669	0.0439284679926581	ENSG00000160211;ENSG00000163931
GO:0032889	regulation of vacuole fusion, non-autophagic	2	4	0.0031139167184669	0.0439284679926581	ENSG00000074800;ENSG00000111674
GO:0043932	ossification involved in bone remodeling	2	4	0.0031139167184669	0.0439284679926581	ENSG00000105894;ENSG00000164932
GO:0051754	meiotic sister chromatid cohesion, centromeric	2	4	0.0031139167184669	0.0439284679926581	ENSG00000156970;ENSG00000169679
GO:0060480	lung goblet cell differentiation	2	4	0.0031139167184669	0.0439284679926581	ENSG00000106541;ENSG00000124664
GO:0150062	complement-mediated synapse pruning	2	4	0.0031139167184669	0.0439284679926581	ENSG00000095970;ENSG00000169896
GO:1905340	regulation of protein localization to kinetochore	2	4	0.0031139167184669	0.0439284679926581	ENSG00000080986;ENSG00000167513
GO:1905342	positive regulation of protein localization to kinetochore	2	4	0.0031139167184669	0.0439284679926581	ENSG00000080986;ENSG00000167513
GO:1905395	response to flavonoid	2	4	0.0031139167184669	0.0439284679926581	ENSG00000181019;ENSG00000214253
GO:0010817	regulation of hormone levels	24	563	0.00317453728761972	0.0446696977112903	ENSG00000085662;ENSG00000089685;ENSG00000092068;ENSG00000096433;ENSG00000100604;ENSG00000104951;ENSG00000106258;ENSG00000113739;ENSG00000117394;ENSG00000118785;ENSG00000124766;ENSG00000128342;ENSG00000139547;ENSG00000140274;ENSG00000140505;ENSG00000143320;ENSG00000145708;ENSG00000160868;ENSG00000167600;ENSG00000175003;ENSG00000175426;ENSG00000182240;ENSG00000197696;ENSG00000227471
GO:0045604	regulation of epidermal cell differentiation	6	63	0.00332436336272592	0.0465175795813737	ENSG00000054598;ENSG00000136943;ENSG00000175793;ENSG00000175832;ENSG00000179593;ENSG00000221926
GO:0046365	monosaccharide catabolic process	6	63	0.00332436336272592	0.0465175795813737	ENSG00000067057;ENSG00000067225;ENSG00000074800;ENSG00000111674;ENSG00000149925;ENSG00000159399
GO:0071158	positive regulation of cell cycle arrest	7	84	0.00333109611468788	0.0465175795813737	ENSG00000075218;ENSG00000124766;ENSG00000134057;ENSG00000147889;ENSG00000170312;ENSG00000175793;ENSG00000185499
GO:0089718	amino acid import across plasma membrane	5	44	0.00336292891649965	0.0468438209275645	ENSG00000092068;ENSG00000105281;ENSG00000116741;ENSG00000131389;ENSG00000139514
GO:0030199	collagen fibril organization	8	107	0.00343279010679433	0.0476968072627453	ENSG00000049089;ENSG00000054598;ENSG00000058085;ENSG00000113083;ENSG00000122176;ENSG00000132470;ENSG00000141756;ENSG00000163359
GO:0012501	programmed cell death	67	2090	0.00356878386982305	0.0494620922308809	ENSG00000011422;ENSG00000046604;ENSG00000049130;ENSG00000054598;ENSG00000067225;ENSG00000074800;ENSG00000077782;ENSG00000085662;ENSG00000088325;ENSG00000089685;ENSG00000092445;ENSG00000095970;ENSG00000100985;ENSG00000101057;ENSG00000104419;ENSG00000105894;ENSG00000107984;ENSG00000109846;ENSG00000109861;ENSG00000113083;ENSG00000114346;ENSG00000117525;ENSG00000120057;ENSG00000122133;ENSG00000124102…
GO:0015804	neutral amino acid transport	5	45	0.003712688230531	0.0507070332963789	ENSG00000092068;ENSG00000105281;ENSG00000111371;ENSG00000116741;ENSG00000131389
GO:0035987	endodermal cell differentiation	5	45	0.003712688230531	0.0507070332963789	ENSG00000087245;ENSG00000091136;ENSG00000100985;ENSG00000107984;ENSG00000157227
GO:0050798	activated T cell proliferation	5	45	0.003712688230531	0.0507070332963789	ENSG00000106123;ENSG00000130427;ENSG00000150782;ENSG00000186818;ENSG00000272398
GO:0070141	response to UV-A	3	14	0.00371362540416518	0.0507070332963789	ENSG00000087245;ENSG00000100985;ENSG00000196611
GO:0150078	positive regulation of neuroinflammatory response	3	14	0.00371362540416518	0.0507070332963789	ENSG00000095970;ENSG00000109861;ENSG00000150782
GO:1900025	negative regulation of substrate adhesion-dependent cell spreading	3	14	0.00371362540416518	0.0507070332963789	ENSG00000077942;ENSG00000133110;ENSG00000184292
GO:0034389	lipid droplet organization	4	28	0.00374002256925757	0.0509416867191979	ENSG00000135245;ENSG00000170509;ENSG00000187288;ENSG00000267795
GO:0009410	response to xenobiotic stimulus	15	295	0.00382435079479536	0.0519623093248608	ENSG00000075461;ENSG00000088826;ENSG00000106258;ENSG00000116741;ENSG00000130427;ENSG00000130649;ENSG00000140505;ENSG00000144959;ENSG00000145386;ENSG00000145708;ENSG00000160868;ENSG00000167600;ENSG00000181019;ENSG00000197838;ENSG00000198077
GO:0034446	substrate adhesion-dependent cell spreading	8	109	0.00384513533489608	0.0519892381466389	ENSG00000077942;ENSG00000091136;ENSG00000092445;ENSG00000092929;ENSG00000102837;ENSG00000133110;ENSG00000155760;ENSG00000184292
GO:0044774	mitotic DNA integrity checkpoint	8	109	0.00384513533489608	0.0519892381466389	ENSG00000075218;ENSG00000085840;ENSG00000094804;ENSG00000124766;ENSG00000134057;ENSG00000170312;ENSG00000175793;ENSG00000185499
GO:0006887	exocytosis	34	906	0.00395201610020495	0.0533040220344716	ENSG00000011422;ENSG00000019505;ENSG00000051523;ENSG00000067225;ENSG00000070087;ENSG00000092929;ENSG00000100604;ENSG00000100985;ENSG00000102837;ENSG00000106348;ENSG00000109861;ENSG00000122861;ENSG00000124491;ENSG00000133063;ENSG00000136193;ENSG00000141524;ENSG00000143226;ENSG00000143546;ENSG00000145685;ENSG00000145708;ENSG00000145920;ENSG00000149925;ENSG00000153395;ENSG00000158869;ENSG00000163191…
GO:0002376	immune system process	98	3292	0.00396790141252918	0.0533477864906788	ENSG00000005884;ENSG00000011422;ENSG00000049130;ENSG00000051523;ENSG00000054598;ENSG00000067225;ENSG00000069849;ENSG00000076864;ENSG00000080293;ENSG00000087494;ENSG00000088992;ENSG00000090104;ENSG00000090889;ENSG00000092068;ENSG00000092445;ENSG00000092929;ENSG00000095970;ENSG00000096088;ENSG00000100604;ENSG00000100985;ENSG00000101443;ENSG00000102034;ENSG00000102837;ENSG00000104419;ENSG00000104951…
GO:0009617	response to bacterium	28	704	0.00397455479822055	0.0533477864906788	ENSG00000051523;ENSG00000090104;ENSG00000095970;ENSG00000096088;ENSG00000100604;ENSG00000101443;ENSG00000124102;ENSG00000130427;ENSG00000130649;ENSG00000133063;ENSG00000135077;ENSG00000140505;ENSG00000143546;ENSG00000148344;ENSG00000150782;ENSG00000151365;ENSG00000158869;ENSG00000163220;ENSG00000163735;ENSG00000163739;ENSG00000166920;ENSG00000169429;ENSG00000174992;ENSG00000182195;ENSG00000211935…
GO:0017144	drug metabolic process	33	873	0.00403210510434909	0.0539892039395895	ENSG00000038427;ENSG00000051523;ENSG00000067057;ENSG00000067225;ENSG00000074800;ENSG00000083807;ENSG00000085662;ENSG00000088826;ENSG00000095970;ENSG00000103222;ENSG00000104951;ENSG00000106258;ENSG00000110195;ENSG00000111674;ENSG00000130649;ENSG00000133063;ENSG00000134057;ENSG00000140274;ENSG00000140505;ENSG00000146070;ENSG00000149925;ENSG00000159399;ENSG00000160868;ENSG00000162174;ENSG00000167600…
GO:0045861	negative regulation of proteolysis	17	356	0.00407098006916252	0.0543780671074124	ENSG00000011422;ENSG00000089685;ENSG00000100985;ENSG00000101443;ENSG00000109846;ENSG00000118849;ENSG00000123243;ENSG00000124102;ENSG00000147889;ENSG00000155659;ENSG00000163359;ENSG00000164611;ENSG00000168078;ENSG00000171199;ENSG00000172425;ENSG00000175793;ENSG00000221867
GO:0001933	negative regulation of protein phosphorylation	19	417	0.0041037497288548	0.0546837012061857	ENSG00000077942;ENSG00000088992;ENSG00000107984;ENSG00000111206;ENSG00000116741;ENSG00000124225;ENSG00000126259;ENSG00000128342;ENSG00000130829;ENSG00000134057;ENSG00000135549;ENSG00000147889;ENSG00000153233;ENSG00000154277;ENSG00000166851;ENSG00000168078;ENSG00000172425;ENSG00000175793;ENSG00000186818
GO:0043281	regulation of cysteine-type endopeptidase activity involved in apoptotic process	12	213	0.00415704954358383	0.0552607787885061	ENSG00000011422;ENSG00000089685;ENSG00000100985;ENSG00000109846;ENSG00000117525;ENSG00000129521;ENSG00000143546;ENSG00000147889;ENSG00000163220;ENSG00000175793;ENSG00000214253;ENSG00000221867
GO:2001242	regulation of intrinsic apoptotic signaling pathway	10	160	0.00417567920803141	0.0553753141976347	ENSG00000011422;ENSG00000074800;ENSG00000100985;ENSG00000130427;ENSG00000143546;ENSG00000157613;ENSG00000163220;ENSG00000185499;ENSG00000214253;ENSG00000221867
GO:0031571	mitotic G1 DNA damage checkpoint	6	66	0.00419556543491654	0.0555059254906422	ENSG00000075218;ENSG00000124766;ENSG00000134057;ENSG00000170312;ENSG00000175793;ENSG00000185499
GO:0071156	regulation of cell cycle arrest	8	111	0.00429473873344003	0.0565920869593457	ENSG00000075218;ENSG00000111206;ENSG00000124766;ENSG00000134057;ENSG00000147889;ENSG00000170312;ENSG00000175793;ENSG00000185499
GO:0044092	negative regulation of molecular function	41	1155	0.00430208552970373	0.0565920869593457	ENSG00000011422;ENSG00000053918;ENSG00000076864;ENSG00000088992;ENSG00000089685;ENSG00000100985;ENSG00000101443;ENSG00000105894;ENSG00000107984;ENSG00000109846;ENSG00000112559;ENSG00000116741;ENSG00000117650;ENSG00000118849;ENSG00000120057;ENSG00000123243;ENSG00000124102;ENSG00000129654;ENSG00000130427;ENSG00000130829;ENSG00000135077;ENSG00000135549;ENSG00000145708;ENSG00000147889;ENSG00000150551…
GO:0051781	positive regulation of cell division	7	88	0.00431653502613943	0.0565920869593457	ENSG00000094804;ENSG00000105894;ENSG00000114346;ENSG00000137807;ENSG00000143125;ENSG00000161800;ENSG00000178999
GO:0052548	regulation of endopeptidase activity	19	419	0.0043186004876752	0.0565920869593457	ENSG00000011422;ENSG00000089685;ENSG00000100985;ENSG00000101443;ENSG00000109846;ENSG00000117525;ENSG00000118849;ENSG00000123243;ENSG00000124102;ENSG00000129521;ENSG00000143546;ENSG00000147889;ENSG00000163220;ENSG00000163359;ENSG00000164611;ENSG00000171199;ENSG00000175793;ENSG00000214253;ENSG00000221867
GO:0010951	negative regulation of endopeptidase activity	13	242	0.00435909885982786	0.0569877463235179	ENSG00000011422;ENSG00000089685;ENSG00000100985;ENSG00000101443;ENSG00000109846;ENSG00000118849;ENSG00000123243;ENSG00000124102;ENSG00000163359;ENSG00000164611;ENSG00000171199;ENSG00000175793;ENSG00000221867
GO:0044783	G1 DNA damage checkpoint	6	67	0.00452031804642973	0.0587907970941973	ENSG00000075218;ENSG00000124766;ENSG00000134057;ENSG00000170312;ENSG00000175793;ENSG00000185499
GO:0044819	mitotic G1/S transition checkpoint	6	67	0.00452031804642973	0.0587907970941973	ENSG00000075218;ENSG00000124766;ENSG00000134057;ENSG00000170312;ENSG00000175793;ENSG00000185499
GO:0098657	import into cell	37	1018	0.00452891131322388	0.0587907970941973	ENSG00000005448;ENSG00000011028;ENSG00000051523;ENSG00000069849;ENSG00000075461;ENSG00000092068;ENSG00000092445;ENSG00000092929;ENSG00000095970;ENSG00000105281;ENSG00000107984;ENSG00000110195;ENSG00000111371;ENSG00000116701;ENSG00000116741;ENSG00000117394;ENSG00000131389;ENSG00000137731;ENSG00000139514;ENSG00000143226;ENSG00000147852;ENSG00000153071;ENSG00000157483;ENSG00000158869;ENSG00000160183…
GO:0006000	fructose metabolic process	3	15	0.00456297284411151	0.0588187408576612	ENSG00000085662;ENSG00000149925;ENSG00000170525
GO:0071474	cellular hyperosmotic response	3	15	0.00456297284411151	0.0588187408576612	ENSG00000085662;ENSG00000117394;ENSG00000130427
GO:0072160	nephron tubule epithelial cell differentiation	3	15	0.00456297284411151	0.0588187408576612	ENSG00000007062;ENSG00000128342;ENSG00000272398
GO:0045682	regulation of epidermis development	7	89	0.00459410859431354	0.0589593396440141	ENSG00000054598;ENSG00000128422;ENSG00000136943;ENSG00000175793;ENSG00000175832;ENSG00000179593;ENSG00000221926
GO:0045936	negative regulation of phosphate metabolic process	24	580	0.00459520350570887	0.0589593396440141	ENSG00000077942;ENSG00000088992;ENSG00000105894;ENSG00000107984;ENSG00000111206;ENSG00000116741;ENSG00000124225;ENSG00000126259;ENSG00000128342;ENSG00000130829;ENSG00000134057;ENSG00000135549;ENSG00000147889;ENSG00000153233;ENSG00000153395;ENSG00000154277;ENSG00000166143;ENSG00000166851;ENSG00000168078;ENSG00000172425;ENSG00000175793;ENSG00000186818;ENSG00000214253;ENSG00000225968
GO:0010563	negative regulation of phosphorus metabolic process	24	581	0.00469311874060251	0.0600762653600276	ENSG00000077942;ENSG00000088992;ENSG00000105894;ENSG00000107984;ENSG00000111206;ENSG00000116741;ENSG00000124225;ENSG00000126259;ENSG00000128342;ENSG00000130829;ENSG00000134057;ENSG00000135549;ENSG00000147889;ENSG00000153233;ENSG00000153395;ENSG00000154277;ENSG00000166143;ENSG00000166851;ENSG00000168078;ENSG00000172425;ENSG00000175793;ENSG00000186818;ENSG00000214253;ENSG00000225968
GO:0043085	positive regulation of catalytic activity	48	1412	0.004718039090053	0.0602557879168432	ENSG00000005001;ENSG00000035499;ENSG00000046774;ENSG00000049130;ENSG00000051523;ENSG00000069849;ENSG00000070087;ENSG00000076864;ENSG00000077782;ENSG00000077942;ENSG00000088325;ENSG00000090104;ENSG00000092445;ENSG00000094804;ENSG00000107984;ENSG00000114346;ENSG00000116741;ENSG00000117399;ENSG00000117525;ENSG00000117650;ENSG00000121152;ENSG00000129521;ENSG00000129654;ENSG00000130427;ENSG00000130829…
GO:0022603	regulation of anatomical structure morphogenesis	39	1091	0.00474126042955056	0.0603900074014536	ENSG00000054598;ENSG00000067225;ENSG00000076716;ENSG00000077942;ENSG00000091129;ENSG00000092929;ENSG00000095970;ENSG00000102359;ENSG00000102837;ENSG00000105894;ENSG00000107984;ENSG00000112655;ENSG00000113758;ENSG00000117525;ENSG00000118785;ENSG00000120057;ENSG00000128342;ENSG00000129654;ENSG00000133110;ENSG00000137285;ENSG00000137573;ENSG00000143125;ENSG00000143320;ENSG00000149925;ENSG00000153071…
GO:0006935	chemotaxis	26	647	0.00475038937063876	0.0603900074014536	ENSG00000011422;ENSG00000058085;ENSG00000076864;ENSG00000077782;ENSG00000091129;ENSG00000095970;ENSG00000100604;ENSG00000102007;ENSG00000103222;ENSG00000105894;ENSG00000112655;ENSG00000113083;ENSG00000117525;ENSG00000122861;ENSG00000137285;ENSG00000143546;ENSG00000146070;ENSG00000147852;ENSG00000151882;ENSG00000158747;ENSG00000158869;ENSG00000163220;ENSG00000163735;ENSG00000163739;ENSG00000164171…
GO:0097529	myeloid leukocyte migration	12	217	0.00481672465059741	0.0609462553536331	ENSG00000095970;ENSG00000100604;ENSG00000143546;ENSG00000146070;ENSG00000157227;ENSG00000158747;ENSG00000158869;ENSG00000163220;ENSG00000163735;ENSG00000163739;ENSG00000169347;ENSG00000169429
GO:0016049	cell growth	21	486	0.00481728283773413	0.0609462553536331	ENSG00000051523;ENSG00000074800;ENSG00000091129;ENSG00000109846;ENSG00000111206;ENSG00000113758;ENSG00000116741;ENSG00000118785;ENSG00000128422;ENSG00000133110;ENSG00000143320;ENSG00000143546;ENSG00000147889;ENSG00000157227;ENSG00000160211;ENSG00000163220;ENSG00000175793;ENSG00000176170;ENSG00000187688;ENSG00000204580;ENSG00000275896
GO:0002063	chondrocyte development	4	30	0.00482720792855177	0.0609462553536331	ENSG00000087494;ENSG00000137573;ENSG00000171310;ENSG00000178882
GO:0046686	response to cadmium ion	6	68	0.00486321944515587	0.0611169650743252	ENSG00000100985;ENSG00000140505;ENSG00000165168;ENSG00000169715;ENSG00000170312;ENSG00000187193
GO:0032465	regulation of cytokinesis	7	90	0.00488493644897861	0.0611169650743252	ENSG00000094804;ENSG00000112984;ENSG00000114346;ENSG00000137807;ENSG00000161800;ENSG00000166851;ENSG00000178999
GO:0034644	cellular response to UV	7	90	0.00488493644897861	0.0611169650743252	ENSG00000087245;ENSG00000100985;ENSG00000105894;ENSG00000164045;ENSG00000168078;ENSG00000178999;ENSG00000196611
GO:0046470	phosphatidylcholine metabolic process	7	90	0.00488493644897861	0.0611169650743252	ENSG00000005421;ENSG00000121316;ENSG00000146070;ENSG00000153395;ENSG00000164687;ENSG00000167972;ENSG00000176454
GO:1903580	positive regulation of ATP metabolic process	5	48	0.00491778133087704	0.0613890084870204	ENSG00000074800;ENSG00000095970;ENSG00000134057;ENSG00000170312;ENSG00000170525
GO:0065007	biological regulation	314	12535	0.00493741121978891	0.06149523433656	ENSG00000005001;ENSG00000005059;ENSG00000005421;ENSG00000005448;ENSG00000005884;ENSG00000006611;ENSG00000007062;ENSG00000011422;ENSG00000011426;ENSG00000013810;ENSG00000019505;ENSG00000021300;ENSG00000034510;ENSG00000035499;ENSG00000041982;ENSG00000046604;ENSG00000046774;ENSG00000049130;ENSG00000050344;ENSG00000051180;ENSG00000051523;ENSG00000053918;ENSG00000054179;ENSG00000054598;ENSG00000058085…
GO:0042330	taxis	26	650	0.00504025863204738	0.0616943160975532	ENSG00000011422;ENSG00000058085;ENSG00000076864;ENSG00000077782;ENSG00000091129;ENSG00000095970;ENSG00000100604;ENSG00000102007;ENSG00000103222;ENSG00000105894;ENSG00000112655;ENSG00000113083;ENSG00000117525;ENSG00000122861;ENSG00000137285;ENSG00000143546;ENSG00000146070;ENSG00000147852;ENSG00000151882;ENSG00000158747;ENSG00000158869;ENSG00000163220;ENSG00000163735;ENSG00000163739;ENSG00000164171…
GO:0002580	regulation of antigen processing and presentation of peptide or polysaccharide antigen via MHC class II	2	5	0.00511040176948362	0.0616943160975532	ENSG00000095970;ENSG00000204252
GO:0009996	negative regulation of cell fate specification	2	5	0.00511040176948362	0.0616943160975532	ENSG00000107984;ENSG00000155760
GO:0010041	response to iron(III) ion	2	5	0.00511040176948362	0.0616943160975532	ENSG00000134057;ENSG00000160211
GO:0016321	female meiosis chromosome segregation	2	5	0.00511040176948362	0.0616943160975532	ENSG00000112742;ENSG00000166851
GO:0031536	positive regulation of exit from mitosis	2	5	0.00511040176948362	0.0616943160975532	ENSG00000146670;ENSG00000175063
GO:0035905	ascending aorta development	2	5	0.00511040176948362	0.0616943160975532	ENSG00000113083;ENSG00000124766
GO:0042144	vacuole fusion, non-autophagic	2	5	0.00511040176948362	0.0616943160975532	ENSG00000074800;ENSG00000111674
GO:0060481	lobar bronchus epithelium development	2	5	0.00511040176948362	0.0616943160975532	ENSG00000106541;ENSG00000124664
GO:0061181	regulation of chondrocyte development	2	5	0.00511040176948362	0.0616943160975532	ENSG00000087494;ENSG00000178882
GO:0097576	vacuole fusion	2	5	0.00511040176948362	0.0616943160975532	ENSG00000074800;ENSG00000111674
GO:1901534	positive regulation of hematopoietic progenitor cell differentiation	2	5	0.00511040176948362	0.0616943160975532	ENSG00000049130;ENSG00000054598
GO:1902617	response to fluoride	2	5	0.00511040176948362	0.0616943160975532	ENSG00000005421;ENSG00000214253
GO:1990834	response to odorant	2	5	0.00511040176948362	0.0616943160975532	ENSG00000136943;ENSG00000157227
GO:0072073	kidney epithelium development	9	139	0.0051207397990555	0.0616943160975532	ENSG00000007062;ENSG00000054598;ENSG00000128342;ENSG00000129654;ENSG00000157483;ENSG00000168743;ENSG00000184292;ENSG00000260027;ENSG00000272398
GO:1902749	regulation of cell cycle G2/M phase transition	12	219	0.00517655652255437	0.0622312121080993	ENSG00000075218;ENSG00000085840;ENSG00000088325;ENSG00000094804;ENSG00000117650;ENSG00000117724;ENSG00000134057;ENSG00000147889;ENSG00000164045;ENSG00000166851;ENSG00000170312;ENSG00000178999
GO:0051146	striated muscle cell differentiation	14	276	0.00522113585501198	0.062630978911532	ENSG00000107984;ENSG00000113083;ENSG00000116741;ENSG00000123095;ENSG00000128591;ENSG00000134057;ENSG00000138119;ENSG00000154277;ENSG00000155760;ENSG00000157227;ENSG00000160211;ENSG00000170312;ENSG00000171345;ENSG00000187957
GO:0065008	regulation of biological quality	119	4160	0.00528598923422751	0.0632380735189059	ENSG00000005059;ENSG00000006611;ENSG00000007062;ENSG00000011422;ENSG00000034510;ENSG00000046604;ENSG00000049130;ENSG00000051180;ENSG00000051523;ENSG00000053918;ENSG00000054179;ENSG00000054598;ENSG00000069849;ENSG00000070087;ENSG00000074410;ENSG00000075218;ENSG00000075461;ENSG00000076716;ENSG00000077942;ENSG00000080293;ENSG00000085662;ENSG00000088992;ENSG00000089685;ENSG00000091129;ENSG00000092068…
GO:0030855	epithelial cell differentiation	30	787	0.00533351278599167	0.0632380735189059	ENSG00000006611;ENSG00000007062;ENSG00000046604;ENSG00000054598;ENSG00000085662;ENSG00000100985;ENSG00000105894;ENSG00000106541;ENSG00000112655;ENSG00000117148;ENSG00000124102;ENSG00000124429;ENSG00000124664;ENSG00000124766;ENSG00000128342;ENSG00000128422;ENSG00000129654;ENSG00000136943;ENSG00000153071;ENSG00000155760;ENSG00000157483;ENSG00000164171;ENSG00000167767;ENSG00000170312;ENSG00000171345…
GO:0042063	gliogenesis	15	306	0.00534274082055979	0.0632380735189059	ENSG00000038427;ENSG00000091136;ENSG00000095970;ENSG00000104419;ENSG00000105894;ENSG00000124766;ENSG00000128342;ENSG00000132470;ENSG00000143546;ENSG00000157227;ENSG00000163220;ENSG00000170312;ENSG00000182240;ENSG00000187957;ENSG00000244405
GO:0031400	negative regulation of protein modification process	25	620	0.00534438146522616	0.0632380735189059	ENSG00000077942;ENSG00000088992;ENSG00000105894;ENSG00000107984;ENSG00000111206;ENSG00000116741;ENSG00000124225;ENSG00000124766;ENSG00000126259;ENSG00000128342;ENSG00000130829;ENSG00000134057;ENSG00000135549;ENSG00000147889;ENSG00000153233;ENSG00000154277;ENSG00000160211;ENSG00000164109;ENSG00000166143;ENSG00000166851;ENSG00000168078;ENSG00000172425;ENSG00000175793;ENSG00000186818;ENSG00000225968
GO:0007167	enzyme linked receptor protein signaling pathway	38	1064	0.00536343496522654	0.0632380735189059	ENSG00000005448;ENSG00000005884;ENSG00000011422;ENSG00000051523;ENSG00000054598;ENSG00000077782;ENSG00000087245;ENSG00000092445;ENSG00000100985;ENSG00000105894;ENSG00000106123;ENSG00000106541;ENSG00000107984;ENSG00000110195;ENSG00000112742;ENSG00000113083;ENSG00000116701;ENSG00000117525;ENSG00000120057;ENSG00000122176;ENSG00000124225;ENSG00000128342;ENSG00000137573;ENSG00000144959;ENSG00000145623…
GO:0030334	regulation of cell migration	33	890	0.00537314641036983	0.0632380735189059	ENSG00000005884;ENSG00000034510;ENSG00000049130;ENSG00000058085;ENSG00000070087;ENSG00000075218;ENSG00000077782;ENSG00000077942;ENSG00000091136;ENSG00000095970;ENSG00000100985;ENSG00000102359;ENSG00000105894;ENSG00000117525;ENSG00000122861;ENSG00000133110;ENSG00000137573;ENSG00000137673;ENSG00000139146;ENSG00000146070;ENSG00000151882;ENSG00000153071;ENSG00000153233;ENSG00000157227;ENSG00000158747…
GO:0006270	DNA replication initiation	5	49	0.00537466447629037	0.0632380735189059	ENSG00000085840;ENSG00000093009;ENSG00000094804;ENSG00000105173;ENSG00000167513
GO:0043090	amino acid import	5	49	0.00537466447629037	0.0632380735189059	ENSG00000092068;ENSG00000105281;ENSG00000116741;ENSG00000131389;ENSG00000139514
GO:0048146	positive regulation of fibroblast proliferation	5	49	0.00537466447629037	0.0632380735189059	ENSG00000077942;ENSG00000094804;ENSG00000134057;ENSG00000145386;ENSG00000176170
GO:0050789	regulation of biological process	298	11817	0.00539844505452965	0.0633641092053593	ENSG00000005001;ENSG00000005421;ENSG00000005448;ENSG00000005884;ENSG00000006611;ENSG00000007062;ENSG00000011422;ENSG00000011426;ENSG00000013810;ENSG00000019505;ENSG00000021300;ENSG00000034510;ENSG00000035499;ENSG00000041982;ENSG00000046604;ENSG00000046774;ENSG00000049130;ENSG00000050344;ENSG00000051180;ENSG00000051523;ENSG00000053918;ENSG00000054179;ENSG00000054598;ENSG00000058085;ENSG00000067225…
GO:0060429	epithelium development	45	1314	0.00541734496456984	0.0633641092053593	ENSG00000006611;ENSG00000007062;ENSG00000041982;ENSG00000046604;ENSG00000054598;ENSG00000076716;ENSG00000085662;ENSG00000100985;ENSG00000105894;ENSG00000106541;ENSG00000107159;ENSG00000107984;ENSG00000110195;ENSG00000112655;ENSG00000117148;ENSG00000124102;ENSG00000124429;ENSG00000124664;ENSG00000124766;ENSG00000128342;ENSG00000128422;ENSG00000129654;ENSG00000136943;ENSG00000137573;ENSG00000153071…
GO:0048519	negative regulation of biological process	156	5673	0.005426924703181	0.0633641092053593	ENSG00000005448;ENSG00000005884;ENSG00000011422;ENSG00000034510;ENSG00000041982;ENSG00000049130;ENSG00000050344;ENSG00000051180;ENSG00000051523;ENSG00000053918;ENSG00000054598;ENSG00000068489;ENSG00000069011;ENSG00000070087;ENSG00000071539;ENSG00000074800;ENSG00000075218;ENSG00000076864;ENSG00000077942;ENSG00000080293;ENSG00000080986;ENSG00000085662;ENSG00000085840;ENSG00000087494;ENSG00000088325…
GO:0048333	mesodermal cell differentiation	4	31	0.00544266760805528	0.0633641092053593	ENSG00000005884;ENSG00000107984;ENSG00000132470;ENSG00000164171
GO:0071295	cellular response to vitamin	4	31	0.00544266760805528	0.0633641092053593	ENSG00000041982;ENSG00000105894;ENSG00000110195;ENSG00000133110
GO:0019220	regulation of phosphate metabolic process	59	1829	0.00551119028573605	0.0636000068936276	ENSG00000005448;ENSG00000011422;ENSG00000049130;ENSG00000051180;ENSG00000070087;ENSG00000074800;ENSG00000077782;ENSG00000077942;ENSG00000088325;ENSG00000088992;ENSG00000092445;ENSG00000094804;ENSG00000095970;ENSG00000100985;ENSG00000102359;ENSG00000105173;ENSG00000105894;ENSG00000107984;ENSG00000111206;ENSG00000112742;ENSG00000113083;ENSG00000114346;ENSG00000116741;ENSG00000124225;ENSG00000126259…
GO:0051174	regulation of phosphorus metabolic process	59	1829	0.00551119028573605	0.0636000068936276	ENSG00000005448;ENSG00000011422;ENSG00000049130;ENSG00000051180;ENSG00000070087;ENSG00000074800;ENSG00000077782;ENSG00000077942;ENSG00000088325;ENSG00000088992;ENSG00000092445;ENSG00000094804;ENSG00000095970;ENSG00000100985;ENSG00000102359;ENSG00000105173;ENSG00000105894;ENSG00000107984;ENSG00000111206;ENSG00000112742;ENSG00000113083;ENSG00000114346;ENSG00000116741;ENSG00000124225;ENSG00000126259…
GO:0019372	lipoxygenase pathway	3	16	0.00552043459474526	0.0636000068936276	ENSG00000005421;ENSG00000132965;ENSG00000179593
GO:0045989	positive regulation of striated muscle contraction	3	16	0.00552043459474526	0.0636000068936276	ENSG00000053918;ENSG00000100604;ENSG00000116741
GO:1902969	mitotic DNA replication	3	16	0.00552043459474526	0.0636000068936276	ENSG00000051180;ENSG00000093009;ENSG00000101003
GO:0042130	negative regulation of T cell proliferation	6	70	0.00560580803074722	0.0644334529858466	ENSG00000104951;ENSG00000129654;ENSG00000135077;ENSG00000147889;ENSG00000155659;ENSG00000186818
GO:0045471	response to ethanol	9	141	0.00561608035066511	0.0644334529858466	ENSG00000041982;ENSG00000116741;ENSG00000130649;ENSG00000143546;ENSG00000145708;ENSG00000160211;ENSG00000165168;ENSG00000170312;ENSG00000181019
GO:0010466	negative regulation of peptidase activity	13	250	0.00570447797703011	0.0653121391573012	ENSG00000011422;ENSG00000089685;ENSG00000100985;ENSG00000101443;ENSG00000109846;ENSG00000118849;ENSG00000123243;ENSG00000124102;ENSG00000163359;ENSG00000164611;ENSG00000171199;ENSG00000175793;ENSG00000221867
GO:0019362	pyridine nucleotide metabolic process	11	195	0.00588999185612324	0.0671580514729104	ENSG00000067057;ENSG00000067225;ENSG00000074800;ENSG00000111674;ENSG00000149925;ENSG00000159399;ENSG00000160211;ENSG00000163931;ENSG00000170525;ENSG00000181019;ENSG00000204653
GO:0046496	nicotinamide nucleotide metabolic process	11	195	0.00588999185612324	0.0671580514729104	ENSG00000067057;ENSG00000067225;ENSG00000074800;ENSG00000111674;ENSG00000149925;ENSG00000159399;ENSG00000160211;ENSG00000163931;ENSG00000170525;ENSG00000181019;ENSG00000204653
GO:0071214	cellular response to abiotic stimulus	16	340	0.00600916103996866	0.068235442609911	ENSG00000051180;ENSG00000051523;ENSG00000085662;ENSG00000087245;ENSG00000100985;ENSG00000105894;ENSG00000109846;ENSG00000114346;ENSG00000117394;ENSG00000130427;ENSG00000137673;ENSG00000164045;ENSG00000164171;ENSG00000168078;ENSG00000178999;ENSG00000196611
GO:0104004	cellular response to environmental stimulus	16	340	0.00600916103996866	0.068235442609911	ENSG00000051180;ENSG00000051523;ENSG00000085662;ENSG00000087245;ENSG00000100985;ENSG00000105894;ENSG00000109846;ENSG00000114346;ENSG00000117394;ENSG00000130427;ENSG00000137673;ENSG00000164045;ENSG00000164171;ENSG00000168078;ENSG00000178999;ENSG00000196611
GO:0048513	animal organ development	106	3656	0.00602327991405955	0.0682556105015355	ENSG00000005884;ENSG00000006611;ENSG00000007062;ENSG00000013810;ENSG00000041982;ENSG00000046604;ENSG00000049130;ENSG00000053918;ENSG00000054598;ENSG00000058085;ENSG00000069011;ENSG00000076716;ENSG00000076864;ENSG00000077782;ENSG00000079462;ENSG00000080293;ENSG00000085662;ENSG00000087245;ENSG00000087494;ENSG00000088992;ENSG00000091136;ENSG00000092445;ENSG00000095970;ENSG00000100122;ENSG00000100985…
GO:2000027	regulation of animal organ morphogenesis	13	252	0.00608794425397586	0.0688473041400542	ENSG00000054598;ENSG00000076716;ENSG00000105894;ENSG00000107984;ENSG00000112655;ENSG00000128342;ENSG00000137573;ENSG00000153071;ENSG00000155760;ENSG00000164761;ENSG00000164932;ENSG00000184292;ENSG00000260027
GO:0042759	long-chain fatty acid biosynthetic process	4	32	0.00610841162012146	0.0689377882842279	ENSG00000130649;ENSG00000140505;ENSG00000160868;ENSG00000179593
GO:0007586	digestion	9	143	0.00614766173014313	0.0692394488140356	ENSG00000053918;ENSG00000096088;ENSG00000133063;ENSG00000140297;ENSG00000160181;ENSG00000160182;ENSG00000166391;ENSG00000204583;ENSG00000275896
GO:0060993	kidney morphogenesis	7	94	0.00618857128810865	0.0695585350065871	ENSG00000124766;ENSG00000128342;ENSG00000129654;ENSG00000140297;ENSG00000168743;ENSG00000184292;ENSG00000260027
GO:0009719	response to endogenous stimulus	55	1691	0.00624176222108294	0.0700140873886179	ENSG00000005884;ENSG00000041982;ENSG00000051180;ENSG00000051523;ENSG00000053918;ENSG00000054598;ENSG00000067225;ENSG00000076864;ENSG00000077782;ENSG00000085662;ENSG00000087245;ENSG00000094804;ENSG00000095970;ENSG00000103222;ENSG00000104435;ENSG00000105894;ENSG00000107159;ENSG00000109846;ENSG00000110195;ENSG00000113083;ENSG00000113739;ENSG00000117394;ENSG00000118785;ENSG00000120057;ENSG00000122176…
GO:0071478	cellular response to radiation	11	197	0.00634598977360001	0.0710391162915143	ENSG00000051180;ENSG00000051523;ENSG00000087245;ENSG00000100985;ENSG00000105894;ENSG00000109846;ENSG00000114346;ENSG00000164045;ENSG00000168078;ENSG00000178999;ENSG00000196611
GO:0048729	tissue morphogenesis	26	663	0.006472978543043	0.0723142855414703	ENSG00000005884;ENSG00000041982;ENSG00000054598;ENSG00000076716;ENSG00000107159;ENSG00000107984;ENSG00000110195;ENSG00000112655;ENSG00000124766;ENSG00000128342;ENSG00000128422;ENSG00000132470;ENSG00000137573;ENSG00000140297;ENSG00000153071;ENSG00000155760;ENSG00000157227;ENSG00000164171;ENSG00000164379;ENSG00000164932;ENSG00000168743;ENSG00000184292;ENSG00000204580;ENSG00000206557;ENSG00000260027…
GO:0050665	hydrogen peroxide biosynthetic process	3	17	0.00658949180750227	0.0730855011649653	ENSG00000051523;ENSG00000140274;ENSG00000140505
GO:1900424	regulation of defense response to bacterium	3	17	0.00658949180750227	0.0730855011649653	ENSG00000051523;ENSG00000096088;ENSG00000135077
GO:1904355	positive regulation of telomere capping	3	17	0.00658949180750227	0.0730855011649653	ENSG00000117650;ENSG00000135549;ENSG00000178999
GO:0045666	positive regulation of neuron differentiation	17	374	0.00659487614490374	0.0730855011649653	ENSG00000005884;ENSG00000077782;ENSG00000091129;ENSG00000104435;ENSG00000105894;ENSG00000112655;ENSG00000113758;ENSG00000114346;ENSG00000116741;ENSG00000130427;ENSG00000137285;ENSG00000143320;ENSG00000147852;ENSG00000158747;ENSG00000163220;ENSG00000187688;ENSG00000244405
GO:0051704	multi-organism process	85	2840	0.00663759143753395	0.0733266900837514	ENSG00000005884;ENSG00000051523;ENSG00000054598;ENSG00000071539;ENSG00000074800;ENSG00000077942;ENSG00000079462;ENSG00000085662;ENSG00000087245;ENSG00000087494;ENSG00000090104;ENSG00000092445;ENSG00000092929;ENSG00000095970;ENSG00000096088;ENSG00000100604;ENSG00000100985;ENSG00000101443;ENSG00000104723;ENSG00000105281;ENSG00000105894;ENSG00000110195;ENSG00000111371;ENSG00000112742;ENSG00000113739…
GO:0042060	wound healing	24	598	0.00664315944520063	0.0733266900837514	ENSG00000011422;ENSG00000041982;ENSG00000054179;ENSG00000077942;ENSG00000092445;ENSG00000096433;ENSG00000105894;ENSG00000109758;ENSG00000112655;ENSG00000113083;ENSG00000117525;ENSG00000122861;ENSG00000124491;ENSG00000133110;ENSG00000134057;ENSG00000138119;ENSG00000141756;ENSG00000143546;ENSG00000153933;ENSG00000155760;ENSG00000158869;ENSG00000164171;ENSG00000204580;ENSG00000262406
GO:0007292	female gamete generation	9	145	0.00671717393538512	0.0739959598858162	ENSG00000071539;ENSG00000105894;ENSG00000112742;ENSG00000116741;ENSG00000131747;ENSG00000134057;ENSG00000137819;ENSG00000157456;ENSG00000166851
GO:0042325	regulation of phosphorylation	53	1624	0.0067848506270273	0.0745928905913737	ENSG00000005448;ENSG00000011422;ENSG00000049130;ENSG00000051180;ENSG00000070087;ENSG00000077782;ENSG00000077942;ENSG00000088325;ENSG00000088992;ENSG00000092445;ENSG00000094804;ENSG00000095970;ENSG00000100985;ENSG00000102359;ENSG00000105173;ENSG00000107984;ENSG00000111206;ENSG00000112742;ENSG00000113083;ENSG00000114346;ENSG00000116741;ENSG00000124225;ENSG00000126259;ENSG00000128342;ENSG00000130427…
GO:0042573	retinoic acid metabolic process	4	33	0.00682614422018762	0.0746019318925643	ENSG00000106258;ENSG00000143320;ENSG00000160868;ENSG00000167600
GO:0055026	negative regulation of cardiac muscle tissue development	4	33	0.00682614422018762	0.0746019318925643	ENSG00000107984;ENSG00000116741;ENSG00000155760;ENSG00000160211
GO:0110111	negative regulation of animal organ morphogenesis	4	33	0.00682614422018762	0.0746019318925643	ENSG00000054598;ENSG00000137573;ENSG00000164761;ENSG00000184292
GO:0031670	cellular response to nutrient	6	73	0.00687041273561945	0.0749338850784882	ENSG00000041982;ENSG00000051523;ENSG00000105894;ENSG00000110195;ENSG00000133110;ENSG00000165168
GO:0090092	regulation of transmembrane receptor protein serine/threonine kinase signaling pathway	13	256	0.00691646349010086	0.0749338850784882	ENSG00000005884;ENSG00000107984;ENSG00000110195;ENSG00000112742;ENSG00000113083;ENSG00000120057;ENSG00000124225;ENSG00000137573;ENSG00000153071;ENSG00000158747;ENSG00000168743;ENSG00000170801;ENSG00000171310
GO:0051293	establishment of spindle localization	5	52	0.00692427039332865	0.0749338850784882	ENSG00000080986;ENSG00000099812;ENSG00000115163;ENSG00000164109;ENSG00000166851
GO:0051445	regulation of meiotic cell cycle	5	52	0.00692427039332865	0.0749338850784882	ENSG00000071539;ENSG00000112742;ENSG00000117399;ENSG00000128342;ENSG00000164045
GO:0061900	glial cell activation	5	52	0.00692427039332865	0.0749338850784882	ENSG00000095970;ENSG00000109861;ENSG00000169896;ENSG00000176170;ENSG00000182240
GO:0032940	secretion by cell	45	1334	0.00706244506145086	0.0762799241988735	ENSG00000011422;ENSG00000019505;ENSG00000051523;ENSG00000067225;ENSG00000070087;ENSG00000089685;ENSG00000092445;ENSG00000092929;ENSG00000095970;ENSG00000096433;ENSG00000100604;ENSG00000100985;ENSG00000102837;ENSG00000105281;ENSG00000106348;ENSG00000109861;ENSG00000117394;ENSG00000118785;ENSG00000122861;ENSG00000124491;ENSG00000124766;ENSG00000128342;ENSG00000133063;ENSG00000136193;ENSG00000141524…
GO:0006022	aminoglycan metabolic process	10	173	0.00716971383539558	0.0769874126402671	ENSG00000038427;ENSG00000054598;ENSG00000076716;ENSG00000122176;ENSG00000123243;ENSG00000133063;ENSG00000156966;ENSG00000171310;ENSG00000175040;ENSG00000237172
GO:0042129	regulation of T cell proliferation	10	173	0.00716971383539558	0.0769874126402671	ENSG00000104951;ENSG00000129654;ENSG00000130427;ENSG00000135077;ENSG00000139514;ENSG00000147889;ENSG00000150782;ENSG00000155659;ENSG00000186818;ENSG00000272398
GO:0055001	muscle cell development	10	173	0.00716971383539558	0.0769874126402671	ENSG00000113083;ENSG00000116741;ENSG00000128591;ENSG00000134057;ENSG00000138119;ENSG00000154277;ENSG00000160211;ENSG00000170312;ENSG00000171345;ENSG00000187957
GO:1990868	response to chemokine	7	97	0.0073245986201296	0.0780670885037582	ENSG00000054598;ENSG00000095970;ENSG00000113083;ENSG00000160181;ENSG00000163735;ENSG00000163739;ENSG00000169429
GO:1990869	cellular response to chemokine	7	97	0.0073245986201296	0.0780670885037582	ENSG00000054598;ENSG00000095970;ENSG00000113083;ENSG00000160181;ENSG00000163735;ENSG00000163739;ENSG00000169429
GO:2001243	negative regulation of intrinsic apoptotic signaling pathway	7	97	0.0073245986201296	0.0780670885037582	ENSG00000011422;ENSG00000074800;ENSG00000100985;ENSG00000130427;ENSG00000157613;ENSG00000185499;ENSG00000221867
GO:0071456	cellular response to hypoxia	11	201	0.00734084738190855	0.0780670885037582	ENSG00000074800;ENSG00000104419;ENSG00000105894;ENSG00000107159;ENSG00000113739;ENSG00000129521;ENSG00000130427;ENSG00000134057;ENSG00000135245;ENSG00000145386;ENSG00000165168
GO:0072524	pyridine-containing compound metabolic process	11	201	0.00734084738190855	0.0780670885037582	ENSG00000067057;ENSG00000067225;ENSG00000074800;ENSG00000111674;ENSG00000149925;ENSG00000159399;ENSG00000160211;ENSG00000163931;ENSG00000170525;ENSG00000181019;ENSG00000204653
GO:0030162	regulation of proteolysis	31	841	0.00745967391857879	0.0783170924468612	ENSG00000005001;ENSG00000011422;ENSG00000074800;ENSG00000077942;ENSG00000089685;ENSG00000095970;ENSG00000100985;ENSG00000101443;ENSG00000109846;ENSG00000109861;ENSG00000117399;ENSG00000117525;ENSG00000118849;ENSG00000123243;ENSG00000124102;ENSG00000129521;ENSG00000143546;ENSG00000147889;ENSG00000153071;ENSG00000155659;ENSG00000157227;ENSG00000163220;ENSG00000163359;ENSG00000164611;ENSG00000166851…
GO:0072359	circulatory system development	38	1087	0.00751734349294852	0.0783170924468612	ENSG00000005884;ENSG00000046604;ENSG00000053918;ENSG00000054598;ENSG00000067225;ENSG00000087245;ENSG00000091129;ENSG00000102359;ENSG00000105894;ENSG00000107984;ENSG00000110195;ENSG00000112655;ENSG00000113083;ENSG00000116741;ENSG00000117525;ENSG00000122870;ENSG00000124766;ENSG00000128342;ENSG00000129654;ENSG00000130829;ENSG00000134057;ENSG00000137573;ENSG00000141756;ENSG00000143125;ENSG00000150782…
GO:0002583	regulation of antigen processing and presentation of peptide antigen	2	6	0.00754846478737378	0.0783170924468612	ENSG00000095970;ENSG00000204252
GO:0010668	ectodermal cell differentiation	2	6	0.00754846478737378	0.0783170924468612	ENSG00000155760;ENSG00000169896
GO:0010694	positive regulation of alkaline phosphatase activity	2	6	0.00754846478737378	0.0783170924468612	ENSG00000164171;ENSG00000168743
GO:0032534	regulation of microvillus assembly	2	6	0.00754846478737378	0.0783170924468612	ENSG00000075618;ENSG00000076864
GO:0051987	positive regulation of attachment of spindle microtubules to kinetochore	2	6	0.00754846478737378	0.0783170924468612	ENSG00000134057;ENSG00000178999
GO:0060482	lobar bronchus development	2	6	0.00754846478737378	0.0783170924468612	ENSG00000106541;ENSG00000124664
GO:0061302	smooth muscle cell-matrix adhesion	2	6	0.00754846478737378	0.0783170924468612	ENSG00000122861;ENSG00000204580
GO:1990962	drug transport across blood-brain barrier	2	6	0.00754846478737378	0.0783170924468612	ENSG00000103222;ENSG00000175003
GO:2000523	regulation of T cell costimulation	2	6	0.00754846478737378	0.0783170924468612	ENSG00000106123;ENSG00000186818
GO:2000542	negative regulation of gastrulation	2	6	0.00754846478737378	0.0783170924468612	ENSG00000107984;ENSG00000155760
GO:2001268	negative regulation of cysteine-type endopeptidase activity involved in apoptotic signaling pathway	2	6	0.00754846478737378	0.0783170924468612	ENSG00000011422;ENSG00000100985
GO:0051443	positive regulation of ubiquitin-protein transferase activity	4	34	0.00759750615676803	0.0783847183711329	ENSG00000046774;ENSG00000117399;ENSG00000166851;ENSG00000175063
GO:1901976	regulation of cell cycle checkpoint	4	34	0.00759750615676803	0.0783847183711329	ENSG00000080986;ENSG00000134057;ENSG00000164109;ENSG00000167513
GO:2000725	regulation of cardiac muscle cell differentiation	4	34	0.00759750615676803	0.0783847183711329	ENSG00000107984;ENSG00000116741;ENSG00000155760;ENSG00000160211
GO:0002643	regulation of tolerance induction	3	18	0.00777320258180347	0.0796033523655059	ENSG00000129654;ENSG00000135077;ENSG00000186818
GO:0051382	kinetochore assembly	3	18	0.00777320258180347	0.0796033523655059	ENSG00000115163;ENSG00000117724;ENSG00000126787
GO:0051447	negative regulation of meiotic cell cycle	3	18	0.00777320258180347	0.0796033523655059	ENSG00000071539;ENSG00000112742;ENSG00000128342
GO:1903978	regulation of microglial cell activation	3	18	0.00777320258180347	0.0796033523655059	ENSG00000095970;ENSG00000109861;ENSG00000176170
GO:0051785	positive regulation of nuclear division	6	75	0.00782073542372143	0.0799420829818475	ENSG00000126787;ENSG00000146670;ENSG00000167513;ENSG00000175063;ENSG00000176170;ENSG00000178999
GO:0010389	regulation of G2/M transition of mitotic cell cycle	11	203	0.00788187331597749	0.0804183753456744	ENSG00000085840;ENSG00000088325;ENSG00000094804;ENSG00000117650;ENSG00000117724;ENSG00000134057;ENSG00000147889;ENSG00000164045;ENSG00000166851;ENSG00000170312;ENSG00000178999
GO:0097193	intrinsic apoptotic signaling pathway	14	290	0.00795016696831858	0.0809657888302058	ENSG00000011422;ENSG00000074800;ENSG00000100985;ENSG00000130427;ENSG00000143546;ENSG00000147889;ENSG00000157613;ENSG00000163220;ENSG00000165304;ENSG00000175793;ENSG00000185499;ENSG00000214253;ENSG00000221867;ENSG00000272398
GO:0006959	humoral immune response	17	382	0.00806454532958048	0.081979661162831	ENSG00000095970;ENSG00000096088;ENSG00000100604;ENSG00000101443;ENSG00000124102;ENSG00000129654;ENSG00000143546;ENSG00000155659;ENSG00000163220;ENSG00000163735;ENSG00000163739;ENSG00000169429;ENSG00000174371;ENSG00000211935;ENSG00000211950;ENSG00000232216;ENSG00000275896
GO:0001706	endoderm formation	5	54	0.00811578831983982	0.0823491915756224	ENSG00000087245;ENSG00000091136;ENSG00000100985;ENSG00000107984;ENSG00000157227
GO:0017015	regulation of transforming growth factor beta receptor signaling pathway	8	124	0.00827683655734799	0.0838294984654476	ENSG00000005884;ENSG00000110195;ENSG00000113083;ENSG00000124225;ENSG00000153071;ENSG00000168743;ENSG00000170801;ENSG00000171310
GO:0055024	regulation of cardiac muscle tissue development	6	76	0.00832979722366636	0.0842116611460237	ENSG00000107984;ENSG00000116741;ENSG00000134057;ENSG00000155760;ENSG00000160211;ENSG00000170312
GO:0009404	toxin metabolic process	4	35	0.00842407246205165	0.084700219482083	ENSG00000106258;ENSG00000140505;ENSG00000160868;ENSG00000197838
GO:0033280	response to vitamin D	4	35	0.00842407246205165	0.084700219482083	ENSG00000041982;ENSG00000105894;ENSG00000113739;ENSG00000118785
GO:0045730	respiratory burst	4	35	0.00842407246205165	0.084700219482083	ENSG00000051523;ENSG00000116701;ENSG00000165168;ENSG00000272398
GO:0043436	oxoacid metabolic process	41	1203	0.00846074691627393	0.0849145743139652	ENSG00000005421;ENSG00000038427;ENSG00000067057;ENSG00000067225;ENSG00000074800;ENSG00000083807;ENSG00000085662;ENSG00000103222;ENSG00000104951;ENSG00000106258;ENSG00000110195;ENSG00000111674;ENSG00000111716;ENSG00000117394;ENSG00000122176;ENSG00000123243;ENSG00000129521;ENSG00000130649;ENSG00000132965;ENSG00000140505;ENSG00000141526;ENSG00000143320;ENSG00000148344;ENSG00000149925;ENSG00000156966…
GO:2000145	regulation of cell motility	34	954	0.00851206663238868	0.085274870429546	ENSG00000005884;ENSG00000034510;ENSG00000049130;ENSG00000058085;ENSG00000070087;ENSG00000075218;ENSG00000077782;ENSG00000077942;ENSG00000091136;ENSG00000095970;ENSG00000100985;ENSG00000102359;ENSG00000105894;ENSG00000117525;ENSG00000122861;ENSG00000133110;ENSG00000137573;ENSG00000137673;ENSG00000139146;ENSG00000140274;ENSG00000146070;ENSG00000151882;ENSG00000153071;ENSG00000153233;ENSG00000157227…
GO:0040012	regulation of locomotion	36	1027	0.00880962678084018	0.0880962678084018	ENSG00000005884;ENSG00000034510;ENSG00000049130;ENSG00000058085;ENSG00000070087;ENSG00000075218;ENSG00000077782;ENSG00000077942;ENSG00000091136;ENSG00000095970;ENSG00000100985;ENSG00000102359;ENSG00000105894;ENSG00000117525;ENSG00000122861;ENSG00000133110;ENSG00000137285;ENSG00000137573;ENSG00000137673;ENSG00000139146;ENSG00000140274;ENSG00000146070;ENSG00000151882;ENSG00000153071;ENSG00000153233…
GO:0048678	response to axon injury	6	77	0.00886221684909143	0.0884622006777538	ENSG00000041982;ENSG00000105894;ENSG00000110195;ENSG00000118785;ENSG00000130427;ENSG00000170312
GO:0015718	monocarboxylic acid transport	10	179	0.0090156342691661	0.0898314549702496	ENSG00000083807;ENSG00000117394;ENSG00000131389;ENSG00000141526;ENSG00000148344;ENSG00000151365;ENSG00000163053;ENSG00000164687;ENSG00000197696;ENSG00000214253
GO:0014823	response to activity	6	78	0.00941855649625863	0.0935788468530745	ENSG00000051523;ENSG00000105894;ENSG00000133110;ENSG00000164171;ENSG00000170312;ENSG00000214253
GO:0007062	sister chromatid cohesion	5	56	0.00944249485425237	0.0935788468530745	ENSG00000117399;ENSG00000146670;ENSG00000156970;ENSG00000166851;ENSG00000169679
GO:0034508	centromere complex assembly	5	56	0.00944249485425237	0.0935788468530745	ENSG00000100162;ENSG00000115163;ENSG00000117724;ENSG00000123485;ENSG00000126787
GO:2000116	regulation of cysteine-type endopeptidase activity	12	237	0.00946940385196249	0.0936166682384849	ENSG00000011422;ENSG00000089685;ENSG00000100985;ENSG00000109846;ENSG00000117525;ENSG00000129521;ENSG00000143546;ENSG00000147889;ENSG00000163220;ENSG00000175793;ENSG00000214253;ENSG00000221867
GO:1903844	regulation of cellular response to transforming growth factor beta stimulus	8	127	0.00949709780864195	0.0936166682384849	ENSG00000005884;ENSG00000110195;ENSG00000113083;ENSG00000124225;ENSG00000153071;ENSG00000168743;ENSG00000170801;ENSG00000171310
GO:1904375	regulation of protein localization to cell periphery	8	127	0.00949709780864195	0.0936166682384849	ENSG00000005884;ENSG00000076716;ENSG00000095970;ENSG00000099812;ENSG00000106541;ENSG00000153071;ENSG00000157227;ENSG00000166851
GO:0007369	gastrulation	10	181	0.00970553224021174	0.0955010556732579	ENSG00000005884;ENSG00000054598;ENSG00000087245;ENSG00000091136;ENSG00000100985;ENSG00000107984;ENSG00000132470;ENSG00000155760;ENSG00000157227;ENSG00000164171
GO:0006090	pyruvate metabolic process	9	154	0.0097954451059703	0.0962145851439001	ENSG00000067057;ENSG00000067225;ENSG00000074800;ENSG00000111674;ENSG00000111716;ENSG00000141526;ENSG00000149925;ENSG00000159399;ENSG00000170525
GO:0031667	response to nutrient levels	22	552	0.00986331982574807	0.0967095011283454	ENSG00000005421;ENSG00000041982;ENSG00000051523;ENSG00000080293;ENSG00000105894;ENSG00000110195;ENSG00000113739;ENSG00000117394;ENSG00000118785;ENSG00000130427;ENSG00000133110;ENSG00000136943;ENSG00000137673;ENSG00000151882;ENSG00000160211;ENSG00000164171;ENSG00000164761;ENSG00000165168;ENSG00000181019;ENSG00000204583;ENSG00000214253;ENSG00000215644
GO:0043154	negative regulation of cysteine-type endopeptidase activity involved in apoptotic process	6	79	0.00999937293941357	0.0972110184501845	ENSG00000011422;ENSG00000089685;ENSG00000100985;ENSG00000109846;ENSG00000175793;ENSG00000221867
GO:0015908	fatty acid transport	7	103	0.0100495984356414	0.0972110184501845	ENSG00000083807;ENSG00000117394;ENSG00000148344;ENSG00000151365;ENSG00000164687;ENSG00000197696;ENSG00000214253
GO:0007399	nervous system development	74	2458	0.010062537029385	0.0972110184501845	ENSG00000005884;ENSG00000006611;ENSG00000007062;ENSG00000013810;ENSG00000038427;ENSG00000041982;ENSG00000054598;ENSG00000058085;ENSG00000069011;ENSG00000076716;ENSG00000076864;ENSG00000077782;ENSG00000079462;ENSG00000080293;ENSG00000091129;ENSG00000091136;ENSG00000092445;ENSG00000095970;ENSG00000102359;ENSG00000104419;ENSG00000104435;ENSG00000105894;ENSG00000107984;ENSG00000109861;ENSG00000110195…
GO:0022900	electron transport chain	10	182	0.0100652428561244	0.0972110184501845	ENSG00000051523;ENSG00000085662;ENSG00000116701;ENSG00000134057;ENSG00000139547;ENSG00000140505;ENSG00000165168;ENSG00000166920;ENSG00000170312;ENSG00000185633
GO:0006636	unsaturated fatty acid biosynthetic process	5	57	0.0101587202983026	0.0972110184501845	ENSG00000132965;ENSG00000148344;ENSG00000164181;ENSG00000164687;ENSG00000179593
GO:0043030	regulation of macrophage activation	5	57	0.0101587202983026	0.0972110184501845	ENSG00000095970;ENSG00000109861;ENSG00000135077;ENSG00000155659;ENSG00000176170
GO:0045981	positive regulation of nucleotide metabolic process	5	57	0.0101587202983026	0.0972110184501845	ENSG00000074800;ENSG00000095970;ENSG00000134057;ENSG00000170312;ENSG00000170525
GO:0051653	spindle localization	5	57	0.0101587202983026	0.0972110184501845	ENSG00000080986;ENSG00000099812;ENSG00000115163;ENSG00000164109;ENSG00000166851
GO:1900544	positive regulation of purine nucleotide metabolic process	5	57	0.0101587202983026	0.0972110184501845	ENSG00000074800;ENSG00000095970;ENSG00000134057;ENSG00000170312;ENSG00000170525
GO:2000242	negative regulation of reproductive process	5	57	0.0101587202983026	0.0972110184501845	ENSG00000071539;ENSG00000112742;ENSG00000122133;ENSG00000128342;ENSG00000137573
GO:0005975	carbohydrate metabolic process	25	654	0.0101677991924212	0.0972110184501845	ENSG00000067057;ENSG00000067225;ENSG00000074800;ENSG00000085662;ENSG00000111674;ENSG00000111713;ENSG00000111716;ENSG00000117394;ENSG00000133063;ENSG00000136840;ENSG00000140297;ENSG00000140835;ENSG00000149925;ENSG00000156966;ENSG00000159399;ENSG00000160182;ENSG00000160211;ENSG00000163931;ENSG00000164687;ENSG00000166391;ENSG00000170525;ENSG00000171310;ENSG00000175040;ENSG00000215644;ENSG00000237172
GO:0001953	negative regulation of cell-matrix adhesion	4	37	0.0102487785968356	0.0972110184501845	ENSG00000133110;ENSG00000147889;ENSG00000157227;ENSG00000262406
GO:0006882	cellular zinc ion homeostasis	4	37	0.0102487785968356	0.0972110184501845	ENSG00000143546;ENSG00000163220;ENSG00000169715;ENSG00000187193
GO:0040020	regulation of meiotic nuclear division	4	37	0.0102487785968356	0.0972110184501845	ENSG00000071539;ENSG00000112742;ENSG00000117399;ENSG00000128342
GO:0006979	response to oxidative stress	19	456	0.0102893103115695	0.0972110184501845	ENSG00000051523;ENSG00000085491;ENSG00000087245;ENSG00000100985;ENSG00000109846;ENSG00000114346;ENSG00000116701;ENSG00000130649;ENSG00000145386;ENSG00000157227;ENSG00000160211;ENSG00000164294;ENSG00000165168;ENSG00000165304;ENSG00000170312;ENSG00000176170;ENSG00000181019;ENSG00000183010;ENSG00000244405
GO:0060284	regulation of cell development	34	967	0.0103162813472949	0.0972110184501845	ENSG00000005884;ENSG00000076864;ENSG00000077782;ENSG00000077942;ENSG00000087494;ENSG00000091129;ENSG00000092929;ENSG00000095970;ENSG00000102837;ENSG00000104435;ENSG00000105894;ENSG00000107984;ENSG00000112655;ENSG00000113758;ENSG00000114346;ENSG00000116741;ENSG00000117399;ENSG00000118785;ENSG00000122133;ENSG00000123095;ENSG00000128342;ENSG00000130427;ENSG00000133110;ENSG00000137285;ENSG00000143320…
GO:0036294	cellular response to decreased oxygen levels	11	211	0.0103623878880945	0.0972110184501845	ENSG00000074800;ENSG00000104419;ENSG00000105894;ENSG00000107159;ENSG00000113739;ENSG00000129521;ENSG00000130427;ENSG00000134057;ENSG00000135245;ENSG00000145386;ENSG00000165168
GO:0016202	regulation of striated muscle tissue development	8	129	0.0103819105072323	0.0972110184501845	ENSG00000107984;ENSG00000113083;ENSG00000116741;ENSG00000117724;ENSG00000134057;ENSG00000155760;ENSG00000160211;ENSG00000170312
GO:0001866	NK T cell proliferation	2	7	0.0104066768395134	0.0972110184501845	ENSG00000102034;ENSG00000150782
GO:0030046	parallel actin filament bundle assembly	2	7	0.0104066768395134	0.0972110184501845	ENSG00000006611;ENSG00000075618
GO:0032808	lacrimal gland development	2	7	0.0104066768395134	0.0972110184501845	ENSG00000054598;ENSG00000143061
GO:0036018	cellular response to erythropoietin	2	7	0.0104066768395134	0.0972110184501845	ENSG00000130427;ENSG00000187193
GO:0090232	positive regulation of spindle checkpoint	2	7	0.0104066768395134	0.0972110184501845	ENSG00000080986;ENSG00000164109
GO:0090267	positive regulation of mitotic cell cycle spindle assembly checkpoint	2	7	0.0104066768395134	0.0972110184501845	ENSG00000080986;ENSG00000164109
GO:1900028	negative regulation of ruffle assembly	2	7	0.0104066768395134	0.0972110184501845	ENSG00000070087;ENSG00000184292
GO:1904044	response to aldosterone	2	7	0.0104066768395134	0.0972110184501845	ENSG00000051523;ENSG00000165168
GO:1905448	positive regulation of mitochondrial ATP synthesis coupled electron transport	2	7	0.0104066768395134	0.0972110184501845	ENSG00000134057;ENSG00000170312
GO:2001301	lipoxin biosynthetic process	2	7	0.0104066768395134	0.0972110184501845	ENSG00000132965;ENSG00000179593
GO:0002523	leukocyte migration involved in inflammatory response	3	20	0.0104948348716163	0.0973765718792582	ENSG00000105894;ENSG00000143546;ENSG00000163220
GO:0006670	sphingosine metabolic process	3	20	0.0104948348716163	0.0973765718792582	ENSG00000141934;ENSG00000163082;ENSG00000176170
GO:0061318	renal filtration cell differentiation	3	20	0.0104948348716163	0.0973765718792582	ENSG00000007062;ENSG00000157483;ENSG00000272398
GO:0072112	glomerular visceral epithelial cell differentiation	3	20	0.0104948348716163	0.0973765718792582	ENSG00000007062;ENSG00000157483;ENSG00000272398
GO:0042592	homeostatic process	60	1926	0.0105228068262634	0.0974725657441145	ENSG00000005059;ENSG00000006611;ENSG00000007062;ENSG00000049130;ENSG00000051180;ENSG00000051523;ENSG00000054598;ENSG00000069849;ENSG00000074410;ENSG00000080293;ENSG00000085662;ENSG00000089685;ENSG00000092068;ENSG00000092445;ENSG00000095970;ENSG00000096433;ENSG00000105173;ENSG00000113083;ENSG00000113739;ENSG00000116701;ENSG00000117122;ENSG00000117394;ENSG00000117650;ENSG00000118785;ENSG00000124766…
GO:0010941	regulation of cell death	54	1700	0.0105516449177061	0.0975762481520314	ENSG00000011422;ENSG00000049130;ENSG00000054598;ENSG00000074800;ENSG00000077782;ENSG00000085491;ENSG00000085662;ENSG00000089685;ENSG00000092445;ENSG00000095970;ENSG00000100604;ENSG00000100985;ENSG00000101057;ENSG00000104419;ENSG00000105894;ENSG00000106541;ENSG00000107984;ENSG00000109846;ENSG00000109861;ENSG00000113083;ENSG00000114346;ENSG00000117525;ENSG00000124664;ENSG00000124766;ENSG00000129521…
GO:0055002	striated muscle cell development	9	156	0.0106044014351191	0.0979004005612835	ENSG00000113083;ENSG00000116741;ENSG00000128591;ENSG00000134057;ENSG00000154277;ENSG00000160211;ENSG00000170312;ENSG00000171345;ENSG00000187957
GO:0001894	tissue homeostasis	12	241	0.0107206050192448	0.0988082429273727	ENSG00000006611;ENSG00000007062;ENSG00000054598;ENSG00000085662;ENSG00000117394;ENSG00000118785;ENSG00000153395;ENSG00000160181;ENSG00000160182;ENSG00000164761;ENSG00000167972;ENSG00000171199
GO:0051270	regulation of cellular component movement	36	1041	0.0107422997301804	0.0988434567519092	ENSG00000005884;ENSG00000034510;ENSG00000046604;ENSG00000049130;ENSG00000058085;ENSG00000070087;ENSG00000075218;ENSG00000077782;ENSG00000077942;ENSG00000091136;ENSG00000095970;ENSG00000100985;ENSG00000102359;ENSG00000105894;ENSG00000117525;ENSG00000122861;ENSG00000133110;ENSG00000137285;ENSG00000137573;ENSG00000137673;ENSG00000139146;ENSG00000140274;ENSG00000146070;ENSG00000151882;ENSG00000153071…
GO:0051246	regulation of protein metabolic process	85	2896	0.0108950442362482	0.0998999804102014	ENSG00000005001;ENSG00000005448;ENSG00000011422;ENSG00000046774;ENSG00000049130;ENSG00000051180;ENSG00000067225;ENSG00000070087;ENSG00000074800;ENSG00000077782;ENSG00000077942;ENSG00000088325;ENSG00000088992;ENSG00000089685;ENSG00000094804;ENSG00000095970;ENSG00000100985;ENSG00000101443;ENSG00000104341;ENSG00000105173;ENSG00000105894;ENSG00000107984;ENSG00000109846;ENSG00000109861;ENSG00000111206…
GO:0016266	O-glycan processing	5	58	0.0109113179326875	0.0998999804102014	ENSG00000136840;ENSG00000140297;ENSG00000140835;ENSG00000156966;ENSG00000185499
GO:1900024	regulation of substrate adhesion-dependent cell spreading	5	58	0.0109113179326875	0.0998999804102014	ENSG00000077942;ENSG00000092929;ENSG00000102837;ENSG00000133110;ENSG00000184292
GO:0006082	organic acid metabolic process	41	1223	0.010991145998428	0.100464524580673	ENSG00000005421;ENSG00000038427;ENSG00000067057;ENSG00000067225;ENSG00000074800;ENSG00000083807;ENSG00000085662;ENSG00000103222;ENSG00000104951;ENSG00000106258;ENSG00000110195;ENSG00000111674;ENSG00000111716;ENSG00000117394;ENSG00000122176;ENSG00000123243;ENSG00000129521;ENSG00000130649;ENSG00000132965;ENSG00000140505;ENSG00000141526;ENSG00000143320;ENSG00000148344;ENSG00000149925;ENSG00000156966…
GO:0042326	negative regulation of phosphorylation	19	460	0.0112112173863229	0.102306983739877	ENSG00000077942;ENSG00000088992;ENSG00000107984;ENSG00000111206;ENSG00000116741;ENSG00000124225;ENSG00000126259;ENSG00000128342;ENSG00000130829;ENSG00000134057;ENSG00000135549;ENSG00000147889;ENSG00000153233;ENSG00000154277;ENSG00000166851;ENSG00000168078;ENSG00000172425;ENSG00000175793;ENSG00000186818
GO:0016572	histone phosphorylation	4	38	0.0112497242060766	0.102320682334874	ENSG00000134057;ENSG00000145386;ENSG00000170312;ENSG00000178999
GO:0042554	superoxide anion generation	4	38	0.0112497242060766	0.102320682334874	ENSG00000051523;ENSG00000116701;ENSG00000165168;ENSG00000169896
GO:1901861	regulation of muscle tissue development	8	131	0.0113264186556673	0.102849088942267	ENSG00000107984;ENSG00000113083;ENSG00000116741;ENSG00000117724;ENSG00000134057;ENSG00000155760;ENSG00000160211;ENSG00000170312
GO:0060326	cell chemotaxis	14	303	0.011398811168707	0.103336763545819	ENSG00000077782;ENSG00000100604;ENSG00000103222;ENSG00000105894;ENSG00000113083;ENSG00000143546;ENSG00000146070;ENSG00000151882;ENSG00000158747;ENSG00000158869;ENSG00000163220;ENSG00000163735;ENSG00000163739;ENSG00000169429
GO:0043009	chordate embryonic development	24	627	0.0114871714134879	0.103967361565611	ENSG00000054598;ENSG00000077782;ENSG00000101003;ENSG00000110195;ENSG00000112559;ENSG00000112655;ENSG00000113758;ENSG00000117650;ENSG00000124766;ENSG00000128342;ENSG00000134057;ENSG00000137573;ENSG00000141756;ENSG00000153233;ENSG00000157227;ENSG00000157456;ENSG00000157483;ENSG00000157765;ENSG00000161714;ENSG00000164932;ENSG00000171310;ENSG00000171345;ENSG00000206557;ENSG00000260027
GO:1905330	regulation of morphogenesis of an epithelium	10	186	0.0116065414112907	0.104705906238693	ENSG00000076716;ENSG00000107984;ENSG00000112655;ENSG00000128342;ENSG00000137573;ENSG00000153071;ENSG00000155760;ENSG00000164932;ENSG00000184292;ENSG00000260027
GO:0023051	regulation of signaling	103	3618	0.011606640239479	0.104705906238693	ENSG00000005448;ENSG00000005884;ENSG00000011422;ENSG00000035499;ENSG00000049130;ENSG00000051523;ENSG00000069849;ENSG00000070087;ENSG00000074800;ENSG00000075461;ENSG00000076716;ENSG00000076864;ENSG00000077782;ENSG00000077942;ENSG00000080293;ENSG00000085662;ENSG00000088325;ENSG00000089356;ENSG00000089685;ENSG00000090104;ENSG00000092445;ENSG00000095970;ENSG00000096433;ENSG00000100604;ENSG00000100985…
GO:0044057	regulation of system process	23	594	0.0116327278100877	0.104770333533852	ENSG00000046604;ENSG00000051523;ENSG00000053918;ENSG00000069849;ENSG00000074800;ENSG00000075461;ENSG00000089356;ENSG00000096433;ENSG00000100604;ENSG00000106236;ENSG00000109861;ENSG00000116741;ENSG00000137731;ENSG00000145708;ENSG00000160181;ENSG00000160211;ENSG00000164171;ENSG00000164687;ENSG00000168743;ENSG00000171199;ENSG00000175084;ENSG00000175344;ENSG00000176170
GO:1901701	cellular response to oxygen-containing compound	39	1155	0.0116591404034389	0.104837473871573	ENSG00000041982;ENSG00000051180;ENSG00000051523;ENSG00000053918;ENSG00000067225;ENSG00000085662;ENSG00000087245;ENSG00000088992;ENSG00000089685;ENSG00000094804;ENSG00000095970;ENSG00000100985;ENSG00000103222;ENSG00000105894;ENSG00000110195;ENSG00000112655;ENSG00000114346;ENSG00000118785;ENSG00000124766;ENSG00000134057;ENSG00000135077;ENSG00000145386;ENSG00000145708;ENSG00000150551;ENSG00000150782…
GO:0006733	oxidoreduction coenzyme metabolic process	11	215	0.0118081956830086	0.106005393063372	ENSG00000067057;ENSG00000067225;ENSG00000074800;ENSG00000111674;ENSG00000149925;ENSG00000159399;ENSG00000160211;ENSG00000163931;ENSG00000170525;ENSG00000181019;ENSG00000204653
GO:0048598	embryonic morphogenesis	23	595	0.0118488746088937	0.106198179233682	ENSG00000005884;ENSG00000006611;ENSG00000054598;ENSG00000069011;ENSG00000087245;ENSG00000091136;ENSG00000100985;ENSG00000107984;ENSG00000110195;ENSG00000112559;ENSG00000112655;ENSG00000117122;ENSG00000124766;ENSG00000132470;ENSG00000137573;ENSG00000143320;ENSG00000155760;ENSG00000157227;ENSG00000164171;ENSG00000164932;ENSG00000171310;ENSG00000206557;ENSG00000260027
GO:0017000	antibiotic biosynthetic process	3	21	0.0120369535608678	0.107188974543638	ENSG00000051523;ENSG00000140274;ENSG00000140505
GO:0060219	camera-type eye photoreceptor cell differentiation	3	21	0.0120369535608678	0.107188974543638	ENSG00000006611;ENSG00000007062;ENSG00000105894
GO:1902001	fatty acid transmembrane transport	3	21	0.0120369535608678	0.107188974543638	ENSG00000083807;ENSG00000117394;ENSG00000151365
GO:1902307	positive regulation of sodium ion transmembrane transport	3	21	0.0120369535608678	0.107188974543638	ENSG00000069849;ENSG00000088992;ENSG00000137731
GO:2000134	negative regulation of G1/S transition of mitotic cell cycle	7	107	0.0122354479032157	0.108781393737593	ENSG00000075218;ENSG00000124766;ENSG00000134057;ENSG00000147889;ENSG00000170312;ENSG00000175793;ENSG00000185499
GO:0055069	zinc ion homeostasis	4	39	0.0123114833082653	0.10912132702036	ENSG00000143546;ENSG00000163220;ENSG00000169715;ENSG00000187193
GO:0048634	regulation of muscle organ development	8	133	0.0123328805402758	0.10912132702036	ENSG00000107984;ENSG00000113083;ENSG00000116741;ENSG00000117724;ENSG00000134057;ENSG00000155760;ENSG00000160211;ENSG00000170312
GO:0061982	meiosis I cell cycle process	8	133	0.0123328805402758	0.10912132702036	ENSG00000051180;ENSG00000071539;ENSG00000105173;ENSG00000131747;ENSG00000157456;ENSG00000164045;ENSG00000164611;ENSG00000166851
GO:0097237	cellular response to toxic substance	12	246	0.0124600893796962	0.110000035971162	ENSG00000051180;ENSG00000114346;ENSG00000132965;ENSG00000148344;ENSG00000163220;ENSG00000164294;ENSG00000165168;ENSG00000170312;ENSG00000176170;ENSG00000181019;ENSG00000183010;ENSG00000214253
GO:0051338	regulation of transferase activity	35	1016	0.0124719751453741	0.110000035971162	ENSG00000046774;ENSG00000049130;ENSG00000077782;ENSG00000088325;ENSG00000088992;ENSG00000092445;ENSG00000094804;ENSG00000105173;ENSG00000107984;ENSG00000114346;ENSG00000116741;ENSG00000117399;ENSG00000117650;ENSG00000130427;ENSG00000130829;ENSG00000134057;ENSG00000135549;ENSG00000143125;ENSG00000145386;ENSG00000147852;ENSG00000147889;ENSG00000150782;ENSG00000154277;ENSG00000157456;ENSG00000164045…
GO:0001932	regulation of protein phosphorylation	47	1454	0.0124977673800799	0.1100519961972	ENSG00000005448;ENSG00000011422;ENSG00000049130;ENSG00000051180;ENSG00000070087;ENSG00000077782;ENSG00000077942;ENSG00000088325;ENSG00000088992;ENSG00000094804;ENSG00000095970;ENSG00000100985;ENSG00000105173;ENSG00000107984;ENSG00000111206;ENSG00000112742;ENSG00000113083;ENSG00000114346;ENSG00000116741;ENSG00000124225;ENSG00000126259;ENSG00000128342;ENSG00000130427;ENSG00000130829;ENSG00000134057…
GO:0051148	negative regulation of muscle cell differentiation	5	60	0.0125288822493924	0.11015058638973	ENSG00000107984;ENSG00000116741;ENSG00000123095;ENSG00000155760;ENSG00000160211
GO:0001503	ossification	17	401	0.0126203227391705	0.110778388488274	ENSG00000011028;ENSG00000038427;ENSG00000041982;ENSG00000054598;ENSG00000087245;ENSG00000087494;ENSG00000100985;ENSG00000105472;ENSG00000105894;ENSG00000107984;ENSG00000113083;ENSG00000118785;ENSG00000157227;ENSG00000157613;ENSG00000164932;ENSG00000168743;ENSG00000178882
GO:0006915	apoptotic process	60	1945	0.012762914763889	0.11185248596562	ENSG00000011422;ENSG00000049130;ENSG00000054598;ENSG00000074800;ENSG00000077782;ENSG00000085662;ENSG00000088325;ENSG00000089685;ENSG00000092445;ENSG00000095970;ENSG00000100985;ENSG00000101057;ENSG00000104419;ENSG00000105894;ENSG00000107984;ENSG00000109846;ENSG00000109861;ENSG00000113083;ENSG00000114346;ENSG00000117525;ENSG00000120057;ENSG00000122133;ENSG00000124664;ENSG00000124766;ENSG00000129521…
GO:1902107	positive regulation of leukocyte differentiation	9	161	0.0128458420230177	0.112401117701405	ENSG00000049130;ENSG00000088992;ENSG00000095970;ENSG00000104951;ENSG00000124766;ENSG00000128342;ENSG00000150782;ENSG00000157227;ENSG00000186818
GO:1903827	regulation of cellular protein localization	22	567	0.0131352429911569	0.114751806857974	ENSG00000005884;ENSG00000075218;ENSG00000076716;ENSG00000080986;ENSG00000095970;ENSG00000099812;ENSG00000105173;ENSG00000105894;ENSG00000106541;ENSG00000114346;ENSG00000128342;ENSG00000146670;ENSG00000147889;ENSG00000153071;ENSG00000157227;ENSG00000166851;ENSG00000167513;ENSG00000169896;ENSG00000170312;ENSG00000175793;ENSG00000186818;ENSG00000214253
GO:0032504	multicellular organism reproduction	31	878	0.0132490773022133	0.115563718424668	ENSG00000005884;ENSG00000054598;ENSG00000071539;ENSG00000079462;ENSG00000085662;ENSG00000092445;ENSG00000101443;ENSG00000105894;ENSG00000110195;ENSG00000112742;ENSG00000113739;ENSG00000116741;ENSG00000118785;ENSG00000122133;ENSG00000128242;ENSG00000128342;ENSG00000129654;ENSG00000131747;ENSG00000134057;ENSG00000135077;ENSG00000136943;ENSG00000137673;ENSG00000137819;ENSG00000154040;ENSG00000157456…
GO:0051716	cellular response to stimulus	200	7661	0.0134183336565002	0.116038203347672	ENSG00000005448;ENSG00000005884;ENSG00000011422;ENSG00000019505;ENSG00000021300;ENSG00000035499;ENSG00000041982;ENSG00000049130;ENSG00000051180;ENSG00000051523;ENSG00000053918;ENSG00000054179;ENSG00000054598;ENSG00000067057;ENSG00000067225;ENSG00000071539;ENSG00000074800;ENSG00000075218;ENSG00000075461;ENSG00000075618;ENSG00000076716;ENSG00000076864;ENSG00000077782;ENSG00000077942;ENSG00000080293…
GO:0008210	estrogen metabolic process	4	40	0.0134352793123568	0.116038203347672	ENSG00000106258;ENSG00000140505;ENSG00000160868;ENSG00000227471
GO:0014002	astrocyte development	4	40	0.0134352793123568	0.116038203347672	ENSG00000095970;ENSG00000143546;ENSG00000163220;ENSG00000182240
GO:0030866	cortical actin cytoskeleton organization	4	40	0.0134352793123568	0.116038203347672	ENSG00000011426;ENSG00000114346;ENSG00000157827;ENSG00000161800
GO:0002694	regulation of leukocyte activation	23	602	0.013453948163703	0.116038203347672	ENSG00000092445;ENSG00000092929;ENSG00000095970;ENSG00000104951;ENSG00000106123;ENSG00000109861;ENSG00000124766;ENSG00000129654;ENSG00000130427;ENSG00000135077;ENSG00000139514;ENSG00000147889;ENSG00000150782;ENSG00000155659;ENSG00000157227;ENSG00000169896;ENSG00000176170;ENSG00000186818;ENSG00000204252;ENSG00000211935;ENSG00000211950;ENSG00000232216;ENSG00000272398
GO:0035690	cellular response to drug	16	372	0.013470594942068	0.116038203347672	ENSG00000051180;ENSG00000051523;ENSG00000053918;ENSG00000110195;ENSG00000114346;ENSG00000145386;ENSG00000145708;ENSG00000150551;ENSG00000154277;ENSG00000165168;ENSG00000170312;ENSG00000175344;ENSG00000176170;ENSG00000181019;ENSG00000182195;ENSG00000183010
GO:0009698	phenylpropanoid metabolic process	2	8	0.0136643606614196	0.116038203347672	ENSG00000197838;ENSG00000198077
GO:0009804	coumarin metabolic process	2	8	0.0136643606614196	0.116038203347672	ENSG00000197838;ENSG00000198077
GO:0032119	sequestering of zinc ion	2	8	0.0136643606614196	0.116038203347672	ENSG00000143546;ENSG00000163220
GO:0033085	negative regulation of T cell differentiation in thymus	2	8	0.0136643606614196	0.116038203347672	ENSG00000129654;ENSG00000147889
GO:0033313	meiotic cell cycle checkpoint	2	8	0.0136643606614196	0.116038203347672	ENSG00000071539;ENSG00000112742
GO:0035360	positive regulation of peroxisome proliferator activated receptor signaling pathway	2	8	0.0136643606614196	0.116038203347672	ENSG00000164687;ENSG00000179593
GO:0036017	response to erythropoietin	2	8	0.0136643606614196	0.116038203347672	ENSG00000130427;ENSG00000187193
GO:0071314	cellular response to cocaine	2	8	0.0136643606614196	0.116038203347672	ENSG00000145386;ENSG00000145708
GO:1903980	positive regulation of microglial cell activation	2	8	0.0136643606614196	0.116038203347672	ENSG00000095970;ENSG00000109861
GO:2001300	lipoxin metabolic process	2	8	0.0136643606614196	0.116038203347672	ENSG00000132965;ENSG00000179593
GO:0035089	establishment of apical/basal cell polarity	3	22	0.0137021603591374	0.116038203347672	ENSG00000075618;ENSG00000112655;ENSG00000129654
GO:0046519	sphingoid metabolic process	3	22	0.0137021603591374	0.116038203347672	ENSG00000141934;ENSG00000163082;ENSG00000176170
GO:2000738	positive regulation of stem cell differentiation	3	22	0.0137021603591374	0.116038203347672	ENSG00000054598;ENSG00000105894;ENSG00000184292
GO:0048869	cellular developmental process	124	4491	0.0138182092783787	0.116842044815648	ENSG00000005884;ENSG00000006611;ENSG00000007062;ENSG00000011028;ENSG00000021300;ENSG00000038427;ENSG00000041982;ENSG00000046604;ENSG00000049130;ENSG00000054598;ENSG00000058085;ENSG00000069011;ENSG00000071539;ENSG00000076864;ENSG00000077782;ENSG00000077942;ENSG00000085662;ENSG00000087245;ENSG00000087494;ENSG00000088992;ENSG00000091129;ENSG00000091136;ENSG00000092445;ENSG00000092929;ENSG00000095970…
GO:0002252	immune effector process	43	1315	0.0138665600896288	0.117071873733813	ENSG00000011422;ENSG00000051523;ENSG00000067225;ENSG00000092929;ENSG00000095970;ENSG00000096088;ENSG00000100604;ENSG00000100985;ENSG00000102837;ENSG00000104951;ENSG00000106123;ENSG00000106348;ENSG00000109861;ENSG00000122861;ENSG00000129654;ENSG00000133063;ENSG00000135077;ENSG00000141524;ENSG00000143226;ENSG00000143546;ENSG00000145920;ENSG00000149925;ENSG00000150782;ENSG00000153395;ENSG00000155659…
GO:0050790	regulation of catalytic activity	73	2455	0.0139245126750507	0.117360046308474	ENSG00000005001;ENSG00000011422;ENSG00000035499;ENSG00000046774;ENSG00000049130;ENSG00000051523;ENSG00000069849;ENSG00000070087;ENSG00000076864;ENSG00000077782;ENSG00000077942;ENSG00000088325;ENSG00000088992;ENSG00000089685;ENSG00000090104;ENSG00000092445;ENSG00000094804;ENSG00000100985;ENSG00000101443;ENSG00000105173;ENSG00000105894;ENSG00000107984;ENSG00000109846;ENSG00000114346;ENSG00000116741…
GO:0048514	blood vessel morphogenesis	23	604	0.0139431375089814	0.117360046308474	ENSG00000054598;ENSG00000067225;ENSG00000087245;ENSG00000091129;ENSG00000102359;ENSG00000105894;ENSG00000110195;ENSG00000113083;ENSG00000117525;ENSG00000124766;ENSG00000137573;ENSG00000141756;ENSG00000143125;ENSG00000150782;ENSG00000157227;ENSG00000157483;ENSG00000157613;ENSG00000159399;ENSG00000161714;ENSG00000165168;ENSG00000169429;ENSG00000175344;ENSG00000176170
GO:0050672	negative regulation of lymphocyte proliferation	6	85	0.0140286468201928	0.117900329659068	ENSG00000104951;ENSG00000129654;ENSG00000135077;ENSG00000147889;ENSG00000155659;ENSG00000186818
GO:1902807	negative regulation of cell cycle G1/S phase transition	7	110	0.0140859609232676	0.118202373149727	ENSG00000075218;ENSG00000124766;ENSG00000134057;ENSG00000147889;ENSG00000170312;ENSG00000175793;ENSG00000185499
GO:0016051	carbohydrate biosynthetic process	11	221	0.0142593315181873	0.119467034330177	ENSG00000074800;ENSG00000085662;ENSG00000111674;ENSG00000111713;ENSG00000117394;ENSG00000149925;ENSG00000156966;ENSG00000160211;ENSG00000163931;ENSG00000171310;ENSG00000237172
GO:0043388	positive regulation of DNA binding	5	62	0.014301478612401	0.119467034330177	ENSG00000011422;ENSG00000054598;ENSG00000100985;ENSG00000146670;ENSG00000164171
GO:1902475	L-alpha-amino acid transmembrane transport	5	62	0.014301478612401	0.119467034330177	ENSG00000092068;ENSG00000105281;ENSG00000111371;ENSG00000116741;ENSG00000139514
GO:0046006	regulation of activated T cell proliferation	4	41	0.0146222624736636	0.121778782348433	ENSG00000130427;ENSG00000150782;ENSG00000186818;ENSG00000272398
GO:0090184	positive regulation of kidney development	4	41	0.0146222624736636	0.121778782348433	ENSG00000007062;ENSG00000128342;ENSG00000260027;ENSG00000272398
GO:0032945	negative regulation of mononuclear cell proliferation	6	86	0.0147958246873532	0.123038963189569	ENSG00000104951;ENSG00000129654;ENSG00000135077;ENSG00000147889;ENSG00000155659;ENSG00000186818
GO:0050865	regulation of cell activation	24	643	0.0151911684408027	0.126136879095554	ENSG00000092445;ENSG00000092929;ENSG00000095970;ENSG00000104951;ENSG00000106123;ENSG00000109861;ENSG00000124766;ENSG00000129654;ENSG00000130427;ENSG00000135077;ENSG00000139514;ENSG00000147889;ENSG00000150782;ENSG00000155659;ENSG00000157227;ENSG00000158869;ENSG00000169896;ENSG00000176170;ENSG00000186818;ENSG00000204252;ENSG00000211935;ENSG00000211950;ENSG00000232216;ENSG00000272398
GO:2000272	negative regulation of signaling receptor activity	5	63	0.0152477816511661	0.126417140226309	ENSG00000107984;ENSG00000145708;ENSG00000150551;ENSG00000186818;ENSG00000269028
GO:0060487	lung epithelial cell differentiation	3	23	0.0154917150021194	0.128055581407654	ENSG00000106541;ENSG00000124664;ENSG00000129654
GO:0062033	positive regulation of mitotic sister chromatid segregation	3	23	0.0154917150021194	0.128055581407654	ENSG00000126787;ENSG00000167513;ENSG00000178999
GO:0060419	heart growth	6	87	0.0155916761703978	0.128306501818898	ENSG00000054598;ENSG00000116741;ENSG00000130829;ENSG00000134057;ENSG00000160211;ENSG00000170312
GO:0070098	chemokine-mediated signaling pathway	6	87	0.0155916761703978	0.128306501818898	ENSG00000054598;ENSG00000095970;ENSG00000160181;ENSG00000163735;ENSG00000163739;ENSG00000169429
GO:2000117	negative regulation of cysteine-type endopeptidase activity	6	87	0.0155916761703978	0.128306501818898	ENSG00000011422;ENSG00000089685;ENSG00000100985;ENSG00000109846;ENSG00000175793;ENSG00000221867
GO:0071900	regulation of protein serine/threonine kinase activity	20	510	0.0158242096443073	0.130026566616671	ENSG00000049130;ENSG00000077782;ENSG00000094804;ENSG00000105173;ENSG00000107984;ENSG00000116741;ENSG00000130829;ENSG00000134057;ENSG00000135549;ENSG00000143125;ENSG00000145386;ENSG00000147889;ENSG00000154277;ENSG00000157456;ENSG00000164045;ENSG00000166851;ENSG00000168078;ENSG00000175344;ENSG00000175793;ENSG00000272398
GO:0006040	amino sugar metabolic process	4	42	0.0158735094703854	0.130045196105527	ENSG00000133063;ENSG00000140835;ENSG00000175040;ENSG00000197355
GO:0046688	response to copper ion	4	42	0.0158735094703854	0.130045196105527	ENSG00000140505;ENSG00000169715;ENSG00000170312;ENSG00000187193
GO:0050794	regulation of cellular process	278	11089	0.0160383150908142	0.131201009544679	ENSG00000005001;ENSG00000005448;ENSG00000005884;ENSG00000006611;ENSG00000007062;ENSG00000011422;ENSG00000011426;ENSG00000013810;ENSG00000019505;ENSG00000021300;ENSG00000034510;ENSG00000035499;ENSG00000041982;ENSG00000046604;ENSG00000046774;ENSG00000049130;ENSG00000050344;ENSG00000051180;ENSG00000051523;ENSG00000053918;ENSG00000054179;ENSG00000054598;ENSG00000058085;ENSG00000067225;ENSG00000068489…
GO:0009792	embryo development ending in birth or egg hatching	24	647	0.0162518124751097	0.132751141783392	ENSG00000054598;ENSG00000077782;ENSG00000101003;ENSG00000110195;ENSG00000112559;ENSG00000112655;ENSG00000113758;ENSG00000117650;ENSG00000124766;ENSG00000128342;ENSG00000134057;ENSG00000137573;ENSG00000141756;ENSG00000153233;ENSG00000157227;ENSG00000157456;ENSG00000157483;ENSG00000157765;ENSG00000161714;ENSG00000164932;ENSG00000171310;ENSG00000171345;ENSG00000206557;ENSG00000260027
GO:0030154	cell differentiation	119	4311	0.0162893080894965	0.132861170700465	ENSG00000005884;ENSG00000006611;ENSG00000007062;ENSG00000011028;ENSG00000021300;ENSG00000038427;ENSG00000041982;ENSG00000046604;ENSG00000049130;ENSG00000054598;ENSG00000058085;ENSG00000069011;ENSG00000071539;ENSG00000076864;ENSG00000077782;ENSG00000077942;ENSG00000085662;ENSG00000087245;ENSG00000087494;ENSG00000088992;ENSG00000091129;ENSG00000091136;ENSG00000092445;ENSG00000092929;ENSG00000095970…
GO:0009135	purine nucleoside diphosphate metabolic process	8	140	0.016375491658126	0.133171277749172	ENSG00000054179;ENSG00000067057;ENSG00000067225;ENSG00000074800;ENSG00000111674;ENSG00000149925;ENSG00000159399;ENSG00000170525
GO:0009179	purine ribonucleoside diphosphate metabolic process	8	140	0.016375491658126	0.133171277749172	ENSG00000054179;ENSG00000067057;ENSG00000067225;ENSG00000074800;ENSG00000111674;ENSG00000149925;ENSG00000159399;ENSG00000170525
GO:0034220	ion transmembrane transport	39	1182	0.0164126343609051	0.133277339230257	ENSG00000005059;ENSG00000051523;ENSG00000053918;ENSG00000069849;ENSG00000075461;ENSG00000083807;ENSG00000088992;ENSG00000089356;ENSG00000092068;ENSG00000095970;ENSG00000096433;ENSG00000100985;ENSG00000102007;ENSG00000103222;ENSG00000103534;ENSG00000104723;ENSG00000105281;ENSG00000110195;ENSG00000111371;ENSG00000116741;ENSG00000117394;ENSG00000130427;ENSG00000131389;ENSG00000137731;ENSG00000139514…
GO:0051962	positive regulation of nervous system development	21	546	0.0165729260082242	0.134271927312874	ENSG00000005884;ENSG00000077782;ENSG00000091129;ENSG00000095970;ENSG00000102359;ENSG00000104435;ENSG00000105894;ENSG00000112655;ENSG00000113758;ENSG00000114346;ENSG00000116741;ENSG00000117399;ENSG00000128342;ENSG00000130427;ENSG00000137285;ENSG00000143320;ENSG00000147852;ENSG00000158747;ENSG00000163220;ENSG00000187688;ENSG00000244405
GO:0048609	multicellular organismal reproductive process	30	858	0.0165836756518433	0.134271927312874	ENSG00000005884;ENSG00000054598;ENSG00000071539;ENSG00000079462;ENSG00000085662;ENSG00000092445;ENSG00000101443;ENSG00000105894;ENSG00000112742;ENSG00000113739;ENSG00000116741;ENSG00000118785;ENSG00000122133;ENSG00000128242;ENSG00000128342;ENSG00000129654;ENSG00000131747;ENSG00000134057;ENSG00000135077;ENSG00000136943;ENSG00000137673;ENSG00000137819;ENSG00000154040;ENSG00000157456;ENSG00000161800…
GO:0019752	carboxylic acid metabolic process	37	1110	0.0166283329807474	0.134436668689376	ENSG00000005421;ENSG00000038427;ENSG00000067057;ENSG00000067225;ENSG00000074800;ENSG00000083807;ENSG00000085662;ENSG00000103222;ENSG00000104951;ENSG00000106258;ENSG00000110195;ENSG00000111674;ENSG00000111716;ENSG00000117394;ENSG00000123243;ENSG00000129521;ENSG00000130649;ENSG00000132965;ENSG00000140505;ENSG00000141526;ENSG00000143320;ENSG00000148344;ENSG00000149925;ENSG00000159399;ENSG00000160868…
GO:0050769	positive regulation of neurogenesis	19	480	0.0168536217510813	0.134757279022858	ENSG00000005884;ENSG00000077782;ENSG00000091129;ENSG00000095970;ENSG00000104435;ENSG00000105894;ENSG00000112655;ENSG00000113758;ENSG00000114346;ENSG00000116741;ENSG00000128342;ENSG00000130427;ENSG00000137285;ENSG00000143320;ENSG00000147852;ENSG00000158747;ENSG00000163220;ENSG00000187688;ENSG00000244405
GO:0006023	aminoglycan biosynthetic process	7	114	0.0168536466297587	0.134757279022858	ENSG00000038427;ENSG00000076716;ENSG00000122176;ENSG00000156966;ENSG00000171310;ENSG00000175040;ENSG00000237172
GO:0010001	glial cell differentiation	11	227	0.0170765999025142	0.134757279022858	ENSG00000095970;ENSG00000104419;ENSG00000105894;ENSG00000124766;ENSG00000128342;ENSG00000132470;ENSG00000143546;ENSG00000163220;ENSG00000170312;ENSG00000182240;ENSG00000187957
GO:0033574	response to testosterone	4	43	0.0171900231739062	0.134757279022858	ENSG00000107159;ENSG00000118785;ENSG00000130427;ENSG00000181019
GO:0045454	cell redox homeostasis	4	43	0.0171900231739062	0.134757279022858	ENSG00000051523;ENSG00000116701;ENSG00000165168;ENSG00000181019
GO:0009991	response to extracellular stimulus	22	582	0.017221542259186	0.134757279022858	ENSG00000005421;ENSG00000041982;ENSG00000051523;ENSG00000080293;ENSG00000105894;ENSG00000110195;ENSG00000113739;ENSG00000117394;ENSG00000118785;ENSG00000130427;ENSG00000133110;ENSG00000136943;ENSG00000137673;ENSG00000151882;ENSG00000160211;ENSG00000164171;ENSG00000164761;ENSG00000165168;ENSG00000181019;ENSG00000204583;ENSG00000214253;ENSG00000215644
GO:0060420	regulation of heart growth	5	65	0.0172639251429639	0.134757279022858	ENSG00000116741;ENSG00000130829;ENSG00000134057;ENSG00000160211;ENSG00000170312
GO:0048661	positive regulation of smooth muscle cell proliferation	6	89	0.017271330683837	0.134757279022858	ENSG00000051523;ENSG00000085662;ENSG00000087245;ENSG00000100985;ENSG00000150782;ENSG00000164171
GO:0006868	glutamine transport	2	9	0.0173015674694809	0.134757279022858	ENSG00000105281;ENSG00000111371
GO:0007135	meiosis II	2	9	0.0173015674694809	0.134757279022858	ENSG00000156970;ENSG00000169679
GO:0007144	female meiosis I	2	9	0.0173015674694809	0.134757279022858	ENSG00000071539;ENSG00000157456
GO:0010692	regulation of alkaline phosphatase activity	2	9	0.0173015674694809	0.134757279022858	ENSG00000164171;ENSG00000168743
GO:0010911	regulation of isomerase activity	2	9	0.0173015674694809	0.134757279022858	ENSG00000121152;ENSG00000169896
GO:0010912	positive regulation of isomerase activity	2	9	0.0173015674694809	0.134757279022858	ENSG00000121152;ENSG00000169896
GO:0017185	peptidyl-lysine hydroxylation	2	9	0.0173015674694809	0.134757279022858	ENSG00000110811;ENSG00000141756
GO:0045144	meiotic sister chromatid segregation	2	9	0.0173015674694809	0.134757279022858	ENSG00000156970;ENSG00000169679
GO:0046602	regulation of mitotic centrosome separation	2	9	0.0173015674694809	0.134757279022858	ENSG00000117650;ENSG00000138160
GO:0048102	autophagic cell death	2	9	0.0173015674694809	0.134757279022858	ENSG00000095970;ENSG00000136943
GO:0048861	leukemia inhibitory factor signaling pathway	2	9	0.0173015674694809	0.134757279022858	ENSG00000128342;ENSG00000145623
GO:0051177	meiotic sister chromatid cohesion	2	9	0.0173015674694809	0.134757279022858	ENSG00000156970;ENSG00000169679
GO:0060054	positive regulation of epithelial cell proliferation involved in wound healing	2	9	0.0173015674694809	0.134757279022858	ENSG00000155760;ENSG00000262406
GO:0061983	meiosis II cell cycle process	2	9	0.0173015674694809	0.134757279022858	ENSG00000156970;ENSG00000169679
GO:1901993	regulation of meiotic cell cycle phase transition	2	9	0.0173015674694809	0.134757279022858	ENSG00000112742;ENSG00000164045
GO:1904776	regulation of protein localization to cell cortex	2	9	0.0173015674694809	0.134757279022858	ENSG00000099812;ENSG00000166851
GO:1905446	regulation of mitochondrial ATP synthesis coupled electron transport	2	9	0.0173015674694809	0.134757279022858	ENSG00000134057;ENSG00000170312
GO:2000096	positive regulation of Wnt signaling pathway, planar cell polarity pathway	2	9	0.0173015674694809	0.134757279022858	ENSG00000107984;ENSG00000153071
GO:0032528	microvillus organization	3	24	0.017406575019114	0.13481563005	ENSG00000006611;ENSG00000075618;ENSG00000076864
GO:0045992	negative regulation of embryonic development	3	24	0.017406575019114	0.13481563005	ENSG00000107984;ENSG00000137573;ENSG00000155760
GO:0060479	lung cell differentiation	3	24	0.017406575019114	0.13481563005	ENSG00000106541;ENSG00000124664;ENSG00000129654
GO:0061162	establishment of monopolar cell polarity	3	24	0.017406575019114	0.13481563005	ENSG00000075618;ENSG00000112655;ENSG00000129654
GO:0051130	positive regulation of cellular component organization	43	1335	0.0175179784879217	0.135488700752737	ENSG00000005884;ENSG00000011422;ENSG00000011426;ENSG00000051523;ENSG00000070087;ENSG00000075618;ENSG00000092929;ENSG00000095970;ENSG00000100985;ENSG00000102359;ENSG00000102837;ENSG00000104435;ENSG00000105894;ENSG00000112655;ENSG00000113758;ENSG00000116741;ENSG00000117399;ENSG00000117650;ENSG00000126787;ENSG00000128342;ENSG00000130427;ENSG00000134057;ENSG00000135549;ENSG00000137285;ENSG00000143320…
GO:0070661	leukocyte proliferation	14	320	0.0175533887035024	0.135572960237944	ENSG00000049130;ENSG00000095970;ENSG00000102034;ENSG00000104951;ENSG00000106123;ENSG00000129654;ENSG00000130427;ENSG00000135077;ENSG00000139514;ENSG00000147889;ENSG00000150782;ENSG00000155659;ENSG00000186818;ENSG00000272398
GO:0030010	establishment of cell polarity	8	142	0.0176880736091039	0.136186124650099	ENSG00000075618;ENSG00000080986;ENSG00000099812;ENSG00000112655;ENSG00000115163;ENSG00000129654;ENSG00000164109;ENSG00000166851
GO:1903829	positive regulation of cellular protein localization	15	352	0.0176883851860433	0.136186124650099	ENSG00000005884;ENSG00000075218;ENSG00000080986;ENSG00000095970;ENSG00000105894;ENSG00000106541;ENSG00000114346;ENSG00000128342;ENSG00000147889;ENSG00000166851;ENSG00000167513;ENSG00000169896;ENSG00000170312;ENSG00000175793;ENSG00000214253
GO:0071345	cellular response to cytokine stimulus	37	1115	0.0177066588830779	0.136186124650099	ENSG00000051523;ENSG00000054598;ENSG00000067057;ENSG00000075618;ENSG00000087245;ENSG00000089685;ENSG00000095970;ENSG00000100985;ENSG00000101057;ENSG00000102007;ENSG00000113083;ENSG00000117525;ENSG00000124491;ENSG00000128342;ENSG00000130427;ENSG00000133110;ENSG00000145623;ENSG00000145708;ENSG00000150782;ENSG00000158869;ENSG00000159399;ENSG00000160181;ENSG00000163735;ENSG00000163739;ENSG00000164761…
GO:0043409	negative regulation of MAPK cascade	9	171	0.018359184494107	0.140525975074338	ENSG00000077942;ENSG00000111206;ENSG00000116741;ENSG00000128342;ENSG00000130829;ENSG00000153233;ENSG00000154277;ENSG00000168078;ENSG00000186818
GO:0009185	ribonucleoside diphosphate metabolic process	8	143	0.0183719498685979	0.140525975074338	ENSG00000054179;ENSG00000067057;ENSG00000067225;ENSG00000074800;ENSG00000111674;ENSG00000149925;ENSG00000159399;ENSG00000170525
GO:0032355	response to estradiol	8	143	0.0183719498685979	0.140525975074338	ENSG00000105894;ENSG00000109846;ENSG00000133110;ENSG00000140505;ENSG00000145386;ENSG00000145708;ENSG00000164171;ENSG00000181019
GO:0006096	glycolytic process	7	116	0.018372564191455	0.140525975074338	ENSG00000067057;ENSG00000067225;ENSG00000074800;ENSG00000111674;ENSG00000149925;ENSG00000159399;ENSG00000170525
GO:0140115	export across plasma membrane	4	44	0.0185727325996468	0.141231838808927	ENSG00000053918;ENSG00000069849;ENSG00000103222;ENSG00000137731
GO:0071453	cellular response to oxygen levels	11	230	0.0186320325362054	0.141231838808927	ENSG00000074800;ENSG00000104419;ENSG00000105894;ENSG00000107159;ENSG00000113739;ENSG00000129521;ENSG00000130427;ENSG00000134057;ENSG00000135245;ENSG00000145386;ENSG00000165168
GO:0046394	carboxylic acid biosynthetic process	18	452	0.0186426291384093	0.141231838808927	ENSG00000038427;ENSG00000067057;ENSG00000067225;ENSG00000074800;ENSG00000083807;ENSG00000111674;ENSG00000130649;ENSG00000132965;ENSG00000140505;ENSG00000148344;ENSG00000149925;ENSG00000159399;ENSG00000160868;ENSG00000164181;ENSG00000164687;ENSG00000170525;ENSG00000179593;ENSG00000183010
GO:0044281	small molecule metabolic process	65	2179	0.0189560756407282	0.141231838808927	ENSG00000005421;ENSG00000038427;ENSG00000054179;ENSG00000067057;ENSG00000067225;ENSG00000074410;ENSG00000074800;ENSG00000083807;ENSG00000085662;ENSG00000087494;ENSG00000095970;ENSG00000103222;ENSG00000104951;ENSG00000106258;ENSG00000106348;ENSG00000107159;ENSG00000110195;ENSG00000111674;ENSG00000111716;ENSG00000114113;ENSG00000117394;ENSG00000122176;ENSG00000123243;ENSG00000129521;ENSG00000130649…
GO:0016053	organic acid biosynthetic process	18	453	0.0190152107857793	0.141231838808927	ENSG00000038427;ENSG00000067057;ENSG00000067225;ENSG00000074800;ENSG00000083807;ENSG00000111674;ENSG00000130649;ENSG00000132965;ENSG00000140505;ENSG00000148344;ENSG00000149925;ENSG00000159399;ENSG00000160868;ENSG00000164181;ENSG00000164687;ENSG00000170525;ENSG00000179593;ENSG00000183010
GO:1900182	positive regulation of protein localization to nucleus	6	91	0.0190713672420068	0.141231838808927	ENSG00000075218;ENSG00000114346;ENSG00000128342;ENSG00000147889;ENSG00000166851;ENSG00000170312
GO:0050921	positive regulation of chemotaxis	8	144	0.019074560440513	0.141231838808927	ENSG00000077782;ENSG00000095970;ENSG00000105894;ENSG00000117525;ENSG00000137285;ENSG00000146070;ENSG00000164171;ENSG00000169429
GO:0071774	response to fibroblast growth factor	8	144	0.019074560440513	0.141231838808927	ENSG00000041982;ENSG00000077782;ENSG00000133110;ENSG00000137573;ENSG00000157613;ENSG00000169429;ENSG00000171241;ENSG00000206557
GO:0006757	ATP generation from ADP	7	117	0.0191669855311502	0.141231838808927	ENSG00000067057;ENSG00000067225;ENSG00000074800;ENSG00000111674;ENSG00000149925;ENSG00000159399;ENSG00000170525
GO:0021782	glial cell development	7	117	0.0191669855311502	0.141231838808927	ENSG00000095970;ENSG00000104419;ENSG00000124766;ENSG00000132470;ENSG00000143546;ENSG00000163220;ENSG00000182240
GO:0007160	cell-matrix adhesion	11	231	0.0191731849677957	0.141231838808927	ENSG00000005884;ENSG00000122861;ENSG00000132470;ENSG00000133110;ENSG00000147889;ENSG00000151882;ENSG00000157227;ENSG00000164171;ENSG00000168743;ENSG00000204580;ENSG00000262406
GO:0006811	ion transport	52	1682	0.0192950025776034	0.141231838808927	ENSG00000005059;ENSG00000019505;ENSG00000051523;ENSG00000053918;ENSG00000069849;ENSG00000074410;ENSG00000075461;ENSG00000083807;ENSG00000085491;ENSG00000088992;ENSG00000089356;ENSG00000092068;ENSG00000095970;ENSG00000096433;ENSG00000100985;ENSG00000102007;ENSG00000103222;ENSG00000103534;ENSG00000104723;ENSG00000105281;ENSG00000107159;ENSG00000110195;ENSG00000111371;ENSG00000116741;ENSG00000117394…
GO:0031399	regulation of protein modification process	57	1873	0.0193577614108091	0.141231838808927	ENSG00000005448;ENSG00000011422;ENSG00000046774;ENSG00000049130;ENSG00000051180;ENSG00000070087;ENSG00000077782;ENSG00000077942;ENSG00000088325;ENSG00000088992;ENSG00000094804;ENSG00000095970;ENSG00000100985;ENSG00000105173;ENSG00000105894;ENSG00000107984;ENSG00000111206;ENSG00000112742;ENSG00000113083;ENSG00000114346;ENSG00000116741;ENSG00000117399;ENSG00000124225;ENSG00000124766;ENSG00000126259…
GO:0003094	glomerular filtration	3	25	0.01944741305661	0.141231838808927	ENSG00000051523;ENSG00000137573;ENSG00000157483
GO:0033032	regulation of myeloid cell apoptotic process	3	25	0.01944741305661	0.141231838808927	ENSG00000049130;ENSG00000130427;ENSG00000147889
GO:0042104	positive regulation of activated T cell proliferation	3	25	0.01944741305661	0.141231838808927	ENSG00000130427;ENSG00000150782;ENSG00000272398
GO:0061339	establishment or maintenance of monopolar cell polarity	3	25	0.01944741305661	0.141231838808927	ENSG00000075618;ENSG00000112655;ENSG00000129654
GO:1905475	regulation of protein localization to membrane	10	202	0.0196046054167797	0.141231838808927	ENSG00000005884;ENSG00000076716;ENSG00000095970;ENSG00000105894;ENSG00000106541;ENSG00000153071;ENSG00000157227;ENSG00000169896;ENSG00000175793;ENSG00000214253
GO:0048771	tissue remodeling	9	173	0.0196410924636316	0.141231838808927	ENSG00000054598;ENSG00000087245;ENSG00000105894;ENSG00000118785;ENSG00000128342;ENSG00000150782;ENSG00000157227;ENSG00000164761;ENSG00000164932
GO:0001890	placenta development	8	145	0.0197961596524913	0.141231838808927	ENSG00000105894;ENSG00000112559;ENSG00000113739;ENSG00000118785;ENSG00000128342;ENSG00000136943;ENSG00000161714;ENSG00000171345
GO:0007178	transmembrane receptor protein serine/threonine kinase signaling pathway	15	357	0.0198051393951447	0.141231838808927	ENSG00000005884;ENSG00000107984;ENSG00000110195;ENSG00000112742;ENSG00000113083;ENSG00000120057;ENSG00000122176;ENSG00000124225;ENSG00000137573;ENSG00000144959;ENSG00000153071;ENSG00000158747;ENSG00000168743;ENSG00000170801;ENSG00000171310
GO:0003333	amino acid transmembrane transport	6	92	0.0200176550717743	0.141231838808927	ENSG00000092068;ENSG00000105281;ENSG00000111371;ENSG00000116741;ENSG00000131389;ENSG00000139514
GO:0070664	negative regulation of leukocyte proliferation	6	92	0.0200176550717743	0.141231838808927	ENSG00000104951;ENSG00000129654;ENSG00000135077;ENSG00000147889;ENSG00000155659;ENSG00000186818
GO:0001774	microglial cell activation	4	45	0.020022493025902	0.141231838808927	ENSG00000095970;ENSG00000109861;ENSG00000169896;ENSG00000176170
GO:1902806	regulation of cell cycle G1/S phase transition	9	174	0.0203057852611363	0.141231838808927	ENSG00000075218;ENSG00000094804;ENSG00000124766;ENSG00000134057;ENSG00000141934;ENSG00000147889;ENSG00000170312;ENSG00000175793;ENSG00000185499
GO:0010646	regulation of cell communication	100	3573	0.0203255359333309	0.141231838808927	ENSG00000005448;ENSG00000005884;ENSG00000011422;ENSG00000035499;ENSG00000049130;ENSG00000051523;ENSG00000070087;ENSG00000074800;ENSG00000075461;ENSG00000076716;ENSG00000076864;ENSG00000077782;ENSG00000077942;ENSG00000080293;ENSG00000085662;ENSG00000088325;ENSG00000089685;ENSG00000090104;ENSG00000092445;ENSG00000095970;ENSG00000096433;ENSG00000100604;ENSG00000100985;ENSG00000105894;ENSG00000106236…
GO:0031346	positive regulation of cell projection organization	16	391	0.0205164277276769	0.141231838808927	ENSG00000005884;ENSG00000011426;ENSG00000075618;ENSG00000104435;ENSG00000105894;ENSG00000112655;ENSG00000113758;ENSG00000116741;ENSG00000130427;ENSG00000137285;ENSG00000143320;ENSG00000147852;ENSG00000163220;ENSG00000164171;ENSG00000187688;ENSG00000198758
GO:0010720	positive regulation of cell development	21	558	0.0205325135874713	0.141231838808927	ENSG00000005884;ENSG00000077782;ENSG00000091129;ENSG00000092929;ENSG00000095970;ENSG00000102837;ENSG00000104435;ENSG00000105894;ENSG00000112655;ENSG00000113758;ENSG00000114346;ENSG00000116741;ENSG00000128342;ENSG00000130427;ENSG00000137285;ENSG00000143320;ENSG00000147852;ENSG00000158747;ENSG00000163220;ENSG00000187688;ENSG00000244405
GO:1903708	positive regulation of hemopoiesis	10	204	0.0208330439451453	0.141231838808927	ENSG00000049130;ENSG00000054598;ENSG00000088992;ENSG00000095970;ENSG00000104951;ENSG00000124766;ENSG00000128342;ENSG00000150782;ENSG00000157227;ENSG00000186818
GO:0071310	cellular response to organic substance	78	2699	0.0208703159982823	0.141231838808927	ENSG00000005884;ENSG00000041982;ENSG00000051180;ENSG00000051523;ENSG00000053918;ENSG00000054598;ENSG00000067057;ENSG00000067225;ENSG00000075618;ENSG00000076864;ENSG00000077782;ENSG00000085662;ENSG00000087245;ENSG00000088992;ENSG00000089685;ENSG00000094804;ENSG00000095970;ENSG00000100985;ENSG00000101057;ENSG00000102007;ENSG00000103222;ENSG00000104435;ENSG00000105894;ENSG00000106541;ENSG00000110195…
GO:0009206	purine ribonucleoside triphosphate biosynthetic process	9	175	0.0209865695074604	0.141231838808927	ENSG00000067057;ENSG00000067225;ENSG00000074800;ENSG00000095970;ENSG00000106348;ENSG00000111674;ENSG00000149925;ENSG00000159399;ENSG00000170525
GO:0032642	regulation of chemokine production	6	93	0.0209953669606644	0.141231838808927	ENSG00000095970;ENSG00000133110;ENSG00000135077;ENSG00000150782;ENSG00000179593;ENSG00000186818
GO:0046620	regulation of organ growth	6	93	0.0209953669606644	0.141231838808927	ENSG00000054598;ENSG00000116741;ENSG00000130829;ENSG00000134057;ENSG00000160211;ENSG00000170312
GO:0005996	monosaccharide metabolic process	13	296	0.0210238839541558	0.141231838808927	ENSG00000067057;ENSG00000067225;ENSG00000074800;ENSG00000085662;ENSG00000111674;ENSG00000117394;ENSG00000149925;ENSG00000159399;ENSG00000160211;ENSG00000163931;ENSG00000164687;ENSG00000170525;ENSG00000215644
GO:0007166	cell surface receptor signaling pathway	88	3098	0.021233068492802	0.141231838808927	ENSG00000005448;ENSG00000005884;ENSG00000011422;ENSG00000035499;ENSG00000049130;ENSG00000051523;ENSG00000054598;ENSG00000075461;ENSG00000075618;ENSG00000076716;ENSG00000077782;ENSG00000080293;ENSG00000087245;ENSG00000089685;ENSG00000092445;ENSG00000095970;ENSG00000100985;ENSG00000102007;ENSG00000105173;ENSG00000105894;ENSG00000106123;ENSG00000106541;ENSG00000107984;ENSG00000110195;ENSG00000112559…
GO:0015911	plasma membrane long-chain fatty acid transport	2	10	0.0212990544404615	0.141231838808927	ENSG00000083807;ENSG00000117394
GO:0030388	fructose 1,6-bisphosphate metabolic process	2	10	0.0212990544404615	0.141231838808927	ENSG00000067057;ENSG00000149925
GO:0033314	mitotic DNA replication checkpoint	2	10	0.0212990544404615	0.141231838808927	ENSG00000085840;ENSG00000094804
GO:0035404	histone-serine phosphorylation	2	10	0.0212990544404615	0.141231838808927	ENSG00000134057;ENSG00000178999
GO:0051660	establishment of centrosome localization	2	10	0.0212990544404615	0.141231838808927	ENSG00000099812;ENSG00000164109
GO:0061052	negative regulation of cell growth involved in cardiac muscle cell development	2	10	0.0212990544404615	0.141231838808927	ENSG00000116741;ENSG00000160211
GO:0061140	lung secretory cell differentiation	2	10	0.0212990544404615	0.141231838808927	ENSG00000106541;ENSG00000124664
GO:1901978	positive regulation of cell cycle checkpoint	2	10	0.0212990544404615	0.141231838808927	ENSG00000080986;ENSG00000164109
GO:0042981	regulation of apoptotic process	48	1541	0.0214697306240072	0.141231838808927	ENSG00000011422;ENSG00000049130;ENSG00000054598;ENSG00000074800;ENSG00000077782;ENSG00000085662;ENSG00000089685;ENSG00000092445;ENSG00000095970;ENSG00000100985;ENSG00000101057;ENSG00000104419;ENSG00000105894;ENSG00000107984;ENSG00000109846;ENSG00000109861;ENSG00000113083;ENSG00000114346;ENSG00000117525;ENSG00000124664;ENSG00000124766;ENSG00000129521;ENSG00000130427;ENSG00000130829;ENSG00000131747…
GO:0002707	negative regulation of lymphocyte mediated immunity	4	46	0.0215400862687046	0.141231838808927	ENSG00000104951;ENSG00000129654;ENSG00000135077;ENSG00000186818
GO:0006706	steroid catabolic process	3	26	0.0216146334729059	0.141231838808927	ENSG00000118785;ENSG00000140505;ENSG00000160868
GO:0032703	negative regulation of interleukin-2 production	3	26	0.0216146334729059	0.141231838808927	ENSG00000135077;ENSG00000155659;ENSG00000186818
GO:0050927	positive regulation of positive chemotaxis	3	26	0.0216146334729059	0.141231838808927	ENSG00000117525;ENSG00000164171;ENSG00000169429
GO:0051156	glucose 6-phosphate metabolic process	3	26	0.0216146334729059	0.141231838808927	ENSG00000159399;ENSG00000160211;ENSG00000163931
GO:1904353	regulation of telomere capping	3	26	0.0216146334729059	0.141231838808927	ENSG00000117650;ENSG00000135549;ENSG00000178999
GO:0002009	morphogenesis of an epithelium	21	561	0.021628744789799	0.141231838808927	ENSG00000041982;ENSG00000076716;ENSG00000107159;ENSG00000107984;ENSG00000110195;ENSG00000112655;ENSG00000124766;ENSG00000128342;ENSG00000128422;ENSG00000137573;ENSG00000153071;ENSG00000155760;ENSG00000157227;ENSG00000164379;ENSG00000164932;ENSG00000168743;ENSG00000184292;ENSG00000204580;ENSG00000206557;ENSG00000260027;ENSG00000262406
GO:0009145	purine nucleoside triphosphate biosynthetic process	9	176	0.0216836418638302	0.141231838808927	ENSG00000067057;ENSG00000067225;ENSG00000074800;ENSG00000095970;ENSG00000106348;ENSG00000111674;ENSG00000149925;ENSG00000159399;ENSG00000170525
GO:0042866	pyruvate biosynthetic process	7	120	0.0216940280855029	0.141231838808927	ENSG00000067057;ENSG00000067225;ENSG00000074800;ENSG00000111674;ENSG00000149925;ENSG00000159399;ENSG00000170525
GO:0070192	chromosome organization involved in meiotic cell cycle	5	69	0.0218085306423966	0.141231838808927	ENSG00000051180;ENSG00000071539;ENSG00000105173;ENSG00000156970;ENSG00000169679
GO:0032602	chemokine production	6	94	0.0220049212110659	0.141231838808927	ENSG00000095970;ENSG00000133110;ENSG00000135077;ENSG00000150782;ENSG00000179593;ENSG00000186818
GO:0072080	nephron tubule development	6	94	0.0220049212110659	0.141231838808927	ENSG00000007062;ENSG00000128342;ENSG00000168743;ENSG00000184292;ENSG00000260027;ENSG00000272398
GO:0019359	nicotinamide nucleotide biosynthetic process	8	148	0.0220773837540552	0.141231838808927	ENSG00000067057;ENSG00000067225;ENSG00000074800;ENSG00000111674;ENSG00000149925;ENSG00000159399;ENSG00000170525;ENSG00000204653
GO:0019363	pyridine nucleotide biosynthetic process	8	148	0.0220773837540552	0.141231838808927	ENSG00000067057;ENSG00000067225;ENSG00000074800;ENSG00000111674;ENSG00000149925;ENSG00000159399;ENSG00000170525;ENSG00000204653
GO:0007159	leukocyte cell-cell adhesion	15	362	0.022109252244599	0.141231838808927	ENSG00000104951;ENSG00000106123;ENSG00000124766;ENSG00000129654;ENSG00000130427;ENSG00000135077;ENSG00000139514;ENSG00000143546;ENSG00000147889;ENSG00000150782;ENSG00000151882;ENSG00000155659;ENSG00000163220;ENSG00000186818;ENSG00000272398
GO:1990266	neutrophil migration	7	121	0.0225853580152141	0.141231838808927	ENSG00000143546;ENSG00000158869;ENSG00000163220;ENSG00000163735;ENSG00000163739;ENSG00000169347;ENSG00000169429
GO:0042692	muscle cell differentiation	15	363	0.0225933912404191	0.141231838808927	ENSG00000107984;ENSG00000113083;ENSG00000116741;ENSG00000123095;ENSG00000128591;ENSG00000134057;ENSG00000138119;ENSG00000154277;ENSG00000155760;ENSG00000157227;ENSG00000160211;ENSG00000168743;ENSG00000170312;ENSG00000171345;ENSG00000187957
GO:1901137	carbohydrate derivative biosynthetic process	27	773	0.022598619206972	0.141231838808927	ENSG00000038427;ENSG00000067057;ENSG00000067225;ENSG00000074800;ENSG00000076716;ENSG00000095970;ENSG00000104723;ENSG00000106348;ENSG00000111674;ENSG00000122176;ENSG00000128242;ENSG00000136840;ENSG00000140297;ENSG00000140835;ENSG00000149925;ENSG00000156966;ENSG00000159399;ENSG00000160211;ENSG00000163931;ENSG00000164181;ENSG00000170525;ENSG00000171310;ENSG00000175040;ENSG00000182240;ENSG00000185499…
GO:0090287	regulation of cellular response to growth factor stimulus	13	299	0.0226095501294489	0.141231838808927	ENSG00000005884;ENSG00000077782;ENSG00000110195;ENSG00000113083;ENSG00000120057;ENSG00000124225;ENSG00000137573;ENSG00000153071;ENSG00000157613;ENSG00000158747;ENSG00000168743;ENSG00000170801;ENSG00000171310
GO:0061061	muscle structure development	23	633	0.0227608695837759	0.141231838808927	ENSG00000054598;ENSG00000069011;ENSG00000107984;ENSG00000109846;ENSG00000113083;ENSG00000116741;ENSG00000117724;ENSG00000123095;ENSG00000128342;ENSG00000128591;ENSG00000134057;ENSG00000138119;ENSG00000150782;ENSG00000154277;ENSG00000155760;ENSG00000157227;ENSG00000160211;ENSG00000163359;ENSG00000168743;ENSG00000170312;ENSG00000171345;ENSG00000178860;ENSG00000187957
GO:0001707	mesoderm formation	5	70	0.0230548939202157	0.141231838808927	ENSG00000005884;ENSG00000054598;ENSG00000107984;ENSG00000132470;ENSG00000164171
GO:0051640	organelle localization	26	739	0.0230677000357612	0.141231838808927	ENSG00000070087;ENSG00000080986;ENSG00000092929;ENSG00000099812;ENSG00000100604;ENSG00000109861;ENSG00000110195;ENSG00000115163;ENSG00000117650;ENSG00000117724;ENSG00000126787;ENSG00000129354;ENSG00000134057;ENSG00000134690;ENSG00000142945;ENSG00000143228;ENSG00000145920;ENSG00000146670;ENSG00000154277;ENSG00000157483;ENSG00000164109;ENSG00000166851;ENSG00000167513;ENSG00000170312;ENSG00000178999…
GO:0045843	negative regulation of striated muscle tissue development	4	47	0.0231262211013469	0.141231838808927	ENSG00000107984;ENSG00000116741;ENSG00000155760;ENSG00000160211
GO:0000741	karyogamy	1	1	0.0231640647015726	0.141231838808927	ENSG00000170312
GO:0000921	septin ring assembly	1	1	0.0231640647015726	0.141231838808927	ENSG00000011426
GO:0001715	ectodermal cell fate specification	1	1	0.0231640647015726	0.141231838808927	ENSG00000155760
GO:0002404	antigen sampling in mucosal-associated lymphoid tissue	1	1	0.0231640647015726	0.141231838808927	ENSG00000169347
GO:0002406	antigen sampling by M cells in mucosal-associated lymphoid tissue	1	1	0.0231640647015726	0.141231838808927	ENSG00000169347
GO:0002412	antigen transcytosis by M cells in mucosal-associated lymphoid tissue	1	1	0.0231640647015726	0.141231838808927	ENSG00000169347
GO:0002432	granuloma formation	1	1	0.0231640647015726	0.141231838808927	ENSG00000092929
GO:0002510	central B cell tolerance induction	1	1	0.0231640647015726	0.141231838808927	ENSG00000129654
GO:0002646	regulation of central tolerance induction	1	1	0.0231640647015726	0.141231838808927	ENSG00000129654
GO:0002648	positive regulation of central tolerance induction	1	1	0.0231640647015726	0.141231838808927	ENSG00000129654
GO:0002895	regulation of central B cell tolerance induction	1	1	0.0231640647015726	0.141231838808927	ENSG00000129654
GO:0002897	positive regulation of central B cell tolerance induction	1	1	0.0231640647015726	0.141231838808927	ENSG00000129654
GO:0003083	negative regulation of renal output by angiotensin	1	1	0.0231640647015726	0.141231838808927	ENSG00000051523
GO:0003106	negative regulation of glomerular filtration by angiotensin	1	1	0.0231640647015726	0.141231838808927	ENSG00000051523
GO:0003147	neural crest cell migration involved in heart formation	1	1	0.0231640647015726	0.141231838808927	ENSG00000110195
GO:0006061	sorbitol biosynthetic process	1	1	0.0231640647015726	0.141231838808927	ENSG00000085662
GO:0006530	asparagine catabolic process	1	1	0.0231640647015726	0.141231838808927	ENSG00000162174
GO:0007344	pronuclear fusion	1	1	0.0231640647015726	0.141231838808927	ENSG00000170312
GO:0008591	regulation of Wnt signaling pathway, calcium modulating pathway	1	1	0.0231640647015726	0.141231838808927	ENSG00000107984
GO:0009683	indoleacetic acid metabolic process	1	1	0.0231640647015726	0.141231838808927	ENSG00000104951
GO:0010585	glutamine secretion	1	1	0.0231640647015726	0.141231838808927	ENSG00000105281
GO:0014895	smooth muscle hypertrophy	1	1	0.0231640647015726	0.141231838808927	ENSG00000051523
GO:0015829	valine transport	1	1	0.0231640647015726	0.141231838808927	ENSG00000092068
GO:0018885	carbon tetrachloride metabolic process	1	1	0.0231640647015726	0.141231838808927	ENSG00000130649
GO:0018910	benzene metabolic process	1	1	0.0231640647015726	0.141231838808927	ENSG00000130649
GO:0018960	4-nitrophenol metabolic process	1	1	0.0231640647015726	0.141231838808927	ENSG00000130649
GO:0019406	hexitol biosynthetic process	1	1	0.0231640647015726	0.141231838808927	ENSG00000085662
GO:0019440	tryptophan catabolic process to indole-3-acetate	1	1	0.0231640647015726	0.141231838808927	ENSG00000104951
GO:0022013	pallium cell proliferation in forebrain	1	1	0.0231640647015726	0.141231838808927	ENSG00000159217
GO:0031104	dendrite regeneration	1	1	0.0231640647015726	0.141231838808927	ENSG00000105894
GO:0032595	B cell receptor transport within lipid bilayer	1	1	0.0231640647015726	0.141231838808927	ENSG00000272398
GO:0032597	B cell receptor transport into membrane raft	1	1	0.0231640647015726	0.141231838808927	ENSG00000272398
GO:0032599	protein transport out of membrane raft	1	1	0.0231640647015726	0.141231838808927	ENSG00000272398
GO:0032600	chemokine receptor transport out of membrane raft	1	1	0.0231640647015726	0.141231838808927	ENSG00000272398
GO:0032712	negative regulation of interleukin-3 production	1	1	0.0231640647015726	0.141231838808927	ENSG00000135077
GO:0032913	negative regulation of transforming growth factor beta3 production	1	1	0.0231640647015726	0.141231838808927	ENSG00000272398
GO:0033026	negative regulation of mast cell apoptotic process	1	1	0.0231640647015726	0.141231838808927	ENSG00000049130
GO:0033316	meiotic spindle assembly checkpoint	1	1	0.0231640647015726	0.141231838808927	ENSG00000112742
GO:0033343	positive regulation of collagen binding	1	1	0.0231640647015726	0.141231838808927	ENSG00000164171
GO:0033345	asparagine catabolic process via L-aspartate	1	1	0.0231640647015726	0.141231838808927	ENSG00000162174
GO:0033606	chemokine receptor transport within lipid bilayer	1	1	0.0231640647015726	0.141231838808927	ENSG00000272398
GO:0035026	leading edge cell differentiation	1	1	0.0231640647015726	0.141231838808927	ENSG00000153071
GO:0035906	descending aorta development	1	1	0.0231640647015726	0.141231838808927	ENSG00000113083
GO:0038118	C-C chemokine receptor CCR7 signaling pathway	1	1	0.0231640647015726	0.141231838808927	ENSG00000095970
GO:0042665	regulation of ectodermal cell fate specification	1	1	0.0231640647015726	0.141231838808927	ENSG00000155760
GO:0042666	negative regulation of ectodermal cell fate specification	1	1	0.0231640647015726	0.141231838808927	ENSG00000155760
GO:0044333	Wnt signaling pathway involved in digestive tract morphogenesis	1	1	0.0231640647015726	0.141231838808927	ENSG00000120057
GO:0045584	negative regulation of cytotoxic T cell differentiation	1	1	0.0231640647015726	0.141231838808927	ENSG00000186818
GO:0045813	positive regulation of Wnt signaling pathway, calcium modulating pathway	1	1	0.0231640647015726	0.141231838808927	ENSG00000107984
GO:0046521	sphingoid catabolic process	1	1	0.0231640647015726	0.141231838808927	ENSG00000176170
GO:0046680	response to DDT	1	1	0.0231640647015726	0.141231838808927	ENSG00000134057
GO:0048673	collateral sprouting of intact axon in response to injury	1	1	0.0231640647015726	0.141231838808927	ENSG00000118785
GO:0048683	regulation of collateral sprouting of intact axon in response to injury	1	1	0.0231640647015726	0.141231838808927	ENSG00000118785
GO:0048685	negative regulation of collateral sprouting of intact axon in response to injury	1	1	0.0231640647015726	0.141231838808927	ENSG00000118785
GO:0051460	negative regulation of corticotropin secretion	1	1	0.0231640647015726	0.141231838808927	ENSG00000145708
GO:0052371	regulation by organism of entry into other organism involved in symbiotic interaction	1	1	0.0231640647015726	0.141231838808927	ENSG00000174992
GO:0052373	negative regulation by organism of entry into other organism involved in symbiotic interaction	1	1	0.0231640647015726	0.141231838808927	ENSG00000174992
GO:0060739	mesenchymal-epithelial cell signaling involved in prostate gland development	1	1	0.0231640647015726	0.141231838808927	ENSG00000041982
GO:0070392	detection of lipoteichoic acid	1	1	0.0231640647015726	0.141231838808927	ENSG00000095970
GO:0071656	negative regulation of granulocyte colony-stimulating factor production	1	1	0.0231640647015726	0.141231838808927	ENSG00000135077
GO:0071877	regulation of adenylate cyclase-inhibiting adrenergic receptor signaling pathway	1	1	0.0231640647015726	0.141231838808927	ENSG00000116741
GO:0072016	glomerular parietal epithelial cell development	1	1	0.0231640647015726	0.141231838808927	ENSG00000129654
GO:0086030	adenylate cyclase-activating adrenergic receptor signaling pathway involved in cardiac muscle relaxation	1	1	0.0231640647015726	0.141231838808927	ENSG00000100604
GO:0086096	adenylate cyclase-inhibiting adrenergic receptor signaling pathway involved in heart process	1	1	0.0231640647015726	0.141231838808927	ENSG00000116741
GO:0140193	regulation of adenylate cyclase-inhibiting adrenergic receptor signaling pathway involved in heart process	1	1	0.0231640647015726	0.141231838808927	ENSG00000116741
GO:0140194	negative regulation of adenylate cyclase-inhibiting adrenergic receptor signaling pathway involved in heart process	1	1	0.0231640647015726	0.141231838808927	ENSG00000116741
GO:1900010	regulation of corticotropin-releasing hormone receptor activity	1	1	0.0231640647015726	0.141231838808927	ENSG00000145708
GO:1900011	negative regulation of corticotropin-releasing hormone receptor activity	1	1	0.0231640647015726	0.141231838808927	ENSG00000145708
GO:1901248	positive regulation of lung ciliated cell differentiation	1	1	0.0231640647015726	0.141231838808927	ENSG00000129654
GO:1901257	negative regulation of macrophage colony-stimulating factor production	1	1	0.0231640647015726	0.141231838808927	ENSG00000135077
GO:1901296	negative regulation of canonical Wnt signaling pathway involved in cardiac muscle cell fate commitment	1	1	0.0231640647015726	0.141231838808927	ENSG00000107984
GO:1901676	positive regulation of histone H3-K27 acetylation	1	1	0.0231640647015726	0.141231838808927	ENSG00000128342
GO:1901696	cannabinoid biosynthetic process	1	1	0.0231640647015726	0.141231838808927	ENSG00000179593
GO:1902038	positive regulation of hematopoietic stem cell differentiation	1	1	0.0231640647015726	0.141231838808927	ENSG00000054598
GO:1902217	erythrocyte apoptotic process	1	1	0.0231640647015726	0.141231838808927	ENSG00000130427
GO:1902250	regulation of erythrocyte apoptotic process	1	1	0.0231640647015726	0.141231838808927	ENSG00000130427
GO:1902251	negative regulation of erythrocyte apoptotic process	1	1	0.0231640647015726	0.141231838808927	ENSG00000130427
GO:1902296	DNA strand elongation involved in cell cycle DNA replication	1	1	0.0231640647015726	0.141231838808927	ENSG00000101003
GO:1902319	DNA strand elongation involved in nuclear cell cycle DNA replication	1	1	0.0231640647015726	0.141231838808927	ENSG00000101003
GO:1902491	negative regulation of sperm capacitation	1	1	0.0231640647015726	0.141231838808927	ENSG00000122133
GO:1902977	mitotic DNA replication preinitiation complex assembly	1	1	0.0231640647015726	0.141231838808927	ENSG00000093009
GO:1902983	DNA strand elongation involved in mitotic DNA replication	1	1	0.0231640647015726	0.141231838808927	ENSG00000101003
GO:1903080	regulation of C-C chemokine receptor CCR7 signaling pathway	1	1	0.0231640647015726	0.141231838808927	ENSG00000095970
GO:1903082	positive regulation of C-C chemokine receptor CCR7 signaling pathway	1	1	0.0231640647015726	0.141231838808927	ENSG00000095970
GO:1903096	protein localization to meiotic spindle midzone	1	1	0.0231640647015726	0.141231838808927	ENSG00000112742
GO:1903126	negative regulation of centriole-centriole cohesion	1	1	0.0231640647015726	0.141231838808927	ENSG00000117650
GO:1903697	negative regulation of microvillus assembly	1	1	0.0231640647015726	0.141231838808927	ENSG00000076864
GO:1903803	L-glutamine import across plasma membrane	1	1	0.0231640647015726	0.141231838808927	ENSG00000105281
GO:1903810	L-histidine import across plasma membrane	1	1	0.0231640647015726	0.141231838808927	ENSG00000139514
GO:1904187	regulation of transformation of host cell by virus	1	1	0.0231640647015726	0.141231838808927	ENSG00000077942
GO:1904188	negative regulation of transformation of host cell by virus	1	1	0.0231640647015726	0.141231838808927	ENSG00000077942
GO:1904389	rod bipolar cell differentiation	1	1	0.0231640647015726	0.141231838808927	ENSG00000105894
GO:1904391	response to ciliary neurotrophic factor	1	1	0.0231640647015726	0.141231838808927	ENSG00000105894
GO:1904441	regulation of thyroid gland epithelial cell proliferation	1	1	0.0231640647015726	0.141231838808927	ENSG00000076864
GO:1904442	negative regulation of thyroid gland epithelial cell proliferation	1	1	0.0231640647015726	0.141231838808927	ENSG00000076864
GO:1904631	response to glucoside	1	1	0.0231640647015726	0.141231838808927	ENSG00000051180
GO:1904701	Wnt-Frizzled-LRP5/6 complex assembly	1	1	0.0231640647015726	0.141231838808927	ENSG00000107984
GO:1904711	regulation of Wnt-Frizzled-LRP5/6 complex assembly	1	1	0.0231640647015726	0.141231838808927	ENSG00000107984
GO:1904723	negative regulation of Wnt-Frizzled-LRP5/6 complex assembly	1	1	0.0231640647015726	0.141231838808927	ENSG00000107984
GO:1904905	negative regulation of endothelial cell-matrix adhesion via fibronectin	1	1	0.0231640647015726	0.141231838808927	ENSG00000262406
GO:1905067	negative regulation of canonical Wnt signaling pathway involved in heart development	1	1	0.0231640647015726	0.141231838808927	ENSG00000107984
GO:1905115	regulation of lateral attachment of mitotic spindle microtubules to kinetochore	1	1	0.0231640647015726	0.141231838808927	ENSG00000178999
GO:1905116	positive regulation of lateral attachment of mitotic spindle microtubules to kinetochore	1	1	0.0231640647015726	0.141231838808927	ENSG00000178999
GO:1905183	negative regulation of protein serine/threonine phosphatase activity	1	1	0.0231640647015726	0.141231838808927	ENSG00000166143
GO:1905291	positive regulation of CAMKK-AMPK signaling cascade	1	1	0.0231640647015726	0.141231838808927	ENSG00000095970
GO:1905341	negative regulation of protein localization to kinetochore	1	1	0.0231640647015726	0.141231838808927	ENSG00000167513
GO:1905359	protein localization to meiotic spindle	1	1	0.0231640647015726	0.141231838808927	ENSG00000112742
GO:1905364	regulation of endosomal vesicle fusion	1	1	0.0231640647015726	0.141231838808927	ENSG00000176170
GO:1990789	thyroid gland epithelial cell proliferation	1	1	0.0231640647015726	0.141231838808927	ENSG00000076864
GO:2000056	regulation of Wnt signaling pathway involved in digestive tract morphogenesis	1	1	0.0231640647015726	0.141231838808927	ENSG00000120057
GO:2000057	negative regulation of Wnt signaling pathway involved in digestive tract morphogenesis	1	1	0.0231640647015726	0.141231838808927	ENSG00000120057
GO:2000350	positive regulation of CD40 signaling pathway	1	1	0.0231640647015726	0.141231838808927	ENSG00000095970
GO:2000431	regulation of cytokinesis, actomyosin contractile ring assembly	1	1	0.0231640647015726	0.141231838808927	ENSG00000114346
GO:2000759	regulation of N-terminal peptidyl-lysine acetylation	1	1	0.0231640647015726	0.141231838808927	ENSG00000124766
GO:2000761	positive regulation of N-terminal peptidyl-lysine acetylation	1	1	0.0231640647015726	0.141231838808927	ENSG00000124766
GO:2000775	histone H3-S10 phosphorylation involved in chromosome condensation	1	1	0.0231640647015726	0.141231838808927	ENSG00000134057
GO:2001246	negative regulation of phosphatidylcholine biosynthetic process	1	1	0.0231640647015726	0.141231838808927	ENSG00000153395
GO:0050808	synapse organization	17	430	0.0232236518942773	0.141439201514707	ENSG00000005884;ENSG00000041982;ENSG00000070087;ENSG00000076716;ENSG00000091129;ENSG00000095970;ENSG00000102359;ENSG00000104419;ENSG00000105894;ENSG00000107984;ENSG00000113758;ENSG00000117399;ENSG00000169862;ENSG00000169896;ENSG00000175344;ENSG00000187957;ENSG00000225968
GO:0051172	negative regulation of nitrogen compound metabolic process	73	2517	0.0235513023807661	0.143276900072208	ENSG00000011422;ENSG00000050344;ENSG00000054598;ENSG00000069011;ENSG00000074800;ENSG00000077942;ENSG00000088992;ENSG00000089685;ENSG00000093009;ENSG00000094804;ENSG00000100985;ENSG00000101443;ENSG00000104341;ENSG00000105173;ENSG00000105894;ENSG00000107984;ENSG00000109846;ENSG00000111206;ENSG00000112559;ENSG00000116741;ENSG00000117525;ENSG00000117724;ENSG00000118849;ENSG00000123095;ENSG00000123243…
GO:0048646	anatomical structure formation involved in morphogenesis	36	1102	0.0236464598367485	0.143549360472119	ENSG00000005884;ENSG00000007062;ENSG00000054598;ENSG00000067225;ENSG00000087245;ENSG00000091129;ENSG00000091136;ENSG00000092929;ENSG00000095970;ENSG00000100985;ENSG00000102359;ENSG00000105894;ENSG00000107984;ENSG00000110195;ENSG00000112655;ENSG00000117525;ENSG00000124766;ENSG00000129654;ENSG00000132470;ENSG00000137573;ENSG00000138119;ENSG00000143125;ENSG00000150782;ENSG00000155760;ENSG00000157227…
GO:0006091	generation of precursor metabolites and energy	20	532	0.0236480049530018	0.143549360472119	ENSG00000051523;ENSG00000067057;ENSG00000067225;ENSG00000074800;ENSG00000083807;ENSG00000085662;ENSG00000111674;ENSG00000111713;ENSG00000116701;ENSG00000134057;ENSG00000139547;ENSG00000140505;ENSG00000149925;ENSG00000159399;ENSG00000165168;ENSG00000166920;ENSG00000170312;ENSG00000170525;ENSG00000185633;ENSG00000215644
GO:0061351	neural precursor cell proliferation	8	150	0.023697655799942	0.143693022558859	ENSG00000105894;ENSG00000113758;ENSG00000159217;ENSG00000161800;ENSG00000165304;ENSG00000171241;ENSG00000206557;ENSG00000253368
GO:0071103	DNA conformation change	14	333	0.0237609870417476	0.143710203166139	ENSG00000051180;ENSG00000100162;ENSG00000109805;ENSG00000115163;ENSG00000121152;ENSG00000123485;ENSG00000131747;ENSG00000134057;ENSG00000137309;ENSG00000146670;ENSG00000147889;ENSG00000159259;ENSG00000166851;ENSG00000170312
GO:0010971	positive regulation of G2/M transition of mitotic cell cycle	3	27	0.0239083882301713	0.143710203166139	ENSG00000134057;ENSG00000164045;ENSG00000170312
GO:0043032	positive regulation of macrophage activation	3	27	0.0239083882301713	0.143710203166139	ENSG00000095970;ENSG00000109861;ENSG00000135077
GO:0050926	regulation of positive chemotaxis	3	27	0.0239083882301713	0.143710203166139	ENSG00000117525;ENSG00000164171;ENSG00000169429
GO:0060706	cell differentiation involved in embryonic placenta development	3	27	0.0239083882301713	0.143710203166139	ENSG00000112559;ENSG00000128342;ENSG00000171345
GO:0071280	cellular response to copper ion	3	27	0.0239083882301713	0.143710203166139	ENSG00000140505;ENSG00000169715;ENSG00000187193
GO:1901018	positive regulation of potassium ion transmembrane transporter activity	3	27	0.0239083882301713	0.143710203166139	ENSG00000069849;ENSG00000095970;ENSG00000137731
GO:1901071	glucosamine-containing compound metabolic process	3	27	0.0239083882301713	0.143710203166139	ENSG00000133063;ENSG00000140835;ENSG00000175040
GO:0046364	monosaccharide biosynthetic process	6	96	0.024121167926729	0.144831768333129	ENSG00000074800;ENSG00000085662;ENSG00000111674;ENSG00000149925;ENSG00000160211;ENSG00000163931
GO:0097435	supramolecular fiber organization	29	850	0.0244427496605188	0.14644809494397	ENSG00000006611;ENSG00000034510;ENSG00000049089;ENSG00000054598;ENSG00000058085;ENSG00000070087;ENSG00000075618;ENSG00000088325;ENSG00000104435;ENSG00000109846;ENSG00000113083;ENSG00000113758;ENSG00000122176;ENSG00000124429;ENSG00000128422;ENSG00000132470;ENSG00000141756;ENSG00000142945;ENSG00000147889;ENSG00000149925;ENSG00000157483;ENSG00000163359;ENSG00000171345;ENSG00000175084;ENSG00000175130…
GO:0001952	regulation of cell-matrix adhesion	7	123	0.0244433257926373	0.14644809494397	ENSG00000122861;ENSG00000133110;ENSG00000147889;ENSG00000151882;ENSG00000157227;ENSG00000204580;ENSG00000262406
GO:0072525	pyridine-containing compound biosynthetic process	8	151	0.0245383394323985	0.146858243572688	ENSG00000067057;ENSG00000067225;ENSG00000074800;ENSG00000111674;ENSG00000149925;ENSG00000159399;ENSG00000170525;ENSG00000204653
GO:0016192	vesicle-mediated transport	64	2170	0.024623107894346	0.147140216420305	ENSG00000005448;ENSG00000011028;ENSG00000011422;ENSG00000019505;ENSG00000051523;ENSG00000067225;ENSG00000070087;ENSG00000075461;ENSG00000090889;ENSG00000092445;ENSG00000092929;ENSG00000095970;ENSG00000100604;ENSG00000100985;ENSG00000102837;ENSG00000104341;ENSG00000106348;ENSG00000107984;ENSG00000109861;ENSG00000110195;ENSG00000116701;ENSG00000122861;ENSG00000124491;ENSG00000129354;ENSG00000133063…
GO:0051099	positive regulation of binding	9	180	0.0246386691510312	0.147140216420305	ENSG00000005421;ENSG00000011422;ENSG00000054598;ENSG00000100985;ENSG00000106123;ENSG00000146670;ENSG00000164171;ENSG00000164932;ENSG00000167513
GO:0002269	leukocyte activation involved in inflammatory response	4	48	0.0247815338077532	0.147198584271617	ENSG00000095970;ENSG00000109861;ENSG00000169896;ENSG00000176170
GO:0007019	microtubule depolymerization	4	48	0.0247815338077532	0.147198584271617	ENSG00000088325;ENSG00000104435;ENSG00000142945;ENSG00000186185
GO:0033628	regulation of cell adhesion mediated by integrin	4	48	0.0247815338077532	0.147198584271617	ENSG00000088992;ENSG00000122861;ENSG00000128342;ENSG00000185499
GO:0048635	negative regulation of muscle organ development	4	48	0.0247815338077532	0.147198584271617	ENSG00000107984;ENSG00000116741;ENSG00000155760;ENSG00000160211
GO:1905207	regulation of cardiocyte differentiation	4	48	0.0247815338077532	0.147198584271617	ENSG00000107984;ENSG00000116741;ENSG00000155760;ENSG00000160211
GO:0034308	primary alcohol metabolic process	6	97	0.0252286340348565	0.148567395556945	ENSG00000085662;ENSG00000106258;ENSG00000139547;ENSG00000140505;ENSG00000160868;ENSG00000227471
GO:0061326	renal tubule development	6	97	0.0252286340348565	0.148567395556945	ENSG00000007062;ENSG00000128342;ENSG00000168743;ENSG00000184292;ENSG00000260027;ENSG00000272398
GO:2000045	regulation of G1/S transition of mitotic cell cycle	8	152	0.0253996949549145	0.148567395556945	ENSG00000075218;ENSG00000094804;ENSG00000124766;ENSG00000134057;ENSG00000147889;ENSG00000170312;ENSG00000175793;ENSG00000185499
GO:2000241	regulation of reproductive process	8	152	0.0253996949549145	0.148567395556945	ENSG00000071539;ENSG00000112742;ENSG00000117399;ENSG00000122133;ENSG00000128342;ENSG00000137573;ENSG00000145685;ENSG00000164045
GO:0009201	ribonucleoside triphosphate biosynthetic process	9	181	0.0254200542219462	0.148567395556945	ENSG00000067057;ENSG00000067225;ENSG00000074800;ENSG00000095970;ENSG00000106348;ENSG00000111674;ENSG00000149925;ENSG00000159399;ENSG00000170525
GO:0001787	natural killer cell proliferation	2	11	0.0256382628394456	0.148567395556945	ENSG00000102034;ENSG00000150782
GO:0002645	positive regulation of tolerance induction	2	11	0.0256382628394456	0.148567395556945	ENSG00000129654;ENSG00000186818
GO:0006558	L-phenylalanine metabolic process	2	11	0.0256382628394456	0.148567395556945	ENSG00000104951;ENSG00000162174
GO:0010248	establishment or maintenance of transmembrane electrochemical gradient	2	11	0.0256382628394456	0.148567395556945	ENSG00000069849;ENSG00000175003
GO:0010944	negative regulation of transcription by competitive promoter binding	2	11	0.0256382628394456	0.148567395556945	ENSG00000123095;ENSG00000185499
GO:0032836	glomerular basement membrane development	2	11	0.0256382628394456	0.148567395556945	ENSG00000137573;ENSG00000157483
GO:0033033	negative regulation of myeloid cell apoptotic process	2	11	0.0256382628394456	0.148567395556945	ENSG00000049130;ENSG00000130427
GO:0043589	skin morphogenesis	2	11	0.0256382628394456	0.148567395556945	ENSG00000132470;ENSG00000164171
GO:0051132	NK T cell activation	2	11	0.0256382628394456	0.148567395556945	ENSG00000102034;ENSG00000150782
GO:0055015	ventricular cardiac muscle cell development	2	11	0.0256382628394456	0.148567395556945	ENSG00000134057;ENSG00000170312
GO:0060433	bronchus development	2	11	0.0256382628394456	0.148567395556945	ENSG00000106541;ENSG00000124664
GO:0070601	centromeric sister chromatid cohesion	2	11	0.0256382628394456	0.148567395556945	ENSG00000156970;ENSG00000169679
GO:0072697	protein localization to cell cortex	2	11	0.0256382628394456	0.148567395556945	ENSG00000099812;ENSG00000166851
GO:0086103	G protein-coupled receptor signaling pathway involved in heart process	2	11	0.0256382628394456	0.148567395556945	ENSG00000100604;ENSG00000116741
GO:1902221	erythrose 4-phosphate/phosphoenolpyruvate family amino acid metabolic process	2	11	0.0256382628394456	0.148567395556945	ENSG00000104951;ENSG00000162174
GO:1903862	positive regulation of oxidative phosphorylation	2	11	0.0256382628394456	0.148567395556945	ENSG00000134057;ENSG00000170312
GO:2000647	negative regulation of stem cell proliferation	2	11	0.0256382628394456	0.148567395556945	ENSG00000077942;ENSG00000105894
GO:0006801	superoxide metabolic process	5	72	0.0256836220890488	0.148567395556945	ENSG00000051523;ENSG00000116701;ENSG00000165168;ENSG00000169896;ENSG00000181019
GO:0015807	L-amino acid transport	5	72	0.0256836220890488	0.148567395556945	ENSG00000092068;ENSG00000105281;ENSG00000111371;ENSG00000116741;ENSG00000139514
GO:0048332	mesoderm morphogenesis	5	72	0.0256836220890488	0.148567395556945	ENSG00000005884;ENSG00000054598;ENSG00000107984;ENSG00000132470;ENSG00000164171
GO:1901652	response to peptide	20	537	0.0257819653602722	0.148980426794467	ENSG00000051523;ENSG00000067225;ENSG00000085662;ENSG00000087245;ENSG00000094804;ENSG00000095970;ENSG00000100985;ENSG00000103222;ENSG00000113739;ENSG00000117394;ENSG00000145386;ENSG00000145708;ENSG00000160182;ENSG00000165168;ENSG00000175344;ENSG00000182195;ENSG00000214253;ENSG00000215644;ENSG00000221926;ENSG00000262406
GO:0014850	response to muscle activity	3	28	0.026328592109481	0.15119118833378	ENSG00000133110;ENSG00000164171;ENSG00000214253
GO:0018126	protein hydroxylation	3	28	0.026328592109481	0.15119118833378	ENSG00000110811;ENSG00000129521;ENSG00000141756
GO:0018146	keratan sulfate biosynthetic process	3	28	0.026328592109481	0.15119118833378	ENSG00000122176;ENSG00000156966;ENSG00000175040
GO:0034698	response to gonadotropin	3	28	0.026328592109481	0.15119118833378	ENSG00000005884;ENSG00000136943;ENSG00000145386
GO:0072378	blood coagulation, fibrin clot formation	3	28	0.026328592109481	0.15119118833378	ENSG00000077942;ENSG00000117525;ENSG00000124491
GO:1990776	response to angiotensin	3	28	0.026328592109481	0.15119118833378	ENSG00000051523;ENSG00000094804;ENSG00000165168
GO:0002823	negative regulation of adaptive immune response based on somatic recombination of immune receptors built from immunoglobulin superfamily domains	4	49	0.0265065888594388	0.151583698441258	ENSG00000104951;ENSG00000129654;ENSG00000135077;ENSG00000186818
GO:0014075	response to amine	4	49	0.0265065888594388	0.151583698441258	ENSG00000116741;ENSG00000164171;ENSG00000170312;ENSG00000181019
GO:0031103	axon regeneration	4	49	0.0265065888594388	0.151583698441258	ENSG00000041982;ENSG00000105894;ENSG00000110195;ENSG00000118785
GO:1901862	negative regulation of muscle tissue development	4	49	0.0265065888594388	0.151583698441258	ENSG00000107984;ENSG00000116741;ENSG00000155760;ENSG00000160211
GO:0048583	regulation of response to stimulus	120	4428	0.0268733819779966	0.153522523076778	ENSG00000005448;ENSG00000005884;ENSG00000011422;ENSG00000019505;ENSG00000035499;ENSG00000049130;ENSG00000051180;ENSG00000051523;ENSG00000074800;ENSG00000075461;ENSG00000076716;ENSG00000076864;ENSG00000077782;ENSG00000077942;ENSG00000080293;ENSG00000085662;ENSG00000087494;ENSG00000088325;ENSG00000089685;ENSG00000090104;ENSG00000092445;ENSG00000092929;ENSG00000095970;ENSG00000096088;ENSG00000100604…
GO:0045765	regulation of angiogenesis	13	307	0.0272722070741324	0.155640149762592	ENSG00000054598;ENSG00000067225;ENSG00000102359;ENSG00000105894;ENSG00000117525;ENSG00000137573;ENSG00000143125;ENSG00000157613;ENSG00000159399;ENSG00000165168;ENSG00000169429;ENSG00000175344;ENSG00000176170
GO:0042116	macrophage activation	6	99	0.027544087232322	0.157029693190454	ENSG00000095970;ENSG00000109861;ENSG00000135077;ENSG00000155659;ENSG00000169896;ENSG00000176170
GO:0001944	vasculature development	25	717	0.028064845785999	0.159669338679603	ENSG00000054598;ENSG00000067225;ENSG00000087245;ENSG00000091129;ENSG00000102359;ENSG00000105894;ENSG00000110195;ENSG00000112655;ENSG00000113083;ENSG00000117525;ENSG00000124766;ENSG00000128342;ENSG00000137573;ENSG00000141756;ENSG00000143125;ENSG00000150782;ENSG00000157227;ENSG00000157483;ENSG00000157613;ENSG00000159399;ENSG00000161714;ENSG00000165168;ENSG00000169429;ENSG00000175344;ENSG00000176170
GO:0072358	cardiovascular system development	25	717	0.028064845785999	0.159669338679603	ENSG00000054598;ENSG00000067225;ENSG00000087245;ENSG00000091129;ENSG00000102359;ENSG00000105894;ENSG00000110195;ENSG00000112655;ENSG00000113083;ENSG00000117525;ENSG00000124766;ENSG00000128342;ENSG00000137573;ENSG00000141756;ENSG00000143125;ENSG00000150782;ENSG00000157227;ENSG00000157483;ENSG00000157613;ENSG00000159399;ENSG00000161714;ENSG00000165168;ENSG00000169429;ENSG00000175344;ENSG00000176170
GO:0043067	regulation of programmed cell death	48	1568	0.0281594444329197	0.160042885625947	ENSG00000011422;ENSG00000049130;ENSG00000054598;ENSG00000074800;ENSG00000077782;ENSG00000085662;ENSG00000089685;ENSG00000092445;ENSG00000095970;ENSG00000100985;ENSG00000101057;ENSG00000104419;ENSG00000105894;ENSG00000107984;ENSG00000109846;ENSG00000109861;ENSG00000113083;ENSG00000114346;ENSG00000117525;ENSG00000124664;ENSG00000124766;ENSG00000129521;ENSG00000130427;ENSG00000130829;ENSG00000131747…
GO:0006692	prostanoid metabolic process	4	50	0.0283018797063065	0.160522456180384	ENSG00000085662;ENSG00000148344;ENSG00000164687;ENSG00000167600
GO:0006693	prostaglandin metabolic process	4	50	0.0283018797063065	0.160522456180384	ENSG00000085662;ENSG00000148344;ENSG00000164687;ENSG00000167600
GO:0002696	positive regulation of leukocyte activation	16	407	0.0283807675505817	0.160804963683111	ENSG00000095970;ENSG00000104951;ENSG00000106123;ENSG00000109861;ENSG00000124766;ENSG00000130427;ENSG00000135077;ENSG00000139514;ENSG00000150782;ENSG00000157227;ENSG00000169896;ENSG00000186818;ENSG00000211935;ENSG00000211950;ENSG00000232216;ENSG00000272398
GO:0046031	ADP metabolic process	7	127	0.028468576573183	0.161137388382499	ENSG00000067057;ENSG00000067225;ENSG00000074800;ENSG00000111674;ENSG00000149925;ENSG00000159399;ENSG00000170525
GO:0070663	regulation of leukocyte proliferation	11	246	0.0287532151637742	0.162439881101205	ENSG00000049130;ENSG00000104951;ENSG00000129654;ENSG00000130427;ENSG00000135077;ENSG00000139514;ENSG00000147889;ENSG00000150782;ENSG00000155659;ENSG00000186818;ENSG00000272398
GO:0002507	tolerance induction	3	29	0.0288749372735053	0.162439881101205	ENSG00000129654;ENSG00000135077;ENSG00000186818
GO:0002675	positive regulation of acute inflammatory response	3	29	0.0288749372735053	0.162439881101205	ENSG00000132965;ENSG00000145623;ENSG00000198535
GO:0006972	hyperosmotic response	3	29	0.0288749372735053	0.162439881101205	ENSG00000085662;ENSG00000117394;ENSG00000130427
GO:0033028	myeloid cell apoptotic process	3	29	0.0288749372735053	0.162439881101205	ENSG00000049130;ENSG00000130427;ENSG00000147889
GO:0140058	neuron projection arborization	3	29	0.0288749372735053	0.162439881101205	ENSG00000105894;ENSG00000159217;ENSG00000175344
GO:0001701	in utero embryonic development	15	375	0.0290441070877764	0.163059809335435	ENSG00000054598;ENSG00000101003;ENSG00000112559;ENSG00000113758;ENSG00000117650;ENSG00000128342;ENSG00000134057;ENSG00000141756;ENSG00000153233;ENSG00000157456;ENSG00000157483;ENSG00000157765;ENSG00000161714;ENSG00000171310;ENSG00000171345
GO:0007517	muscle organ development	15	375	0.0290441070877764	0.163059809335435	ENSG00000054598;ENSG00000069011;ENSG00000107984;ENSG00000109846;ENSG00000113083;ENSG00000116741;ENSG00000117724;ENSG00000128342;ENSG00000134057;ENSG00000155760;ENSG00000160211;ENSG00000163359;ENSG00000170312;ENSG00000178860;ENSG00000187957
GO:0051347	positive regulation of transferase activity	24	684	0.0290814440745047	0.16309358427315	ENSG00000046774;ENSG00000049130;ENSG00000077782;ENSG00000088325;ENSG00000092445;ENSG00000094804;ENSG00000107984;ENSG00000114346;ENSG00000117399;ENSG00000117650;ENSG00000130427;ENSG00000130829;ENSG00000134057;ENSG00000135549;ENSG00000143125;ENSG00000147852;ENSG00000150782;ENSG00000166851;ENSG00000168078;ENSG00000175063;ENSG00000175344;ENSG00000178999;ENSG00000204580;ENSG00000272398
GO:0045859	regulation of protein kinase activity	27	791	0.0291091080791318	0.16309358427315	ENSG00000049130;ENSG00000077782;ENSG00000088325;ENSG00000088992;ENSG00000094804;ENSG00000105173;ENSG00000107984;ENSG00000114346;ENSG00000116741;ENSG00000130427;ENSG00000130829;ENSG00000134057;ENSG00000135549;ENSG00000143125;ENSG00000145386;ENSG00000147852;ENSG00000147889;ENSG00000150782;ENSG00000154277;ENSG00000157456;ENSG00000164045;ENSG00000166851;ENSG00000168078;ENSG00000175344;ENSG00000175793…
GO:0008544	epidermis development	18	476	0.0292753131457566	0.163858787141735	ENSG00000006611;ENSG00000046604;ENSG00000054598;ENSG00000058085;ENSG00000087494;ENSG00000114113;ENSG00000124102;ENSG00000128422;ENSG00000136943;ENSG00000143320;ENSG00000164379;ENSG00000164687;ENSG00000167767;ENSG00000171345;ENSG00000175793;ENSG00000175832;ENSG00000179593;ENSG00000221926
GO:0007127	meiosis I	7	128	0.0295409298655819	0.165080173210887	ENSG00000051180;ENSG00000071539;ENSG00000105173;ENSG00000131747;ENSG00000157456;ENSG00000164611;ENSG00000166851
GO:0042742	defense response to bacterium	14	343	0.0295532317321479	0.165080173210887	ENSG00000051523;ENSG00000095970;ENSG00000096088;ENSG00000100604;ENSG00000101443;ENSG00000124102;ENSG00000135077;ENSG00000143546;ENSG00000158869;ENSG00000163220;ENSG00000174992;ENSG00000211935;ENSG00000211950;ENSG00000232216
GO:0001568	blood vessel development	24	686	0.029948366294125	0.166878363078396	ENSG00000054598;ENSG00000067225;ENSG00000087245;ENSG00000091129;ENSG00000102359;ENSG00000105894;ENSG00000110195;ENSG00000112655;ENSG00000113083;ENSG00000117525;ENSG00000124766;ENSG00000137573;ENSG00000141756;ENSG00000143125;ENSG00000150782;ENSG00000157227;ENSG00000157483;ENSG00000157613;ENSG00000159399;ENSG00000161714;ENSG00000165168;ENSG00000169429;ENSG00000175344;ENSG00000176170
GO:0015909	long-chain fatty acid transport	5	75	0.0299737006489105	0.166878363078396	ENSG00000083807;ENSG00000117394;ENSG00000151365;ENSG00000164687;ENSG00000197696
GO:0030593	neutrophil chemotaxis	6	101	0.029995857667256	0.166878363078396	ENSG00000143546;ENSG00000158869;ENSG00000163220;ENSG00000163735;ENSG00000163739;ENSG00000169429
GO:1901570	fatty acid derivative biosynthetic process	6	101	0.029995857667256	0.166878363078396	ENSG00000083807;ENSG00000132965;ENSG00000148344;ENSG00000164181;ENSG00000164687;ENSG00000179593
GO:0014009	glial cell proliferation	4	51	0.0301678296720313	0.167666430237521	ENSG00000095970;ENSG00000105894;ENSG00000124766;ENSG00000244405
GO:0006002	fructose 6-phosphate metabolic process	2	12	0.0303012967783788	0.167733905089524	ENSG00000067057;ENSG00000159399
GO:0030311	poly-N-acetyllactosamine biosynthetic process	2	12	0.0303012967783788	0.167733905089524	ENSG00000156966;ENSG00000237172
GO:0031581	hemidesmosome assembly	2	12	0.0303012967783788	0.167733905089524	ENSG00000058085;ENSG00000132470
GO:0060453	regulation of gastric acid secretion	2	12	0.0303012967783788	0.167733905089524	ENSG00000053918;ENSG00000160181
GO:0009168	purine ribonucleoside monophosphate biosynthetic process	9	187	0.0304803839033163	0.168556522985339	ENSG00000067057;ENSG00000067225;ENSG00000074800;ENSG00000095970;ENSG00000106348;ENSG00000111674;ENSG00000149925;ENSG00000159399;ENSG00000170525
GO:0033554	cellular response to stress	62	2118	0.0306892542292598	0.169542033853953	ENSG00000041982;ENSG00000051180;ENSG00000051523;ENSG00000071539;ENSG00000074800;ENSG00000075218;ENSG00000085491;ENSG00000085662;ENSG00000087245;ENSG00000093009;ENSG00000100985;ENSG00000104419;ENSG00000105894;ENSG00000106541;ENSG00000107159;ENSG00000107984;ENSG00000109846;ENSG00000110195;ENSG00000111206;ENSG00000113739;ENSG00000114346;ENSG00000116701;ENSG00000117394;ENSG00000118785;ENSG00000124766…
GO:0045862	positive regulation of proteolysis	15	378	0.0308504274332783	0.170262339027973	ENSG00000005001;ENSG00000074800;ENSG00000077942;ENSG00000095970;ENSG00000109861;ENSG00000117399;ENSG00000117525;ENSG00000129521;ENSG00000143546;ENSG00000147889;ENSG00000153071;ENSG00000157227;ENSG00000163220;ENSG00000166851;ENSG00000214253
GO:0009127	purine nucleoside monophosphate biosynthetic process	9	188	0.0313873872773963	0.172898312011887	ENSG00000067057;ENSG00000067225;ENSG00000074800;ENSG00000095970;ENSG00000106348;ENSG00000111674;ENSG00000149925;ENSG00000159399;ENSG00000170525
GO:0070848	response to growth factor	25	725	0.0314621647790642	0.172898312011887	ENSG00000005884;ENSG00000041982;ENSG00000054598;ENSG00000076864;ENSG00000077782;ENSG00000104435;ENSG00000105894;ENSG00000110195;ENSG00000113083;ENSG00000120057;ENSG00000122176;ENSG00000124225;ENSG00000133110;ENSG00000137573;ENSG00000145386;ENSG00000153071;ENSG00000157613;ENSG00000158747;ENSG00000168743;ENSG00000169429;ENSG00000170801;ENSG00000171241;ENSG00000171310;ENSG00000176170;ENSG00000206557
GO:0014909	smooth muscle cell migration	5	76	0.031497919199984	0.172898312011887	ENSG00000122861;ENSG00000133110;ENSG00000163191;ENSG00000164171;ENSG00000204580
GO:0036151	phosphatidylcholine acyl-chain remodeling	3	30	0.0315469072007223	0.172898312011887	ENSG00000121316;ENSG00000153395;ENSG00000176454
GO:0045987	positive regulation of smooth muscle contraction	3	30	0.0315469072007223	0.172898312011887	ENSG00000164171;ENSG00000168743;ENSG00000176170
GO:0071480	cellular response to gamma radiation	3	30	0.0315469072007223	0.172898312011887	ENSG00000051180;ENSG00000051523;ENSG00000109846
GO:1902751	positive regulation of cell cycle G2/M phase transition	3	30	0.0315469072007223	0.172898312011887	ENSG00000134057;ENSG00000164045;ENSG00000170312
GO:0002526	acute inflammatory response	10	219	0.0318926255665081	0.174620019190881	ENSG00000106123;ENSG00000117525;ENSG00000130427;ENSG00000132965;ENSG00000143546;ENSG00000145623;ENSG00000148344;ENSG00000155659;ENSG00000163687;ENSG00000198535
GO:0030203	glycosaminoglycan metabolic process	8	159	0.0320263436283819	0.175178714406481	ENSG00000038427;ENSG00000054598;ENSG00000076716;ENSG00000122176;ENSG00000123243;ENSG00000156966;ENSG00000171310;ENSG00000175040
GO:0034097	response to cytokine	38	1203	0.0320997725767308	0.175406860028974	ENSG00000051523;ENSG00000054598;ENSG00000067057;ENSG00000075618;ENSG00000087245;ENSG00000089685;ENSG00000095970;ENSG00000100985;ENSG00000101057;ENSG00000102007;ENSG00000113083;ENSG00000117525;ENSG00000124491;ENSG00000128342;ENSG00000130427;ENSG00000133110;ENSG00000145623;ENSG00000145708;ENSG00000148344;ENSG00000150782;ENSG00000158869;ENSG00000159399;ENSG00000160181;ENSG00000163735;ENSG00000163739…
GO:0001906	cell killing	9	189	0.0323130089200468	0.176397768339446	ENSG00000051523;ENSG00000092929;ENSG00000100604;ENSG00000109861;ENSG00000135077;ENSG00000150782;ENSG00000155760;ENSG00000163687;ENSG00000169896
GO:0006793	phosphorus metabolic process	95	3439	0.0324816153368678	0.177143326245443	ENSG00000005421;ENSG00000005448;ENSG00000011422;ENSG00000049130;ENSG00000051180;ENSG00000054179;ENSG00000067057;ENSG00000067225;ENSG00000070087;ENSG00000074800;ENSG00000077782;ENSG00000077942;ENSG00000087494;ENSG00000088325;ENSG00000088992;ENSG00000089685;ENSG00000092445;ENSG00000094804;ENSG00000095970;ENSG00000100985;ENSG00000102359;ENSG00000105173;ENSG00000105894;ENSG00000106123;ENSG00000106348…
GO:0051153	regulation of striated muscle cell differentiation	6	103	0.0325864972378948	0.177444459282253	ENSG00000107984;ENSG00000116741;ENSG00000123095;ENSG00000155760;ENSG00000157227;ENSG00000160211
GO:0019318	hexose metabolic process	11	251	0.0326010073473362	0.177444459282253	ENSG00000067057;ENSG00000067225;ENSG00000074800;ENSG00000085662;ENSG00000111674;ENSG00000149925;ENSG00000159399;ENSG00000160211;ENSG00000164687;ENSG00000170525;ENSG00000215644
GO:0007163	establishment or maintenance of cell polarity	10	220	0.0327529311442538	0.178096075936798	ENSG00000075618;ENSG00000080986;ENSG00000099812;ENSG00000112655;ENSG00000115163;ENSG00000120057;ENSG00000129654;ENSG00000142945;ENSG00000164109;ENSG00000166851
GO:0019221	cytokine-mediated signaling pathway	27	800	0.0328627371694226	0.178481141424391	ENSG00000054598;ENSG00000075618;ENSG00000087245;ENSG00000089685;ENSG00000095970;ENSG00000100985;ENSG00000102007;ENSG00000117525;ENSG00000124491;ENSG00000128342;ENSG00000130427;ENSG00000145623;ENSG00000150782;ENSG00000158869;ENSG00000160181;ENSG00000163735;ENSG00000163739;ENSG00000164761;ENSG00000169429;ENSG00000169896;ENSG00000176170;ENSG00000185499;ENSG00000186818;ENSG00000196611;ENSG00000232629…
GO:1903038	negative regulation of leukocyte cell-cell adhesion	7	131	0.0329205721976272	0.178481141424391	ENSG00000104951;ENSG00000129654;ENSG00000135077;ENSG00000147889;ENSG00000151882;ENSG00000155659;ENSG00000186818
GO:1905477	positive regulation of protein localization to membrane	7	131	0.0329205721976272	0.178481141424391	ENSG00000005884;ENSG00000095970;ENSG00000105894;ENSG00000106541;ENSG00000169896;ENSG00000175793;ENSG00000214253
GO:0071695	anatomical structure maturation	8	160	0.0330608012171798	0.179065847924588	ENSG00000071539;ENSG00000085662;ENSG00000087245;ENSG00000091129;ENSG00000130427;ENSG00000134057;ENSG00000160211;ENSG00000178882
GO:1901214	regulation of neuron death	13	316	0.0333204174399069	0.180295409435113	ENSG00000089685;ENSG00000092445;ENSG00000100604;ENSG00000101057;ENSG00000107984;ENSG00000129521;ENSG00000130427;ENSG00000160211;ENSG00000164379;ENSG00000169896;ENSG00000175344;ENSG00000181019;ENSG00000214253
GO:0006468	protein phosphorylation	59	2012	0.0336746053948156	0.182033790648416	ENSG00000005448;ENSG00000011422;ENSG00000049130;ENSG00000051180;ENSG00000070087;ENSG00000077782;ENSG00000077942;ENSG00000088325;ENSG00000088992;ENSG00000089685;ENSG00000092445;ENSG00000094804;ENSG00000095970;ENSG00000100985;ENSG00000105173;ENSG00000106123;ENSG00000107984;ENSG00000109846;ENSG00000111206;ENSG00000112655;ENSG00000112742;ENSG00000113083;ENSG00000114346;ENSG00000116741;ENSG00000117650…
GO:0014070	response to organic cyclic compound	31	948	0.0338365507068394	0.182730591219553	ENSG00000041982;ENSG00000051180;ENSG00000051523;ENSG00000053918;ENSG00000075461;ENSG00000105894;ENSG00000107159;ENSG00000109846;ENSG00000110195;ENSG00000113083;ENSG00000113739;ENSG00000118785;ENSG00000124225;ENSG00000130427;ENSG00000133110;ENSG00000134057;ENSG00000136943;ENSG00000140505;ENSG00000145386;ENSG00000145708;ENSG00000148344;ENSG00000150782;ENSG00000153071;ENSG00000157227;ENSG00000160211…
GO:0098754	detoxification	7	132	0.0341021054063714	0.183985017460716	ENSG00000132965;ENSG00000148344;ENSG00000163220;ENSG00000164294;ENSG00000169715;ENSG00000181019;ENSG00000187193
GO:0097305	response to alcohol	11	253	0.0342379741679202	0.184210629271241	ENSG00000041982;ENSG00000051180;ENSG00000051523;ENSG00000116741;ENSG00000130649;ENSG00000143546;ENSG00000145708;ENSG00000160211;ENSG00000165168;ENSG00000170312;ENSG00000181019
GO:0010039	response to iron ion	3	31	0.0343437900142223	0.184210629271241	ENSG00000134057;ENSG00000160182;ENSG00000160211
GO:0010453	regulation of cell fate commitment	3	31	0.0343437900142223	0.184210629271241	ENSG00000107984;ENSG00000124664;ENSG00000155760
GO:0120033	negative regulation of plasma membrane bounded cell projection assembly	3	31	0.0343437900142223	0.184210629271241	ENSG00000070087;ENSG00000076864;ENSG00000184292
GO:1900027	regulation of ruffle assembly	3	31	0.0343437900142223	0.184210629271241	ENSG00000070087;ENSG00000184292;ENSG00000198758
GO:1903319	positive regulation of protein maturation	3	31	0.0343437900142223	0.184210629271241	ENSG00000074800;ENSG00000124766;ENSG00000157227
GO:0031349	positive regulation of defense response	19	520	0.0345542468167119	0.18487970740354	ENSG00000051523;ENSG00000092445;ENSG00000095970;ENSG00000096088;ENSG00000103222;ENSG00000109861;ENSG00000132965;ENSG00000135077;ENSG00000143546;ENSG00000145623;ENSG00000146070;ENSG00000150782;ENSG00000158869;ENSG00000163220;ENSG00000164171;ENSG00000169896;ENSG00000185499;ENSG00000198535;ENSG00000262406
GO:0003006	developmental process involved in reproduction	24	696	0.0345813309075274	0.18487970740354	ENSG00000041982;ENSG00000049130;ENSG00000054598;ENSG00000071539;ENSG00000088992;ENSG00000092445;ENSG00000105894;ENSG00000112559;ENSG00000113739;ENSG00000118785;ENSG00000122133;ENSG00000128342;ENSG00000134057;ENSG00000136943;ENSG00000137573;ENSG00000137819;ENSG00000145685;ENSG00000154040;ENSG00000157227;ENSG00000161714;ENSG00000171345;ENSG00000173894;ENSG00000179593;ENSG00000244405
GO:0071363	cellular response to growth factor stimulus	24	697	0.0350727219704099	0.18487970740354	ENSG00000005884;ENSG00000054598;ENSG00000076864;ENSG00000077782;ENSG00000104435;ENSG00000105894;ENSG00000110195;ENSG00000113083;ENSG00000120057;ENSG00000122176;ENSG00000124225;ENSG00000133110;ENSG00000137573;ENSG00000145386;ENSG00000153071;ENSG00000157613;ENSG00000158747;ENSG00000168743;ENSG00000169429;ENSG00000170801;ENSG00000171241;ENSG00000171310;ENSG00000176170;ENSG00000206557
GO:0009132	nucleoside diphosphate metabolic process	8	162	0.0351975002121964	0.18487970740354	ENSG00000054179;ENSG00000067057;ENSG00000067225;ENSG00000074800;ENSG00000111674;ENSG00000149925;ENSG00000159399;ENSG00000170525
GO:0034614	cellular response to reactive oxygen species	8	162	0.0351975002121964	0.18487970740354	ENSG00000087245;ENSG00000100985;ENSG00000114346;ENSG00000145386;ENSG00000170312;ENSG00000176170;ENSG00000181019;ENSG00000183010
GO:0009142	nucleoside triphosphate biosynthetic process	9	192	0.035203155229995	0.18487970740354	ENSG00000067057;ENSG00000067225;ENSG00000074800;ENSG00000095970;ENSG00000106348;ENSG00000111674;ENSG00000149925;ENSG00000159399;ENSG00000170525
GO:0006570	tyrosine metabolic process	2	13	0.0352709025878363	0.18487970740354	ENSG00000104951;ENSG00000172425
GO:0010623	programmed cell death involved in cell development	2	13	0.0352709025878363	0.18487970740354	ENSG00000049130;ENSG00000163687
GO:0015697	quaternary ammonium group transport	2	13	0.0352709025878363	0.18487970740354	ENSG00000140107;ENSG00000175003
GO:0015801	aromatic amino acid transport	2	13	0.0352709025878363	0.18487970740354	ENSG00000092068;ENSG00000139514
GO:0015816	glycine transport	2	13	0.0352709025878363	0.18487970740354	ENSG00000092068;ENSG00000116741
GO:0030309	poly-N-acetyllactosamine metabolic process	2	13	0.0352709025878363	0.18487970740354	ENSG00000156966;ENSG00000237172
GO:0031507	heterochromatin assembly	2	13	0.0352709025878363	0.18487970740354	ENSG00000137309;ENSG00000147889
GO:0035358	regulation of peroxisome proliferator activated receptor signaling pathway	2	13	0.0352709025878363	0.18487970740354	ENSG00000164687;ENSG00000179593
GO:0043129	surfactant homeostasis	2	13	0.0352709025878363	0.18487970740354	ENSG00000153395;ENSG00000167972
GO:0060100	positive regulation of phagocytosis, engulfment	2	13	0.0352709025878363	0.18487970740354	ENSG00000095970;ENSG00000164171
GO:0060394	negative regulation of pathway-restricted SMAD protein phosphorylation	2	13	0.0352709025878363	0.18487970740354	ENSG00000107984;ENSG00000124225
GO:0060707	trophoblast giant cell differentiation	2	13	0.0352709025878363	0.18487970740354	ENSG00000112559;ENSG00000128342
GO:0070254	mucus secretion	2	13	0.0352709025878363	0.18487970740354	ENSG00000051523;ENSG00000106541
GO:0070486	leukocyte aggregation	2	13	0.0352709025878363	0.18487970740354	ENSG00000143546;ENSG00000163220
GO:0072310	glomerular epithelial cell development	2	13	0.0352709025878363	0.18487970740354	ENSG00000129654;ENSG00000157483
GO:0090177	establishment of planar polarity involved in neural tube closure	2	13	0.0352709025878363	0.18487970740354	ENSG00000112655;ENSG00000164932
GO:1904667	negative regulation of ubiquitin protein ligase activity	2	13	0.0352709025878363	0.18487970740354	ENSG00000147889;ENSG00000164109
GO:1905155	positive regulation of membrane invagination	2	13	0.0352709025878363	0.18487970740354	ENSG00000095970;ENSG00000164171
GO:0044773	mitotic DNA damage checkpoint	6	105	0.035318329228049	0.184952993021885	ENSG00000075218;ENSG00000124766;ENSG00000134057;ENSG00000170312;ENSG00000175793;ENSG00000185499
GO:0006796	phosphate-containing compound metabolic process	94	3412	0.0355219871465236	0.185843508912276	ENSG00000005421;ENSG00000005448;ENSG00000011422;ENSG00000049130;ENSG00000051180;ENSG00000054179;ENSG00000067057;ENSG00000067225;ENSG00000070087;ENSG00000074800;ENSG00000077782;ENSG00000077942;ENSG00000087494;ENSG00000088325;ENSG00000088992;ENSG00000089685;ENSG00000092445;ENSG00000094804;ENSG00000095970;ENSG00000100985;ENSG00000102359;ENSG00000105173;ENSG00000105894;ENSG00000106123;ENSG00000106348…
GO:1901615	organic hydroxy compound metabolic process	20	557	0.0358093159352731	0.187169675918771	ENSG00000005421;ENSG00000083807;ENSG00000085662;ENSG00000106258;ENSG00000130649;ENSG00000139547;ENSG00000140274;ENSG00000140505;ENSG00000141934;ENSG00000147852;ENSG00000160211;ENSG00000160868;ENSG00000161714;ENSG00000163082;ENSG00000166391;ENSG00000169896;ENSG00000176170;ENSG00000179593;ENSG00000185664;ENSG00000227471
GO:1902105	regulation of leukocyte differentiation	12	287	0.0359197817760159	0.187469815234694	ENSG00000049130;ENSG00000088992;ENSG00000095970;ENSG00000104951;ENSG00000124766;ENSG00000128342;ENSG00000129654;ENSG00000147889;ENSG00000150782;ENSG00000157227;ENSG00000186818;ENSG00000204252
GO:0060341	regulation of cellular localization	31	953	0.0359345396290733	0.187469815234694	ENSG00000005884;ENSG00000051523;ENSG00000070087;ENSG00000075218;ENSG00000076716;ENSG00000080986;ENSG00000089685;ENSG00000092929;ENSG00000095970;ENSG00000099812;ENSG00000105173;ENSG00000105894;ENSG00000106541;ENSG00000109846;ENSG00000113758;ENSG00000114346;ENSG00000128342;ENSG00000130427;ENSG00000145920;ENSG00000146670;ENSG00000147889;ENSG00000153071;ENSG00000157227;ENSG00000166851;ENSG00000167513…
GO:0002820	negative regulation of adaptive immune response	4	54	0.0361928370453569	0.188461759755954	ENSG00000104951;ENSG00000129654;ENSG00000135077;ENSG00000186818
GO:0008347	glial cell migration	4	54	0.0361928370453569	0.188461759755954	ENSG00000038427;ENSG00000091136;ENSG00000095970;ENSG00000157227
GO:0050867	positive regulation of cell activation	16	420	0.0362689671298607	0.188611729729699	ENSG00000095970;ENSG00000104951;ENSG00000106123;ENSG00000109861;ENSG00000124766;ENSG00000130427;ENSG00000135077;ENSG00000139514;ENSG00000150782;ENSG00000157227;ENSG00000169896;ENSG00000186818;ENSG00000211935;ENSG00000211950;ENSG00000232216;ENSG00000272398
GO:0006937	regulation of muscle contraction	8	163	0.0363001015756672	0.188611729729699	ENSG00000046604;ENSG00000053918;ENSG00000074800;ENSG00000100604;ENSG00000116741;ENSG00000164171;ENSG00000168743;ENSG00000176170
GO:0048708	astrocyte differentiation	5	79	0.0363580658032295	0.188611729729699	ENSG00000095970;ENSG00000128342;ENSG00000143546;ENSG00000163220;ENSG00000182240
GO:0055017	cardiac muscle tissue growth	5	79	0.0363580658032295	0.188611729729699	ENSG00000054598;ENSG00000116741;ENSG00000134057;ENSG00000160211;ENSG00000170312
GO:0099024	plasma membrane invagination	7	134	0.0365489889371488	0.189424469374351	ENSG00000095970;ENSG00000164171;ENSG00000169896;ENSG00000178999;ENSG00000211935;ENSG00000211950;ENSG00000232216
GO:0010976	positive regulation of neuron projection development	12	288	0.0367335776792139	0.190202888170461	ENSG00000005884;ENSG00000104435;ENSG00000105894;ENSG00000112655;ENSG00000113758;ENSG00000116741;ENSG00000130427;ENSG00000137285;ENSG00000143320;ENSG00000147852;ENSG00000163220;ENSG00000187688
GO:0015695	organic cation transport	3	32	0.0372646912274052	0.192772443861132	ENSG00000092068;ENSG00000140107;ENSG00000175003
GO:0006633	fatty acid biosynthetic process	8	164	0.0374257686835824	0.193244165098236	ENSG00000130649;ENSG00000132965;ENSG00000140505;ENSG00000148344;ENSG00000160868;ENSG00000164181;ENSG00000164687;ENSG00000179593
GO:0006754	ATP biosynthetic process	8	164	0.0374257686835824	0.193244165098236	ENSG00000067057;ENSG00000067225;ENSG00000074800;ENSG00000095970;ENSG00000111674;ENSG00000149925;ENSG00000159399;ENSG00000170525
GO:0051346	negative regulation of hydrolase activity	17	456	0.0375344934549932	0.193577568999269	ENSG00000011422;ENSG00000089685;ENSG00000100985;ENSG00000101443;ENSG00000105894;ENSG00000109846;ENSG00000116741;ENSG00000118849;ENSG00000123243;ENSG00000124102;ENSG00000163359;ENSG00000164611;ENSG00000166143;ENSG00000171199;ENSG00000175793;ENSG00000221867;ENSG00000225968
GO:0072331	signal transduction by p53 class mediator	12	289	0.0375603492832217	0.193577568999269	ENSG00000075218;ENSG00000088325;ENSG00000104419;ENSG00000111206;ENSG00000124766;ENSG00000134057;ENSG00000147889;ENSG00000170312;ENSG00000174371;ENSG00000175793;ENSG00000178999;ENSG00000185499
GO:0006165	nucleoside diphosphate phosphorylation	7	135	0.0378147558970531	0.194526139637864	ENSG00000067057;ENSG00000067225;ENSG00000074800;ENSG00000111674;ENSG00000149925;ENSG00000159399;ENSG00000170525
GO:0071482	cellular response to light stimulus	7	135	0.0378147558970531	0.194526139637864	ENSG00000087245;ENSG00000100985;ENSG00000105894;ENSG00000164045;ENSG00000168078;ENSG00000178999;ENSG00000196611
GO:0007492	endoderm development	5	80	0.038074922390804	0.195682454294746	ENSG00000087245;ENSG00000091136;ENSG00000100985;ENSG00000107984;ENSG00000157227
GO:0006024	glycosaminoglycan biosynthetic process	6	107	0.0381934431124939	0.196109322573901	ENSG00000038427;ENSG00000076716;ENSG00000122176;ENSG00000156966;ENSG00000171310;ENSG00000175040
GO:0030595	leukocyte chemotaxis	10	226	0.0382587788142753	0.196262566644659	ENSG00000100604;ENSG00000105894;ENSG00000143546;ENSG00000146070;ENSG00000158747;ENSG00000158869;ENSG00000163220;ENSG00000163735;ENSG00000163739;ENSG00000169429
GO:0002704	negative regulation of leukocyte mediated immunity	4	55	0.038344290673121	0.196518931809415	ENSG00000104951;ENSG00000129654;ENSG00000135077;ENSG00000186818
GO:0009887	animal organ morphogenesis	34	1071	0.0388664794132042	0.199010769587981	ENSG00000006611;ENSG00000007062;ENSG00000041982;ENSG00000054598;ENSG00000058085;ENSG00000076716;ENSG00000077782;ENSG00000087245;ENSG00000091136;ENSG00000105894;ENSG00000107984;ENSG00000110195;ENSG00000112559;ENSG00000112655;ENSG00000117122;ENSG00000124766;ENSG00000128342;ENSG00000129654;ENSG00000132470;ENSG00000137573;ENSG00000140297;ENSG00000153071;ENSG00000155760;ENSG00000157227;ENSG00000158747…
GO:0031344	regulation of cell projection organization	24	705	0.0391947323948348	0.200434056787221	ENSG00000005884;ENSG00000006611;ENSG00000011426;ENSG00000070087;ENSG00000075618;ENSG00000076864;ENSG00000091129;ENSG00000095970;ENSG00000104435;ENSG00000105894;ENSG00000112655;ENSG00000113758;ENSG00000116741;ENSG00000117399;ENSG00000118785;ENSG00000130427;ENSG00000137285;ENSG00000143320;ENSG00000147852;ENSG00000163220;ENSG00000164171;ENSG00000184292;ENSG00000187688;ENSG00000198758
GO:0050670	regulation of lymphocyte proliferation	10	227	0.039234916091315	0.200434056787221	ENSG00000104951;ENSG00000129654;ENSG00000130427;ENSG00000135077;ENSG00000139514;ENSG00000147889;ENSG00000150782;ENSG00000155659;ENSG00000186818;ENSG00000272398
GO:0046651	lymphocyte proliferation	12	291	0.0392531796565208	0.200434056787221	ENSG00000102034;ENSG00000104951;ENSG00000106123;ENSG00000129654;ENSG00000130427;ENSG00000135077;ENSG00000139514;ENSG00000147889;ENSG00000150782;ENSG00000155659;ENSG00000186818;ENSG00000272398
GO:0055007	cardiac muscle cell differentiation	6	108	0.0396853187393903	0.202453701687111	ENSG00000107984;ENSG00000116741;ENSG00000134057;ENSG00000155760;ENSG00000160211;ENSG00000170312
GO:0048145	regulation of fibroblast proliferation	5	81	0.0398405993266392	0.202469179567918	ENSG00000077942;ENSG00000094804;ENSG00000134057;ENSG00000145386;ENSG00000176170
GO:0061844	antimicrobial humoral immune response mediated by antimicrobial peptide	5	81	0.0398405993266392	0.202469179567918	ENSG00000096088;ENSG00000163220;ENSG00000163735;ENSG00000163739;ENSG00000169429
GO:0042339	keratan sulfate metabolic process	3	33	0.0403085459281269	0.202469179567918	ENSG00000122176;ENSG00000156966;ENSG00000175040
GO:0051642	centrosome localization	3	33	0.0403085459281269	0.202469179567918	ENSG00000099812;ENSG00000126787;ENSG00000164109
GO:0007179	transforming growth factor beta receptor signaling pathway	9	197	0.0404065874139546	0.202469179567918	ENSG00000005884;ENSG00000110195;ENSG00000113083;ENSG00000122176;ENSG00000124225;ENSG00000153071;ENSG00000168743;ENSG00000170801;ENSG00000171310
GO:0019751	polyol metabolic process	7	137	0.040431917006751	0.202469179567918	ENSG00000085662;ENSG00000141934;ENSG00000160868;ENSG00000161714;ENSG00000163082;ENSG00000166391;ENSG00000176170
GO:0044344	cellular response to fibroblast growth factor stimulus	7	137	0.040431917006751	0.202469179567918	ENSG00000077782;ENSG00000133110;ENSG00000137573;ENSG00000157613;ENSG00000169429;ENSG00000171241;ENSG00000206557
GO:0046939	nucleotide phosphorylation	7	137	0.040431917006751	0.202469179567918	ENSG00000067057;ENSG00000067225;ENSG00000074800;ENSG00000111674;ENSG00000149925;ENSG00000159399;ENSG00000170525
GO:0002684	positive regulation of immune system process	38	1225	0.0405086707070973	0.202469179567918	ENSG00000049130;ENSG00000051523;ENSG00000054598;ENSG00000088992;ENSG00000092445;ENSG00000092929;ENSG00000095970;ENSG00000096088;ENSG00000104951;ENSG00000105894;ENSG00000106123;ENSG00000109861;ENSG00000124766;ENSG00000128342;ENSG00000129654;ENSG00000130427;ENSG00000135077;ENSG00000139514;ENSG00000143226;ENSG00000143546;ENSG00000146070;ENSG00000150782;ENSG00000155659;ENSG00000157227;ENSG00000158869…
GO:0002467	germinal center formation	2	14	0.0405304487851149	0.202469179567918	ENSG00000092929;ENSG00000129654
GO:0007100	mitotic centrosome separation	2	14	0.0405304487851149	0.202469179567918	ENSG00000117650;ENSG00000138160
GO:0010273	detoxification of copper ion	2	14	0.0405304487851149	0.202469179567918	ENSG00000169715;ENSG00000187193
GO:0017014	protein nitrosylation	2	14	0.0405304487851149	0.202469179567918	ENSG00000143546;ENSG00000163220
GO:0018119	peptidyl-cysteine S-nitrosylation	2	14	0.0405304487851149	0.202469179567918	ENSG00000143546;ENSG00000163220
GO:0032725	positive regulation of granulocyte macrophage colony-stimulating factor production	2	14	0.0405304487851149	0.202469179567918	ENSG00000122133;ENSG00000150782
GO:0042659	regulation of cell fate specification	2	14	0.0405304487851149	0.202469179567918	ENSG00000107984;ENSG00000155760
GO:0043249	erythrocyte maturation	2	14	0.0405304487851149	0.202469179567918	ENSG00000130427;ENSG00000160211
GO:0045842	positive regulation of mitotic metaphase/anaphase transition	2	14	0.0405304487851149	0.202469179567918	ENSG00000126787;ENSG00000167513
GO:0061469	regulation of type B pancreatic cell proliferation	2	14	0.0405304487851149	0.202469179567918	ENSG00000089685;ENSG00000163082
GO:1901970	positive regulation of mitotic sister chromatid separation	2	14	0.0405304487851149	0.202469179567918	ENSG00000126787;ENSG00000167513
GO:1905906	regulation of amyloid fibril formation	2	14	0.0405304487851149	0.202469179567918	ENSG00000109846;ENSG00000175344
GO:1990169	stress response to copper ion	2	14	0.0405304487851149	0.202469179567918	ENSG00000169715;ENSG00000187193
GO:2000774	positive regulation of cellular senescence	2	14	0.0405304487851149	0.202469179567918	ENSG00000137309;ENSG00000147889
GO:0001504	neurotransmitter uptake	4	56	0.0405675057361108	0.202471395957304	ENSG00000105281;ENSG00000111371;ENSG00000116741;ENSG00000175003
GO:0008202	steroid metabolic process	13	326	0.0411127757057814	0.203949882802821	ENSG00000005421;ENSG00000021461;ENSG00000083807;ENSG00000085662;ENSG00000106258;ENSG00000118785;ENSG00000130649;ENSG00000139547;ENSG00000140505;ENSG00000147852;ENSG00000160211;ENSG00000160868;ENSG00000227471
GO:1903037	regulation of leukocyte cell-cell adhesion	13	326	0.0411127757057814	0.203949882802821	ENSG00000104951;ENSG00000106123;ENSG00000124766;ENSG00000129654;ENSG00000130427;ENSG00000135077;ENSG00000139514;ENSG00000147889;ENSG00000150782;ENSG00000151882;ENSG00000155659;ENSG00000186818;ENSG00000272398
GO:0000302	response to reactive oxygen species	10	229	0.0412383922627276	0.203949882802821	ENSG00000087245;ENSG00000100985;ENSG00000109846;ENSG00000114346;ENSG00000130649;ENSG00000145386;ENSG00000170312;ENSG00000176170;ENSG00000181019;ENSG00000183010
GO:0032944	regulation of mononuclear cell proliferation	10	229	0.0412383922627276	0.203949882802821	ENSG00000104951;ENSG00000129654;ENSG00000130427;ENSG00000135077;ENSG00000139514;ENSG00000147889;ENSG00000150782;ENSG00000155659;ENSG00000186818;ENSG00000272398
GO:0048144	fibroblast proliferation	5	82	0.0416553032971463	0.203949882802821	ENSG00000077942;ENSG00000094804;ENSG00000134057;ENSG00000145386;ENSG00000176170
GO:0035051	cardiocyte differentiation	7	138	0.0417836755286637	0.203949882802821	ENSG00000107984;ENSG00000110195;ENSG00000116741;ENSG00000134057;ENSG00000155760;ENSG00000160211;ENSG00000170312
GO:0061337	cardiac conduction	7	138	0.0417836755286637	0.203949882802821	ENSG00000046604;ENSG00000053918;ENSG00000069849;ENSG00000075461;ENSG00000089356;ENSG00000096433;ENSG00000137731
GO:0032943	mononuclear cell proliferation	12	294	0.0418919559502225	0.203949882802821	ENSG00000102034;ENSG00000104951;ENSG00000106123;ENSG00000129654;ENSG00000130427;ENSG00000135077;ENSG00000139514;ENSG00000147889;ENSG00000150782;ENSG00000155659;ENSG00000186818;ENSG00000272398
GO:0007267	cell-cell signaling	50	1688	0.0419856027332477	0.203949882802821	ENSG00000005884;ENSG00000035499;ENSG00000041982;ENSG00000053918;ENSG00000070087;ENSG00000075461;ENSG00000076716;ENSG00000080293;ENSG00000087494;ENSG00000089685;ENSG00000096433;ENSG00000100604;ENSG00000105173;ENSG00000105894;ENSG00000106236;ENSG00000107984;ENSG00000110195;ENSG00000112559;ENSG00000112655;ENSG00000113758;ENSG00000117394;ENSG00000117399;ENSG00000118785;ENSG00000120057;ENSG00000122870…
GO:0060071	Wnt signaling pathway, planar cell polarity pathway	6	110	0.0427787516666819	0.203949882802821	ENSG00000076716;ENSG00000107984;ENSG00000112655;ENSG00000153071;ENSG00000155760;ENSG00000164932
GO:0031102	neuron projection regeneration	4	57	0.0428625084106624	0.203949882802821	ENSG00000041982;ENSG00000105894;ENSG00000110195;ENSG00000118785
GO:0032781	positive regulation of ATPase activity	4	57	0.0428625084106624	0.203949882802821	ENSG00000069849;ENSG00000070087;ENSG00000121152;ENSG00000137731
GO:0043525	positive regulation of neuron apoptotic process	4	57	0.0428625084106624	0.203949882802821	ENSG00000101057;ENSG00000169896;ENSG00000181019;ENSG00000214253
GO:0046456	icosanoid biosynthetic process	4	57	0.0428625084106624	0.203949882802821	ENSG00000132965;ENSG00000148344;ENSG00000164687;ENSG00000179593
GO:0010922	positive regulation of phosphatase activity	3	34	0.0434741304221294	0.203949882802821	ENSG00000164171;ENSG00000166143;ENSG00000168743
GO:0030262	apoptotic nuclear changes	3	34	0.0434741304221294	0.203949882802821	ENSG00000131747;ENSG00000147889;ENSG00000163687
GO:0032212	positive regulation of telomere maintenance via telomerase	3	34	0.0434741304221294	0.203949882802821	ENSG00000117650;ENSG00000135549;ENSG00000178999
GO:0034311	diol metabolic process	3	34	0.0434741304221294	0.203949882802821	ENSG00000141934;ENSG00000163082;ENSG00000176170
GO:0061842	microtubule organizing center localization	3	34	0.0434741304221294	0.203949882802821	ENSG00000099812;ENSG00000126787;ENSG00000164109
GO:2000758	positive regulation of peptidyl-lysine acetylation	3	34	0.0434741304221294	0.203949882802821	ENSG00000124766;ENSG00000128342;ENSG00000185499
GO:0031099	regeneration	9	200	0.0437666238114246	0.203949882802821	ENSG00000041982;ENSG00000105894;ENSG00000110195;ENSG00000118785;ENSG00000133110;ENSG00000134057;ENSG00000145386;ENSG00000155760;ENSG00000170312
GO:0033002	muscle cell proliferation	9	200	0.0437666238114246	0.203949882802821	ENSG00000051523;ENSG00000054598;ENSG00000085662;ENSG00000087245;ENSG00000100985;ENSG00000134057;ENSG00000150782;ENSG00000164171;ENSG00000170312
GO:0048608	reproductive structure development	16	431	0.0441006904664432	0.203949882802821	ENSG00000041982;ENSG00000049130;ENSG00000054598;ENSG00000088992;ENSG00000092445;ENSG00000105894;ENSG00000112559;ENSG00000113739;ENSG00000118785;ENSG00000128342;ENSG00000136943;ENSG00000137573;ENSG00000157227;ENSG00000161714;ENSG00000171345;ENSG00000179593
GO:0098656	anion transmembrane transport	12	297	0.044652189540208	0.203949882802821	ENSG00000083807;ENSG00000092068;ENSG00000103222;ENSG00000105281;ENSG00000110195;ENSG00000111371;ENSG00000116741;ENSG00000117394;ENSG00000131389;ENSG00000139514;ENSG00000141526;ENSG00000151365
GO:0031324	negative regulation of cellular metabolic process	75	2682	0.0448848036495069	0.203949882802821	ENSG00000005448;ENSG00000011422;ENSG00000050344;ENSG00000054598;ENSG00000069011;ENSG00000074800;ENSG00000077942;ENSG00000088992;ENSG00000089685;ENSG00000093009;ENSG00000094804;ENSG00000095970;ENSG00000100985;ENSG00000101443;ENSG00000104341;ENSG00000105173;ENSG00000105894;ENSG00000107984;ENSG00000109846;ENSG00000111206;ENSG00000112559;ENSG00000116741;ENSG00000117724;ENSG00000118849;ENSG00000123095…
GO:0009156	ribonucleoside monophosphate biosynthetic process	9	201	0.0449270579782509	0.203949882802821	ENSG00000067057;ENSG00000067225;ENSG00000074800;ENSG00000095970;ENSG00000106348;ENSG00000111674;ENSG00000149925;ENSG00000159399;ENSG00000170525
GO:0031638	zymogen activation	4	58	0.0452292632608828	0.203949882802821	ENSG00000074800;ENSG00000109758;ENSG00000122861;ENSG00000157227
GO:0048747	muscle fiber development	4	58	0.0452292632608828	0.203949882802821	ENSG00000113083;ENSG00000128591;ENSG00000154277;ENSG00000187957
GO:0055021	regulation of cardiac muscle tissue growth	4	58	0.0452292632608828	0.203949882802821	ENSG00000116741;ENSG00000134057;ENSG00000160211;ENSG00000170312
GO:0031347	regulation of defense response	32	1011	0.0456978940137185	0.203949882802821	ENSG00000051523;ENSG00000080293;ENSG00000087494;ENSG00000092445;ENSG00000095970;ENSG00000096088;ENSG00000100985;ENSG00000103222;ENSG00000109861;ENSG00000132965;ENSG00000135077;ENSG00000140274;ENSG00000143226;ENSG00000143546;ENSG00000145623;ENSG00000146070;ENSG00000148344;ENSG00000150782;ENSG00000155659;ENSG00000158869;ENSG00000163220;ENSG00000163687;ENSG00000164171;ENSG00000168078;ENSG00000169896…
GO:0001712	ectodermal cell fate commitment	1	2	0.0457928308726725	0.203949882802821	ENSG00000155760
GO:0002508	central tolerance induction	1	2	0.0457928308726725	0.203949882802821	ENSG00000129654
GO:0002543	activation of blood coagulation via clotting cascade	1	2	0.0457928308726725	0.203949882802821	ENSG00000117525
GO:0002582	positive regulation of antigen processing and presentation of peptide or polysaccharide antigen via MHC class II	1	2	0.0457928308726725	0.203949882802821	ENSG00000095970
GO:0002585	positive regulation of antigen processing and presentation of peptide antigen	1	2	0.0457928308726725	0.203949882802821	ENSG00000095970
GO:0002587	negative regulation of antigen processing and presentation of peptide antigen via MHC class II	1	2	0.0457928308726725	0.203949882802821	ENSG00000204252
GO:0002588	positive regulation of antigen processing and presentation of peptide antigen via MHC class II	1	2	0.0457928308726725	0.203949882802821	ENSG00000095970
GO:0002635	negative regulation of germinal center formation	1	2	0.0457928308726725	0.203949882802821	ENSG00000129654
GO:0002661	regulation of B cell tolerance induction	1	2	0.0457928308726725	0.203949882802821	ENSG00000129654
GO:0002663	positive regulation of B cell tolerance induction	1	2	0.0457928308726725	0.203949882802821	ENSG00000129654
GO:0002841	negative regulation of T cell mediated immune response to tumor cell	1	2	0.0457928308726725	0.203949882802821	ENSG00000104951
GO:0002856	negative regulation of natural killer cell mediated immune response to tumor cell	1	2	0.0457928308726725	0.203949882802821	ENSG00000135077
GO:0002859	negative regulation of natural killer cell mediated cytotoxicity directed against tumor cell target	1	2	0.0457928308726725	0.203949882802821	ENSG00000135077
GO:0003165	Purkinje myocyte development	1	2	0.0457928308726725	0.203949882802821	ENSG00000046604
GO:0005999	xylulose biosynthetic process	1	2	0.0457928308726725	0.203949882802821	ENSG00000163931
GO:0006060	sorbitol metabolic process	1	2	0.0457928308726725	0.203949882802821	ENSG00000085662
GO:0010731	protein glutathionylation	1	2	0.0457928308726725	0.203949882802821	ENSG00000160211
GO:0010732	regulation of protein glutathionylation	1	2	0.0457928308726725	0.203949882802821	ENSG00000160211
GO:0010734	negative regulation of protein glutathionylation	1	2	0.0457928308726725	0.203949882802821	ENSG00000160211
GO:0014846	esophagus smooth muscle contraction	1	2	0.0457928308726725	0.203949882802821	ENSG00000137573
GO:0015819	lysine transport	1	2	0.0457928308726725	0.203949882802821	ENSG00000139514
GO:0018931	naphthalene metabolic process	1	2	0.0457928308726725	0.203949882802821	ENSG00000085662
GO:0021812	neuronal-glial interaction involved in cerebral cortex radial glia guided migration	1	2	0.0457928308726725	0.203949882802821	ENSG00000091136
GO:0031106	septin ring organization	1	2	0.0457928308726725	0.203949882802821	ENSG00000011426
GO:0031938	regulation of chromatin silencing at telomere	1	2	0.0457928308726725	0.203949882802821	ENSG00000093009
GO:0032464	positive regulation of protein homooligomerization	1	2	0.0457928308726725	0.203949882802821	ENSG00000167972
GO:0032499	detection of peptidoglycan	1	2	0.0457928308726725	0.203949882802821	ENSG00000095970
GO:0032632	interleukin-3 production	1	2	0.0457928308726725	0.203949882802821	ENSG00000135077
GO:0032672	regulation of interleukin-3 production	1	2	0.0457928308726725	0.203949882802821	ENSG00000135077
GO:0033024	mast cell apoptotic process	1	2	0.0457928308726725	0.203949882802821	ENSG00000049130
GO:0033025	regulation of mast cell apoptotic process	1	2	0.0457928308726725	0.203949882802821	ENSG00000049130
GO:0033037	polysaccharide localization	1	2	0.0457928308726725	0.203949882802821	ENSG00000171310
GO:0033341	regulation of collagen binding	1	2	0.0457928308726725	0.203949882802821	ENSG00000164171
GO:0035606	peptidyl-cysteine S-trans-nitrosylation	1	2	0.0457928308726725	0.203949882802821	ENSG00000163220
GO:0038195	urokinase plasminogen activator signaling pathway	1	2	0.0457928308726725	0.203949882802821	ENSG00000011422
GO:0042197	halogenated hydrocarbon metabolic process	1	2	0.0457928308726725	0.203949882802821	ENSG00000130649
GO:0042489	negative regulation of odontogenesis of dentin-containing tooth	1	2	0.0457928308726725	0.203949882802821	ENSG00000164761
GO:0042663	regulation of endodermal cell fate specification	1	2	0.0457928308726725	0.203949882802821	ENSG00000107984
GO:0044779	meiotic spindle checkpoint	1	2	0.0457928308726725	0.203949882802821	ENSG00000112742
GO:0045870	positive regulation of single stranded viral RNA replication via double stranded DNA intermediate	1	2	0.0457928308726725	0.203949882802821	ENSG00000131747
GO:0046166	glyceraldehyde-3-phosphate biosynthetic process	1	2	0.0457928308726725	0.203949882802821	ENSG00000163931
GO:0046208	spermine catabolic process	1	2	0.0457928308726725	0.203949882802821	ENSG00000088826
GO:0046370	fructose biosynthetic process	1	2	0.0457928308726725	0.203949882802821	ENSG00000085662
GO:0060974	cell migration involved in heart formation	1	2	0.0457928308726725	0.203949882802821	ENSG00000110195
GO:0070194	synaptonemal complex disassembly	1	2	0.0457928308726725	0.203949882802821	ENSG00000166851
GO:0070668	positive regulation of mast cell proliferation	1	2	0.0457928308726725	0.203949882802821	ENSG00000049130
GO:0071231	cellular response to folic acid	1	2	0.0457928308726725	0.203949882802821	ENSG00000110195
GO:0071283	cellular response to iron(III) ion	1	2	0.0457928308726725	0.203949882802821	ENSG00000134057
GO:0071307	cellular response to vitamin K	1	2	0.0457928308726725	0.203949882802821	ENSG00000133110
GO:0071881	adenylate cyclase-inhibiting adrenergic receptor signaling pathway	1	2	0.0457928308726725	0.203949882802821	ENSG00000116741
GO:0090191	negative regulation of branching involved in ureteric bud morphogenesis	1	2	0.0457928308726725	0.203949882802821	ENSG00000184292
GO:0090233	negative regulation of spindle checkpoint	1	2	0.0457928308726725	0.203949882802821	ENSG00000167513
GO:0090420	naphthalene-containing compound metabolic process	1	2	0.0457928308726725	0.203949882802821	ENSG00000085662
GO:0097238	cellular response to methylglyoxal	1	2	0.0457928308726725	0.203949882802821	ENSG00000085662
GO:0099178	regulation of retrograde trans-synaptic signaling by endocanabinoid	1	2	0.0457928308726725	0.203949882802821	ENSG00000164687
GO:0099607	lateral attachment of mitotic spindle microtubules to kinetochore	1	2	0.0457928308726725	0.203949882802821	ENSG00000178999
GO:0110090	positive regulation of hippocampal neuron apoptotic process	1	2	0.0457928308726725	0.203949882802821	ENSG00000169896
GO:0140105	interleukin-10-mediated signaling pathway	1	2	0.0457928308726725	0.203949882802821	ENSG00000186818
GO:1900923	regulation of glycine import across plasma membrane	1	2	0.0457928308726725	0.203949882802821	ENSG00000116741
GO:1900924	negative regulation of glycine import across plasma membrane	1	2	0.0457928308726725	0.203949882802821	ENSG00000116741
GO:1901076	positive regulation of engulfment of apoptotic cell	1	2	0.0457928308726725	0.203949882802821	ENSG00000095970
GO:1901246	regulation of lung ciliated cell differentiation	1	2	0.0457928308726725	0.203949882802821	ENSG00000129654
GO:1901295	regulation of canonical Wnt signaling pathway involved in cardiac muscle cell fate commitment	1	2	0.0457928308726725	0.203949882802821	ENSG00000107984
GO:1901899	positive regulation of relaxation of cardiac muscle	1	2	0.0457928308726725	0.203949882802821	ENSG00000100604
GO:1901980	positive regulation of inward rectifier potassium channel activity	1	2	0.0457928308726725	0.203949882802821	ENSG00000095970
GO:1902257	negative regulation of apoptotic process involved in outflow tract morphogenesis	1	2	0.0457928308726725	0.203949882802821	ENSG00000054598
GO:1902298	cell cycle DNA replication maintenance of fidelity	1	2	0.0457928308726725	0.203949882802821	ENSG00000051180
GO:1902426	deactivation of mitotic spindle assembly checkpoint	1	2	0.0457928308726725	0.203949882802821	ENSG00000167513
GO:1902595	regulation of DNA replication origin binding	1	2	0.0457928308726725	0.203949882802821	ENSG00000167513
GO:1904092	regulation of autophagic cell death	1	2	0.0457928308726725	0.203949882802821	ENSG00000095970
GO:1904093	negative regulation of autophagic cell death	1	2	0.0457928308726725	0.203949882802821	ENSG00000095970
GO:1904106	protein localization to microvillus	1	2	0.0457928308726725	0.203949882802821	ENSG00000006611
GO:1904170	regulation of bleb assembly	1	2	0.0457928308726725	0.203949882802821	ENSG00000011426
GO:1904172	positive regulation of bleb assembly	1	2	0.0457928308726725	0.203949882802821	ENSG00000011426
GO:1904373	response to kainic acid	1	2	0.0457928308726725	0.203949882802821	ENSG00000105894
GO:1904397	negative regulation of neuromuscular junction development	1	2	0.0457928308726725	0.203949882802821	ENSG00000105894
GO:1904879	positive regulation of calcium ion transmembrane transport via high voltage-gated calcium channel	1	2	0.0457928308726725	0.203949882802821	ENSG00000160211
GO:1905066	regulation of canonical Wnt signaling pathway involved in heart development	1	2	0.0457928308726725	0.203949882802821	ENSG00000107984
GO:1905184	positive regulation of protein serine/threonine phosphatase activity	1	2	0.0457928308726725	0.203949882802821	ENSG00000166143
GO:1905918	regulation of CoA-transferase activity	1	2	0.0457928308726725	0.203949882802821	ENSG00000175344
GO:1905920	positive regulation of CoA-transferase activity	1	2	0.0457928308726725	0.203949882802821	ENSG00000175344
GO:1990426	mitotic recombination-dependent replication fork processing	1	2	0.0457928308726725	0.203949882802821	ENSG00000051180
GO:1990505	mitotic DNA replication maintenance of fidelity	1	2	0.0457928308726725	0.203949882802821	ENSG00000051180
GO:1990790	response to glial cell derived neurotrophic factor	1	2	0.0457928308726725	0.203949882802821	ENSG00000076864
GO:1990792	cellular response to glial cell derived neurotrophic factor	1	2	0.0457928308726725	0.203949882802821	ENSG00000076864
GO:2000383	regulation of ectoderm development	1	2	0.0457928308726725	0.203949882802821	ENSG00000155760
GO:2000384	negative regulation of ectoderm development	1	2	0.0457928308726725	0.203949882802821	ENSG00000155760
GO:2000521	negative regulation of immunological synapse formation	1	2	0.0457928308726725	0.203949882802821	ENSG00000135077
GO:2000707	positive regulation of dense core granule biogenesis	1	2	0.0457928308726725	0.203949882802821	ENSG00000100604
GO:2000721	positive regulation of transcription from RNA polymerase II promoter involved in smooth muscle cell differentiation	1	2	0.0457928308726725	0.203949882802821	ENSG00000168743
GO:2000866	positive regulation of estradiol secretion	1	2	0.0457928308726725	0.203949882802821	ENSG00000118785
GO:2001189	negative regulation of T cell activation via T cell receptor contact with antigen bound to MHC molecule on antigen presenting cell	1	2	0.0457928308726725	0.203949882802821	ENSG00000135077
GO:0043549	regulation of kinase activity	29	900	0.0459510072944749	0.203949882802821	ENSG00000049130;ENSG00000077782;ENSG00000088325;ENSG00000088992;ENSG00000092445;ENSG00000094804;ENSG00000105173;ENSG00000107984;ENSG00000114346;ENSG00000116741;ENSG00000130427;ENSG00000130829;ENSG00000134057;ENSG00000135549;ENSG00000143125;ENSG00000145386;ENSG00000147852;ENSG00000147889;ENSG00000150782;ENSG00000154277;ENSG00000157456;ENSG00000164045;ENSG00000166851;ENSG00000168078;ENSG00000175344…
GO:1900180	regulation of protein localization to nucleus	7	141	0.0460136613209417	0.203949882802821	ENSG00000075218;ENSG00000114346;ENSG00000128342;ENSG00000147889;ENSG00000166851;ENSG00000170312;ENSG00000186818
GO:0030148	sphingolipid biosynthetic process	6	112	0.0460196420437013	0.203949882802821	ENSG00000128242;ENSG00000136840;ENSG00000141934;ENSG00000163082;ENSG00000164181;ENSG00000176170
GO:0032526	response to retinoic acid	6	112	0.0460196420437013	0.203949882802821	ENSG00000041982;ENSG00000088992;ENSG00000112655;ENSG00000148344;ENSG00000155760;ENSG00000221926
GO:0002921	negative regulation of humoral immune response	2	15	0.0460639066221923	0.203949882802821	ENSG00000129654;ENSG00000155659
GO:0006266	DNA ligation	2	15	0.0460639066221923	0.203949882802821	ENSG00000051180;ENSG00000131747
GO:0010715	regulation of extracellular matrix disassembly	2	15	0.0460639066221923	0.203949882802821	ENSG00000075618;ENSG00000204580
GO:0032328	alanine transport	2	15	0.0460639066221923	0.203949882802821	ENSG00000092068;ENSG00000131389
GO:0036376	sodium ion export across plasma membrane	2	15	0.0460639066221923	0.203949882802821	ENSG00000069849;ENSG00000137731
GO:0038065	collagen-activated signaling pathway	2	15	0.0460639066221923	0.203949882802821	ENSG00000164171;ENSG00000204580
GO:0042249	establishment of planar polarity of embryonic epithelium	2	15	0.0460639066221923	0.203949882802821	ENSG00000112655;ENSG00000164932
GO:0048875	chemical homeostasis within a tissue	2	15	0.0460639066221923	0.203949882802821	ENSG00000153395;ENSG00000167972
GO:0051238	sequestering of metal ion	2	15	0.0460639066221923	0.203949882802821	ENSG00000143546;ENSG00000163220
GO:0051299	centrosome separation	2	15	0.0460639066221923	0.203949882802821	ENSG00000117650;ENSG00000138160
GO:0060099	regulation of phagocytosis, engulfment	2	15	0.0460639066221923	0.203949882802821	ENSG00000095970;ENSG00000164171
GO:0070207	protein homotrimerization	2	15	0.0460639066221923	0.203949882802821	ENSG00000105281;ENSG00000132965
GO:0090185	negative regulation of kidney development	2	15	0.0460639066221923	0.203949882802821	ENSG00000100985;ENSG00000184292
GO:1902101	positive regulation of metaphase/anaphase transition of cell cycle	2	15	0.0460639066221923	0.203949882802821	ENSG00000126787;ENSG00000167513
GO:2000052	positive regulation of non-canonical Wnt signaling pathway	2	15	0.0460639066221923	0.203949882802821	ENSG00000107984;ENSG00000153071
GO:0061458	reproductive system development	16	434	0.0464313035364931	0.205412086845446	ENSG00000041982;ENSG00000049130;ENSG00000054598;ENSG00000088992;ENSG00000092445;ENSG00000105894;ENSG00000112559;ENSG00000113739;ENSG00000118785;ENSG00000128342;ENSG00000136943;ENSG00000137573;ENSG00000157227;ENSG00000161714;ENSG00000171345;ENSG00000179593
GO:0051241	negative regulation of multicellular organismal process	38	1239	0.0466724509962219	0.206313872109598	ENSG00000011422;ENSG00000051523;ENSG00000054598;ENSG00000070087;ENSG00000076864;ENSG00000077942;ENSG00000087494;ENSG00000095970;ENSG00000100985;ENSG00000104341;ENSG00000104435;ENSG00000105894;ENSG00000107984;ENSG00000109861;ENSG00000116741;ENSG00000117525;ENSG00000118785;ENSG00000120057;ENSG00000122133;ENSG00000122861;ENSG00000129654;ENSG00000135077;ENSG00000137573;ENSG00000145708;ENSG00000147889…
GO:0010765	positive regulation of sodium ion transport	3	35	0.0467600733558867	0.206536106755634	ENSG00000069849;ENSG00000088992;ENSG00000137731
GO:1901654	response to ketone	9	203	0.0473092537754842	0.208795030629232	ENSG00000041982;ENSG00000051523;ENSG00000085662;ENSG00000105894;ENSG00000107159;ENSG00000118785;ENSG00000130427;ENSG00000165168;ENSG00000181019
GO:0010324	membrane invagination	7	142	0.0474823954985925	0.209331488537045	ENSG00000095970;ENSG00000164171;ENSG00000169896;ENSG00000178999;ENSG00000211935;ENSG00000211950;ENSG00000232216
GO:0051707	response to other organism	33	1052	0.0475136263899675	0.209331488537045	ENSG00000051523;ENSG00000074800;ENSG00000090104;ENSG00000092929;ENSG00000095970;ENSG00000096088;ENSG00000100604;ENSG00000101443;ENSG00000124102;ENSG00000130427;ENSG00000130649;ENSG00000133063;ENSG00000135077;ENSG00000137309;ENSG00000140505;ENSG00000143546;ENSG00000148344;ENSG00000150782;ENSG00000151365;ENSG00000158869;ENSG00000163220;ENSG00000163735;ENSG00000163739;ENSG00000166920;ENSG00000169429…
GO:0008016	regulation of heart contraction	10	235	0.047666209788935	0.209331488537045	ENSG00000046604;ENSG00000053918;ENSG00000069849;ENSG00000075461;ENSG00000089356;ENSG00000096433;ENSG00000100604;ENSG00000116741;ENSG00000137731;ENSG00000175084
GO:0001836	release of cytochrome c from mitochondria	4	59	0.0476676746907255	0.209331488537045	ENSG00000011422;ENSG00000100985;ENSG00000175793;ENSG00000214253
GO:0002763	positive regulation of myeloid leukocyte differentiation	4	59	0.0476676746907255	0.209331488537045	ENSG00000049130;ENSG00000088992;ENSG00000095970;ENSG00000128342
GO:0002931	response to ischemia	4	59	0.0476676746907255	0.209331488537045	ENSG00000095970;ENSG00000154277;ENSG00000159399;ENSG00000181019
GO:0001909	leukocyte mediated cytotoxicity	6	113	0.0476957821983141	0.209331488537045	ENSG00000092929;ENSG00000109861;ENSG00000135077;ENSG00000150782;ENSG00000163687;ENSG00000169896
GO:0043207	response to external biotic stimulus	33	1053	0.0480259860682665	0.21047644924743	ENSG00000051523;ENSG00000074800;ENSG00000090104;ENSG00000092929;ENSG00000095970;ENSG00000096088;ENSG00000100604;ENSG00000101443;ENSG00000124102;ENSG00000130427;ENSG00000130649;ENSG00000133063;ENSG00000135077;ENSG00000137309;ENSG00000140505;ENSG00000143546;ENSG00000148344;ENSG00000150782;ENSG00000151365;ENSG00000158869;ENSG00000163220;ENSG00000163735;ENSG00000163739;ENSG00000166920;ENSG00000169429…
GO:0048568	embryonic organ development	16	436	0.048032781003663	0.21047644924743	ENSG00000006611;ENSG00000049130;ENSG00000054598;ENSG00000110195;ENSG00000112559;ENSG00000112655;ENSG00000117122;ENSG00000128342;ENSG00000137285;ENSG00000157227;ENSG00000161714;ENSG00000164932;ENSG00000169429;ENSG00000171310;ENSG00000171345;ENSG00000260027
GO:1901564	organonitrogen compound metabolic process	183	7171	0.0482489270701123	0.211256188992653	ENSG00000005001;ENSG00000005421;ENSG00000005448;ENSG00000006118;ENSG00000011422;ENSG00000038427;ENSG00000041982;ENSG00000046774;ENSG00000049130;ENSG00000051180;ENSG00000054598;ENSG00000067057;ENSG00000067225;ENSG00000070087;ENSG00000074800;ENSG00000076716;ENSG00000077274;ENSG00000077782;ENSG00000077942;ENSG00000085662;ENSG00000087245;ENSG00000087494;ENSG00000088325;ENSG00000088826;ENSG00000088882…
GO:0045766	positive regulation of angiogenesis	8	173	0.0486203789454122	0.212546004401683	ENSG00000067225;ENSG00000102359;ENSG00000117525;ENSG00000159399;ENSG00000165168;ENSG00000169429;ENSG00000175344;ENSG00000176170
GO:0048469	cell maturation	8	173	0.0486203789454122	0.212546004401683	ENSG00000071539;ENSG00000085662;ENSG00000091129;ENSG00000122133;ENSG00000130427;ENSG00000134057;ENSG00000154040;ENSG00000160211
GO:0002687	positive regulation of leukocyte migration	7	143	0.0489807272589598	0.213952149875235	ENSG00000049130;ENSG00000095970;ENSG00000105894;ENSG00000146070;ENSG00000157227;ENSG00000164171;ENSG00000169429
GO:0048871	multicellular organismal homeostasis	18	507	0.0490291842273686	0.213994781986857	ENSG00000006611;ENSG00000007062;ENSG00000054598;ENSG00000085662;ENSG00000117122;ENSG00000117394;ENSG00000118785;ENSG00000148344;ENSG00000150782;ENSG00000153395;ENSG00000160181;ENSG00000160182;ENSG00000164687;ENSG00000164761;ENSG00000167972;ENSG00000171199;ENSG00000175793;ENSG00000187688
GO:0006260	DNA replication	13	335	0.049154237157696	0.214370137890514	ENSG00000051180;ENSG00000085840;ENSG00000093009;ENSG00000094804;ENSG00000101003;ENSG00000105173;ENSG00000137309;ENSG00000145386;ENSG00000159259;ENSG00000163191;ENSG00000167513;ENSG00000170312;ENSG00000174371
GO:0006952	defense response	56	1941	0.0491927133784923	0.214370137890514	ENSG00000051523;ENSG00000080293;ENSG00000087494;ENSG00000092445;ENSG00000092929;ENSG00000095970;ENSG00000096088;ENSG00000100604;ENSG00000100985;ENSG00000101443;ENSG00000102034;ENSG00000103222;ENSG00000105894;ENSG00000106123;ENSG00000109861;ENSG00000116701;ENSG00000117525;ENSG00000118785;ENSG00000124102;ENSG00000130427;ENSG00000132965;ENSG00000135077;ENSG00000140274;ENSG00000140835;ENSG00000143226…
GO:0009607	response to biotic stimulus	34	1093	0.0492610135671922	0.214498744115412	ENSG00000051523;ENSG00000074800;ENSG00000090104;ENSG00000092929;ENSG00000095970;ENSG00000096088;ENSG00000100604;ENSG00000101443;ENSG00000104951;ENSG00000124102;ENSG00000130427;ENSG00000130649;ENSG00000133063;ENSG00000135077;ENSG00000137309;ENSG00000140505;ENSG00000143546;ENSG00000148344;ENSG00000150782;ENSG00000151365;ENSG00000158869;ENSG00000163220;ENSG00000163735;ENSG00000163739;ENSG00000166920…
GO:0071277	cellular response to calcium ion	5	86	0.049407523298481	0.214805868698213	ENSG00000019505;ENSG00000085491;ENSG00000114346;ENSG00000132965;ENSG00000145708
GO:0090175	regulation of establishment of planar polarity	6	114	0.0494092341743448	0.214805868698213	ENSG00000076716;ENSG00000107984;ENSG00000112655;ENSG00000153071;ENSG00000155760;ENSG00000164932
GO:0001501	skeletal system development	18	508	0.0497938084595869	0.216307746097027	ENSG00000038427;ENSG00000049089;ENSG00000054598;ENSG00000069011;ENSG00000077782;ENSG00000087245;ENSG00000087494;ENSG00000100985;ENSG00000112559;ENSG00000113083;ENSG00000124766;ENSG00000132031;ENSG00000137573;ENSG00000157227;ENSG00000164761;ENSG00000171310;ENSG00000178882;ENSG00000260027
GO:0007050	cell cycle arrest	10	237	0.0499506182902653	0.216613633141326	ENSG00000068489;ENSG00000075218;ENSG00000111206;ENSG00000124766;ENSG00000134057;ENSG00000147889;ENSG00000169429;ENSG00000170312;ENSG00000175793;ENSG00000185499
GO:0015893	drug transport	10	237	0.0499506182902653	0.216613633141326	ENSG00000019505;ENSG00000085491;ENSG00000092068;ENSG00000103222;ENSG00000105281;ENSG00000110195;ENSG00000116741;ENSG00000139514;ENSG00000167972;ENSG00000175003
GO:0006739	NADP metabolic process	3	36	0.0501648663383258	0.216613633141326	ENSG00000160211;ENSG00000163931;ENSG00000181019
GO:0006921	cellular component disassembly involved in execution phase of apoptosis	3	36	0.0501648663383258	0.216613633141326	ENSG00000131747;ENSG00000147889;ENSG00000163687
GO:0044818	mitotic G2/M transition checkpoint	3	36	0.0501648663383258	0.216613633141326	ENSG00000085840;ENSG00000094804;ENSG00000170312
GO:0051973	positive regulation of telomerase activity	3	36	0.0501648663383258	0.216613633141326	ENSG00000117650;ENSG00000135549;ENSG00000178999
GO:0060236	regulation of mitotic spindle organization	3	36	0.0501648663383258	0.216613633141326	ENSG00000013810;ENSG00000088325;ENSG00000166851
GO:0006940	regulation of smooth muscle contraction	4	60	0.050177588436535	0.216613633141326	ENSG00000116741;ENSG00000164171;ENSG00000168743;ENSG00000176170
GO:0030111	regulation of Wnt signaling pathway	14	370	0.0502684182488721	0.216836468733434	ENSG00000005884;ENSG00000035499;ENSG00000107984;ENSG00000110195;ENSG00000112559;ENSG00000112655;ENSG00000120057;ENSG00000122870;ENSG00000124766;ENSG00000137573;ENSG00000153071;ENSG00000155760;ENSG00000164932;ENSG00000169862
GO:0043393	regulation of protein binding	9	206	0.0510374647165417	0.219818550866173	ENSG00000100985;ENSG00000106123;ENSG00000107984;ENSG00000113083;ENSG00000153071;ENSG00000164932;ENSG00000166851;ENSG00000172425;ENSG00000178999
GO:0046677	response to antibiotic	13	337	0.0510789941886134	0.219818550866173	ENSG00000041982;ENSG00000109846;ENSG00000114346;ENSG00000116741;ENSG00000130649;ENSG00000143546;ENSG00000145708;ENSG00000160211;ENSG00000165168;ENSG00000170312;ENSG00000176170;ENSG00000181019;ENSG00000183010
GO:0050863	regulation of T cell activation	13	337	0.0510789941886134	0.219818550866173	ENSG00000104951;ENSG00000106123;ENSG00000124766;ENSG00000129654;ENSG00000130427;ENSG00000135077;ENSG00000139514;ENSG00000147889;ENSG00000150782;ENSG00000155659;ENSG00000186818;ENSG00000204252;ENSG00000272398
GO:0006890	retrograde vesicle-mediated transport, Golgi to ER	5	87	0.0514694651965349	0.220379778752537	ENSG00000090889;ENSG00000137807;ENSG00000138160;ENSG00000142945;ENSG00000161800
GO:0008610	lipid biosynthetic process	24	726	0.0517182490417473	0.220379778752537	ENSG00000083807;ENSG00000085662;ENSG00000128242;ENSG00000130649;ENSG00000132965;ENSG00000136840;ENSG00000140505;ENSG00000141934;ENSG00000148344;ENSG00000151365;ENSG00000153395;ENSG00000153933;ENSG00000160211;ENSG00000160868;ENSG00000163082;ENSG00000164181;ENSG00000164687;ENSG00000166391;ENSG00000167972;ENSG00000170509;ENSG00000176170;ENSG00000176454;ENSG00000179593;ENSG00000227471
GO:0006098	pentose-phosphate shunt	2	16	0.0518558311975419	0.220379778752537	ENSG00000160211;ENSG00000163931
GO:0006268	DNA unwinding involved in DNA replication	2	16	0.0518558311975419	0.220379778752537	ENSG00000051180;ENSG00000137309
GO:0019321	pentose metabolic process	2	16	0.0518558311975419	0.220379778752537	ENSG00000160211;ENSG00000163931
GO:0019511	peptidyl-proline hydroxylation	2	16	0.0518558311975419	0.220379778752537	ENSG00000110811;ENSG00000129521
GO:0030033	microvillus assembly	2	16	0.0518558311975419	0.220379778752537	ENSG00000075618;ENSG00000076864
GO:0032604	granulocyte macrophage colony-stimulating factor production	2	16	0.0518558311975419	0.220379778752537	ENSG00000122133;ENSG00000150782
GO:0032645	regulation of granulocyte macrophage colony-stimulating factor production	2	16	0.0518558311975419	0.220379778752537	ENSG00000122133;ENSG00000150782
GO:0048385	regulation of retinoic acid receptor signaling pathway	2	16	0.0518558311975419	0.220379778752537	ENSG00000185686;ENSG00000221926
GO:0055012	ventricular cardiac muscle cell differentiation	2	16	0.0518558311975419	0.220379778752537	ENSG00000134057;ENSG00000170312
GO:0090343	positive regulation of cell aging	2	16	0.0518558311975419	0.220379778752537	ENSG00000137309;ENSG00000147889
GO:1905153	regulation of membrane invagination	2	16	0.0518558311975419	0.220379778752537	ENSG00000095970;ENSG00000164171
GO:1905331	negative regulation of morphogenesis of an epithelium	2	16	0.0518558311975419	0.220379778752537	ENSG00000137573;ENSG00000184292
GO:2000095	regulation of Wnt signaling pathway, planar cell polarity pathway	2	16	0.0518558311975419	0.220379778752537	ENSG00000107984;ENSG00000153071
GO:2000651	positive regulation of sodium ion transmembrane transporter activity	2	16	0.0518558311975419	0.220379778752537	ENSG00000088992;ENSG00000137731
GO:0044255	cellular lipid metabolic process	34	1098	0.0518868846176859	0.220379778752537	ENSG00000005421;ENSG00000076716;ENSG00000083807;ENSG00000085662;ENSG00000106258;ENSG00000114113;ENSG00000121316;ENSG00000128242;ENSG00000130649;ENSG00000132965;ENSG00000136840;ENSG00000139547;ENSG00000140505;ENSG00000141934;ENSG00000143320;ENSG00000144959;ENSG00000146070;ENSG00000148344;ENSG00000151365;ENSG00000153395;ENSG00000153933;ENSG00000160868;ENSG00000163082;ENSG00000164181;ENSG00000164687…
GO:0061024	membrane organization	32	1023	0.0520597208144975	0.220944171990922	ENSG00000019505;ENSG00000075461;ENSG00000091129;ENSG00000095970;ENSG00000103222;ENSG00000104341;ENSG00000104419;ENSG00000105894;ENSG00000109861;ENSG00000110195;ENSG00000112984;ENSG00000134057;ENSG00000138119;ENSG00000138180;ENSG00000145920;ENSG00000153071;ENSG00000157456;ENSG00000159399;ENSG00000161249;ENSG00000163220;ENSG00000164171;ENSG00000166851;ENSG00000167972;ENSG00000169896;ENSG00000170312…
GO:0022008	neurogenesis	49	1675	0.0523874284657483	0.222164478079439	ENSG00000005884;ENSG00000006611;ENSG00000007062;ENSG00000038427;ENSG00000041982;ENSG00000058085;ENSG00000076864;ENSG00000077782;ENSG00000091129;ENSG00000091136;ENSG00000095970;ENSG00000104419;ENSG00000104435;ENSG00000105894;ENSG00000107984;ENSG00000110195;ENSG00000112655;ENSG00000113758;ENSG00000114346;ENSG00000116741;ENSG00000117399;ENSG00000118785;ENSG00000123095;ENSG00000124766;ENSG00000128342…
GO:0009628	response to abiotic stimulus	38	1251	0.052494021504358	0.222445930206207	ENSG00000021300;ENSG00000041982;ENSG00000051180;ENSG00000051523;ENSG00000074800;ENSG00000085662;ENSG00000087245;ENSG00000100985;ENSG00000104419;ENSG00000105894;ENSG00000107159;ENSG00000109846;ENSG00000113739;ENSG00000114346;ENSG00000117394;ENSG00000122861;ENSG00000129521;ENSG00000130427;ENSG00000133110;ENSG00000134057;ENSG00000135245;ENSG00000137673;ENSG00000145386;ENSG00000157227;ENSG00000159399…
GO:0060393	regulation of pathway-restricted SMAD protein phosphorylation	4	61	0.052758793094747	0.223226856947401	ENSG00000107984;ENSG00000112742;ENSG00000124225;ENSG00000153071
GO:0046434	organophosphate catabolic process	11	272	0.0527590419584545	0.223226856947401	ENSG00000005421;ENSG00000054179;ENSG00000067057;ENSG00000067225;ENSG00000074800;ENSG00000111674;ENSG00000121316;ENSG00000146070;ENSG00000149925;ENSG00000159399;ENSG00000170525
GO:0031623	receptor internalization	6	116	0.0529485270428276	0.223686290715689	ENSG00000005448;ENSG00000075461;ENSG00000107984;ENSG00000158869;ENSG00000169429;ENSG00000186818
GO:1903510	mucopolysaccharide metabolic process	6	116	0.0529485270428276	0.223686290715689	ENSG00000038427;ENSG00000122176;ENSG00000123243;ENSG00000156966;ENSG00000171310;ENSG00000175040
GO:0016310	phosphorylation	69	2466	0.0530193454998692	0.223814489018532	ENSG00000005448;ENSG00000011422;ENSG00000049130;ENSG00000051180;ENSG00000067057;ENSG00000067225;ENSG00000070087;ENSG00000074800;ENSG00000077782;ENSG00000077942;ENSG00000088325;ENSG00000088992;ENSG00000089685;ENSG00000092445;ENSG00000094804;ENSG00000095970;ENSG00000100985;ENSG00000102359;ENSG00000105173;ENSG00000106123;ENSG00000107984;ENSG00000109846;ENSG00000111206;ENSG00000111674;ENSG00000112655…
GO:0006066	alcohol metabolic process	14	373	0.0530692360601556	0.223854214654966	ENSG00000005421;ENSG00000085662;ENSG00000106258;ENSG00000139547;ENSG00000140505;ENSG00000141934;ENSG00000147852;ENSG00000160211;ENSG00000160868;ENSG00000161714;ENSG00000163082;ENSG00000166391;ENSG00000176170;ENSG00000227471
GO:0030101	natural killer cell activation	5	88	0.0535810783711438	0.225085984581977	ENSG00000092445;ENSG00000092929;ENSG00000102034;ENSG00000135077;ENSG00000150782
GO:0002685	regulation of leukocyte migration	9	208	0.0536273627555849	0.225085984581977	ENSG00000049130;ENSG00000095970;ENSG00000105894;ENSG00000146070;ENSG00000151882;ENSG00000157227;ENSG00000158747;ENSG00000164171;ENSG00000169429
GO:0006865	amino acid transport	7	146	0.0536544910756343	0.225085984581977	ENSG00000092068;ENSG00000105281;ENSG00000111371;ENSG00000116741;ENSG00000131389;ENSG00000139514;ENSG00000140107
GO:0031644	regulation of neurological system process	7	146	0.0536544910756343	0.225085984581977	ENSG00000075461;ENSG00000106236;ENSG00000109861;ENSG00000164171;ENSG00000164687;ENSG00000171199;ENSG00000175344
GO:0046390	ribose phosphate biosynthetic process	12	306	0.0536825480238402	0.225085984581977	ENSG00000067057;ENSG00000067225;ENSG00000074800;ENSG00000095970;ENSG00000106348;ENSG00000111674;ENSG00000149925;ENSG00000159399;ENSG00000160211;ENSG00000163931;ENSG00000164181;ENSG00000170525
GO:0046471	phosphatidylglycerol metabolic process	3	37	0.053686874080222	0.225085984581977	ENSG00000153395;ENSG00000167972;ENSG00000176454
GO:0060428	lung epithelium development	3	37	0.053686874080222	0.225085984581977	ENSG00000106541;ENSG00000124664;ENSG00000129654
GO:1904358	positive regulation of telomere maintenance via telomere lengthening	3	37	0.053686874080222	0.225085984581977	ENSG00000117650;ENSG00000135549;ENSG00000178999
GO:0006006	glucose metabolic process	9	209	0.054953908147778	0.23004928997518	ENSG00000067057;ENSG00000067225;ENSG00000074800;ENSG00000111674;ENSG00000149925;ENSG00000159399;ENSG00000160211;ENSG00000164687;ENSG00000215644
GO:0009124	nucleoside monophosphate biosynthetic process	9	209	0.054953908147778	0.23004928997518	ENSG00000067057;ENSG00000067225;ENSG00000074800;ENSG00000095970;ENSG00000106348;ENSG00000111674;ENSG00000149925;ENSG00000159399;ENSG00000170525
GO:1901342	regulation of vasculature development	13	341	0.0550825739395012	0.230413490079759	ENSG00000054598;ENSG00000067225;ENSG00000102359;ENSG00000105894;ENSG00000117525;ENSG00000137573;ENSG00000143125;ENSG00000157613;ENSG00000159399;ENSG00000165168;ENSG00000169429;ENSG00000175344;ENSG00000176170
GO:0071495	cellular response to endogenous stimulus	42	1410	0.0553024683454759	0.230740173109143	ENSG00000005884;ENSG00000041982;ENSG00000051180;ENSG00000051523;ENSG00000053918;ENSG00000054598;ENSG00000067225;ENSG00000076864;ENSG00000077782;ENSG00000085662;ENSG00000087245;ENSG00000094804;ENSG00000095970;ENSG00000103222;ENSG00000104435;ENSG00000105894;ENSG00000110195;ENSG00000113083;ENSG00000118785;ENSG00000120057;ENSG00000122176;ENSG00000124225;ENSG00000133110;ENSG00000137573;ENSG00000145386…
GO:0001525	angiogenesis	18	515	0.0553844880806713	0.230740173109143	ENSG00000054598;ENSG00000067225;ENSG00000087245;ENSG00000091129;ENSG00000102359;ENSG00000105894;ENSG00000117525;ENSG00000137573;ENSG00000143125;ENSG00000150782;ENSG00000157227;ENSG00000157613;ENSG00000159399;ENSG00000161714;ENSG00000165168;ENSG00000169429;ENSG00000175344;ENSG00000176170
GO:0030865	cortical cytoskeleton organization	4	62	0.0554110216797363	0.230740173109143	ENSG00000011426;ENSG00000114346;ENSG00000157827;ENSG00000161800
GO:0045143	homologous chromosome segregation	4	62	0.0554110216797363	0.230740173109143	ENSG00000071539;ENSG00000105173;ENSG00000164611;ENSG00000166851
GO:1901016	regulation of potassium ion transmembrane transporter activity	4	62	0.0554110216797363	0.230740173109143	ENSG00000053918;ENSG00000069849;ENSG00000095970;ENSG00000137731
GO:1901381	positive regulation of potassium ion transmembrane transport	4	62	0.0554110216797363	0.230740173109143	ENSG00000053918;ENSG00000069849;ENSG00000095970;ENSG00000137731
GO:0014812	muscle cell migration	5	89	0.0557423728763406	0.23194531377439	ENSG00000122861;ENSG00000133110;ENSG00000163191;ENSG00000164171;ENSG00000204580
GO:0120035	regulation of plasma membrane bounded cell projection organization	23	696	0.0561708758790614	0.23355258918136	ENSG00000005884;ENSG00000006611;ENSG00000011426;ENSG00000070087;ENSG00000075618;ENSG00000076864;ENSG00000091129;ENSG00000095970;ENSG00000104435;ENSG00000105894;ENSG00000112655;ENSG00000113758;ENSG00000116741;ENSG00000117399;ENSG00000118785;ENSG00000130427;ENSG00000137285;ENSG00000143320;ENSG00000147852;ENSG00000163220;ENSG00000184292;ENSG00000187688;ENSG00000198758
GO:0007613	memory	6	118	0.0566382742074863	0.23514238466021	ENSG00000005884;ENSG00000096433;ENSG00000105894;ENSG00000147852;ENSG00000172425;ENSG00000175344
GO:0072089	stem cell proliferation	6	118	0.0566382742074863	0.23514238466021	ENSG00000049130;ENSG00000077942;ENSG00000105173;ENSG00000105894;ENSG00000161800;ENSG00000206557
GO:0048284	organelle fusion	7	148	0.0569203263840921	0.235959074140952	ENSG00000019505;ENSG00000074800;ENSG00000111674;ENSG00000145920;ENSG00000170312;ENSG00000176170;ENSG00000214253
GO:0097530	granulocyte migration	7	148	0.0569203263840921	0.235959074140952	ENSG00000143546;ENSG00000158869;ENSG00000163220;ENSG00000163735;ENSG00000163739;ENSG00000169347;ENSG00000169429
GO:0045742	positive regulation of epidermal growth factor receptor signaling pathway	3	38	0.0573243440694345	0.237100690130122	ENSG00000011422;ENSG00000100985;ENSG00000106541
GO:0071392	cellular response to estradiol stimulus	3	38	0.0573243440694345	0.237100690130122	ENSG00000145386;ENSG00000145708;ENSG00000164171
GO:2001171	positive regulation of ATP biosynthetic process	3	38	0.0573243440694345	0.237100690130122	ENSG00000074800;ENSG00000095970;ENSG00000170525
GO:0043523	regulation of neuron apoptotic process	9	211	0.0576705969582478	0.237393135076549	ENSG00000089685;ENSG00000092445;ENSG00000101057;ENSG00000129521;ENSG00000160211;ENSG00000164379;ENSG00000169896;ENSG00000181019;ENSG00000214253
GO:0098609	cell-cell adhesion	28	883	0.057875617874251	0.237393135076549	ENSG00000011422;ENSG00000046604;ENSG00000076716;ENSG00000091129;ENSG00000091136;ENSG00000092445;ENSG00000102359;ENSG00000104951;ENSG00000106123;ENSG00000124766;ENSG00000126259;ENSG00000129654;ENSG00000130427;ENSG00000134873;ENSG00000135077;ENSG00000139514;ENSG00000143546;ENSG00000147889;ENSG00000150782;ENSG00000151882;ENSG00000155659;ENSG00000163191;ENSG00000163220;ENSG00000168743;ENSG00000169862…
GO:0006978	DNA damage response, signal transduction by p53 class mediator resulting in transcription of p21 class mediator	2	17	0.0578913431162138	0.237393135076549	ENSG00000111206;ENSG00000185499
GO:0048569	post-embryonic animal organ development	2	17	0.0578913431162138	0.237393135076549	ENSG00000117122;ENSG00000157483
GO:0055119	relaxation of cardiac muscle	2	17	0.0578913431162138	0.237393135076549	ENSG00000100604;ENSG00000116741
GO:0061687	detoxification of inorganic compound	2	17	0.0578913431162138	0.237393135076549	ENSG00000169715;ENSG00000187193
GO:0061952	midbody abscission	2	17	0.0578913431162138	0.237393135076549	ENSG00000112984;ENSG00000138180
GO:0070206	protein trimerization	2	17	0.0578913431162138	0.237393135076549	ENSG00000105281;ENSG00000132965
GO:1901857	positive regulation of cellular respiration	2	17	0.0578913431162138	0.237393135076549	ENSG00000134057;ENSG00000170312
GO:1905820	positive regulation of chromosome separation	2	17	0.0578913431162138	0.237393135076549	ENSG00000126787;ENSG00000167513
GO:2001267	regulation of cysteine-type endopeptidase activity involved in apoptotic signaling pathway	2	17	0.0578913431162138	0.237393135076549	ENSG00000011422;ENSG00000100985
GO:0051249	regulation of lymphocyte activation	18	518	0.0579101879237369	0.237393135076549	ENSG00000092445;ENSG00000104951;ENSG00000106123;ENSG00000124766;ENSG00000129654;ENSG00000130427;ENSG00000135077;ENSG00000139514;ENSG00000147889;ENSG00000150782;ENSG00000155659;ENSG00000157227;ENSG00000186818;ENSG00000204252;ENSG00000211935;ENSG00000211950;ENSG00000232216;ENSG00000272398
GO:0034637	cellular carbohydrate biosynthetic process	5	90	0.0579533316849969	0.237394017939284	ENSG00000085662;ENSG00000111713;ENSG00000117394;ENSG00000156966;ENSG00000237172
GO:0043086	negative regulation of catalytic activity	26	809	0.0580731753939567	0.237605884135437	ENSG00000011422;ENSG00000088992;ENSG00000089685;ENSG00000100985;ENSG00000101443;ENSG00000105894;ENSG00000109846;ENSG00000116741;ENSG00000118849;ENSG00000123243;ENSG00000124102;ENSG00000130829;ENSG00000135549;ENSG00000147889;ENSG00000154277;ENSG00000163359;ENSG00000164109;ENSG00000164611;ENSG00000166143;ENSG00000166851;ENSG00000171199;ENSG00000175793;ENSG00000181019;ENSG00000186818;ENSG00000221867…
GO:0045576	mast cell activation	4	63	0.0581339532070971	0.237605884135437	ENSG00000092929;ENSG00000100604;ENSG00000104419;ENSG00000145920
GO:1902305	regulation of sodium ion transmembrane transport	4	63	0.0581339532070971	0.237605884135437	ENSG00000069849;ENSG00000088992;ENSG00000089356;ENSG00000137731
GO:0060548	negative regulation of cell death	31	996	0.0582592124506188	0.237941982903931	ENSG00000011422;ENSG00000049130;ENSG00000054598;ENSG00000074800;ENSG00000085662;ENSG00000089685;ENSG00000092445;ENSG00000095970;ENSG00000100604;ENSG00000100985;ENSG00000106541;ENSG00000107984;ENSG00000109846;ENSG00000124766;ENSG00000130427;ENSG00000153071;ENSG00000157613;ENSG00000164109;ENSG00000164379;ENSG00000166851;ENSG00000170312;ENSG00000171310;ENSG00000175793;ENSG00000176170;ENSG00000178999…
GO:0032411	positive regulation of transporter activity	6	119	0.05853973668732	0.23891125009659	ENSG00000005421;ENSG00000069849;ENSG00000075461;ENSG00000088992;ENSG00000095970;ENSG00000137731
GO:0050878	regulation of body fluid levels	18	519	0.0587696381616694	0.239672639405628	ENSG00000011422;ENSG00000051523;ENSG00000054179;ENSG00000077942;ENSG00000085662;ENSG00000092445;ENSG00000096433;ENSG00000106541;ENSG00000109758;ENSG00000117525;ENSG00000122861;ENSG00000124491;ENSG00000153933;ENSG00000158869;ENSG00000159399;ENSG00000164171;ENSG00000175793;ENSG00000204580
GO:0080134	regulation of response to stress	51	1768	0.05914202194163	0.24101354556906	ENSG00000011422;ENSG00000051180;ENSG00000051523;ENSG00000074800;ENSG00000080293;ENSG00000087494;ENSG00000092445;ENSG00000095970;ENSG00000096088;ENSG00000100985;ENSG00000103222;ENSG00000105894;ENSG00000106541;ENSG00000107984;ENSG00000109846;ENSG00000109861;ENSG00000111206;ENSG00000117525;ENSG00000118785;ENSG00000122861;ENSG00000130427;ENSG00000132965;ENSG00000135077;ENSG00000137309;ENSG00000140274…
GO:0006919	activation of cysteine-type endopeptidase activity involved in apoptotic process	5	91	0.0602139110130778	0.244703773591967	ENSG00000117525;ENSG00000129521;ENSG00000143546;ENSG00000147889;ENSG00000163220
GO:0060840	artery development	5	91	0.0602139110130778	0.244703773591967	ENSG00000054598;ENSG00000110195;ENSG00000113083;ENSG00000124766;ENSG00000141756
GO:0070301	cellular response to hydrogen peroxide	5	91	0.0602139110130778	0.244703773591967	ENSG00000114346;ENSG00000170312;ENSG00000176170;ENSG00000181019;ENSG00000183010
GO:0006810	transport	133	5108	0.0602245634464136	0.244703773591967	ENSG00000005059;ENSG00000005421;ENSG00000005448;ENSG00000011028;ENSG00000011422;ENSG00000019505;ENSG00000051523;ENSG00000053918;ENSG00000067225;ENSG00000069849;ENSG00000070087;ENSG00000074410;ENSG00000075218;ENSG00000075461;ENSG00000083807;ENSG00000085491;ENSG00000088992;ENSG00000089356;ENSG00000089685;ENSG00000090889;ENSG00000092068;ENSG00000092445;ENSG00000092929;ENSG00000095970;ENSG00000096433…
GO:0051336	regulation of hydrolase activity	39	1304	0.0602786061834202	0.244743533182315	ENSG00000005001;ENSG00000011422;ENSG00000035499;ENSG00000069849;ENSG00000070087;ENSG00000076864;ENSG00000077782;ENSG00000077942;ENSG00000089685;ENSG00000090104;ENSG00000100985;ENSG00000101443;ENSG00000105894;ENSG00000109846;ENSG00000114346;ENSG00000116741;ENSG00000117525;ENSG00000118849;ENSG00000121152;ENSG00000123243;ENSG00000124102;ENSG00000129521;ENSG00000129654;ENSG00000137731;ENSG00000143546…
GO:0001667	ameboidal-type cell migration	15	415	0.060341265695577	0.24481819464163	ENSG00000005884;ENSG00000011426;ENSG00000049130;ENSG00000070087;ENSG00000077782;ENSG00000100985;ENSG00000102359;ENSG00000105894;ENSG00000110195;ENSG00000132470;ENSG00000153233;ENSG00000163993;ENSG00000164171;ENSG00000181751;ENSG00000184292
GO:0071229	cellular response to acid chemical	9	213	0.0604725721857083	0.244990914436641	ENSG00000041982;ENSG00000051523;ENSG00000087245;ENSG00000088992;ENSG00000110195;ENSG00000112655;ENSG00000134057;ENSG00000155760;ENSG00000165168
GO:0050868	negative regulation of T cell activation	6	120	0.0604789845084684	0.244990914436641	ENSG00000104951;ENSG00000129654;ENSG00000135077;ENSG00000147889;ENSG00000155659;ENSG00000186818
GO:0019953	sexual reproduction	28	887	0.0605167430597561	0.244990914436641	ENSG00000054598;ENSG00000071539;ENSG00000079462;ENSG00000092445;ENSG00000101443;ENSG00000105894;ENSG00000110195;ENSG00000112742;ENSG00000116741;ENSG00000122133;ENSG00000124102;ENSG00000128242;ENSG00000129654;ENSG00000131747;ENSG00000134057;ENSG00000136943;ENSG00000137819;ENSG00000145685;ENSG00000149925;ENSG00000154040;ENSG00000157456;ENSG00000161800;ENSG00000164611;ENSG00000166851;ENSG00000170312…
GO:0006909	phagocytosis	14	381	0.0610586801223491	0.246891117961558	ENSG00000051523;ENSG00000092445;ENSG00000092929;ENSG00000095970;ENSG00000116701;ENSG00000143226;ENSG00000158869;ENSG00000164171;ENSG00000169896;ENSG00000176170;ENSG00000203747;ENSG00000211935;ENSG00000211950;ENSG00000232216
GO:0046825	regulation of protein export from nucleus	3	39	0.061075415799532	0.246891117961558	ENSG00000075218;ENSG00000147889;ENSG00000175793
GO:0002237	response to molecule of bacterial origin	13	347	0.0614797713653675	0.247677754010747	ENSG00000095970;ENSG00000130427;ENSG00000135077;ENSG00000140505;ENSG00000143546;ENSG00000148344;ENSG00000150782;ENSG00000163220;ENSG00000163735;ENSG00000163739;ENSG00000169429;ENSG00000182195;ENSG00000272398
GO:0009411	response to UV	7	151	0.0620456818880934	0.247677754010747	ENSG00000087245;ENSG00000100985;ENSG00000105894;ENSG00000164045;ENSG00000168078;ENSG00000178999;ENSG00000196611
GO:0021700	developmental maturation	11	280	0.062256872470699	0.247677754010747	ENSG00000071539;ENSG00000085662;ENSG00000087245;ENSG00000091129;ENSG00000117399;ENSG00000122133;ENSG00000130427;ENSG00000134057;ENSG00000154040;ENSG00000160211;ENSG00000178882
GO:0008637	apoptotic mitochondrial changes	6	121	0.0624560432820295	0.247677754010747	ENSG00000011422;ENSG00000100985;ENSG00000147889;ENSG00000159399;ENSG00000175793;ENSG00000214253
GO:0071560	cellular response to transforming growth factor beta stimulus	10	247	0.062466889395613	0.247677754010747	ENSG00000005884;ENSG00000110195;ENSG00000113083;ENSG00000122176;ENSG00000124225;ENSG00000133110;ENSG00000153071;ENSG00000168743;ENSG00000170801;ENSG00000171310
GO:0031396	regulation of protein ubiquitination	9	215	0.0633603583333807	0.247677754010747	ENSG00000046774;ENSG00000117399;ENSG00000124766;ENSG00000147889;ENSG00000164109;ENSG00000166851;ENSG00000172425;ENSG00000175063;ENSG00000176170
GO:0048738	cardiac muscle tissue development	9	215	0.0633603583333807	0.247677754010747	ENSG00000046604;ENSG00000054598;ENSG00000107984;ENSG00000116741;ENSG00000134057;ENSG00000155760;ENSG00000160211;ENSG00000170312;ENSG00000178860
GO:0045619	regulation of lymphocyte differentiation	8	183	0.0633832564250531	0.247677754010747	ENSG00000104951;ENSG00000124766;ENSG00000129654;ENSG00000147889;ENSG00000150782;ENSG00000157227;ENSG00000186818;ENSG00000204252
GO:0072593	reactive oxygen species metabolic process	11	281	0.0635179045617915	0.247677754010747	ENSG00000051523;ENSG00000109846;ENSG00000111206;ENSG00000116701;ENSG00000140274;ENSG00000140505;ENSG00000159399;ENSG00000160211;ENSG00000165168;ENSG00000169896;ENSG00000181019
GO:0046824	positive regulation of nucleocytoplasmic transport	4	65	0.0637903807998818	0.247677754010747	ENSG00000075218;ENSG00000114346;ENSG00000170312;ENSG00000175793
GO:0048844	artery morphogenesis	4	65	0.0637903807998818	0.247677754010747	ENSG00000054598;ENSG00000110195;ENSG00000124766;ENSG00000141756
GO:0050766	positive regulation of phagocytosis	4	65	0.0637903807998818	0.247677754010747	ENSG00000051523;ENSG00000095970;ENSG00000158869;ENSG00000164171
GO:0060389	pathway-restricted SMAD protein phosphorylation	4	65	0.0637903807998818	0.247677754010747	ENSG00000107984;ENSG00000112742;ENSG00000124225;ENSG00000153071
GO:0000077	DNA damage checkpoint	7	152	0.0638147984986607	0.247677754010747	ENSG00000075218;ENSG00000124766;ENSG00000134057;ENSG00000166851;ENSG00000170312;ENSG00000175793;ENSG00000185499
GO:0051592	response to calcium ion	7	152	0.0638147984986607	0.247677754010747	ENSG00000019505;ENSG00000085491;ENSG00000096433;ENSG00000114346;ENSG00000132965;ENSG00000145708;ENSG00000148344
GO:0002281	macrophage activation involved in immune response	2	18	0.064156110683015	0.247677754010747	ENSG00000095970;ENSG00000135077
GO:0010744	positive regulation of macrophage derived foam cell differentiation	2	18	0.064156110683015	0.247677754010747	ENSG00000150782;ENSG00000179593
GO:0036148	phosphatidylglycerol acyl-chain remodeling	2	18	0.064156110683015	0.247677754010747	ENSG00000153395;ENSG00000176454
GO:0040037	negative regulation of fibroblast growth factor receptor signaling pathway	2	18	0.064156110683015	0.247677754010747	ENSG00000137573;ENSG00000157613
GO:0042772	DNA damage response, signal transduction resulting in transcription	2	18	0.064156110683015	0.247677754010747	ENSG00000111206;ENSG00000185499
GO:0044849	estrous cycle	2	18	0.064156110683015	0.247677754010747	ENSG00000105894;ENSG00000137673
GO:0045591	positive regulation of regulatory T cell differentiation	2	18	0.064156110683015	0.247677754010747	ENSG00000104951;ENSG00000186818
GO:0061050	regulation of cell growth involved in cardiac muscle cell development	2	18	0.064156110683015	0.247677754010747	ENSG00000116741;ENSG00000160211
GO:0097501	stress response to metal ion	2	18	0.064156110683015	0.247677754010747	ENSG00000169715;ENSG00000187193
GO:0098962	regulation of postsynaptic neurotransmitter receptor activity	2	18	0.064156110683015	0.247677754010747	ENSG00000075461;ENSG00000106236
GO:1902683	regulation of receptor localization to synapse	2	18	0.064156110683015	0.247677754010747	ENSG00000076716;ENSG00000113758
GO:2000258	negative regulation of protein activation cascade	2	18	0.064156110683015	0.247677754010747	ENSG00000117525;ENSG00000155659
GO:0042110	T cell activation	17	490	0.0647657182331667	0.247677754010747	ENSG00000102034;ENSG00000104951;ENSG00000106123;ENSG00000124766;ENSG00000129654;ENSG00000130427;ENSG00000135077;ENSG00000139514;ENSG00000147889;ENSG00000150782;ENSG00000155659;ENSG00000155760;ENSG00000158869;ENSG00000173762;ENSG00000186818;ENSG00000204252;ENSG00000272398
GO:0001657	ureteric bud development	5	93	0.0648836243980706	0.247677754010747	ENSG00000054598;ENSG00000129654;ENSG00000168743;ENSG00000184292;ENSG00000260027
GO:0014037	Schwann cell differentiation	3	40	0.0649381295687623	0.247677754010747	ENSG00000104419;ENSG00000132470;ENSG00000170312
GO:0014911	positive regulation of smooth muscle cell migration	3	40	0.0649381295687623	0.247677754010747	ENSG00000133110;ENSG00000163191;ENSG00000164171
GO:0071470	cellular response to osmotic stress	3	40	0.0649381295687623	0.247677754010747	ENSG00000085662;ENSG00000117394;ENSG00000130427
GO:0071634	regulation of transforming growth factor beta production	3	40	0.0649381295687623	0.247677754010747	ENSG00000077942;ENSG00000104341;ENSG00000272398
GO:0090224	regulation of spindle organization	3	40	0.0649381295687623	0.247677754010747	ENSG00000013810;ENSG00000088325;ENSG00000166851
GO:1901186	positive regulation of ERBB signaling pathway	3	40	0.0649381295687623	0.247677754010747	ENSG00000011422;ENSG00000100985;ENSG00000106541
GO:0006936	muscle contraction	13	351	0.0660104112530036	0.247677754010747	ENSG00000046604;ENSG00000053918;ENSG00000074800;ENSG00000100604;ENSG00000109846;ENSG00000116741;ENSG00000137573;ENSG00000138119;ENSG00000149925;ENSG00000164171;ENSG00000168743;ENSG00000175084;ENSG00000176170
GO:0009612	response to mechanical stimulus	9	217	0.066334407879067	0.247677754010747	ENSG00000041982;ENSG00000051523;ENSG00000105894;ENSG00000117394;ENSG00000133110;ENSG00000134057;ENSG00000137673;ENSG00000157227;ENSG00000164171
GO:0010822	positive regulation of mitochondrion organization	6	123	0.066523620870839	0.247677754010747	ENSG00000011422;ENSG00000095970;ENSG00000100985;ENSG00000159399;ENSG00000175793;ENSG00000214253
GO:0031109	microtubule polymerization or depolymerization	6	123	0.066523620870839	0.247677754010747	ENSG00000088325;ENSG00000104435;ENSG00000109846;ENSG00000142945;ENSG00000154839;ENSG00000186185
GO:0010469	regulation of signaling receptor activity	8	185	0.0666371110022278	0.247677754010747	ENSG00000075461;ENSG00000106236;ENSG00000107984;ENSG00000122861;ENSG00000145708;ENSG00000150551;ENSG00000186818;ENSG00000269028
GO:0032270	positive regulation of cellular protein metabolic process	47	1627	0.0670775333922558	0.247677754010747	ENSG00000005001;ENSG00000011422;ENSG00000046774;ENSG00000049130;ENSG00000067225;ENSG00000070087;ENSG00000074800;ENSG00000077782;ENSG00000077942;ENSG00000088325;ENSG00000094804;ENSG00000095970;ENSG00000100985;ENSG00000107984;ENSG00000109861;ENSG00000112742;ENSG00000114346;ENSG00000117399;ENSG00000117525;ENSG00000124766;ENSG00000128342;ENSG00000128422;ENSG00000129521;ENSG00000130427;ENSG00000130829…
GO:0048010	vascular endothelial growth factor receptor signaling pathway	5	94	0.067292540307453	0.247677754010747	ENSG00000051523;ENSG00000054598;ENSG00000116701;ENSG00000137573;ENSG00000165168
GO:0072163	mesonephric epithelium development	5	94	0.067292540307453	0.247677754010747	ENSG00000054598;ENSG00000129654;ENSG00000168743;ENSG00000184292;ENSG00000260027
GO:0072164	mesonephric tubule development	5	94	0.067292540307453	0.247677754010747	ENSG00000054598;ENSG00000129654;ENSG00000168743;ENSG00000184292;ENSG00000260027
GO:0045580	regulation of T cell differentiation	7	154	0.0674442712082257	0.247677754010747	ENSG00000104951;ENSG00000124766;ENSG00000129654;ENSG00000147889;ENSG00000150782;ENSG00000186818;ENSG00000204252
GO:0051250	negative regulation of lymphocyte activation	7	154	0.0674442712082257	0.247677754010747	ENSG00000092445;ENSG00000104951;ENSG00000129654;ENSG00000135077;ENSG00000147889;ENSG00000155659;ENSG00000186818
GO:0001649	osteoblast differentiation	9	218	0.067853902950448	0.247677754010747	ENSG00000011028;ENSG00000038427;ENSG00000041982;ENSG00000087494;ENSG00000113083;ENSG00000118785;ENSG00000157613;ENSG00000164932;ENSG00000168743
GO:0050870	positive regulation of T cell activation	9	218	0.067853902950448	0.247677754010747	ENSG00000104951;ENSG00000106123;ENSG00000124766;ENSG00000130427;ENSG00000135077;ENSG00000139514;ENSG00000150782;ENSG00000186818;ENSG00000272398
GO:0001705	ectoderm formation	1	3	0.0678986392550258	0.247677754010747	ENSG00000155760
GO:0002019	regulation of renal output by angiotensin	1	3	0.0678986392550258	0.247677754010747	ENSG00000051523
GO:0002514	B cell tolerance induction	1	3	0.0678986392550258	0.247677754010747	ENSG00000129654
GO:0002519	natural killer cell tolerance induction	1	3	0.0678986392550258	0.247677754010747	ENSG00000135077
GO:0002538	arachidonic acid metabolite production involved in inflammatory response	1	3	0.0678986392550258	0.247677754010747	ENSG00000132965
GO:0002540	leukotriene production involved in inflammatory response	1	3	0.0678986392550258	0.247677754010747	ENSG00000132965
GO:0002541	activation of plasma proteins involved in acute inflammatory response	1	3	0.0678986392550258	0.247677754010747	ENSG00000117525
GO:0002581	negative regulation of antigen processing and presentation of peptide or polysaccharide antigen via MHC class II	1	3	0.0678986392550258	0.247677754010747	ENSG00000204252
GO:0002652	regulation of tolerance induction dependent upon immune response	1	3	0.0678986392550258	0.247677754010747	ENSG00000135077
GO:0002774	Fc receptor mediated inhibitory signaling pathway	1	3	0.0678986392550258	0.247677754010747	ENSG00000186818
GO:0003275	apoptotic process involved in outflow tract morphogenesis	1	3	0.0678986392550258	0.247677754010747	ENSG00000054598
GO:0005988	lactose metabolic process	1	3	0.0678986392550258	0.247677754010747	ENSG00000117394
GO:0005989	lactose biosynthetic process	1	3	0.0678986392550258	0.247677754010747	ENSG00000117394
GO:0006059	hexitol metabolic process	1	3	0.0678986392550258	0.247677754010747	ENSG00000085662
GO:0006598	polyamine catabolic process	1	3	0.0678986392550258	0.247677754010747	ENSG00000088826
GO:0006740	NADPH regeneration	1	3	0.0678986392550258	0.247677754010747	ENSG00000160211
GO:0007057	spindle assembly involved in female meiosis I	1	3	0.0678986392550258	0.247677754010747	ENSG00000157456
GO:0007181	transforming growth factor beta receptor complex assembly	1	3	0.0678986392550258	0.247677754010747	ENSG00000122176
GO:0007412	axon target recognition	1	3	0.0678986392550258	0.247677754010747	ENSG00000154277
GO:0009850	auxin metabolic process	1	3	0.0678986392550258	0.247677754010747	ENSG00000104951
GO:0010481	epidermal cell division	1	3	0.0678986392550258	0.247677754010747	ENSG00000175793
GO:0010482	regulation of epidermal cell division	1	3	0.0678986392550258	0.247677754010747	ENSG00000175793
GO:0010610	regulation of mRNA stability involved in response to stress	1	3	0.0678986392550258	0.247677754010747	ENSG00000159217
GO:0010643	cell communication by chemical coupling	1	3	0.0678986392550258	0.247677754010747	ENSG00000113758
GO:0010983	positive regulation of high-density lipoprotein particle clearance	1	3	0.0678986392550258	0.247677754010747	ENSG00000095970
GO:0018894	dibenzo-p-dioxin metabolic process	1	3	0.0678986392550258	0.247677754010747	ENSG00000140505
GO:0030451	regulation of complement activation, alternative pathway	1	3	0.0678986392550258	0.247677754010747	ENSG00000155659
GO:0030886	negative regulation of myeloid dendritic cell activation	1	3	0.0678986392550258	0.247677754010747	ENSG00000135077
GO:0030997	regulation of centriole-centriole cohesion	1	3	0.0678986392550258	0.247677754010747	ENSG00000117650
GO:0032290	peripheral nervous system myelin formation	1	3	0.0678986392550258	0.247677754010747	ENSG00000132470
GO:0032461	positive regulation of protein oligomerization	1	3	0.0678986392550258	0.247677754010747	ENSG00000167972
GO:0032462	regulation of protein homooligomerization	1	3	0.0678986392550258	0.247677754010747	ENSG00000167972
GO:0032954	regulation of cytokinetic process	1	3	0.0678986392550258	0.247677754010747	ENSG00000114346
GO:0033023	mast cell homeostasis	1	3	0.0678986392550258	0.247677754010747	ENSG00000049130
GO:0033366	protein localization to secretory granule	1	3	0.0678986392550258	0.247677754010747	ENSG00000100604
GO:0034441	plasma lipoprotein particle oxidation	1	3	0.0678986392550258	0.247677754010747	ENSG00000146070
GO:0035938	estradiol secretion	1	3	0.0678986392550258	0.247677754010747	ENSG00000118785
GO:0042662	negative regulation of mesodermal cell fate specification	1	3	0.0678986392550258	0.247677754010747	ENSG00000107984
GO:0043974	histone H3-K27 acetylation	1	3	0.0678986392550258	0.247677754010747	ENSG00000128342
GO:0043988	histone H3-S28 phosphorylation	1	3	0.0678986392550258	0.247677754010747	ENSG00000178999
GO:0045583	regulation of cytotoxic T cell differentiation	1	3	0.0678986392550258	0.247677754010747	ENSG00000186818
GO:0045957	negative regulation of complement activation, alternative pathway	1	3	0.0678986392550258	0.247677754010747	ENSG00000155659
GO:0051595	response to methylglyoxal	1	3	0.0678986392550258	0.247677754010747	ENSG00000085662
GO:0051598	meiotic recombination checkpoint	1	3	0.0678986392550258	0.247677754010747	ENSG00000071539
GO:0060221	retinal rod cell differentiation	1	3	0.0678986392550258	0.247677754010747	ENSG00000105894
GO:0060447	bud outgrowth involved in lung branching	1	3	0.0678986392550258	0.247677754010747	ENSG00000041982
GO:0061110	dense core granule biogenesis	1	3	0.0678986392550258	0.247677754010747	ENSG00000100604
GO:0061141	lung ciliated cell differentiation	1	3	0.0678986392550258	0.247677754010747	ENSG00000129654
GO:0061218	negative regulation of mesonephros development	1	3	0.0678986392550258	0.247677754010747	ENSG00000184292
GO:0061713	anterior neural tube closure	1	3	0.0678986392550258	0.247677754010747	ENSG00000110195
GO:0070101	positive regulation of chemokine-mediated signaling pathway	1	3	0.0678986392550258	0.247677754010747	ENSG00000095970
GO:0071373	cellular response to luteinizing hormone stimulus	1	3	0.0678986392550258	0.247677754010747	ENSG00000145386
GO:0071659	negative regulation of IP-10 production	1	3	0.0678986392550258	0.247677754010747	ENSG00000186818
GO:0072061	inner medullary collecting duct development	1	3	0.0678986392550258	0.247677754010747	ENSG00000085662
GO:0090402	oncogene-induced cell senescence	1	3	0.0678986392550258	0.247677754010747	ENSG00000137309
GO:0097195	pilomotor reflex	1	3	0.0678986392550258	0.247677754010747	ENSG00000168743
GO:0097213	regulation of lysosomal membrane permeability	1	3	0.0678986392550258	0.247677754010747	ENSG00000104341
GO:0110030	regulation of G2/MI transition of meiotic cell cycle	1	3	0.0678986392550258	0.247677754010747	ENSG00000164045
GO:0110032	positive regulation of G2/MI transition of meiotic cell cycle	1	3	0.0678986392550258	0.247677754010747	ENSG00000164045
GO:0150064	vertebrate eye-specific patterning	1	3	0.0678986392550258	0.247677754010747	ENSG00000169896
GO:1901074	regulation of engulfment of apoptotic cell	1	3	0.0678986392550258	0.247677754010747	ENSG00000095970
GO:1901079	positive regulation of relaxation of muscle	1	3	0.0678986392550258	0.247677754010747	ENSG00000100604
GO:1901491	negative regulation of lymphangiogenesis	1	3	0.0678986392550258	0.247677754010747	ENSG00000054598
GO:1901674	regulation of histone H3-K27 acetylation	1	3	0.0678986392550258	0.247677754010747	ENSG00000128342
GO:1902103	negative regulation of metaphase/anaphase transition of meiotic cell cycle	1	3	0.0678986392550258	0.247677754010747	ENSG00000112742
GO:1902256	regulation of apoptotic process involved in outflow tract morphogenesis	1	3	0.0678986392550258	0.247677754010747	ENSG00000054598
GO:1902423	regulation of attachment of mitotic spindle microtubules to kinetochore	1	3	0.0678986392550258	0.247677754010747	ENSG00000178999
GO:1902425	positive regulation of attachment of mitotic spindle microtubules to kinetochore	1	3	0.0678986392550258	0.247677754010747	ENSG00000178999
GO:1902490	regulation of sperm capacitation	1	3	0.0678986392550258	0.247677754010747	ENSG00000122133
GO:1903406	regulation of sodium:potassium-exchanging ATPase activity	1	3	0.0678986392550258	0.247677754010747	ENSG00000137731
GO:1903408	positive regulation of sodium:potassium-exchanging ATPase activity	1	3	0.0678986392550258	0.247677754010747	ENSG00000137731
GO:1904116	response to vasopressin	1	3	0.0678986392550258	0.247677754010747	ENSG00000094804
GO:1904117	cellular response to vasopressin	1	3	0.0678986392550258	0.247677754010747	ENSG00000094804
GO:1904235	regulation of substrate-dependent cell migration, cell attachment to substrate	1	3	0.0678986392550258	0.247677754010747	ENSG00000077942
GO:1904237	positive regulation of substrate-dependent cell migration, cell attachment to substrate	1	3	0.0678986392550258	0.247677754010747	ENSG00000077942
GO:1904273	L-alanine import across plasma membrane	1	3	0.0678986392550258	0.247677754010747	ENSG00000092068
GO:1904351	negative regulation of protein catabolic process in the vacuole	1	3	0.0678986392550258	0.247677754010747	ENSG00000104341
GO:1904395	positive regulation of skeletal muscle acetylcholine-gated channel clustering	1	3	0.0678986392550258	0.247677754010747	ENSG00000105894
GO:1904425	negative regulation of GTP binding	1	3	0.0678986392550258	0.247677754010747	ENSG00000076864
GO:1904578	response to thapsigargin	1	3	0.0678986392550258	0.247677754010747	ENSG00000214253
GO:1904579	cellular response to thapsigargin	1	3	0.0678986392550258	0.247677754010747	ENSG00000214253
GO:1904880	response to hydrogen sulfide	1	3	0.0678986392550258	0.247677754010747	ENSG00000181019
GO:1905133	negative regulation of meiotic chromosome separation	1	3	0.0678986392550258	0.247677754010747	ENSG00000112742
GO:1905166	negative regulation of lysosomal protein catabolic process	1	3	0.0678986392550258	0.247677754010747	ENSG00000104341
GO:1905289	regulation of CAMKK-AMPK signaling cascade	1	3	0.0678986392550258	0.247677754010747	ENSG00000095970
GO:1905463	negative regulation of DNA duplex unwinding	1	3	0.0678986392550258	0.247677754010747	ENSG00000131747
GO:1905581	positive regulation of low-density lipoprotein particle clearance	1	3	0.0678986392550258	0.247677754010747	ENSG00000095970
GO:1905771	negative regulation of mesodermal cell differentiation	1	3	0.0678986392550258	0.247677754010747	ENSG00000107984
GO:1905784	regulation of anaphase-promoting complex-dependent catabolic process	1	3	0.0678986392550258	0.247677754010747	ENSG00000117399
GO:1905786	positive regulation of anaphase-promoting complex-dependent catabolic process	1	3	0.0678986392550258	0.247677754010747	ENSG00000117399
GO:1905903	negative regulation of mesoderm formation	1	3	0.0678986392550258	0.247677754010747	ENSG00000107984
GO:2000111	positive regulation of macrophage apoptotic process	1	3	0.0678986392550258	0.247677754010747	ENSG00000147889
GO:2000361	regulation of prostaglandin-E synthase activity	1	3	0.0678986392550258	0.247677754010747	ENSG00000169896
GO:2000363	positive regulation of prostaglandin-E synthase activity	1	3	0.0678986392550258	0.247677754010747	ENSG00000169896
GO:2000520	regulation of immunological synapse formation	1	3	0.0678986392550258	0.247677754010747	ENSG00000135077
GO:2000524	negative regulation of T cell costimulation	1	3	0.0678986392550258	0.247677754010747	ENSG00000186818
GO:2000525	positive regulation of T cell costimulation	1	3	0.0678986392550258	0.247677754010747	ENSG00000106123
GO:2000705	regulation of dense core granule biogenesis	1	3	0.0678986392550258	0.247677754010747	ENSG00000100604
GO:2000864	regulation of estradiol secretion	1	3	0.0678986392550258	0.247677754010747	ENSG00000118785
GO:2001303	lipoxin A4 biosynthetic process	1	3	0.0678986392550258	0.247677754010747	ENSG00000179593
GO:0006629	lipid metabolic process	42	1434	0.06822595312819	0.248707660381602	ENSG00000005421;ENSG00000021461;ENSG00000076716;ENSG00000079462;ENSG00000083807;ENSG00000085662;ENSG00000106258;ENSG00000114113;ENSG00000118785;ENSG00000121316;ENSG00000128242;ENSG00000130649;ENSG00000132965;ENSG00000136840;ENSG00000139547;ENSG00000140505;ENSG00000141934;ENSG00000143320;ENSG00000144959;ENSG00000146070;ENSG00000147852;ENSG00000148344;ENSG00000151365;ENSG00000153395;ENSG00000153933…
GO:0071621	granulocyte chemotaxis	6	124	0.0686141159162551	0.249793325225076	ENSG00000143546;ENSG00000158869;ENSG00000163220;ENSG00000163735;ENSG00000163739;ENSG00000169429
GO:1903578	regulation of ATP metabolic process	6	124	0.0686141159162551	0.249793325225076	ENSG00000074800;ENSG00000095970;ENSG00000134057;ENSG00000170312;ENSG00000170525;ENSG00000214253
GO:0009072	aromatic amino acid family metabolic process	3	41	0.0689104348657439	0.250213200792885	ENSG00000104951;ENSG00000162174;ENSG00000172425
GO:0045823	positive regulation of heart contraction	3	41	0.0689104348657439	0.250213200792885	ENSG00000053918;ENSG00000100604;ENSG00000116741
GO:0050892	intestinal absorption	3	41	0.0689104348657439	0.250213200792885	ENSG00000053918;ENSG00000140297;ENSG00000166391
GO:0071312	cellular response to alkaloid	3	41	0.0689104348657439	0.250213200792885	ENSG00000051180;ENSG00000145386;ENSG00000145708
GO:0043588	skin development	15	424	0.0697180157241792	0.252400767777784	ENSG00000005884;ENSG00000046604;ENSG00000054598;ENSG00000124102;ENSG00000128422;ENSG00000132470;ENSG00000136943;ENSG00000164171;ENSG00000164379;ENSG00000167767;ENSG00000171345;ENSG00000175793;ENSG00000175832;ENSG00000179593;ENSG00000221926
GO:0006026	aminoglycan catabolic process	4	67	0.0697244893742558	0.252400767777784	ENSG00000038427;ENSG00000076716;ENSG00000122176;ENSG00000133063
GO:0033260	nuclear DNA replication	4	67	0.0697244893742558	0.252400767777784	ENSG00000051180;ENSG00000093009;ENSG00000101003;ENSG00000167513
GO:0045824	negative regulation of innate immune response	4	67	0.0697244893742558	0.252400767777784	ENSG00000092445;ENSG00000135077;ENSG00000155659;ENSG00000262406
GO:0009966	regulation of signal transduction	86	3195	0.0697411163046028	0.252400767777784	ENSG00000005448;ENSG00000005884;ENSG00000011422;ENSG00000035499;ENSG00000049130;ENSG00000051523;ENSG00000074800;ENSG00000075461;ENSG00000076716;ENSG00000076864;ENSG00000077782;ENSG00000077942;ENSG00000080293;ENSG00000085662;ENSG00000088325;ENSG00000090104;ENSG00000092445;ENSG00000095970;ENSG00000100604;ENSG00000100985;ENSG00000106236;ENSG00000106541;ENSG00000107984;ENSG00000109861;ENSG00000110195…
GO:0001696	gastric acid secretion	2	19	0.0706363326140236	0.25430919228877	ENSG00000053918;ENSG00000160181
GO:0002834	regulation of response to tumor cell	2	19	0.0706363326140236	0.25430919228877	ENSG00000104951;ENSG00000135077
GO:0002837	regulation of immune response to tumor cell	2	19	0.0706363326140236	0.25430919228877	ENSG00000104951;ENSG00000135077
GO:0007039	protein catabolic process in the vacuole	2	19	0.0706363326140236	0.25430919228877	ENSG00000104341;ENSG00000158516
GO:0032930	positive regulation of superoxide anion generation	2	19	0.0706363326140236	0.25430919228877	ENSG00000051523;ENSG00000169896
GO:0045091	regulation of single stranded viral RNA replication via double stranded DNA intermediate	2	19	0.0706363326140236	0.25430919228877	ENSG00000131747;ENSG00000169429
GO:0048670	regulation of collateral sprouting	2	19	0.0706363326140236	0.25430919228877	ENSG00000118785;ENSG00000143320
GO:1900016	negative regulation of cytokine production involved in inflammatory response	2	19	0.0706363326140236	0.25430919228877	ENSG00000181751;ENSG00000186818
GO:0006911	phagocytosis, engulfment	6	125	0.0707423745771748	0.25441324385872	ENSG00000095970;ENSG00000164171;ENSG00000169896;ENSG00000211935;ENSG00000211950;ENSG00000232216
GO:1902532	negative regulation of intracellular signal transduction	18	532	0.0707572457603455	0.25441324385872	ENSG00000005884;ENSG00000011422;ENSG00000074800;ENSG00000077942;ENSG00000100985;ENSG00000111206;ENSG00000116741;ENSG00000120057;ENSG00000128342;ENSG00000130427;ENSG00000130829;ENSG00000153233;ENSG00000154277;ENSG00000157613;ENSG00000168078;ENSG00000185499;ENSG00000186818;ENSG00000221867
GO:0071559	response to transforming growth factor beta	10	253	0.0708711414476832	0.254657187917926	ENSG00000005884;ENSG00000110195;ENSG00000113083;ENSG00000122176;ENSG00000124225;ENSG00000133110;ENSG00000153071;ENSG00000168743;ENSG00000170801;ENSG00000171310
GO:0070997	neuron death	13	356	0.0719775187198814	0.258464726312301	ENSG00000089685;ENSG00000092445;ENSG00000100604;ENSG00000101057;ENSG00000107984;ENSG00000129521;ENSG00000130427;ENSG00000160211;ENSG00000164379;ENSG00000169896;ENSG00000175344;ENSG00000181019;ENSG00000214253
GO:0050764	regulation of phagocytosis	5	96	0.0722577551437852	0.258966549543183	ENSG00000051523;ENSG00000095970;ENSG00000158869;ENSG00000164171;ENSG00000176170
GO:0097194	execution phase of apoptosis	5	96	0.0722577551437852	0.258966549543183	ENSG00000131747;ENSG00000147889;ENSG00000163687;ENSG00000187288;ENSG00000269028
GO:1901216	positive regulation of neuron death	5	96	0.0722577551437852	0.258966549543183	ENSG00000101057;ENSG00000107984;ENSG00000169896;ENSG00000181019;ENSG00000214253
GO:0050920	regulation of chemotaxis	9	221	0.0725427427482122	0.25960630833433	ENSG00000077782;ENSG00000095970;ENSG00000105894;ENSG00000117525;ENSG00000137285;ENSG00000146070;ENSG00000158747;ENSG00000164171;ENSG00000169429
GO:0000904	cell morphogenesis involved in differentiation	24	754	0.072593896917873	0.25960630833433	ENSG00000058085;ENSG00000076864;ENSG00000077942;ENSG00000091129;ENSG00000091136;ENSG00000092445;ENSG00000092929;ENSG00000102837;ENSG00000105894;ENSG00000112655;ENSG00000113758;ENSG00000118785;ENSG00000124429;ENSG00000133110;ENSG00000137285;ENSG00000143320;ENSG00000147852;ENSG00000154277;ENSG00000155760;ENSG00000159217;ENSG00000169862;ENSG00000175344;ENSG00000184292;ENSG00000187688
GO:0007568	aging	12	322	0.0726323739027508	0.25960630833433	ENSG00000107984;ENSG00000109846;ENSG00000109861;ENSG00000111206;ENSG00000130427;ENSG00000136943;ENSG00000137309;ENSG00000137673;ENSG00000147889;ENSG00000170312;ENSG00000178999;ENSG00000181019
GO:0048638	regulation of developmental growth	12	322	0.0726323739027508	0.25960630833433	ENSG00000054598;ENSG00000091129;ENSG00000106541;ENSG00000113758;ENSG00000116741;ENSG00000118785;ENSG00000130829;ENSG00000134057;ENSG00000143320;ENSG00000160211;ENSG00000170312;ENSG00000187688
GO:0014910	regulation of smooth muscle cell migration	4	68	0.0727943440238534	0.25960630833433	ENSG00000122861;ENSG00000133110;ENSG00000163191;ENSG00000164171
GO:0046888	negative regulation of hormone secretion	4	68	0.0727943440238534	0.25960630833433	ENSG00000100604;ENSG00000128342;ENSG00000145708;ENSG00000197696
GO:0072091	regulation of stem cell proliferation	4	68	0.0727943440238534	0.25960630833433	ENSG00000049130;ENSG00000077942;ENSG00000105173;ENSG00000105894
GO:2000146	negative regulation of cell motility	11	288	0.0728118235491042	0.25960630833433	ENSG00000070087;ENSG00000077942;ENSG00000105894;ENSG00000137573;ENSG00000139146;ENSG00000151882;ENSG00000153233;ENSG00000158747;ENSG00000179593;ENSG00000181751;ENSG00000184292
GO:0003014	renal system process	6	126	0.0729083480802687	0.259739895056661	ENSG00000005884;ENSG00000051523;ENSG00000053918;ENSG00000085662;ENSG00000137573;ENSG00000157483
GO:0050832	defense response to fungus	3	42	0.0729901983576945	0.259739895056661	ENSG00000100604;ENSG00000143546;ENSG00000163220
GO:0071604	transforming growth factor beta production	3	42	0.0729901983576945	0.259739895056661	ENSG00000077942;ENSG00000104341;ENSG00000272398
GO:0001817	regulation of cytokine production	24	757	0.0751317247003574	0.267188705847573	ENSG00000051523;ENSG00000077942;ENSG00000095970;ENSG00000104341;ENSG00000117525;ENSG00000122133;ENSG00000129654;ENSG00000133110;ENSG00000135077;ENSG00000135245;ENSG00000137573;ENSG00000150782;ENSG00000155659;ENSG00000158869;ENSG00000159217;ENSG00000165168;ENSG00000175344;ENSG00000176170;ENSG00000179593;ENSG00000181751;ENSG00000186818;ENSG00000221926;ENSG00000262406;ENSG00000272398
GO:0032722	positive regulation of chemokine production	4	69	0.0759319325396354	0.26951449739678	ENSG00000133110;ENSG00000135077;ENSG00000150782;ENSG00000179593
GO:0043268	positive regulation of potassium ion transport	4	69	0.0759319325396354	0.26951449739678	ENSG00000053918;ENSG00000069849;ENSG00000095970;ENSG00000137731
GO:0071300	cellular response to retinoic acid	4	69	0.0759319325396354	0.26951449739678	ENSG00000041982;ENSG00000088992;ENSG00000112655;ENSG00000155760
GO:0010243	response to organonitrogen compound	31	1023	0.0766158378460457	0.271512567548889	ENSG00000051180;ENSG00000051523;ENSG00000053918;ENSG00000067225;ENSG00000075461;ENSG00000085662;ENSG00000087245;ENSG00000094804;ENSG00000095970;ENSG00000100985;ENSG00000103222;ENSG00000105894;ENSG00000110195;ENSG00000113739;ENSG00000116741;ENSG00000117394;ENSG00000130649;ENSG00000145386;ENSG00000145708;ENSG00000158869;ENSG00000160182;ENSG00000164171;ENSG00000165168;ENSG00000170312;ENSG00000175344…
GO:0051093	negative regulation of developmental process	30	985	0.0766894036414846	0.271512567548889	ENSG00000054598;ENSG00000076864;ENSG00000077942;ENSG00000087494;ENSG00000100985;ENSG00000104435;ENSG00000105894;ENSG00000107984;ENSG00000109861;ENSG00000111206;ENSG00000116741;ENSG00000118785;ENSG00000120057;ENSG00000122133;ENSG00000123095;ENSG00000124664;ENSG00000129654;ENSG00000133110;ENSG00000137573;ENSG00000139146;ENSG00000147889;ENSG00000150782;ENSG00000155760;ENSG00000157613;ENSG00000160211…
GO:0002449	lymphocyte mediated immunity	13	360	0.0769969302719456	0.271512567548889	ENSG00000092929;ENSG00000104951;ENSG00000106123;ENSG00000109861;ENSG00000129654;ENSG00000135077;ENSG00000150782;ENSG00000158869;ENSG00000174371;ENSG00000186818;ENSG00000211935;ENSG00000211950;ENSG00000232216
GO:0007276	gamete generation	23	722	0.0770747506355475	0.271512567548889	ENSG00000054598;ENSG00000071539;ENSG00000079462;ENSG00000092445;ENSG00000101443;ENSG00000105894;ENSG00000112742;ENSG00000116741;ENSG00000122133;ENSG00000128242;ENSG00000129654;ENSG00000131747;ENSG00000134057;ENSG00000136943;ENSG00000137819;ENSG00000154040;ENSG00000157456;ENSG00000161800;ENSG00000164611;ENSG00000166851;ENSG00000170627;ENSG00000237649;ENSG00000244405
GO:0032715	negative regulation of interleukin-6 production	3	43	0.0771752114964786	0.271512567548889	ENSG00000129654;ENSG00000135077;ENSG00000186818
GO:0034080	CENP-A containing nucleosome assembly	3	43	0.0771752114964786	0.271512567548889	ENSG00000100162;ENSG00000115163;ENSG00000123485
GO:0061641	CENP-A containing chromatin organization	3	43	0.0771752114964786	0.271512567548889	ENSG00000100162;ENSG00000115163;ENSG00000123485
GO:0006044	N-acetylglucosamine metabolic process	2	20	0.077318721252069	0.271512567548889	ENSG00000140835;ENSG00000175040
GO:0035357	peroxisome proliferator activated receptor signaling pathway	2	20	0.077318721252069	0.271512567548889	ENSG00000164687;ENSG00000179593
GO:0036120	cellular response to platelet-derived growth factor stimulus	2	20	0.077318721252069	0.271512567548889	ENSG00000105894;ENSG00000145386
GO:0039692	single stranded viral RNA replication via double stranded DNA intermediate	2	20	0.077318721252069	0.271512567548889	ENSG00000131747;ENSG00000169429
GO:0046716	muscle cell cellular homeostasis	2	20	0.077318721252069	0.271512567548889	ENSG00000113083;ENSG00000149925
GO:0046827	positive regulation of protein export from nucleus	2	20	0.077318721252069	0.271512567548889	ENSG00000075218;ENSG00000175793
GO:0051444	negative regulation of ubiquitin-protein transferase activity	2	20	0.077318721252069	0.271512567548889	ENSG00000147889;ENSG00000164109
GO:0060231	mesenchymal to epithelial transition	2	20	0.077318721252069	0.271512567548889	ENSG00000128342;ENSG00000155760
GO:1902236	negative regulation of endoplasmic reticulum stress-induced intrinsic apoptotic signaling pathway	2	20	0.077318721252069	0.271512567548889	ENSG00000157613;ENSG00000221867
GO:0001823	mesonephros development	5	98	0.0774182123269414	0.271512567548889	ENSG00000054598;ENSG00000129654;ENSG00000168743;ENSG00000184292;ENSG00000260027
GO:0045185	maintenance of protein location	5	98	0.0774182123269414	0.271512567548889	ENSG00000034510;ENSG00000112559;ENSG00000113758;ENSG00000158747;ENSG00000159399
GO:0008037	cell recognition	9	224	0.0774277249592401	0.271512567548889	ENSG00000038427;ENSG00000091129;ENSG00000110195;ENSG00000122133;ENSG00000135077;ENSG00000149925;ENSG00000211935;ENSG00000211950;ENSG00000232216
GO:0032409	regulation of transporter activity	11	292	0.0784925891243811	0.275072254662755	ENSG00000005421;ENSG00000053918;ENSG00000069849;ENSG00000075461;ENSG00000088992;ENSG00000089356;ENSG00000095970;ENSG00000100985;ENSG00000130427;ENSG00000137731;ENSG00000145708
GO:0048588	developmental cell growth	9	225	0.0790997320125891	0.27702439393896	ENSG00000091129;ENSG00000113758;ENSG00000116741;ENSG00000118785;ENSG00000133110;ENSG00000143320;ENSG00000160211;ENSG00000187688;ENSG00000204580
GO:0001816	cytokine production	24	762	0.0794952845720071	0.278233496002025	ENSG00000051523;ENSG00000077942;ENSG00000095970;ENSG00000104341;ENSG00000117525;ENSG00000122133;ENSG00000129654;ENSG00000133110;ENSG00000135077;ENSG00000135245;ENSG00000137573;ENSG00000150782;ENSG00000155659;ENSG00000158869;ENSG00000159217;ENSG00000165168;ENSG00000175344;ENSG00000176170;ENSG00000179593;ENSG00000181751;ENSG00000186818;ENSG00000221926;ENSG00000262406;ENSG00000272398
GO:0009725	response to hormone	31	1028	0.0804125540852363	0.281265922891434	ENSG00000005884;ENSG00000041982;ENSG00000051523;ENSG00000067225;ENSG00000085662;ENSG00000094804;ENSG00000105894;ENSG00000107159;ENSG00000109846;ENSG00000113083;ENSG00000113739;ENSG00000117394;ENSG00000118785;ENSG00000124225;ENSG00000130427;ENSG00000133110;ENSG00000136943;ENSG00000140505;ENSG00000145386;ENSG00000145708;ENSG00000150551;ENSG00000153071;ENSG00000157227;ENSG00000160182;ENSG00000164171…
GO:0006631	fatty acid metabolic process	14	398	0.080634796337085	0.281806215825001	ENSG00000005421;ENSG00000083807;ENSG00000085662;ENSG00000130649;ENSG00000132965;ENSG00000140505;ENSG00000148344;ENSG00000160868;ENSG00000164181;ENSG00000164687;ENSG00000167600;ENSG00000179593;ENSG00000197838;ENSG00000198077
GO:1904018	positive regulation of vasculature development	8	193	0.0806689402623829	0.281806215825001	ENSG00000067225;ENSG00000102359;ENSG00000117525;ENSG00000159399;ENSG00000165168;ENSG00000169429;ENSG00000175344;ENSG00000176170
GO:0051251	positive regulation of lymphocyte activation	13	363	0.0809059888251527	0.282455882703974	ENSG00000104951;ENSG00000106123;ENSG00000124766;ENSG00000130427;ENSG00000135077;ENSG00000139514;ENSG00000150782;ENSG00000157227;ENSG00000186818;ENSG00000211935;ENSG00000211950;ENSG00000232216;ENSG00000272398
GO:0010631	epithelial cell migration	11	294	0.0814345922295207	0.283684813348513	ENSG00000005884;ENSG00000011426;ENSG00000070087;ENSG00000077782;ENSG00000100985;ENSG00000102359;ENSG00000105894;ENSG00000153233;ENSG00000163993;ENSG00000164171;ENSG00000184292
GO:0017145	stem cell division	3	44	0.0814631977572223	0.283684813348513	ENSG00000147889;ENSG00000155760;ENSG00000244405
GO:0097178	ruffle assembly	3	44	0.0814631977572223	0.283684813348513	ENSG00000070087;ENSG00000184292;ENSG00000198758
GO:1901985	positive regulation of protein acetylation	3	44	0.0814631977572223	0.283684813348513	ENSG00000124766;ENSG00000128342;ENSG00000185499
GO:0001736	establishment of planar polarity	6	130	0.0819479090942498	0.285013797038492	ENSG00000076716;ENSG00000107984;ENSG00000112655;ENSG00000153071;ENSG00000155760;ENSG00000164932
GO:0007164	establishment of tissue polarity	6	130	0.0819479090942498	0.285013797038492	ENSG00000076716;ENSG00000107984;ENSG00000112655;ENSG00000153071;ENSG00000155760;ENSG00000164932
GO:0010721	negative regulation of cell development	12	329	0.0821290947891054	0.285285109411905	ENSG00000076864;ENSG00000077942;ENSG00000087494;ENSG00000104435;ENSG00000105894;ENSG00000116741;ENSG00000118785;ENSG00000122133;ENSG00000133110;ENSG00000160211;ENSG00000178882;ENSG00000184292
GO:0032496	response to lipopolysaccharide	12	329	0.0821290947891054	0.285285109411905	ENSG00000095970;ENSG00000130427;ENSG00000135077;ENSG00000140505;ENSG00000143546;ENSG00000148344;ENSG00000150782;ENSG00000163220;ENSG00000163735;ENSG00000163739;ENSG00000169429;ENSG00000182195
GO:0044786	cell cycle DNA replication	4	71	0.0824076567744926	0.285893564594068	ENSG00000051180;ENSG00000093009;ENSG00000101003;ENSG00000167513
GO:0071479	cellular response to ionizing radiation	4	71	0.0824076567744926	0.285893564594068	ENSG00000051180;ENSG00000051523;ENSG00000109846;ENSG00000114346
GO:0002460	adaptive immune response based on somatic recombination of immune receptors built from immunoglobulin superfamily domains	13	365	0.0835811612732169	0.286898152824742	ENSG00000092929;ENSG00000104951;ENSG00000106123;ENSG00000109861;ENSG00000129654;ENSG00000135077;ENSG00000150782;ENSG00000158869;ENSG00000174371;ENSG00000186818;ENSG00000211935;ENSG00000211950;ENSG00000232216
GO:0002577	regulation of antigen processing and presentation	2	21	0.0841904862721954	0.286898152824742	ENSG00000095970;ENSG00000204252
GO:0006883	cellular sodium ion homeostasis	2	21	0.0841904862721954	0.286898152824742	ENSG00000069849;ENSG00000160183
GO:0007398	ectoderm development	2	21	0.0841904862721954	0.286898152824742	ENSG00000155760;ENSG00000169896
GO:0030277	maintenance of gastrointestinal epithelium	2	21	0.0841904862721954	0.286898152824742	ENSG00000160181;ENSG00000160182
GO:0036119	response to platelet-derived growth factor	2	21	0.0841904862721954	0.286898152824742	ENSG00000105894;ENSG00000145386
GO:0042402	cellular biogenic amine catabolic process	2	21	0.0841904862721954	0.286898152824742	ENSG00000088826;ENSG00000104951
GO:0007018	microtubule-based movement	11	296	0.084444531432878	0.286898152824742	ENSG00000090889;ENSG00000112984;ENSG00000126787;ENSG00000137807;ENSG00000138160;ENSG00000142945;ENSG00000154040;ENSG00000154277;ENSG00000161800;ENSG00000186185;ENSG00000237649
GO:0031341	regulation of cell killing	5	101	0.0855208160206096	0.286898152824742	ENSG00000051523;ENSG00000135077;ENSG00000155760;ENSG00000163687;ENSG00000169896
GO:0042102	positive regulation of T cell proliferation	5	101	0.0855208160206096	0.286898152824742	ENSG00000130427;ENSG00000135077;ENSG00000139514;ENSG00000150782;ENSG00000272398
GO:0098869	cellular oxidant detoxification	5	101	0.0855208160206096	0.286898152824742	ENSG00000132965;ENSG00000148344;ENSG00000163220;ENSG00000164294;ENSG00000181019
GO:1905954	positive regulation of lipid localization	5	101	0.0855208160206096	0.286898152824742	ENSG00000005421;ENSG00000118785;ENSG00000135245;ENSG00000148344;ENSG00000167972
GO:0043066	negative regulation of apoptotic process	27	882	0.0856426809899881	0.286898152824742	ENSG00000011422;ENSG00000049130;ENSG00000054598;ENSG00000074800;ENSG00000085662;ENSG00000089685;ENSG00000092445;ENSG00000095970;ENSG00000100985;ENSG00000107984;ENSG00000109846;ENSG00000130427;ENSG00000153071;ENSG00000157613;ENSG00000164109;ENSG00000164379;ENSG00000166851;ENSG00000170312;ENSG00000171310;ENSG00000175793;ENSG00000176170;ENSG00000178999;ENSG00000181019;ENSG00000185499;ENSG00000185686…
GO:1903779	regulation of cardiac conduction	4	72	0.0857443646971657	0.286898152824742	ENSG00000069849;ENSG00000089356;ENSG00000096433;ENSG00000137731
GO:0010799	regulation of peptidyl-threonine phosphorylation	3	45	0.0858518195237453	0.286898152824742	ENSG00000166851;ENSG00000172425;ENSG00000176170
GO:0030850	prostate gland development	3	45	0.0858518195237453	0.286898152824742	ENSG00000041982;ENSG00000137573;ENSG00000179593
GO:0045494	photoreceptor cell maintenance	3	45	0.0858518195237453	0.286898152824742	ENSG00000006611;ENSG00000007062;ENSG00000117394
GO:2001258	negative regulation of cation channel activity	3	45	0.0858518195237453	0.286898152824742	ENSG00000053918;ENSG00000100985;ENSG00000130427
GO:0090132	epithelium migration	11	297	0.0859750061210578	0.286898152824742	ENSG00000005884;ENSG00000011426;ENSG00000070087;ENSG00000077782;ENSG00000100985;ENSG00000102359;ENSG00000105894;ENSG00000153233;ENSG00000163993;ENSG00000164171;ENSG00000184292
GO:0010632	regulation of epithelial cell migration	9	229	0.0860063461580589	0.286898152824742	ENSG00000005884;ENSG00000070087;ENSG00000077782;ENSG00000100985;ENSG00000102359;ENSG00000105894;ENSG00000153233;ENSG00000164171;ENSG00000184292
GO:0003012	muscle system process	15	438	0.0861475564286998	0.286898152824742	ENSG00000046604;ENSG00000051523;ENSG00000053918;ENSG00000074800;ENSG00000100604;ENSG00000109846;ENSG00000116741;ENSG00000137573;ENSG00000138119;ENSG00000149925;ENSG00000160211;ENSG00000164171;ENSG00000168743;ENSG00000175084;ENSG00000176170
GO:0035637	multicellular organismal signaling	8	196	0.0863507650650044	0.286898152824742	ENSG00000046604;ENSG00000053918;ENSG00000069849;ENSG00000075461;ENSG00000089356;ENSG00000096433;ENSG00000137731;ENSG00000164171
GO:0034329	cell junction assembly	10	263	0.0863988684408474	0.286898152824742	ENSG00000058085;ENSG00000075618;ENSG00000114346;ENSG00000124429;ENSG00000128591;ENSG00000132470;ENSG00000134873;ENSG00000157227;ENSG00000164171;ENSG00000169862
GO:0010952	positive regulation of peptidase activity	8	197	0.0882954921613452	0.286898152824742	ENSG00000005001;ENSG00000077942;ENSG00000117525;ENSG00000129521;ENSG00000143546;ENSG00000147889;ENSG00000163220;ENSG00000214253
GO:0002456	T cell mediated immunity	5	102	0.0883170607545867	0.286898152824742	ENSG00000104951;ENSG00000106123;ENSG00000109861;ENSG00000150782;ENSG00000186818
GO:0006493	protein O-linked glycosylation	5	102	0.0883170607545867	0.286898152824742	ENSG00000136840;ENSG00000140297;ENSG00000140835;ENSG00000156966;ENSG00000185499
GO:0030510	regulation of BMP signaling pathway	5	102	0.0883170607545867	0.286898152824742	ENSG00000005884;ENSG00000120057;ENSG00000137573;ENSG00000158747;ENSG00000170801
GO:0065004	protein-DNA complex assembly	11	299	0.0890869998496397	0.286898152824742	ENSG00000051180;ENSG00000085840;ENSG00000093009;ENSG00000094804;ENSG00000100162;ENSG00000115163;ENSG00000117724;ENSG00000123485;ENSG00000126787;ENSG00000159259;ENSG00000167513
GO:0070373	negative regulation of ERK1 and ERK2 cascade	4	73	0.089145954169105	0.286898152824742	ENSG00000077942;ENSG00000128342;ENSG00000130829;ENSG00000153233
GO:0000730	DNA recombinase assembly	1	4	0.0894935467672117	0.286898152824742	ENSG00000051180
GO:0002282	microglial cell activation involved in immune response	1	4	0.0894935467672117	0.286898152824742	ENSG00000095970
GO:0002528	regulation of vascular permeability involved in acute inflammatory response	1	4	0.0894935467672117	0.286898152824742	ENSG00000198535
GO:0002584	negative regulation of antigen processing and presentation of peptide antigen	1	4	0.0894935467672117	0.286898152824742	ENSG00000204252
GO:0003105	negative regulation of glomerular filtration	1	4	0.0894935467672117	0.286898152824742	ENSG00000051523
GO:0005997	xylulose metabolic process	1	4	0.0894935467672117	0.286898152824742	ENSG00000163931
GO:0006177	GMP biosynthetic process	1	4	0.0894935467672117	0.286898152824742	ENSG00000106348
GO:0006642	triglyceride mobilization	1	4	0.0894935467672117	0.286898152824742	ENSG00000083807
GO:0006931	substrate-dependent cell migration, cell attachment to substrate	1	4	0.0894935467672117	0.286898152824742	ENSG00000077942
GO:0007079	mitotic chromosome movement towards spindle pole	1	4	0.0894935467672117	0.286898152824742	ENSG00000126787
GO:0007089	traversing start control point of mitotic cell cycle	1	4	0.0894935467672117	0.286898152824742	ENSG00000094804
GO:0007598	blood coagulation, extrinsic pathway	1	4	0.0894935467672117	0.286898152824742	ENSG00000117525
GO:0009051	pentose-phosphate shunt, oxidative branch	1	4	0.0894935467672117	0.286898152824742	ENSG00000160211
GO:0010193	response to ozone	1	4	0.0894935467672117	0.286898152824742	ENSG00000130649
GO:0010982	regulation of high-density lipoprotein particle clearance	1	4	0.0894935467672117	0.286898152824742	ENSG00000095970
GO:0014038	regulation of Schwann cell differentiation	1	4	0.0894935467672117	0.286898152824742	ENSG00000170312
GO:0014805	smooth muscle adaptation	1	4	0.0894935467672117	0.286898152824742	ENSG00000051523
GO:0018076	N-terminal peptidyl-lysine acetylation	1	4	0.0894935467672117	0.286898152824742	ENSG00000124766
GO:0019087	transformation of host cell by virus	1	4	0.0894935467672117	0.286898152824742	ENSG00000077942
GO:0030035	microspike assembly	1	4	0.0894935467672117	0.286898152824742	ENSG00000075618
GO:0030951	establishment or maintenance of microtubule cytoskeleton polarity	1	4	0.0894935467672117	0.286898152824742	ENSG00000142945
GO:0031117	positive regulation of microtubule depolymerization	1	4	0.0894935467672117	0.286898152824742	ENSG00000104435
GO:0032053	ciliary basal body organization	1	4	0.0894935467672117	0.286898152824742	ENSG00000129654
GO:0032185	septin cytoskeleton organization	1	4	0.0894935467672117	0.286898152824742	ENSG00000011426
GO:0032417	positive regulation of sodium:proton antiporter activity	1	4	0.0894935467672117	0.286898152824742	ENSG00000088992
GO:0032459	regulation of protein oligomerization	1	4	0.0894935467672117	0.286898152824742	ENSG00000167972
GO:0032497	detection of lipopolysaccharide	1	4	0.0894935467672117	0.286898152824742	ENSG00000095970
GO:0032571	response to vitamin K	1	4	0.0894935467672117	0.286898152824742	ENSG00000133110
GO:0032907	transforming growth factor beta3 production	1	4	0.0894935467672117	0.286898152824742	ENSG00000272398
GO:0032910	regulation of transforming growth factor beta3 production	1	4	0.0894935467672117	0.286898152824742	ENSG00000272398
GO:0034436	glycoprotein transport	1	4	0.0894935467672117	0.286898152824742	ENSG00000147852
GO:0034699	response to luteinizing hormone	1	4	0.0894935467672117	0.286898152824742	ENSG00000145386
GO:0035166	post-embryonic hemopoiesis	1	4	0.0894935467672117	0.286898152824742	ENSG00000157483
GO:0035582	sequestering of BMP in extracellular matrix	1	4	0.0894935467672117	0.286898152824742	ENSG00000158747
GO:0035879	plasma membrane lactate transport	1	4	0.0894935467672117	0.286898152824742	ENSG00000141526
GO:0035910	ascending aorta morphogenesis	1	4	0.0894935467672117	0.286898152824742	ENSG00000124766
GO:0036378	calcitriol biosynthetic process from calciol	1	4	0.0894935467672117	0.286898152824742	ENSG00000160868
GO:0036438	maintenance of lens transparency	1	4	0.0894935467672117	0.286898152824742	ENSG00000054598
GO:0038156	interleukin-3-mediated signaling pathway	1	4	0.0894935467672117	0.286898152824742	ENSG00000158869
GO:0038162	erythropoietin-mediated signaling pathway	1	4	0.0894935467672117	0.286898152824742	ENSG00000130427
GO:0042369	vitamin D catabolic process	1	4	0.0894935467672117	0.286898152824742	ENSG00000160868
GO:0042483	negative regulation of odontogenesis	1	4	0.0894935467672117	0.286898152824742	ENSG00000164761
GO:0043315	positive regulation of neutrophil degranulation	1	4	0.0894935467672117	0.286898152824742	ENSG00000169896
GO:0043987	histone H3-S10 phosphorylation	1	4	0.0894935467672117	0.286898152824742	ENSG00000134057
GO:0044107	cellular alcohol metabolic process	1	4	0.0894935467672117	0.286898152824742	ENSG00000160868
GO:0044108	cellular alcohol biosynthetic process	1	4	0.0894935467672117	0.286898152824742	ENSG00000160868
GO:0044785	metaphase/anaphase transition of meiotic cell cycle	1	4	0.0894935467672117	0.286898152824742	ENSG00000112742
GO:0044878	mitotic cytokinesis checkpoint	1	4	0.0894935467672117	0.286898152824742	ENSG00000178999
GO:0045065	cytotoxic T cell differentiation	1	4	0.0894935467672117	0.286898152824742	ENSG00000186818
GO:0045636	positive regulation of melanocyte differentiation	1	4	0.0894935467672117	0.286898152824742	ENSG00000049130
GO:0045914	negative regulation of catecholamine metabolic process	1	4	0.0894935467672117	0.286898152824742	ENSG00000169896
GO:0045963	negative regulation of dopamine metabolic process	1	4	0.0894935467672117	0.286898152824742	ENSG00000169896
GO:0048133	male germ-line stem cell asymmetric division	1	4	0.0894935467672117	0.286898152824742	ENSG00000244405
GO:0050893	sensory processing	1	4	0.0894935467672117	0.286898152824742	ENSG00000175344
GO:0051142	positive regulation of NK T cell proliferation	1	4	0.0894935467672117	0.286898152824742	ENSG00000150782
GO:0051939	gamma-aminobutyric acid import	1	4	0.0894935467672117	0.286898152824742	ENSG00000131389
GO:0060040	retinal bipolar neuron differentiation	1	4	0.0894935467672117	0.286898152824742	ENSG00000105894
GO:0060309	elastin catabolic process	1	4	0.0894935467672117	0.286898152824742	ENSG00000262406
GO:0060623	regulation of chromosome condensation	1	4	0.0894935467672117	0.286898152824742	ENSG00000134057
GO:0060686	negative regulation of prostatic bud formation	1	4	0.0894935467672117	0.286898152824742	ENSG00000137573
GO:0061317	canonical Wnt signaling pathway involved in cardiac muscle cell fate commitment	1	4	0.0894935467672117	0.286898152824742	ENSG00000107984
GO:0070666	regulation of mast cell proliferation	1	4	0.0894935467672117	0.286898152824742	ENSG00000049130
GO:0071612	IP-10 production	1	4	0.0894935467672117	0.286898152824742	ENSG00000186818
GO:0071658	regulation of IP-10 production	1	4	0.0894935467672117	0.286898152824742	ENSG00000186818
GO:0071798	response to prostaglandin D	1	4	0.0894935467672117	0.286898152824742	ENSG00000041982
GO:0071799	cellular response to prostaglandin D stimulus	1	4	0.0894935467672117	0.286898152824742	ENSG00000041982
GO:0072108	positive regulation of mesenchymal to epithelial transition involved in metanephros morphogenesis	1	4	0.0894935467672117	0.286898152824742	ENSG00000128342
GO:0072757	cellular response to camptothecin	1	4	0.0894935467672117	0.286898152824742	ENSG00000051180
GO:0090082	positive regulation of heart induction by negative regulation of canonical Wnt signaling pathway	1	4	0.0894935467672117	0.286898152824742	ENSG00000107984
GO:0090634	microglial cell mediated cytotoxicity	1	4	0.0894935467672117	0.286898152824742	ENSG00000169896
GO:0090735	DNA repair complex assembly	1	4	0.0894935467672117	0.286898152824742	ENSG00000051180
GO:0110088	hippocampal neuron apoptotic process	1	4	0.0894935467672117	0.286898152824742	ENSG00000169896
GO:0110089	regulation of hippocampal neuron apoptotic process	1	4	0.0894935467672117	0.286898152824742	ENSG00000169896
GO:0140009	L-aspartate import across plasma membrane	1	4	0.0894935467672117	0.286898152824742	ENSG00000105281
GO:1900158	negative regulation of bone mineralization involved in bone maturation	1	4	0.0894935467672117	0.286898152824742	ENSG00000178882
GO:1900738	positive regulation of phospholipase C-activating G protein-coupled receptor signaling pathway	1	4	0.0894935467672117	0.286898152824742	ENSG00000100604
GO:1901994	negative regulation of meiotic cell cycle phase transition	1	4	0.0894935467672117	0.286898152824742	ENSG00000112742
GO:1902102	regulation of metaphase/anaphase transition of meiotic cell cycle	1	4	0.0894935467672117	0.286898152824742	ENSG00000112742
GO:1902565	positive regulation of neutrophil activation	1	4	0.0894935467672117	0.286898152824742	ENSG00000169896
GO:1902685	positive regulation of receptor localization to synapse	1	4	0.0894935467672117	0.286898152824742	ENSG00000113758
GO:1902994	regulation of phospholipid efflux	1	4	0.0894935467672117	0.286898152824742	ENSG00000167972
GO:1902995	positive regulation of phospholipid efflux	1	4	0.0894935467672117	0.286898152824742	ENSG00000167972
GO:1903237	negative regulation of leukocyte tethering or rolling	1	4	0.0894935467672117	0.286898152824742	ENSG00000151882
GO:1903276	regulation of sodium ion export across plasma membrane	1	4	0.0894935467672117	0.286898152824742	ENSG00000069849
GO:1903278	positive regulation of sodium ion export across plasma membrane	1	4	0.0894935467672117	0.286898152824742	ENSG00000069849
GO:1903575	cornified envelope assembly	1	4	0.0894935467672117	0.286898152824742	ENSG00000161249
GO:1903804	glycine import across plasma membrane	1	4	0.0894935467672117	0.286898152824742	ENSG00000116741
GO:1903899	positive regulation of PERK-mediated unfolded protein response	1	4	0.0894935467672117	0.286898152824742	ENSG00000106541
GO:1904016	response to Thyroglobulin triiodothyronine	1	4	0.0894935467672117	0.286898152824742	ENSG00000117394
GO:1904149	regulation of microglial cell mediated cytotoxicity	1	4	0.0894935467672117	0.286898152824742	ENSG00000169896
GO:1904151	positive regulation of microglial cell mediated cytotoxicity	1	4	0.0894935467672117	0.286898152824742	ENSG00000169896
GO:1904557	L-alanine transmembrane transport	1	4	0.0894935467672117	0.286898152824742	ENSG00000092068
GO:1904772	response to tetrachloromethane	1	4	0.0894935467672117	0.286898152824742	ENSG00000181019
GO:1904849	positive regulation of cell chemotaxis to fibroblast growth factor	1	4	0.0894935467672117	0.286898152824742	ENSG00000077782
GO:1905132	regulation of meiotic chromosome separation	1	4	0.0894935467672117	0.286898152824742	ENSG00000112742
GO:1990523	bone regeneration	1	4	0.0894935467672117	0.286898152824742	ENSG00000133110
GO:1990910	response to hypobaric hypoxia	1	4	0.0894935467672117	0.286898152824742	ENSG00000214253
GO:2000097	regulation of smooth muscle cell-matrix adhesion	1	4	0.0894935467672117	0.286898152824742	ENSG00000122861
GO:2000263	regulation of blood coagulation, extrinsic pathway	1	4	0.0894935467672117	0.286898152824742	ENSG00000117525
GO:2000264	negative regulation of blood coagulation, extrinsic pathway	1	4	0.0894935467672117	0.286898152824742	ENSG00000117525
GO:2000546	positive regulation of endothelial cell chemotaxis to fibroblast growth factor	1	4	0.0894935467672117	0.286898152824742	ENSG00000077782
GO:2001302	lipoxin A4 metabolic process	1	4	0.0894935467672117	0.286898152824742	ENSG00000179593
GO:0051100	negative regulation of binding	7	165	0.0895810214995063	0.287012195186715	ENSG00000076864;ENSG00000107984;ENSG00000112559;ENSG00000117650;ENSG00000153071;ENSG00000172425;ENSG00000178999
GO:0046649	lymphocyte activation	24	773	0.0896918034663783	0.287200737214286	ENSG00000092445;ENSG00000092929;ENSG00000102034;ENSG00000104951;ENSG00000106123;ENSG00000124766;ENSG00000129654;ENSG00000130427;ENSG00000135077;ENSG00000139514;ENSG00000147889;ENSG00000150782;ENSG00000155659;ENSG00000155760;ENSG00000157227;ENSG00000158869;ENSG00000173762;ENSG00000174371;ENSG00000186818;ENSG00000204252;ENSG00000211935;ENSG00000211950;ENSG00000232216;ENSG00000272398
GO:0051049	regulation of transport	50	1784	0.0899191410338457	0.287762065924286	ENSG00000005421;ENSG00000005448;ENSG00000019505;ENSG00000051523;ENSG00000053918;ENSG00000069849;ENSG00000070087;ENSG00000075218;ENSG00000075461;ENSG00000088992;ENSG00000089356;ENSG00000089685;ENSG00000092929;ENSG00000095970;ENSG00000096433;ENSG00000100604;ENSG00000100985;ENSG00000107984;ENSG00000109846;ENSG00000114346;ENSG00000116741;ENSG00000117394;ENSG00000118785;ENSG00000124766;ENSG00000128342…
GO:0045596	negative regulation of cell differentiation	23	736	0.0902817834973232	0.288603654551778	ENSG00000076864;ENSG00000077942;ENSG00000087494;ENSG00000100985;ENSG00000104435;ENSG00000105894;ENSG00000107984;ENSG00000116741;ENSG00000118785;ENSG00000122133;ENSG00000123095;ENSG00000124664;ENSG00000129654;ENSG00000133110;ENSG00000139146;ENSG00000147889;ENSG00000150782;ENSG00000155760;ENSG00000160211;ENSG00000178882;ENSG00000184292;ENSG00000185686;ENSG00000186818
GO:0031055	chromatin remodeling at centromere	3	46	0.0903386846345621	0.288603654551778	ENSG00000100162;ENSG00000115163;ENSG00000123485
GO:0045581	negative regulation of T cell differentiation	3	46	0.0903386846345621	0.288603654551778	ENSG00000129654;ENSG00000147889;ENSG00000186818
GO:0014706	striated muscle tissue development	13	370	0.0905119612033814	0.288976765930791	ENSG00000046604;ENSG00000054598;ENSG00000069011;ENSG00000107984;ENSG00000113083;ENSG00000116741;ENSG00000117724;ENSG00000134057;ENSG00000155760;ENSG00000160211;ENSG00000170312;ENSG00000178860;ENSG00000187957
GO:0051247	positive regulation of protein metabolic process	48	1706	0.0908253429457518	0.288976765930791	ENSG00000005001;ENSG00000011422;ENSG00000046774;ENSG00000049130;ENSG00000067225;ENSG00000070087;ENSG00000074800;ENSG00000077782;ENSG00000077942;ENSG00000088325;ENSG00000094804;ENSG00000095970;ENSG00000100985;ENSG00000107984;ENSG00000109861;ENSG00000112742;ENSG00000114346;ENSG00000117399;ENSG00000117525;ENSG00000124766;ENSG00000128342;ENSG00000128422;ENSG00000129521;ENSG00000130427;ENSG00000130829…
GO:0051188	cofactor biosynthetic process	12	335	0.0908640103944862	0.288976765930791	ENSG00000051523;ENSG00000067057;ENSG00000067225;ENSG00000074800;ENSG00000111674;ENSG00000140274;ENSG00000140505;ENSG00000149925;ENSG00000159399;ENSG00000164181;ENSG00000170525;ENSG00000204653
GO:0022600	digestive system process	5	103	0.0911604568523771	0.288976765930791	ENSG00000053918;ENSG00000140297;ENSG00000160181;ENSG00000160182;ENSG00000166391
GO:0002418	immune response to tumor cell	2	22	0.0912393188635012	0.288976765930791	ENSG00000104951;ENSG00000135077
GO:0007063	regulation of sister chromatid cohesion	2	22	0.0912393188635012	0.288976765930791	ENSG00000146670;ENSG00000169679
GO:0009068	aspartate family amino acid catabolic process	2	22	0.0912393188635012	0.288976765930791	ENSG00000162174;ENSG00000175309
GO:0009310	amine catabolic process	2	22	0.0912393188635012	0.288976765930791	ENSG00000088826;ENSG00000104951
GO:0010875	positive regulation of cholesterol efflux	2	22	0.0912393188635012	0.288976765930791	ENSG00000005421;ENSG00000167972
GO:0019682	glyceraldehyde-3-phosphate metabolic process	2	22	0.0912393188635012	0.288976765930791	ENSG00000160211;ENSG00000163931
GO:0032740	positive regulation of interleukin-17 production	2	22	0.0912393188635012	0.288976765930791	ENSG00000150782;ENSG00000176170
GO:0036499	PERK-mediated unfolded protein response	2	22	0.0912393188635012	0.288976765930791	ENSG00000106541;ENSG00000169429
GO:0048143	astrocyte activation	2	22	0.0912393188635012	0.288976765930791	ENSG00000095970;ENSG00000182240
GO:0071305	cellular response to vitamin D	2	22	0.0912393188635012	0.288976765930791	ENSG00000041982;ENSG00000105894
GO:0090189	regulation of branching involved in ureteric bud morphogenesis	2	22	0.0912393188635012	0.288976765930791	ENSG00000184292;ENSG00000260027
GO:0071901	negative regulation of protein serine/threonine kinase activity	6	134	0.0915832862135853	0.289900156131154	ENSG00000116741;ENSG00000130829;ENSG00000135549;ENSG00000147889;ENSG00000154277;ENSG00000166851
GO:0019725	cellular homeostasis	29	966	0.0924305645657441	0.292414772338996	ENSG00000005059;ENSG00000051523;ENSG00000069849;ENSG00000080293;ENSG00000089685;ENSG00000092445;ENSG00000096433;ENSG00000113083;ENSG00000113739;ENSG00000116701;ENSG00000124766;ENSG00000130427;ENSG00000143546;ENSG00000149925;ENSG00000151882;ENSG00000157765;ENSG00000159399;ENSG00000160183;ENSG00000163220;ENSG00000165168;ENSG00000169715;ENSG00000175063;ENSG00000175344;ENSG00000181019;ENSG00000187193…
[truncated: 3,782 more rows]
