# Supplementary material for: Machine learning identifies exosome features related to hepatocellular carcinoma
Source: Front Cell Dev Biol. 2022 Sep 19;10:1020415. doi: 10.3389/fcell.2022.1020415 (PMC9527306; doi:10.3389/fcell.2022.1020415)
Supplement: Supplementary file 1 [file Table2.XLSX]

## Sheet: Sheet1
Exosome-related score genes	PI3K-Akt score genes	NK cell score genes	mitosis score genes	B cell score genes	CD8+T cell score genes
LDHA	CDK4	MICB	BRSK1	CD79A	CD8A
PRDX1	THEM4	ICAM1	CDKN2B	JCHAIN	GZMA
HADHA	CSF1	TMIGD2	GML		TBX21
SFN	CSH1	CD58	KIF2C
UBB	CSH2		RAN
S100A10	EFNA4		TTK
BSG	EGF
LRP4	EIF4E
HSPA8	EPO
CALM1	AKT1
PON1	FGF9
IDH1	FLT3
PRDX6	GH2
	GHR
	GNG4
	GNG5
	GNG7
	ANGPT1
	ANGPT2
	GSK3B
	HRAS
	HSP90AA1
