# Supplementary material for: Machine learning identifies exosome features related to hepatocellular carcinoma
Source: Front Cell Dev Biol. 2022 Sep 19;10:1020415. doi: 10.3389/fcell.2022.1020415 (PMC9527306; doi:10.3389/fcell.2022.1020415)
Supplement: Supplementary file 5 [file Table4.XLSX]

## Sheet: Sheet1
#clustering method	cluster number	cluster color	gene count	protein name	protein identifier	protein description
MCL	1	Red	62	ANLN	9606.ENSP00000265748	Anillin; Required for cytokinesis. Essential for the structural integrity of the cleavage furrow and for completion of cleavage furrow ingression. Plays a role in bleb assembly during metaphase and anaphase of mitosis. May play a significant role in podocyte cell migration; Pleckstrin homology domain containing
MCL	1	Red	62	ARHGAP11A	9606.ENSP00000355090	Rho GTPase activating protein 11A
MCL	1	Red	62	AURKB	9606.ENSP00000313950	Aurora kinase B; Serine/threonine-protein kinase component of the chromosomal passenger complex (CPC), a complex that acts as a key regulator of mitosis. The CPC complex has essential functions at the centromere in ensuring correct chromosome alignment and segregation and is required for chromatin-induced microtubule stabilization and spindle assembly. Involved in the bipolar attachment of spindl…
MCL	1	Red	62	BIRC5	9606.ENSP00000301633	Baculoviral iap repeat-containing protein 5; Baculoviral IAP repeat containing 5
MCL	1	Red	62	BUB1	9606.ENSP00000302530	Mitotic checkpoint serine/threonine-protein kinase BUB1; Serine/threonine-protein kinase that performs 2 crucial functions during mitosis: it is essential for spindle-assembly checkpoint signaling and for correct chromosome alignment. Has a key role in the assembly of checkpoint proteins at the kinetochore, being required for the subsequent localization of CENPF, BUB1B, CENPE and MAD2L1. Required…
MCL	1	Red	62	BUB1B	9606.ENSP00000287598	Mitotic checkpoint serine/threonine-protein kinase BUB1 beta; Essential component of the mitotic checkpoint. Required for normal mitosis progression. The mitotic checkpoint delays anaphase until all chromosomes are properly attached to the mitotic spindle. One of its checkpoint functions is to inhibit the activity of the anaphase-promoting complex/cyclosome (APC/C) by blocking the binding of CDC2…
MCL	1	Red	62	CBX2	9606.ENSP00000308750	Chromobox protein homolog 2; Component of a Polycomb group (PcG) multiprotein PRC1- like complex, a complex class required to maintain the transcriptionally repressive state of many genes, including Hox genes, throughout development. PcG PRC1 complex acts via chromatin remodeling and modification of histones; it mediates monoubiquitination of histone H2A 'Lys-119', rendering chromatin heritably c…
MCL	1	Red	62	CCNA2	9606.ENSP00000274026	Cyclin-A2; Cyclin which controls both the G1/S and the G2/M transition phases of the cell cycle. Functions through the formation of specific serine/threonine protein kinase holoenzyme complexes with the cyclin-dependent protein kinases CDK1 or CDK2. The cyclin subunit confers the substrate specificity of these complexes and differentially interacts with and activates CDK1 and CDK2 throughout the …
MCL	1	Red	62	CCNB1	9606.ENSP00000256442	G2/mitotic-specific cyclin-B1; Essential for the control of the cell cycle at the G2/M (mitosis) transition; Belongs to the cyclin family. Cyclin AB subfamily
MCL	1	Red	62	CCNB2	9606.ENSP00000288207	G2/mitotic-specific cyclin-B2; Essential for the control of the cell cycle at the G2/M (mitosis) transition; Belongs to the cyclin family. Cyclin AB subfamily
MCL	1	Red	62	CCNE1	9606.ENSP00000262643	G1/S-specific cyclin-E1; Essential for the control of the cell cycle at the G1/S (start) transition; Belongs to the cyclin family. Cyclin E subfamily
MCL	1	Red	62	CDC20	9606.ENSP00000361540	Cell division cycle protein 20 homolog; Required for full ubiquitin ligase activity of the anaphase promoting complex/cyclosome (APC/C) and may confer substrate specificity upon the complex. Is regulated by MAD2L1: in metaphase the MAD2L1-CDC20-APC/C ternary complex is inactive and in anaphase the CDC20-APC/C binary complex is active in degrading substrates. The CDC20-APC/C complex positively reg…
MCL	1	Red	62	CDC25A	9606.ENSP00000303706	M-phase inducer phosphatase 1; Tyrosine protein phosphatase which functions as a dosage-dependent inducer of mitotic progression. Directly dephosphorylates CDK1 and stimulates its kinase activity. Also dephosphorylates CDK2 in complex with cyclin E, in vitro; Class III Cys-based CDC25 phosphatases
MCL	1	Red	62	CDC45	9606.ENSP00000405726	Cell division control protein 45 homolog; Required for initiation of chromosomal DNA replication
MCL	1	Red	62	CDCA5	9606.ENSP00000275517	Cell division cycle associated 5; Sororin; Regulator of sister chromatid cohesion in mitosis stabilizing cohesin complex association with chromatin. May antagonize the action of WAPL which stimulates cohesin dissociation from chromatin. Cohesion ensures that chromosome partitioning is accurate in both meiotic and mitotic cells and plays an important role in DNA repair. Required for efficient DNA …
MCL	1	Red	62	CDCA8	9606.ENSP00000362146	Cell division cycle associated 8; Borealin; Component of the chromosomal passenger complex (CPC), a complex that acts as a key regulator of mitosis. The CPC complex has essential functions at the centromere in ensuring correct chromosome alignment and segregation and is required for chromatin-induced microtubule stabilization and spindle assembly. Major effector of the TTK kinase in the control o…
MCL	1	Red	62	CDK1	9606.ENSP00000378699	Cyclin-dependent kinase 1; Plays a key role in the control of the eukaryotic cell cycle by modulating the centrosome cycle as well as mitotic onset; promotes G2-M transition, and regulates G1 progress and G1-S transition via association with multiple interphase cyclins. Required in higher cells for entry into S-phase and mitosis. Phosphorylates PARVA/actopaxin, APC, AMPH, APC, BARD1, Bcl- xL/BCL2…
MCL	1	Red	62	CDKN2A	9606.ENSP00000418915	Cyclin-dependent kinase inhibitor 2A; Acts as a negative regulator of the proliferation of normal cells by interacting strongly with CDK4 and CDK6. This inhibits their ability to interact with cyclins D and to phosphorylate the retinoblastoma protein
MCL	1	Red	62	CENPA	9606.ENSP00000336868	Histone H3-like centromeric protein A; Histone H3-like nucleosomal protein that is specifically found in centromeric nucleosomes. Replaces conventional H3 in the nucleosome core of centromeric chromatin at the inner plate of the kinetochore. The presence of CENPA subtly modifies the nucleosome structure and the way DNA is wrapped around the nucleosome and gives rise to protruding DNA ends that ar…
MCL	1	Red	62	CENPF	9606.ENSP00000355922	Centromere protein F; Required for kinetochore function and chromosome segregation in mitosis. Required for kinetochore localization of dynein, LIS1, NDE1 and NDEL1. Regulates recycling of the plasma membrane by acting as a link between recycling vesicles and the microtubule network though its association with STX4 and SNAP25. Acts as a potential inhibitor of pocket protein-mediated cellular proc…
MCL	1	Red	62	CENPM	9606.ENSP00000215980	Centromere protein M; Component of the CENPA-NAC (nucleosome-associated) complex, a complex that plays a central role in assembly of kinetochore proteins, mitotic progression and chromosome segregation. The CENPA-NAC complex recruits the CENPA-CAD (nucleosome distal) complex and may be involved in incorporation of newly synthesized CENPA into centromeres
MCL	1	Red	62	CEP55	9606.ENSP00000360540	Centrosomal protein of 55 kDa; Plays a role in mitotic exit and cytokinesis. Recruits PDCD6IP and TSG101 to midbody during cytokinesis. Required for successful completion of cytokinesis. Not required for microtubule nucleation. Plays a role in the development of the brain and kidney
MCL	1	Red	62	DES	9606.ENSP00000363071	Desmin; Muscle-specific type III intermediate filament essential for proper muscular structure and function. Plays a crucial role in maintaining the structure of sarcomeres, inter-connecting the Z-disks and forming the myofibrils, linking them not only to the sarcolemmal cytoskeleton, but also to the nucleus and mitochondria, thus providing strength for the muscle fiber during activity. In adult …
MCL	1	Red	62	DLGAP5	9606.ENSP00000247191	Disks large-associated protein 5; Potential cell cycle regulator that may play a role in carcinogenesis of cancer cells. Mitotic phosphoprotein regulated by the ubiquitin-proteasome pathway. Key regulator of adherens junction integrity and differentiation that may be involved in CDH1-mediated adhesion and signaling in epithelial cells
MCL	1	Red	62	ECT2	9606.ENSP00000376457	Protein ECT2; Guanine nucleotide exchange factor (GEF) that catalyzes the exchange of GDP for GTP. Promotes guanine nucleotide exchange on the Rho family members of small GTPases, like RHOA, RHOC, RAC1 and CDC42. Required for signal transduction pathways involved in the regulation of cytokinesis. Component of the centralspindlin complex that serves as a microtubule-dependent and Rho-mediated sign…
MCL	1	Red	62	EXO1	9606.ENSP00000355506	Exonuclease 1; 5'->3' double-stranded DNA exonuclease which may also possess a cryptic 3'->5' double-stranded DNA exonuclease activity. Functions in DNA mismatch repair (MMR) to excise mismatch- containing DNA tracts directed by strand breaks located either 5' or 3' to the mismatch. Also exhibits endonuclease activity against 5'-overhanging flap structures similar to those generated by displaceme…
MCL	1	Red	62	FOXM1	9606.ENSP00000342307	Forkhead box protein M1; Transcriptional factor regulating the expression of cell cycle genes essential for DNA replication and mitosis. Plays a role in the control of cell proliferation. Plays also a role in DNA breaks repair participating in the DNA damage checkpoint response; Forkhead boxes
MCL	1	Red	62	GINS1	9606.ENSP00000262460	DNA replication complex GINS protein PSF1; The GINS complex plays an essential role in the initiation of DNA replication, and progression of DNA replication forks. GINS complex seems to bind preferentially to single- stranded DNA. GINS1 is essential for function
MCL	1	Red	62	GTSE1	9606.ENSP00000415430	G-2 and S-phase expressed protein 1; G2 and S phase-expressed protein 1; May be involved in p53-induced cell cycle arrest in G2/M phase by interfering with microtubule rearrangements that are required to enter mitosis. Overexpression delays G2/M phase progression
MCL	1	Red	62	HJURP	9606.ENSP00000414109	Holliday junction recognition protein; Centromeric protein that plays a central role in the incorporation and maintenance of histone H3-like variant CENPA at centromeres. Acts as a specific chaperone for CENPA and is required for the incorporation of newly synthesized CENPA molecules into nucleosomes at replicated centromeres. Prevents CENPA-H4 tetramerization and prevents premature DNA binding b…
MCL	1	Red	62	KIF11	9606.ENSP00000260731	Kinesin-like protein KIF11; Motor protein required for establishing a bipolar spindle during mitosis. Required in non-mitotic cells for transport of secretory proteins from the Golgi complex to the cell surface; Belongs to the TRAFAC class myosin-kinesin ATPase superfamily. Kinesin family. BimC subfamily
MCL	1	Red	62	KIF18B	9606.ENSP00000465992	Kinesin-like protein KIF18B; In complex with KIF2C, constitutes the major microtubule plus-end depolymerizing activity in mitotic cells. Its major role may be to transport KIF2C and/or MAPRE1 along microtubules; Belongs to the TRAFAC class myosin-kinesin ATPase superfamily. Kinesin family
MCL	1	Red	62	KIF20A	9606.ENSP00000378356	Kinesin-like protein KIF20A; Mitotic kinesin required for chromosome passenger complex (CPC)-mediated cytokinesis. Following phosphorylation by PLK1, involved in recruitment of PLK1 to the central spindle. Interacts with guanosine triphosphate (GTP)-bound forms of RAB6A and RAB6B. May act as a motor required for the retrograde RAB6 regulated transport of Golgi membranes and associated vesicles al…
MCL	1	Red	62	KIF23	9606.ENSP00000260363	Kinesin-like protein KIF23; Component of the centralspindlin complex that serves as a microtubule-dependent and Rho-mediated signaling required for the myosin contractile ring formation during the cell cycle cytokinesis. Essential for cytokinesis in Rho-mediated signaling. Required for the localization of ECT2 to the central spindle. Plus-end-directed motor enzyme that moves antiparallel microtub…
MCL	1	Red	62	KIF2C	9606.ENSP00000361298	Kinesin-like protein KIF2C; In complex with KIF18B, constitutes the major microtubule plus-end depolymerizing activity in mitotic cells. Regulates the turnover of microtubules at the kinetochore and functions in chromosome segregation during mitosis. Plays a role in chromosome congression and is required for the lateral to end-on conversion of the chromosome- microtubule attachment; Belongs to th…
MCL	1	Red	62	KIF4A	9606.ENSP00000363524	Chromosome-associated kinesin KIF4A; Motor protein that translocates PRC1 to the plus ends of interdigitating spindle microtubules during the metaphase to anaphase transition, an essential step for the formation of an organized central spindle midzone and midbody and for successful cytokinesis. May play a role in mitotic chromosomal positioning and bipolar spindle stabilization; Kinesins
MCL	1	Red	62	KIFC1	9606.ENSP00000393963	Kinesin-like protein KIFC1; Minus end-directed microtubule-dependent motor required for bipolar spindle formation. May contribute to movement of early endocytic vesicles (By similarity). Regulates cilium formation and structure (By similarity); Belongs to the TRAFAC class myosin-kinesin ATPase superfamily. Kinesin family. NCD subfamily
MCL	1	Red	62	MAD2L1	9606.ENSP00000296509	Mitotic spindle assembly checkpoint protein MAD2A; Component of the spindle-assembly checkpoint that prevents the onset of anaphase until all chromosomes are properly aligned at the metaphase plate. Required for the execution of the mitotic checkpoint which monitors the process of kinetochore- spindle attachment and inhibits the activity of the anaphase promoting complex by sequestering CDC20 unt…
MCL	1	Red	62	MELK	9606.ENSP00000298048	Maternal embryonic leucine zipper kinase; Serine/threonine-protein kinase involved in various processes such as cell cycle regulation, self-renewal of stem cells, apoptosis and splicing regulation. Has a broad substrate specificity; phosphorylates BCL2L14, CDC25B, MAP3K5/ASK1 and ZNF622. Acts as an activator of apoptosis by phosphorylating and activating MAP3K5/ASK1. Acts as a regulator of cell c…
MCL	1	Red	62	MKI67	9606.ENSP00000357643	Proliferation marker protein Ki-67; Required to maintain individual mitotic chromosomes dispersed in the cytoplasm following nuclear envelope disassembly. Associates with the surface of the mitotic chromosome, the perichromosomal layer, and covers a substantial fraction of the chromosome surface. Prevents chromosomes from collapsing into a single chromatin mass by forming a steric and electrostat…
MCL	1	Red	62	MYBL2	9606.ENSP00000217026	Myb proto-oncogene like 2; Myb-related protein B; Transcription factor involved in the regulation of cell survival, proliferation, and differentiation. Transactivates the expression of the CLU gene; Myb/SANT domain containing
MCL	1	Red	62	NCAPG	9606.ENSP00000251496	Condensin complex subunit 3; Regulatory subunit of the condensin complex, a complex required for conversion of interphase chromatin into mitotic-like condense chromosomes. The condensin complex probably introduces positive supercoils into relaxed DNA in the presence of type I topoisomerases and converts nicked DNA into positive knotted forms in the presence of type II topoisomerases; Armadillo-li…
MCL	1	Red	62	NCAPH	9606.ENSP00000240423	Condensin complex subunit 2; Regulatory subunit of the condensin complex, a complex required for conversion of interphase chromatin into mitotic-like condense chromosomes. The condensin complex probably introduces positive supercoils into relaxed DNA in the presence of type I topoisomerases and converts nicked DNA into positive knotted forms in the presence of type II topoisomerases
MCL	1	Red	62	NDC80	9606.ENSP00000261597	Kinetochore protein NDC80 homolog; Acts as a component of the essential kinetochore- associated NDC80 complex, which is required for chromosome segregation and spindle checkpoint activity. Required for kinetochore integrity and the organization of stable microtubule binding sites in the outer plate of the kinetochore. The NDC80 complex synergistically enhances the affinity of the SKA1 complex for…
MCL	1	Red	62	NEK2	9606.ENSP00000355966	Serine/threonine-protein kinase Nek2; Protein kinase which is involved in the control of centrosome separation and bipolar spindle formation in mitotic cells and chromatin condensation in meiotic cells. Regulates centrosome separation (essential for the formation of bipolar spindles and high-fidelity chromosome separation) by phosphorylating centrosomal proteins such as CROCC, CEP250 and NINL, re…
MCL	1	Red	62	NUF2	9606.ENSP00000271452	Kinetochore protein Nuf2; Acts as a component of the essential kinetochore- associated NDC80 complex, which is required for chromosome segregation and spindle checkpoint activity. Required for kinetochore integrity and the organization of stable microtubule binding sites in the outer plate of the kinetochore. The NDC80 complex synergistically enhances the affinity of the SKA1 complex for microtub…
MCL	1	Red	62	PBK	9606.ENSP00000428489	Lymphokine-activated killer T-cell-originated protein kinase; Phosphorylates MAP kinase p38. Seems to be active only in mitosis. May also play a role in the activation of lymphoid cells. When phosphorylated, forms a complex with TP53, leading to TP53 destabilization and attenuation of G2/M checkpoint during doxorubicin-induced DNA damage; Belongs to the protein kinase superfamily. STE Ser/Thr pro…
MCL	1	Red	62	PLK1	9606.ENSP00000300093	Serine/threonine-protein kinase PLK1; Serine/threonine-protein kinase that performs several important functions throughout M phase of the cell cycle, including the regulation of centrosome maturation and spindle assembly, the removal of cohesins from chromosome arms, the inactivation of anaphase-promoting complex/cyclosome (APC/C) inhibitors, and the regulation of mitotic exit and cytokinesis. Po…
MCL	1	Red	62	PTTG1	9606.ENSP00000377536	Securin; Regulatory protein, which plays a central role in chromosome stability, in the p53/TP53 pathway, and DNA repair. Probably acts by blocking the action of key proteins. During the mitosis, it blocks Separase/ESPL1 function, preventing the proteolysis of the cohesin complex and the subsequent segregation of the chromosomes. At the onset of anaphase, it is ubiquitinated, conducting to its de…
MCL	1	Red	62	RACGAP1	9606.ENSP00000404190	Rac GTPase-activating protein 1; Component of the centralspindlin complex that serves as a microtubule-dependent and Rho-mediated signaling required for the myosin contractile ring formation during the cell cycle cytokinesis. Required for proper attachment of the midbody to the cell membrane during cytokinesis. Plays key roles in controlling cell growth and differentiation of hematopoietic cells …
MCL	1	Red	62	RAD51	9606.ENSP00000372088	DNA repair protein RAD51 homolog 1; Fanconi anemia complementation groups
MCL	1	Red	62	SHCBP1	9606.ENSP00000306473	Shc binding and spindle associated 1; SHC SH2 domain-binding protein 1; May play a role in signaling pathways governing cellular proliferation, cell growth and differentiation. May be a component of a novel signaling pathway downstream of Shc. Acts as a positive regulator of FGF signaling in neural progenitor cells
MCL	1	Red	62	SKA1	9606.ENSP00000285116	Spindle and kinetochore-associated protein 1; Component of the SKA1 complex, a microtubule-binding subcomplex of the outer kinetochore that is essential for proper chromosome segregation. Required for timely anaphase onset during mitosis, when chromosomes undergo bipolar attachment on spindle microtubules leading to silencing of the spindle checkpoint. The SKA1 complex is a direct component of th…
MCL	1	Red	62	SPC25	9606.ENSP00000282074	Kinetochore protein Spc25; Acts as a component of the essential kinetochore- associated NDC80 complex, which is required for chromosome segregation and spindle checkpoint activity. Required for kinetochore integrity and the organization of stable microtubule binding sites in the outer plate of the kinetochore. The NDC80 complex synergistically enhances the affinity of the SKA1 complex for microtu…
MCL	1	Red	62	TACC3	9606.ENSP00000326550	Transforming acidic coiled-coil-containing protein 3; Plays a role in the microtubule-dependent coupling of the nucleus and the centrosome. Involved in the processes that regulate centrosome-mediated interkinetic nuclear migration (INM) of neural progenitors (By similarity). Acts as component of the TACC3/ch-TOG/clathrin complex proposed to contribute to stabilization of kinetochore fibers of the…
MCL	1	Red	62	TOP2A	9606.ENSP00000411532	DNA topoisomerase 2-alpha; Control of topological states of DNA by transient breakage and subsequent rejoining of DNA strands. Topoisomerase II makes double-strand breaks. Essential during mitosis and meiosis for proper segregation of daughter chromosomes. May play a role in regulating the period length of ARNTL/BMAL1 transcriptional oscillation (By similarity); Topoisomerases
MCL	1	Red	62	TPX2	9606.ENSP00000300403	TPX2, microtubule nucleation factor; Targeting protein for Xklp2; Spindle assembly factor required for normal assembly of mitotic spindles. Required for normal assembly of microtubules during apoptosis. Required for chromatin and/or kinetochore dependent microtubule nucleation. Mediates AURKA localization to spindle microtubules. Activates AURKA by promoting its autophosphorylation at 'Thr-288' a…
MCL	1	Red	62	TRIP13	9606.ENSP00000166345	Pachytene checkpoint protein 2 homolog; Plays a key role in chromosome recombination and chromosome structure development during meiosis. Required at early steps in meiotic recombination that leads to non-crossovers pathways. Also needed for efficient completion of homologous synapsis by influencing crossover distribution along the chromosomes affecting both crossovers and non-crossovers pathways…
MCL	1	Red	62	TROAP	9606.ENSP00000257909	Trophinin associated protein; Tastin; Could be involved with bystin and trophinin in a cell adhesion molecule complex that mediates an initial attachment of the blastocyst to uterine epithelial cells at the time of the embryo implantation
MCL	1	Red	62	TTK	9606.ENSP00000358813	Serine/threonine-protein kinase ttk/mps1; Dual specificity protein kinase TTK; Phosphorylates proteins on serine, threonine, and tyrosine. Probably associated with cell proliferation. Essential for chromosome alignment by enhancing AURKB activity (via direct CDCA8 phosphorylation) at the centromere, and for the mitotic checkpoint
MCL	1	Red	62	TUBB2B	9606.ENSP00000259818	Tubulin beta-2B chain; Tubulin is the major constituent of microtubules. It binds two moles of GTP, one at an exchangeable site on the beta chain and one at a non-exchangeable site on the alpha chain (By similarity). Plays a critical role in proper axon guidance in both central and peripheral axon tracts. Implicated in neuronal migration; Tubulins
MCL	1	Red	62	UBE2C	9606.ENSP00000348838	Ubiquitin-conjugating enzyme E2 C; Accepts ubiquitin from the E1 complex and catalyzes its covalent attachment to other proteins. In vitro catalyzes 'Lys- 11'- and 'Lys-48'-linked polyubiquitination. Acts as an essential factor of the anaphase promoting complex/cyclosome (APC/C), a cell cycle-regulated ubiquitin ligase that controls progression through mitosis. Acts by initiating 'Lys-11'-linked …
MCL	2	Salmon	10	ALDOA	9606.ENSP00000378669	Fructose-bisphosphate aldolase A; Plays a key role in glycolysis and gluconeogenesis. In addition, may also function as scaffolding protein (By similarity); Belongs to the class I fructose-bisphosphate aldolase family
MCL	2	Salmon	10	EGLN3	9606.ENSP00000250457	Hypoxia-inducible factor prolyl hydroxylase; Egl nine homolog 3; Cellular oxygen sensor that catalyzes, under normoxic conditions, the post-translational formation of 4-hydroxyproline in hypoxia-inducible factor (HIF) alpha proteins. Hydroxylates a specific proline found in each of the oxygen-dependent degradation (ODD) domains (N-terminal, NODD, and C-terminal, CODD) of HIF1A. Also hydroxylates …
MCL	2	Salmon	10	ENO1	9606.ENSP00000234590	Alpha-enolase; Multifunctional enzyme that, as well as its role in glycolysis, plays a part in various processes such as growth control, hypoxia tolerance and allergic responses. May also function in the intravascular and pericellular fibrinolytic system due to its ability to serve as a receptor and activator of plasminogen on the cell surface of several cell-types such as leukocytes and neurons.…
MCL	2	Salmon	10	ENTPD2	9606.ENSP00000347213	Ectonucleoside triphosphate diphosphohydrolase 2; In the nervous system, could hydrolyze ATP and other nucleotides to regulate purinergic neurotransmission. Hydrolyzes ADP only to a marginal extent. The order of activity with different substrates is ATP > GTP > CTP = ITP > UTP >> ADP = UDP
MCL	2	Salmon	10	G6PD	9606.ENSP00000377192	Glucose-6-phosphate 1-dehydrogenase; Catalyzes the rate-limiting step of the oxidative pentose-phosphate pathway, which represents a route for the dissimilation of carbohydrates besides glycolysis. The main function of this enzyme is to provide reducing power (NADPH) and pentose phosphates for fatty acid and nucleic acid synthesis; Belongs to the glucose-6-phosphate dehydrogenase family
MCL	2	Salmon	10	HK2	9606.ENSP00000290573	Hexokinase-2; Hexokinase 2; Belongs to the hexokinase family
MCL	2	Salmon	10	LDHB	9606.ENSP00000379386	L-lactate dehydrogenase b chain; Lactate dehydrogenase B; Belongs to the LDH/MDH superfamily. LDH family
MCL	2	Salmon	10	PFKP	9606.ENSP00000370517	ATP-dependent 6-phosphofructokinase, platelet type; Catalyzes the phosphorylation of D-fructose 6-phosphate to fructose 1,6-bisphosphate by ATP, the first committing step of glycolysis; Belongs to the phosphofructokinase type A (PFKA) family. ATP-dependent PFK group I subfamily. Eukaryotic two domain clade "E" sub-subfamily
MCL	2	Salmon	10	PKM	9606.ENSP00000320171	Pyruvate kinase m1/2; Pyruvate kinase PKM; Glycolytic enzyme that catalyzes the transfer of a phosphoryl group from phosphoenolpyruvate (PEP) to ADP, generating ATP. Stimulates POU5F1-mediated transcriptional activation. Plays a general role in caspase independent cell death of tumor cells. The ratio between the highly active tetrameric form and nearly inactive dimeric form determines whether glu…
MCL	2	Salmon	10	TKT	9606.ENSP00000391481	Transketolase; Catalyzes the transfer of a two-carbon ketol group from a ketose donor to an aldose acceptor, via a covalent intermediate with the cofactor thiamine pyrophosphate; Belongs to the transketolase family
MCL	3	Fire Brick	5	ITGB4	9606.ENSP00000200181	Integrin subunit beta 4; Integrin beta-4; Integrin alpha-6/beta-4 is a receptor for laminin. Plays a critical structural role in the hemidesmosome of epithelial cells. Is required for the regulation of keratinocyte polarity and motility. ITGA6:ITGB4 binds to NRG1 (via EGF domain) and this binding is essential for NRG1-ERBB signaling. ITGA6:ITGB4 binds to IGF1 and this binding is essential for IGF…
MCL	3	Fire Brick	5	LAMB1	9606.ENSP00000222399	Laminin subunit beta-1; Binding to cells via a high affinity receptor, laminin is thought to mediate the attachment, migration and organization of cells into tissues during embryonic development by interacting with other extracellular matrix components. Involved in the organization of the laminar architecture of cerebral cortex. It is probably required for the integrity of the basement membrane/g…
MCL	3	Fire Brick	5	LAMC2	9606.ENSP00000264144	Laminin subunit gamma-2; Binding to cells via a high affinity receptor, laminin is thought to mediate the attachment, migration and organization of cells into tissues during embryonic development by interacting with other extracellular matrix components. Ladsin exerts cell- scattering activity toward a wide variety of cells, including epithelial, endothelial, and fibroblastic cells
MCL	3	Fire Brick	5	MMP14	9606.ENSP00000308208	Matrix metalloproteinase-14; Endopeptidase that degrades various components of the extracellular matrix such as collagen. Activates progelatinase A. Essential for pericellular collagenolysis and modeling of skeletal and extraskeletal connective tissues during development (By similarity). May be involved in actin cytoskeleton reorganization by cleaving PTK7. Acts as a positive regulator of cell gr…
MCL	3	Fire Brick	5	SFN	9606.ENSP00000340989	14-3-3 protein sigma; Adapter protein implicated in the regulation of a large spectrum of both general and specialized signaling pathways. Binds to a large number of partners, usually by recognition of a phosphoserine or phosphothreonine motif. Binding generally results in the modulation of the activity of the binding partner. When bound to KRT17, regulates protein synthesis and epithelial cell g…
MCL	4	Brown	5	EPHB6	9606.ENSP00000481994	Eph receptor b6; Ephrin type-B receptor 6; Kinase-defective receptor for members of the ephrin-B family. Binds to ephrin-B1 and ephrin-B2. Modulates cell adhesion and migration by exerting both positive and negative effects upon stimulation with ephrin-B2. Inhibits JNK activation, T-cell receptor-induced IL-2 secretion and CD25 expression upon stimulation with ephrin-B2
MCL	4	Brown	5	MMP1	9606.ENSP00000322788	Matrix metalloproteinase-1 (interstitial collagenase); Interstitial collagenase; Cleaves collagens of types I, II, and III at one site in the helical domain. Also cleaves collagens of types VII and X. In case of HIV infection, interacts and cleaves the secreted viral Tat protein, leading to a decrease in neuronal Tat's mediated neurotoxicity; Endogenous ligands
MCL	4	Brown	5	MMP2	9606.ENSP00000219070	Matrix metalloproteinase-2 (gelatinase a); 72 kDa type IV collagenase; Ubiquitinous metalloproteinase that is involved in diverse functions such as remodeling of the vasculature, angiogenesis, tissue repair, tumor invasion, inflammation, and atherosclerotic plaque rupture. As well as degrading extracellular matrix proteins, can also act on several nonmatrix proteins such as big endothelial 1 and …
MCL	4	Brown	5	MMP9	9606.ENSP00000361405	Matrix metalloproteinase-9; May play an essential role in local proteolysis of the extracellular matrix and in leukocyte migration. Could play a role in bone osteoclastic resorption. Cleaves KiSS1 at a Gly-|-Leu bond. Cleaves type IV and type V collagen into large C-terminal three quarter fragments and shorter N-terminal one quarter fragments. Degrades fibronectin but not laminin or Pz-peptide; M…
MCL	4	Brown	5	PRSS3P2	9606.ENSP00000485444	Trypsin-2; In the ileum, may be involved in defensin processing, including DEFA5; Belongs to the peptidase S1 family
MCL	5	Dark Golden Rod 2	5	CYP1A2	9606.ENSP00000342007	Cytochrome p450 family 1 subfamily a polypeptide 2; Cytochrome P450 1A2; Cytochromes P450 are a group of heme-thiolate monooxygenases. In liver microsomes, this enzyme is involved in an NADPH-dependent electron transport pathway. It oxidizes a variety of structurally unrelated compounds, including steroids, fatty acids, and xenobiotics. Most active in catalyzing 2-hydroxylation. Caffeine is metab…
MCL	5	Dark Golden Rod 2	5	CYP2A13	9606.ENSP00000332679	Cytochrome P450 2A13; Exhibits a coumarin 7-hydroxylase activity. Active in the metabolic activation of hexamethylphosphoramide, N,N- dimethylaniline, 2'-methoxyacetophenone, N- nitrosomethylphenylamine, and the tobacco-specific carcinogen, 4- (methylnitrosamino)-1-(3-pyridyl)-1-butanone. Possesses phenacetin O-deethylation activity; Cytochrome P450 family 2
MCL	5	Dark Golden Rod 2	5	CYP2S1	9606.ENSP00000308032	Cytochrome P450 2S1; Has a potential importance for extrahepatic xenobiotic metabolism; Cytochrome P450 family 2
MCL	5	Dark Golden Rod 2	5	CYP3A4	9606.ENSP00000337915	Cytochrome p450 family 3 subfamily a polypeptide 4; Cytochrome P450 3A4; Cytochromes P450 are a group of heme-thiolate monooxygenases. In liver microsomes, this enzyme is involved in an NADPH-dependent electron transport pathway. It performs a variety of oxidation reactions (e.g. caffeine 8-oxidation, omeprazole sulphoxidation, midazolam 1'-hydroxylation and midazolam 4- hydroxylation) of structu…
MCL	5	Dark Golden Rod 2	5	CYP3A5	9606.ENSP00000222982	Cytochrome p450 family 3 subfamily a polypeptide 5; Cytochrome P450 3A5; Cytochromes P450 are a group of heme-thiolate monooxygenases. In liver microsomes, this enzyme is involved in an NADPH-dependent electron transport pathway. It oxidizes a variety of structurally unrelated compounds, including steroids, fatty acids, and xenobiotics
MCL	6	Sandy Brown	5	CTSC	9606.ENSP00000227266	Dipeptidyl peptidase 1; Thiol protease. Has dipeptidylpeptidase activity. Active against a broad range of dipeptide substrates composed of both polar and hydrophobic amino acids. Proline cannot occupy the P1 position and arginine cannot occupy the P2 position of the substrate. Can act as both an exopeptidase and endopeptidase. Activates serine proteases such as elastase, cathepsin G and granzymes…
MCL	6	Sandy Brown	5	CTSE	9606.ENSP00000350911	Cathepsin E; May have a role in immune function. Probably involved in the processing of antigenic peptides during MHC class II-mediated antigen presentation. May play a role in activation-induced lymphocyte depletion in the thymus, and in neuronal degeneration and glial cell activation in the brain; Cathepsins
MCL	6	Sandy Brown	5	CTSV	9606.ENSP00000445052	Cathepsin L2; Cysteine protease. May have an important role in corneal physiology; Belongs to the peptidase C1 family
MCL	6	Sandy Brown	5	HLA-DOA	9606.ENSP00000229829	HLA class II histocompatibility antigen, DO alpha chain; Important modulator in the HLA class II restricted antigen presentation pathway by interaction with the HLA-DM molecule in B-cells. Modifies peptide exchange activity of HLA-DM; C1-set domain containing
MCL	6	Sandy Brown	5	HLA-DQB2	9606.ENSP00000390431	Major histocompatibility complex, class II, DQ beta 2; Belongs to the MHC class II family
MCL	7	Dark Golden Rod	5	B3GNT9	9606.ENSP00000400157	UDP-GlcNAc:betaGal beta-1,3-N-acetylglucosaminyltransferase 9
MCL	7	Dark Golden Rod	5	CHST4	9606.ENSP00000341206	Carbohydrate 6-sulfotransferase 4; Carbohydrate sulfotransferase 4; Sulfotransferase that utilizes 3'-phospho-5'-adenylyl sulfate (PAPS) as sulfonate donor to catalyze the transfer of sulfate to position 6 of non-reducing N-acetylglucosamine (GlcNAc) residues within mucin-associated glycans that ultimately serve as SELL ligands. SELL ligands are present in high endothelial cells (HEVs) and play a…
MCL	7	Dark Golden Rod	5	GCNT3	9606.ENSP00000379377	Beta-1,3-galactosyl-O-glycosyl-glycoprotein beta-1,6-N-acetylglucosaminyltransferase 3; Glycosyltransferase that can synthesize all known mucin beta 6 N-acetylglucosaminides. Mediates core 2 and core 4 O-glycan branching, 2 important steps in mucin-type biosynthesis. Has also I-branching enzyme activity by converting linear into branched poly-N-acetyllactosaminoglycans, leading to introduce the b…
MCL	7	Dark Golden Rod	5	MUC1	9606.ENSP00000484824	Mucin-1; The alpha subunit has cell adhesive properties. Can act both as an adhesion and an anti-adhesion protein. May provide a protective layer on epithelial cells against bacterial and enzyme attack; CD molecules
MCL	7	Dark Golden Rod	5	ST6GALNAC4	9606.ENSP00000336733	ST6 N-acetylgalactosaminide alpha-2,6-sialyltransferase 4; Involved in the biosynthesis of ganglioside GD1A from GM1B. Transfers CMP-NeuAc with an alpha-2,6-linkage to GalNAc residue on NeuAc-alpha-2,3-Gal-beta-1,3-GalNAc of glycoproteins and glycolipids. Prefers glycoproteins to glycolipids (By similarity); Sialyltransferases
MCL	8	Yellow	4	MMP12	9606.ENSP00000458585	Matrix metalloproteinase-12 (macrophage elastase); Macrophage metalloelastase; May be involved in tissue injury and remodeling. Has significant elastolytic activity. Can accept large and small amino acids at the P1' site, but has a preference for leucine. Aromatic or hydrophobic residues are preferred at the P1 site, with small hydrophobic residues (preferably alanine) occupying P3; Belongs to th…
MCL	8	Yellow	4	PLAU	9606.ENSP00000361850	Urokinase-type plasminogen activator; Specifically cleaves the zymogen plasminogen to form the active enzyme plasmin
MCL	8	Yellow	4	PLAUR	9606.ENSP00000339328	Urokinase plasminogen activator surface receptor; Acts as a receptor for urokinase plasminogen activator. Plays a role in localizing and promoting plasmin formation. Mediates the proteolysis-independent signal transduction activation effects of U-PA. It is subject to negative-feedback regulation by U-PA which cleaves it into an inactive form; CD molecules
MCL	8	Yellow	4	SRPX2	9606.ENSP00000362095	Sushi repeat-containing protein SRPX2; Acts as a ligand for the urokinase plasminogen activator surface receptor. Plays a role in angiogenesis by inducing endothelial cell migration and the formation of vascular network (cords). Involved in cellular migration and adhesion. Increases the phosphorylation levels of FAK. Interacts with and increases the mitogenic activity of HGF. Promotes synapse for…
MCL	9	Olive	4	CDC6	9606.ENSP00000209728	Cell division control protein 6 homolog; Involved in the initiation of DNA replication. Also participates in checkpoint controls that ensure DNA replication is completed before mitosis is initiated
MCL	9	Olive	4	CDCA7	9606.ENSP00000306968	Cell division cycle-associated protein 7; Participates in MYC-mediated cell transformation and apoptosis; induces anchorage-independent growth and clonogenicity in lymphoblastoid cells. Insufficient to induce tumorigenicity when overexpressed but contributes to MYC-mediated tumorigenesis. May play a role as transcriptional regulator
MCL	9	Olive	4	CDT1	9606.ENSP00000301019	DNA replication factor Cdt1; Required for both DNA replication and mitosis. DNA replication licensing factor, required for pre-replication complex assembly. Cooperates with CDC6 and the origin recognition complex (ORC) during G1 phase of the cell cycle to promote the loading of the mini-chromosome maintenance (MCM) complex onto DNA to generate pre-replication complexes (pre- RC). Required also fo…
MCL	9	Olive	4	ORC1	9606.ENSP00000360623	Origin recognition complex subunit 1; Component of the origin recognition complex (ORC) that binds origins of replication. DNA-binding is ATP-dependent. The DNA sequences that define origins of replication have not been identified yet. ORC is required to assemble the pre-replication complex necessary to initiate DNA replication; Belongs to the ORC1 family
MCL	10	Khaki	4	CXCL1	9606.ENSP00000379110	Growth-regulated alpha protein; Has chemotactic activity for neutrophils. May play a role in inflammation and exerts its effects on endothelial cells in an autocrine fashion. In vitro, the processed forms GRO- alpha(4-73), GRO-alpha(5-73) and GRO-alpha(6-73) show a 30-fold higher chemotactic activity; Chemokine ligands
MCL	10	Khaki	4	CXCL8	9606.ENSP00000306512	Interleukin-8; IL-8 is a chemotactic factor that attracts neutrophils, basophils, and T-cells, but not monocytes. It is also involved in neutrophil activation. It is released from several cell types in response to an inflammatory stimulus. IL-8(6-77) has a 5-10-fold higher activity on neutrophil activation, IL-8(5-77) has increased activity on neutrophil activation and IL-8(7-77) has a higher aff…
MCL	10	Khaki	4	IL18	9606.ENSP00000280357	Interleukin-18; Augments natural killer cell activity in spleen cells and stimulates interferon gamma production in T-helper type I cells; Belongs to the IL-1 family
MCL	10	Khaki	4	LIF	9606.ENSP00000249075	Lif, interleukin 6 family cytokine; Leukemia inhibitory factor; LIF has the capacity to induce terminal differentiation in leukemic cells. Its activities include the induction of hematopoietic differentiation in normal and myeloid leukemia cells, the induction of neuronal cell differentiation, and the stimulation of acute-phase protein synthesis in hepatocytes; Endogenous ligands
MCL	11	Aquamarine 2	3	COL6A3	9606.ENSP00000295550	Collagen alpha-3(VI) chain; Collagen VI acts as a cell-binding protein; Collagens
MCL	11	Aquamarine 2	3	ITGA2	9606.ENSP00000296585	Integrin alpha-2; Integrin alpha-2/beta-1 is a receptor for laminin, collagen, collagen C-propeptides, fibronectin and E-cadherin. It recognizes the proline-hydroxylated sequence G-F-P-G-E-R in collagen. It is responsible for adhesion of platelets and other cells to collagens, modulation of collagen and collagenase gene expression, force generation and organization of newly synthesized extracellu…
MCL	11	Aquamarine 2	3	TNC	9606.ENSP00000265131	Tenascin; Extracellular matrix protein implicated in guidance of migrating neurons as well as axons during development, synaptic plasticity as well as neuronal regeneration. Promotes neurite outgrowth from cortical neurons grown on a monolayer of astrocytes. Ligand for integrins alpha-8/beta-1, alpha-9/beta-1, alpha-V/beta-3 and alpha-V/beta-6. In tumors, stimulates angiogenesis by elongation, mi…
MCL	12	Cyan	3	AKR1B1	9606.ENSP00000285930	Aldose reductase; Catalyzes the NADPH-dependent reduction of a wide variety of carbonyl-containing compounds to their corresponding alcohols with a broad range of catalytic efficiencies; Belongs to the aldo/keto reductase family
MCL	12	Cyan	3	ALOX15B	9606.ENSP00000369530	Arachidonate 15-lipoxygenase B; Non-heme iron-containing dioxygenase that catalyzes the stereo-specific peroxidation of free and esterified polyunsaturated fatty acids generating a spectrum of bioactive lipid mediators. Converts arachidonic acid to 15S- hydroperoxyeicosatetraenoic acid/(15S)-HPETE. Also acts on linoleic acid to produce 13-hydroxyoctadecadienoic acid/13-HPODE. Has no detectable 8S…
MCL	12	Cyan	3	CYP2E1	9606.ENSP00000440689	Cytochrome P450 2E1; Metabolizes several precarcinogens, drugs, and solvents to reactive metabolites. Inactivates a number of drugs and xenobiotics and also bioactivates many xenobiotic substrates to their hepatotoxic or carcinogenic forms; Cytochrome P450 family 2
MCL	13	Aquamarine	3	CYBA	9606.ENSP00000261623	Cytochrome b-245, alpha polypeptide; Cytochrome b-245 light chain; Critical component of the membrane-bound oxidase of phagocytes that generates superoxide. Associates with NOX3 to form a functional NADPH oxidase constitutively generating superoxide
MCL	13	Aquamarine	3	CYBB	9606.ENSP00000367851	Cytochrome b-245 heavy chain; Critical component of the membrane-bound oxidase of phagocytes that generates superoxide. It is the terminal component of a respiratory chain that transfers single electrons from cytoplasmic NADPH across the plasma membrane to molecular oxygen on the exterior. Also functions as a voltage-gated proton channel that mediates the H(+) currents of resting phagocytes. It p…
MCL	13	Aquamarine	3	NCF2	9606.ENSP00000356505	Neutrophil cytosol factor 2; NCF2, NCF1, and a membrane bound cytochrome b558 are required for activation of the latent NADPH oxidase (necessary for superoxide production); Tetratricopeptide repeat domain containing
MCL	14	Sky Blue 4	3	FBLN1	9606.ENSP00000331544	Fibulin-1; Incorporated into fibronectin-containing matrix fibers. May play a role in cell adhesion and migration along protein fibers within the extracellular matrix (ECM). Could be important for certain developmental processes and contribute to the supramolecular organization of ECM architecture, in particular to those of basement membranes. Has been implicated in a role in cellular transformat…
MCL	14	Sky Blue 4	3	GPC4	9606.ENSP00000359864	Glypican-4; Cell surface proteoglycan that bears heparan sulfate. May be involved in the development of kidney tubules and of the central nervous system (By similarity); Belongs to the glypican family
MCL	14	Sky Blue 4	3	VCAN	9606.ENSP00000265077	Versican core protein; May play a role in intercellular signaling and in connecting cells with the extracellular matrix. May take part in the regulation of cell motility, growth and differentiation. Binds hyaluronic acid; C-type lectin domain containing
MCL	15	Sky Blue 2	3	LPCAT1	9606.ENSP00000283415	Lysophosphatidylcholine acyltransferase / lyso-paf acetyltransferase; Lysophosphatidylcholine acyltransferase 1; Possesses both acyltransferase and acetyltransferase activities. Activity is calcium-independent (By similarity). Mediates the conversion of 1- acyl-sn-glycero-3-phosphocholine (LPC) into phosphatidylcholine (PC). Displays a clear preference for saturated fatty acyl-CoAs, and 1-myristo…
MCL	15	Sky Blue 2	3	LPCAT4	9606.ENSP00000317300	Lysophospholipid acyltransferase LPCAT4; Displays acyl-CoA-dependent lysophospholipid acyltransferase activity with a subset of lysophospholipids as substrates; converts lysophosphatidylethanolamine to phosphatidylethanolamine, lysophosphatidylcholine to phosphatidycholine, 1-alkenyl-lysophatidylethanolamine to 1- alkenyl-phosphatidylethanolamine, lysophosphatidylglycerol and alkyl-lysophosphatid…
MCL	15	Sky Blue 2	3	PLA2G7	9606.ENSP00000274793	Platelet-activating factor acetylhydrolase; Modulates the action of platelet-activating factor (PAF) by hydrolyzing the sn-2 ester bond to yield the biologically inactive lyso-PAF. Has a specificity for substrates with a short residue at the sn-2 position. It is inactive against long-chain phospholipids; Phospholipases
MCL	16	Sky Blue	3	PPAP2C	9606.ENSP00000329697	Phospholipid phosphatase 2; Catalyzes the conversion of phosphatidic acid (PA) to diacylglycerol (DG). In addition it hydrolyzes lysophosphatidic acid (LPA), ceramide-1-phosphate (C-1-P) and sphingosine-1- phosphate (S-1-P). The relative catalytic efficiency is PA > C-1-P > LPA > S-1-P; Belongs to the PA-phosphatase related phosphoesterase family
MCL	16	Sky Blue	3	SGPP2	9606.ENSP00000315137	Sphingosine-1-phosphate phosphotase 2; Sphingosine-1-phosphate phosphatase 2; Has specific phosphohydrolase activity towards sphingoid base 1-phosphates. Has high phosphohydrolase activity against dihydrosphingosine-1-phosphate and sphingosine-1-phosphate (S1P) in vitro. May play a role in attenuating intracellular sphingosine 1-phosphate (S1P) signaling. May play a role in pro-inflammatory signa…
MCL	16	Sky Blue	3	SPHK1	9606.ENSP00000313681	Sphingosine kinase 1; Catalyzes the phosphorylation of sphingosine to form sphingosine 1-phosphate (SPP), a lipid mediator with both intra- and extracellular functions. Also acts on D-erythro- sphingosine and to a lesser extent sphinganine, but not other lipids, such as D,L-threo-dihydrosphingosine, N,N- dimethylsphingosine, diacylglycerol, ceramide, or phosphatidylinositol
MCL	17	Sky Blue 3	2	PAFAH1B3	9606.ENSP00000444935	Platelet-activating factor acetylhydrolase IB subunit gamma; Inactivates paf by removing the acetyl group at the sn-2 position. This is a catalytic subunit. Plays an important role during the development of brain; Belongs to the 'GDSL' lipolytic enzyme family. Platelet-activating factor acetylhydrolase IB beta/gamma subunits subfamily
MCL	17	Sky Blue 3	2	VLDLR	9606.ENSP00000371532	Very low-density lipoprotein receptor; Binds VLDL and transports it into cells by endocytosis. In order to be internalized, the receptor-ligand complexes must first cluster into clathrin-coated pits. Binding to Reelin induces tyrosine phosphorylation of Dab1 and modulation of Tau phosphorylation (By similarity); Low density lipoprotein receptors
MCL	18	Cornflower Blue	2	EPO	9606.ENSP00000252723	Erythropoietin; Hormone involved in the regulation of erythrocyte proliferation and differentiation and the maintenance of a physiological level of circulating erythrocyte mass. Binds to EPOR leading to EPOR dimerization and JAK2 activation thereby activating specific downstream effectors, including STAT1 and STAT3; Endogenous ligands
MCL	18	Cornflower Blue	2	KITLG	9606.ENSP00000228280	Kit ligand; Ligand for the receptor-type protein-tyrosine kinase KIT. Plays an essential role in the regulation of cell survival and proliferation, hematopoiesis, stem cell maintenance, gametogenesis, mast cell development, migration and function, and in melanogenesis. KITLG/SCF binding can activate several signaling pathways. Promotes phosphorylation of PIK3R1, the regulatory subunit of phosphat…
MCL	19	Blue	2	CHGA	9606.ENSP00000216492	Chromogranin-A; Pancreastatin: Strongly inhibits glucose induced insulin release from the pancreas; Belongs to the chromogranin/secretogranin protein family
MCL	19	Blue	2	ENO2	9606.ENSP00000437402	Gamma-enolase; Has neurotrophic and neuroprotective properties on a broad spectrum of central nervous system (CNS) neurons. Binds, in a calcium-dependent manner, to cultured neocortical neurons and promotes cell survival (By similarity); Enolases
MCL	20	Medium Slate Blue 3	2	LOX	9606.ENSP00000231004	Protein-lysine 6-oxidase; Responsible for the post-translational oxidative deamination of peptidyl lysine residues in precursors to fibrous collagen and elastin. Regulator of Ras expression. May play a role in tumor suppression. Plays a role in the aortic wall architecture (By similarity); Belongs to the lysyl oxidase family
MCL	20	Medium Slate Blue 3	2	MFAP2	9606.ENSP00000364685	Microfibrillar-associated protein 2; Component of the elastin-associated microfibrils; Belongs to the MFAP family
MCL	21	Medium Slate Blue	2	RGS1	9606.ENSP00000356429	Regulator of G-protein signaling 1; Regulates G protein-coupled receptor signaling cascades, including signaling downstream of the N-formylpeptide chemoattractant receptors and leukotriene receptors. Inhibits B cell chemotaxis toward CXCL12 (By similarity). Inhibits signal transduction by increasing the GTPase activity of G protein alpha subunits thereby driving them into their inactive GDP-bound…
MCL	21	Medium Slate Blue	2	RGS2	9606.ENSP00000235382	Regulator of G-protein signaling 2; Regulates G protein-coupled receptor signaling cascades. Inhibits signal transduction by increasing the GTPase activity of G protein alpha subunits, thereby driving them into their inactive GDP-bound form. It is involved in the negative regulation of the angiotensin-activated signaling pathway. Plays a role in the regulation of blood pressure in response to sig…
MCL	22	Medium Slate Blue 2	2	MMP7	9606.ENSP00000260227	Matrix metalloproteinase-7 (matrilysin, uterine); Matrilysin; Degrades casein, gelatins of types I, III, IV, and V, and fibronectin. Activates procollagenase; M10 matrix metallopeptidases
MCL	22	Medium Slate Blue 2	2	SPP1	9606.ENSP00000378517	Secreted phosphoprotein 1; Osteopontin; Binds tightly to hydroxyapatite. Appears to form an integral part of the mineralized matrix. Probably important to cell-matrix interaction; Endogenous ligands
MCL	23	Medium Purple	2	CHST11	9606.ENSP00000305725	Carbohydrate sulfotransferase 11; Catalyzes the transfer of sulfate to position 4 of the N-acetylgalactosamine (GalNAc) residue of chondroitin. Chondroitin sulfate constitutes the predominant proteoglycan present in cartilage and is distributed on the surfaces of many cells and extracellular matrices. Can also sulfate Gal residues in desulfated dermatan sulfate. Preferentially sulfates in GlcA->G…
MCL	23	Medium Purple	2	CHST2	9606.ENSP00000307911	Carbohydrate sulfotransferase 2; Sulfotransferase that utilizes 3'-phospho-5'-adenylyl sulfate (PAPS) as sulfonate donor to catalyze the transfer of sulfate to position 6 of non-reducing N-acetylglucosamine (GlcNAc) residues within keratan-like structures on N-linked glycans and within mucin-associated glycans that can ultimately serve as SELL ligands. SELL ligands are present in high endothelial…
MCL	24	Medium Purple 2	2	FCER1G	9606.ENSP00000289902	High affinity immunoglobulin epsilon receptor subunit gamma; Associates with a variety of FcR alpha chains to form a functional signaling complex. Regulates several aspects of the immune response. The gamma subunit has a critical role in allowing the IgE Fc receptor to reach the cell surface. Also involved in collagen-mediated platelet activation and in neutrophil activation mediated by integrin;…
MCL	24	Medium Purple 2	2	FCGR2A	9606.ENSP00000271450	Low affinity immunoglobulin gamma Fc region receptor II-a; Binds to the Fc region of immunoglobulins gamma. Low affinity receptor. By binding to IgG it initiates cellular responses against pathogens and soluble antigens. Promotes phagocytosis of opsonized antigens; CD molecules
MCL	25	Orchid 4	2	FZD7	9606.ENSP00000286201	Frizzled class receptor 7; Frizzled-7; Receptor for Wnt proteins. Most of frizzled receptors are coupled to the beta-catenin canonical signaling pathway, which leads to the activation of disheveled proteins, inhibition of GSK- 3 kinase, nuclear accumulation of beta-catenin and activation of Wnt target genes. A second signaling pathway involving PKC and calcium fluxes has been seen for some family…
MCL	25	Orchid 4	2	PTK7	9606.ENSP00000418754	Inactive tyrosine-protein kinase 7; Inactive tyrosine kinase involved in Wnt signaling pathway. Component of both the non-canonical (also known as the Wnt/planar cell polarity signaling) and the canonical Wnt signaling pathway. Functions in cell adhesion, cell migration, cell polarity, proliferation, actin cytoskeleton reorganization and apoptosis. Has a role in embryogenesis, epithelial tissue o…
MCL	26	Orchid 3	2	ATP1B3	9606.ENSP00000286371	Sodium/potassium-transporting ATPase subunit beta-3; This is the non-catalytic component of the active enzyme, which catalyzes the hydrolysis of ATP coupled with the exchange of Na(+) and K(+) ions across the plasma membrane. The exact function of the beta-3 subunit is not known; ATPase Na+/K+ transporting subunits
MCL	26	Orchid 3	2	FXYD2	9606.ENSP00000292079	Sodium/potassium-transporting ATPase subunit gamma; May be involved in forming the receptor site for cardiac glycoside binding or may modulate the transport function of the sodium ATPase; Belongs to the FXYD family
MCL	27	Violet	2	B3GNT7	9606.ENSP00000287590	UDP-GlcNAc:betaGal beta-1,3-N-acetylglucosaminyltransferase 7; May be involved in keratane sulfate biosynthesis. Transfers N-acetylgalactosamine on to keratan sulfate-related glycans. May play a role in preventing cells from migrating out of the original tissues and invading surrounding tissues; Beta 3-glycosyltransferases
MCL	27	Violet	2	FMOD	9606.ENSP00000347041	Fibromodulin; Affects the rate of fibrils formation. May have a primary role in collagen fibrillogenesis (By similarity); Belongs to the small leucine-rich proteoglycan (SLRP) family. SLRP class II subfamily
MCL	28	Purple	2	FCGR3A	9606.ENSP00000356946	Low affinity immunoglobulin gamma Fc region receptor III-A; Receptor for the Fc region of IgG. Binds complexed or aggregated IgG and also monomeric IgG. Mediates antibody-dependent cellular cytotoxicity (ADCC) and other antibody-dependent responses, such as phagocytosis; CD molecules
MCL	28	Purple	2	LILRB4	9606.ENSP00000375616	Leukocyte immunoglobulin-like receptor subfamily B member 4; Receptor for class I MHC antigens. Recognizes a broad spectrum of HLA-A, HLA-B, HLA-C and HLA-G alleles. Involved in the down-regulation of the immune response and the development of tolerance, e.g. towards transplants. Interferes with TNFRSF5- signaling and NF-kappa-B up-regulation. Inhibits receptor-mediated phosphorylation of cellula…
MCL	29	Orchid	2	TFF1	9606.ENSP00000291527	Trefoil factor 1; Stabilizer of the mucous gel overlying the gastrointestinal mucosa that provides a physical barrier against various noxious agents. May inhibit the growth of calcium oxalate crystals in urine
MCL	29	Orchid	2	TFF2	9606.ENSP00000291526	Trefoil factor 2; Inhibits gastrointestinal motility and gastric acid secretion. Could function as a structural component of gastric mucus, possibly by stabilizing glycoproteins in the mucus gel through interactions with carbohydrate side chains (By similarity)
MCL	30	Orchid 2	2	DDR1	9606.ENSP00000427552	Epithelial discoidin domain-containing receptor 1; Tyrosine kinase that functions as cell surface receptor for fibrillar collagen and regulates cell attachment to the extracellular matrix, remodeling of the extracellular matrix, cell migration, differentiation, survival and cell proliferation. Collagen binding triggers a signaling pathway that involves SRC and leads to the activation of MAP kinas…
MCL	30	Orchid 2	2	TM4SF1	9606.ENSP00000304277	Transmembrane 4 L six family member 1
MCL	31	Hot Pink	2	S100A8	9606.ENSP00000357722	Protein S100-A8; S100A8 is a calcium- and zinc-binding protein which plays a prominent role in the regulation of inflammatory processes and immune response. It can induce neutrophil chemotaxis and adhesion. Predominantly found as calprotectin (S100A8/A9) which has a wide plethora of intra- and extracellular functions. The intracellular functions include: facilitating leukocyte arachidonic acid tr…
MCL	31	Hot Pink	2	S100A9	9606.ENSP00000357727	Protein S100-A9; S100A9 is a calcium- and zinc-binding protein which plays a prominent role in the regulation of inflammatory processes and immune response. It can induce neutrophil chemotaxis, adhesion, can increase the bactericidal activity of neutrophils by promoting phagocytosis via activation of SYK, PI3K/AKT, and ERK1/2 and can induce degranulation of neutrophils by a MAPK-dependent mechani…
MCL	32	Hot Pink 2	2	ASRGL1	9606.ENSP00000400057	L-asparaginase / beta-aspartyl-peptidase; Isoaspartyl peptidase/L-asparaginase; Has both L-asparaginase and beta-aspartyl peptidase activity. May be involved in the production of L-aspartate, which can act as an excitatory neurotransmitter in some brain regions. Is highly active with L-Asp beta-methyl ester. Besides, has catalytic activity toward beta-aspartyl dipeptides and their methyl esters, …
MCL	32	Hot Pink 2	2	IL4I1	9606.ENSP00000472474	Interleukin 4 induced 1; L-amino-acid oxidase; Lysosomal L-amino-acid oxidase with highest specific activity with phenylalanine. May play a role in lysosomal antigen processing and presentation (By similarity); Belongs to the flavin monoamine oxidase family. FIG1 subfamily
MCL	33	Pink	1	ITGA3	9606.ENSP00000007722	Integrin alpha-3; Integrin alpha-3/beta-1 is a receptor for fibronectin, laminin, collagen, epiligrin, thrombospondin and CSPG4. Integrin alpha-3/beta-1 provides a docking site for FAP (seprase) at invadopodia plasma membranes in a collagen-dependent manner and hence may participate in the adhesion, formation of invadopodia and matrix degradation processes, promoting cell invasion. Alpha- 3/beta-…
MCL	34	Light Coral	1	ITGAM	9606.ENSP00000441691	Integrin alpha-M; Integrin ITGAM/ITGB2 is implicated in various adhesive interactions of monocytes, macrophages and granulocytes as well as in mediating the uptake of complement-coated particles. It is identical with CR-3, the receptor for the iC3b fragment of the third complement component. It probably recognizes the R-G-D peptide in C3b. Integrin ITGAM/ITGB2 is also a receptor for fibrinogen, f…
