# Supplementary material for: Machine learning identifies exosome features related to hepatocellular carcinoma
Source: Front Cell Dev Biol. 2022 Sep 19;10:1020415. doi: 10.3389/fcell.2022.1020415 (PMC9527306; doi:10.3389/fcell.2022.1020415)
Supplement: Supplementary file 6 [file Table1.XLSX]

## Sheet: Sheet1
Exosome-related genes	PI3K-Akt genes	NK cell genes	mitosis genes	B cell genes	CD8+T cell genes
Itgam	AKT3	NKG2D	AKAP8	CD19	CD8A
Mfge8	BCL2L11	MIC	ANAPC10	CD79A	CXCL10
Hspa8	MIR1181	ULBP	ANAPC11	BANK1	CXCL9
Actb	MIR4260	LFA1	ANAPC4	JCHAIN	GZMA
Gnai2	MIR3652	ICAM1	ANAPC5	MZB1	GZMB
Anxa2	LINC02478	NKP30	ANLN	TNFRSF17	IFNG
H2-Ab1	C8orf44-SGK3	B7-H6	ATM		PRF1
Cd9	MIR4758	CD28H	AURKA		TBX21
Hsp90ab1	SGK2	B7-H7	BIRC5
CD63	LPAR6	NKP44	BRSK1
DPP4	CDK2	NKP46	BUB1
EPS8L3	CDK4	CD2	BUB1B
BAIAP2L1	CDK6	CD58	CCNA2
MUC13	CDKN1A	2B4	CD28
PTGFRN	CDKN1B	CD48	CDC16
LDHA	LAMC3	DNAM1	CDC23
PGK1	CREB3	TIGIT	CDC25B
HLA-DRA	GNB5	CD96	CDC25C
ACTB	CHAD	CD155	CDC27
KRT1	CDC37	CD112	CDC2L5
GAPDH	CHRM1	KIR2DL1	CDCA5
TUBB4B	CHRM2	KIR2DL2	CDKN2B
HLA-A	CHUK	KIR2DL3	CENPE
ENO1	THEM4	HLA-C	CETN1
HSP90AA1	PIK3AP1	NKG2A	CHFR
CKB	COL1A1	NKG2C	CHMP1A
KRT10	COL1A2	HLA-E	CIT
PKM	COL2A1		CLIP1
EPCAM	COL4A1		DCTN2
DPEP1	COL4A2		DCTN3
DPP4	COL4A3		DDX11
KRT9	COL4A4		EGF
EPS8	COL4A5		EPGN
STX3	COL4A6		EREG
STXBP2	COL6A1		ESPL1
MEP1A	COL6A2		GML
GPA33	COL6A3		KIF11
Cd86	COL9A1		KIF15
Cd40	COL9A2		KIF22
Cd40lg	COL9A3		KIF25
Itgb2	COMP		KIF2C
Icam1	COL6A6		KNTC1
Anpep	CREB1		MAD2L1
Rps6ka1	ATF2		MAD2L2
Anxa6	ATF6B		NBN
Cdc25c	CSF1		NCAPH
Actg1	CSF1R		NDC80
Actb	CSF3		NEK2
Cd86	CSF3R		NEK6
Icam1	CSH1		NOLC1
Itgb2	CSH2		NPM2
Hspd1	CSHL1		NUMA1
Hspa8	PIK3R6		NUSAP1
Hspa8	CREB3L4		PAM
Hspa8	LPAR1		PBRM1
Hspd1	EFNA1		PCBP4
Lamp2	EFNA2		PDS5B
Cd9	EFNA3		PIN1
Pdcd6ip	EFNA4		PKMYT1
Itgb2	EFNA5		PLK1
Hsp90ab1	EGF		PML
Tubb5	EGFR		PPP5C
Anxa7	EPHA2		PRMT5
Tsg101	EIF4B		RAD17
Gdi2	EIF4E		RAN
Eef1a1	EIF4EBP1		RCC1
Eif4a2	EPO		RINT1
Anxa1	EPOR		SMC1A
Anxa5	AKT1		SMC3
Anxa4	AKT2		SMC4
Lgals3	F2R		SSSCA1
Sdcbp	FGF1		SUGT1
Ywhah	FGF2		TARDBP
Ywhaz	FGF3		TGFA
Ywhag	FGF4		TGFB1
Prdx1	FGF5		TPX2
Rab11b	FGF6		TRIAP1
Rab7	FGF7		TTK
Rap1b	FGF8		TTN
Cfl1	FGF9		UBE2C
H3f3a	FGF10		ZW10
H3f3b	FGF11		ZWINT
Hist1h2bf	FGF12
Hist1h2bj	FGF13
Hist1h2bl	FGF14
Hist1h2bn	FGFR1
Hist2h2aa1	FGFR3
Hist2h2aa2	FGFR2
Hist4h4	FGFR4
Pfn1	VEGFD
CD81	LAMB4
CD63	ITGA11
HLA-B	PHLPP2
HLA-DRA	FOXO3
HLA-DRB5	FLT1
HLA-DRB1	FLT3
HLA-DQB1	FLT3LG
PTPRC	PHLPP1
ITGA4	FLT4
GNAI2	FN1
HSP90AA1	PIK3R5
HSPA8	LPAR3
CLTC	SGK3
TUBA1A	MTOR
TUBB	EIF4E1B
TUBA1B	G6PC1
MSN	COL6A5
PKM	FGF20
ENO1	FGF21
GAPDH	GH1
ALDOA	GH2
ATP1A1	GHR
EEF1A1	FGF22
MCAM	GNB1
MLANA	GNB2
ANXA2	GNB3
ACLY	GNG3
ENO1	GNG4
LDHB	GNG5
GSTP1	GNG7
PGAM1	GNG10
TPI1	GNG11
GAPDH	GNGT1
MDH1	GNGT2
AKR1B1	PPP2R3B
HSPA8	ANGPT1
HSPA1A	LAMA1
HSPA1B	LPAR4
ACTG1	ANGPT2
ACTB	GRB2
CAPZB	GSK3B
RDX	PKN3
MSN	GYS1
EZR	GYS2
SDCBP	HGF
KRT10	HRAS
ANXA5	HSP90AA1
ANXA6	HSP90AB1
EEF2	TNC
IGSF8	IBSP
STXBP1	IFNA1
CTNND1	IFNA2
PDCD6IP	IFNA4
GDI2	IFNA5
GNB1	IFNA6
GNA11	IFNA7
PPP1CA	IFNA8
TSNAXIP1	IFNA10
YWHAE	IFNA13
RAN	IFNA14
SEPT2	IFNA16
WDR1	IFNA17
STXBP2	IFNA21
Stx8	IFNAR1
Vti1a	IFNAR2
Vti1b	IFNB1
Rab7	IGF1
Rab11a	IGF1R
Rab11b	IGF2
Lamp1	IKBKB
Lamp2	IL2
Cd9	IL2RA
Cd63	FASLG
Cd74	IL2RB
Ctss	IL2RG
Capg	IL3
Cfl1	IL3RA
Myl6	IL4
Myh9	IL4R
Msn	IL6
Sdcbp	IL6R
Gnai2	IL7
Rab8b	IL7R
Eif4a2	INS
Eif3f	INSR
Cap1	ITGA6
S100a10	IRS1
Anxa2	ITGA1
Pdcd6ip	ITGA2
Rhog	ITGA2B
Ywhaz	ITGA3
Ywhab	ITGA4
Hist1h2bp	ITGA5
Ywhae	ITGA7
Hspa8	ITGA9
Hsp90aa1	ITGAV
Gapdh	ITGB1
Pkm	ITGB3
Pgam1	ITGB4
Aldoa	ITGB5
Eno1	ITGB6
Pgk1	ITGB7
Cstb	ITGB8
Iqgap1	JAK1
Clic4	JAK2
Atp1a3	JAK3
Lgals3	KDR
Cd81	KIT
Fcer1g	KRAS
Anpep	LAMA2
Cd14	LAMA3
Itgb2	LAMA4
Itgam	LAMA5
Basp1	LAMB1
Mfge8	LAMB2
Slc16a1	LAMB3
Ezr	LAMC1
Lcp1	LAMC2
Anxa2	MCL1
Lpl	MDM2
CAPN7	MET
DDAH1	KITLG
Hist1h3f	MYB
Rps15a	MYC
Ppia	ATF4
Rpl23a	NFKB1
Rpl12	NGF
Vcp	NGFR
Rpl13	NOS3
Rab5a	NRAS
Hist1h3c	NTF3
Hist1h3d	NTF4
Hist1h3b	NTRK1
Hist1h3e	NTRK2
Hist1h3h	OSM
Hist1h3i	PCK1
Hist2h3b	PCK2
Hist1h4c	ANGPT4
Hist1h4d	PDGFA
Hist1h4f	PDGFB
Hist1h4i	PDGFRA
Hist1h4j	PDGFRB
Hist1h4k	PDPK1
Hist1h4n	GNG13
Hist1h2ac	PGF
Hist1h2ad	PIK3CA
Hist1h2ae	PIK3CB
Hist1h2ag	PIK3CD
Hist1h2an	PIK3CG
Hist1h2ap	PIK3R1
Hist1h2ab	PIK3R2
Hist1h2bf	GNG2
Hist1h2bj	DDIT4
Hist1h2bl	PPP2R3C
Hist1h2bm	PPP2CA
Hist1h2bn	PPP2CB
Hist1h2ai	PPP2R1A
Hist2h2aa2	PPP2R1B
Rpl17	PPP2R2A
PGLS	PPP2R2B
SAMM50	PPP2R2C
Hist4h4	PPP2R3A
Phf8	PPP2R5A
Hist1h4a	PPP2R5B
Hist1h4b	PPP2R5C
CLU	PPP2R5D
CLIC4	PPP2R5E
CLIC1	PRKAA1
Aldoart1	PRKAA2
CHMP2B	PRKCA
ULK3	PPP2R2D
Hist1h3a	PKN1
Gm5138	PKN2
TPP1	MAPK1
Krt77	MAPK3
Eno1b	GNG12
Gm13991	PDGFC
Gm5537	MAP2K1
Gm5561	MAP2K2
Rps2-ps13	PRL
RNF11	PRLR
Rps27a-ps2	RELN
CNP	LPAR5
Rpl27-ps3	BAD
Rps13-ps1	PTEN
VPS4A	PTK2
ARFIP1	RPTOR
CHMP2A	G6PC2
SMPDL3B	RAC1
Gm7053	RAF1
Gm12164	RBL2
COL6A1	GNB4
PACSIN3	CCND1
CR1	BCL2
EHD4	RELA
EHD3	BCL2L1
HEBP1	RHEB
VPS28	RPS6
DCXR	RPS6KB1
RHCG	RPS6KB2
CHMP5	BDNF
VTA1	TNN
RAB14	MLST8
GPRC5B	SGK1
CAB39	CREB3L2
RAB8B	SOS1
TM7SF3	SOS2
MXRA8	SPP1
LAMTOR1	BRCA1
MOB1A	STK11
UEVLD	SYK
GPRC5C	TEK
GNG12	TGFA
BAIAP2L1	THBS1
ACE	THBS2
CHMP1B	THBS3
SLC44A2	THBS4
DDT	TLR2
DEFA1	TLR4
DEFA3	TNR
CPNE5	TNXB
TMBIM1	TP53
DNAH8	HSP90B1
DPEP1	TSC1
DPP4	TSC2
MMRN2	VEGFA
TTYH3	VEGFB
SLC44A4	VEGFC
RAB1B	VTN
RAB33B	VWF
EEF1A1	PDGFD
RBP5	FGF23
EGF	TCL1A
CYSTM1	CASP9
EIF5A	CREB3L3
ABHD14B	PIK3R3
ENO1	ITGA10
ENO3	ITGA8
ENPEP	IKBKG
STOM	FGF18
MOB1B	FGF17
ARRDC1	CCND2
EPS8	CCND3
MVB12A	CCNE1
SNX18	CREB3L1
FABP3	CCNE2
CHMP4B	LPAR2
MITD1	OSMR
ALB	G6PC3
S100A16	CD19
FGA	GNG8
CPNE8	EIF4E2
BROX	CREB5
GLIPR2	TCL1B
FN1	FGF19
ALDOA
ALDOB
AKR1B1
ATP6V1C2
FTL
FUS
GAA
FTLP3
GAPDH
AMBP
GGT1
GLB1
GLG1
GNA11
GNAI1
GNAI2
GNAI3
GNAS
GNB1
GNB2
GNG7
SFN
GPI
GSTA1
GSTA2
ANPEP
GSTA3
GSTM3
GSTP1
GUSB
HIST1H2AD
ANXA2
HLA-A
ANXA3
ANXA4
ANXA5
ANXA6
ANXA7
ANXA11
PEF1
HPGD
HRAS
HSPA1A
HSPA1B
HSPA5
HSPA6
HSPA8
APCS
HSP90AA1
HSP90AB1
HSPD1
IDH1
APOD
APRT
AQP1
AQP2
KNG1
KRAS
ARF1
ARF3
ARF4
LAMP1
ARF5
ARF6
LDHA
LDHB
LGALS3BP
RHOA
LRP2
MAN1A1
ARL3
MDH1
RAB8A
MIF
MME
ASAH1
MSN
MUC1
MYH9
ASS1
ACLY
NAGLU
NONO
NPM1
NRAS
P2RX4
P4HB
PEBP1
FXYD2
SERPINA5
PFN1
PFN2
PGAM1
PGK1
ABCB1
SERPINA1
PIGR
PIK3C2B
PKD1
PKM
ACP2
PLSCR1
PODXL
CTSA
PPIA
ACPP
PSAP
PSMB3
PTBP1
PTPRJ
RAB1A
RAB2A
RAB3B
RAB5A
RAB5B
RAB13
RAB27B
RAB5C
RAC1
RALB
RAP1B
RBM3
ACTA2
RDX
RNASE2
ACTB
S100A6
S100A11
S100P
SDCBP
BHMT
SLC1A1
SLC2A5
SLC12A1
SLC12A3
SNCG
SNRPD1
SOD1
SRI
BST2
TF
THBS1
THY1
TMPRSS2
TPI1
ACTC1
TSG101
C3
ACTG1
TUBB2A
UBE2N
UMOD
UPK2
ACTG2
EZR
VTN
EIF4H
YWHAB
YWHAE
YWHAG
YWHAZ
CA2
CA4
NPHS2
RAB7A
Actb
Actc1
Actg1
Avil
Alb
Aldoa
Anxa11
Anxa3
Anxa5
Anxa6
Anxa7
Anxa8
Apoe
Rplp0
Arf1
Serpinc1
Atp1a1
PSCA
Bub1b
Capg
Capza1
Capza2
Capzb
Casp6
Casp8
Cct2
Cct3
Cct4
Cct6a
Cct7
Cct8
CUBN
Cd37
Cd63
Cfl1
Coro1a
Col6a2
Cox7a2
Cpa3
Cpne6
Cs
Csnk2a1
Csnk2a2
Csnk2b
Ddx3x
Eef1a1
Eef1a2
Eef2
Eif3a
Eno1
Eno2
Fbln1
Fth1
Ftl1
Ftl2
Fv4
CALB1
Gapdh
Gnai2
Gnai3
Gnb1
Gnb2l1
Gpi1
Grik1
Pdia3
Hspa5
Hist1h1d
H1f0
H2-D1
H2-K1
H2-L
H2-Q7
Hist2h3c1
H3f3a
H3f3b
Hba-a1
Hbb
Hbb-b1
Hbb-b2
Hist2h2aa1
H2afx
Hnrnpk
Hspa8
Hsp90ab1
Hsp90aa1
Icam1
Kpnb1
Itga6
Itgb1
Itih2
Itih3
Krt10
Krt15
Krt6a
Krt6b
Rpsa
Anpep
Rps2
BBOX1
Lyn
Cma1
Slc3a2
Msn
Mug1
CALR
Ncl
Npm1
Ddr2
P4hb
Pdcd6ip
Pfn1
Pgk1
Phf2
Pkm
Pklr
Lcp1
Ppp1ca
Psma3
Psmc3
Psme3
Rab12
Rab5b
Rab5c
Rac1
Rac2
Ran
Rdx
Rpl18
Rpl21
Rpl22
Rpl27
Rpl29
Rpl30
Rpl6
Rpl7
Sub1
Rps12
Rps14
Rps16
Rps17
Rps18
Rps19
Rps24
Rps3a1
Rps4x
Rps5
Rps6
Rps7
Rps8
Srsf2
Srsf3
Slc7a5
Snrnp70
Snrpe
Spn
Ssb
Stip1
Tagln2
Tcp1
RAB11A
Psmd2
NAPA
Tjp2
Tln1
Tpi1
Tpm1
Hsp90b1
Plscr1
Trf
Tfrc
Rpl13a
Tuba1a
Tuba1b
Tuba1c
Tubb3
Tubb4a
Tubb5
Ezr
Vtn
Wdr1
Ywhae
Ywhag
Ywhah
Ywhaq
Ywhaz
Zfp35
Banf1
Cdc6
PROM1
FCGBP
Adgre5
Psma4
Psma5
Serinc3
Rpl8
Rps3
Rpl7a
Rps11
Rps26
CPNE3
MGAM
Iqgap1
Adamts8
Fbxw4
Hist1h1c
Hist1h1e
H2afz
Ppp2r1a
GPRC5A
Tspan14
Sdcbp
Nap1l1
Cntn6
Copg2
Rpl36
Ywhab
Apom
Eif3d
Sfn
Rplp1
RAB11B
Arpc3
Trip4
Hist1h1b
Krt71
Tpm3
Actn4
VAMP3
SLC9A3R1
ITM2B
NAPSA
VPS4B
RAB3D
SERPINA3
PRDX6
Eif3f
Rps23
Actr2
CD9
Naa16
Rps10
Rpl14
Nop56
Rps20
Arpc5
Rpl4
Tubb6
Trap1
Nmb
Rps13
Rpl24
IST1
Hist1h4h
Cpne3
PDCD6IP
PDCD6
ARPC4
CD59
TSPAN1
CD63
PDZK1IP1
CD81
NUTF2
Actr3
FLOT1
HRSP12
Rps25
ACY1
Rpl18a
CDC42
BAIAP2
Rps27a
Asb15
OLFM4
Spock2
Hist2h3c2
Hist2h4
Hist1h3g
Ehd4
MASP2
Acly
RAB10
EHD1
LMAN2
YWHAQ
RAB35
DSTN
UPK1A
Sri
Rap1a
Fdps
Krt5
CFL1
Cse1l
RRAS2
SEC31A
Clic1
PTGR1
RAB21
Zcchc6
Rap1b
Gemin5
Coq6
Tubb4b
Fam129b
Gsn
Cnot3
Cchcr1
CD37
CD63
CD81
CD82
HLA-DMB
GCNT2
ICAM1
CD86
LAMP1
LAMP2
TFRC
CD53
HLA-DRB5
CD247
CD247
CD63
CD2
ITGB2
CXCR4
HLA-E
HLA-DRB5
ERBB2
ACTB
ACTG1
CD63
CD81
A2M
ACP1
ACTA1
ACTA2
ACTB
ACTC1
ACTG1
ACTG2
ACTN4
ACTN1
ACTN2
ADAM10
AHCY
ALB
ALDH1A1
ALDOA
SLC25A4
SLC25A5
SLC25A6
ANXA1
ANXA2
ANXA2P2
ANXA4
ANXA5
ANXA11
APOA1
ARF1
ARF3
ARF4
ARF5
ARHGDIA
ARVCF
ATP1A1
ATP1A2
ATP1A3
ATP1B1
ATP5A1
ATP5B
ATP5I
ATP5O
B2M
CALM1
CALM2
CALM3
CANX
CAPZA1
CD9
CD44
CD59
CDH1
CFL1
CFL2
CKB
CLTC
COX4I1
COX5B
CLDN3
CSPG4
CSRP1
CST3
CTNNA1
CTNNB1
NQO1
DYNC1H1
DPP4
EEF1A1
EEF1A2
EEF2
EFNB1
CTTN
ENO1
EPHB4
F5
FASN
FKBP1A
FLNA
FLNB
G6PD
GAPDH
GDI2
GNAI2
GNAI3
GPI
PDIA3
GSN
GSTP1
HADHA
HNRNPA2B1
HNRNPH2
HSPA1A
HSPA1B
HSPA1L
HSPA2
HSPA4
HSPA5
HSPA6
HSPA7
HSPA8
HSPA9
HSP90AA1
HSP90AA4P
HSP90AA2P
HSP90AB1
HSP90AB3P
HSPD1
HSPE1
HSPG2
IDH1
ITGA6
ITGA2
ITGAV
ITGB1
ITGB4
JUP
CD82
KPNB1
KRT1
KRT2
KRT5
KRT8
KRT9
KRT10
KRT13
KRT14
KRT15
KRT16
KRT18
KRT19
LAMP1
LDHA
LDHB
LGALS4
LYZ
EPCAM
MARCKS
RAB8A
MFGE8
MIF
MMP7
MSN
MYH9
MYH10
MYL6
MYO1C
MYO1D
NME1
NME2
P4HB
PEBP1
PRDX1
PCBP1
CHMP1A
SERPINF1
PFN1
PGK1
PHB
SERPINA1
PKM
PPIA
PPIB
PRKAR2A
PRKDC
PSMA2
PTGFRN
QSOX1
PYGB
RAB2A
RAB5A
RAB5B
RAB6A
RAB5C
RAC1
RALA
RALB
RAN
RAP1A
RAP1B
RDX
RPL6
RPL8
RPLP1
RPLP2
RPN1
RPS3
RPS7
RPS13
RPS14
RPS15A
RPS18
RPS20
RPS21
RPS27A
RRAS
S100A6
S100A10
S100A11
S100P
SDC1
SDC4
SDCBP
SLC1A5
SLC2A1
SLC3A2
SLC12A2
SLC16A1
SOD1
SPTBN1
SSBP1
SSR4
TBCA
TCEB1
TFRC
THBS1
TKT
TSPAN8
TPI1
TPM1
HSP90B1
TUBA4A
TUBB2A
TUFM
TXN
UBA52
UBB
UBC
UBA1
UBE2N
UBE2V2
UGDH
UQCRC2
VCP
VIL1
EZR
YWHAB
YWHAE
YWHAG
YWHAH
YWHAZ
TUBA1A
RAB7A
SLC7A5
HIST1H4I
HIST1H4A
HIST1H4D
HIST1H4F
HIST1H4K
HIST1H4J
HIST1H4C
HIST1H4H
HIST1H4B
HIST1H4E
HIST1H4L
HIST2H4A
TAGLN2
RUVBL1
VAMP8
RAB11A
SNAP23
IQGAP1
KRT75
RAB11B
VAMP3
SLC9A3R1
TJP2
ROCK2
PRDX6
IST1
PDCD6IP
PDCD6
ARPC3
ACTR3
LRPPRC
TRAP1
FLOT1
TUBA1B
TUBB4A
TUBB4B
GNB2L1
HYOU1
AGR2
CCT2
ATP5L
CCT8
SLC12A7
IQGAP2
RAB10
PRDX3
TMED2
YWHAQ
GCN1L1
RAB35
PHB2
RRAS2
CLSTN1
CYFIP1
SLC44A1
CORO1C
MTCH2
QPCT
PRDX5
CLIC4
SND1
CHMP2A
SMPDL3B
EHD4
F11R
LIMA1
RAB6B
KRT20
VPS35
GNG12
TOMM22
AKR1B10
S100A14
DIP2B
RAP2C
FAM129B
MARCKSL1
AHNAK
VPS37B
TUBA4B
ARPC5L
RAB1B
RAB33B
EPPK1
REG4
CYSTM1
TUBA1C
TNKS1BP1
DCD
HIST4H4
CHMP4B
MITD1
MYL6B
S100A16
BRI3BP
BROX
AGR3
EEF1A1P5
KRT24
TUBB
MIF-AS1
ACTBL2
TUBB2B
KRT77
AGRN
RAB15
HSP90AB2P
POTEKP
LOC442497
HIST2H4B
RAP1BL
POTEI
POTEF
SDCBP
PKM
GAPDH
VPS28
ARF4
FLOT1
HIST4H4
CFL1
ANXA4
RAP2B
MYH14
SDCBP2
RPL12
HLA-A
PPIA
RPS16
RPS27A
FLOT2
RPS18
ACTG1
ENO1
S100A14
ARF1
ARF3
PDCD6IP
RPL10AP6
RPL10A
CCT2
ANXA2
ACTB
HLA-C
MYL6
CCT7
RPS3
GOLGA7
TUBB
KRT1
MVB12A
RAP1B
RAP1BL
MFGE8
ARRDC1
RAB1A
TCP1
VPS37B
YWHAZ
TUBB4B
RPS8
UBA52
ITGA2
RAB7A
CLTC
RAP2A
UBC
PTGFRN
HLA-B
HIST1H2AB
HIST1H2AE
HIST3H2A
RAB10
EDIL3
ARF5
IGH
VPS25
IGKC
RAP2C
ITGA6
PFN1
GNB2L1
CCT6A
IGHG1
RAB1B
KRT2
RHOA
ITGB4
CCT3
GPA33
TUBA1B
TOLLIP
HIST1H2AJ
HIST1H2AK
RAB5A
HSPA8
HIST2H2AC
TUBB2B
MYH9
RAB8A
PDCD6
IGHV4-31
IGSF8
IGHM
FASN
RAB5C
TUBB4A
RAB35
HRAS
KRAS
DERA
KRT10
CBR1
SETD4
LFNG
YWHAH
EIF4A1
IGKV2-24
EEF2
LGALS3BP
RAP1A
TSG101
LGALS4
KRT6A
RALA
DPEP1
KRT6C
KRT8
PGK1
LIN7C
IGK
MVB12B
RAB13
RAN
RPS15A
PCNA
EIF4A2
IFITM3
TSPAN6
H2AFJ
KRT6B
KRT9
YWHAE
CCT4
EPCAM
TF
VAMP1
IGKV3-20
IGKV1-5
RPLP0
CRYZ
RPS4X
CD55
RAB11B
KRT5
LSR
RHOC
RAB11A
RAB14
HSP90AB1
EHD1
CLIC1
AGRN
GNAI3
METRNL
TUBA1A
RUVBL2
UBB
ANXA11
LGALS3
CCT5
RALB
RPLP2
GNB1
THBS1
ACTA1
ACAA2
RANP1
DIP2B
RAC1
HSPG2
RPS4Y1
MINK1
YWHAG
PLEKHB2
SLC3A2
TUBA3C
TUBA3D
RRAS
RAB4B
KRT14
PDXK
RPLP0P6
ESD
AHCY
ATP1A1
GNAS
PCSK9
HLA-H
CLDN7
FCGBP
CDC42
TAGLN2
EFNB1
HSPA2
WDR1
ADAM10
TUBA3E
RAB8B
CD9
IGHG2
SFN
ITGAV
RAB15
TUBA4A
PPP2R1A
ENO3
UGDH
ACTBL2
CD81
ARF6
CHMP4B
TUBB3
PSMD3
EEF1A2
LDHA
NRAS
EPHA2
TUBA1C
EEF1A1
KRT13
ACTC1
F11R
MYL6B
ATP6AP2
SPTBN1
KRT4
IGHG3
TUBA8
YWHAQ
RAB43
LIN7A
TFRC
PSMC6
PRDX2
CBR3
RPS4Y2
RHOG
EHD4
CLU
VPS37C
F7
CTNND1
KRT79
VPS36
SPTAN1
TNIK
HSP90AA1
GSTP1
PLSCR3
PSMD11
MUC13
MOB1B
ITGB1
CAND1
BROX
CD44
HSPA6
BSG
IFITM2
ANXA6
GNB2
CEMIP
TSPAN14
BAIAP2
MAP4K4
EEF1G
NCALD
EPHB2
COPB1
POTEF
IFITM1
RPSAP58
RPSA
LRSAM1
YWHAB
NEDD4L
CDH17
NCSTN
PLEC
LDHB
ADSL
TUBB8
KRT16
KRT75
ACOT7
RPSAP15
SLC44A1
HSPA1L
MAN1A1
ATP1A2
ITGA3
HPCAL1
POTEKP
PRSS23
TUBB6
BUB3
MIF
ATP5B
EIF3L
PYGB
RAC3
DIP2C
HLA-E
POTEE
KRT19
TTYH3
ALDH16A1
RAB5B
CD46
KRT17
BAIAP2L1
GNA13
TSTA3
MYH10
LRP4
CEACAM5
CLDN3
HSPA1A
HSPA1B
IGSF3
SNRNP200
VCP
KRT28
MYH11
AP2A1
PLXNB2
IGHG4
GNB4
KRT7
RRAS2
ATP1A3
TSPAN8
GARS
ASNS
CYFIP1
NEDD4
NARS
ENO2
DYNC1H1
KRT27
GNB3
SLC29A1
KRT76
KRT15
KRT3
CAD
PSME3
SLC2A1
GPRC5A
GMDS
KPNB1
IQGAP1
PLXNA1
CLDN4
EPHB3
TSPAN15
SLC12A2
SLC1A5
VPS35
ATP4A
EPHB1
KRT77
FAT1
EGFR
TUBB7P
CLTCL1
TNPO3
SERINC5
DIP2A
COPB2
PTPRF
COL12A1
EPHA5
KRT25
ACTR3
EIF3I
ACE
MYADM
SERINC1
UBA1
HEPH
PPP2R1B
LAMA5
HSD17B4
DMBT1
AP2A2
MYOF
TSPAN1
NOTCH1
HSPD1
SORT1
FASLG
TNFSF10
CD63
CEACAM5
HLA-E
Lamp1
H2-M3
HSPA8
HLA-E
MLANA
CD63
FSCN1
TUBB4A
HSPA8
HSP90AA1
DSP
FN1
MYH9
ITGA3
CNTLN
MAP7
ACTN4
HSP90AB1
EZR
MSN
ANXA6
HSPA1A
PKM
EDIL3
KIF15
ENO1
PLVAP
ACTB
CNP
HLA-E
GAPDH
ANXA1
ANXA2
ANXA5
ACTA1
ACTA1
Acta1
Pdia2
PDIA2
L1CAM
L1CAM
Pdcd6ip
Serpina1a
Gapdh
Cd9
Calr
Trf
Gpnmb
Egfr
Tgfb1
Hspb2
Actb
Alb
Cct2
Cct6a
Dpysl2
Eno1
Hspa8
Rpsa
Mela
Pcna
Pgk1
Pkm
Ran
Tubb5
Sdcbp
Eif3i
Eef1b2
Cenpp
Mtap
Arrdc2
Mvp
Nans
Phgdh
Vcp
Psma2
Gstp1
Aprt
Fth1
HSPA8
TGFB1
EGFR
A2m
Cp
Ces1c
Gapdh
Hspa8
Ppia
Ywhaz
Pkm
Tubb5
Slc1a3
Slc3a2
Cltc
Tuba1a
Anxa6
Ubb
Gnat3
Actg1
Gsn
Pdcd6ip
Tsg101
Flot1
Grin1
Gria2
Gria3
CD63
SELP
LAMP2
SFN
HSPA8
Plp1
Cnp
Pdcd6ip
Actb
Actg1
Acta2
Aldoa
Apoe
Arf2
Atp1a1
Car2
Cd81
Cfl1
Ckb
Dpysl2
Eef1a1
Eef1a2
Eef2
Eno1
Gapdh
Gpd1
Gdi1
Gdi2
Gna13
Gnb2
Gng12
Hspa5
Gstp1
Hspa8
Hspa1l
Hspa1b
Hspa2
Hsp90ab1
Hsp90aa1
Fabp5
Krt10
Krt13
Krt14
Krt15
Krt16
Krt17
Krt18
Krt19
Krt1
Krt84
Krt2
Krt4
Krt6a
Krt8
Mbp
Marcksl1
Mog
Mdh1
Nme1
Nme2
Prdx1
Pgk1
Pgk2
Pkm
Taldo1
Prdx2
Tkt
Tpi1
Tuba1a
Tuba3a
Tuba4a
Tuba3b
Tubb4a
Tubb5
Dpysl3
Ywhae
Ywhag
Ywhah
Ywhaq
Ywhaz
Pebp1
Ubd
H2afz
Tuba8
Ywhab
Gltp
Krt71
Sirt2
Cltc
Tubb6
Hist1h4h
Rab1b
Hist3h2ba
Ube2n
Hist2h3c2
Hist2h4
Hist1h3g
Atp1a2
Gm4735
Rap1a
Krt5
Qdpr
Igsf8
Arhgdia
Hspa1a
Tubb4b
Gsn
Atp1a3
Hist1h3f
Ppia
Vcp
Hist1h3c
Hist1h3d
Hist1h3b
Hist1h3e
Hist1h3h
Hist1h3i
Hist2h3b
Hist1h4c
Hist1h4d
Hist1h4f
Hist1h4i
Hist1h4j
Hist1h4k
Hist1h4n
Hist1h2ac
Hist1h2ad
Hist1h2ae
Hist1h2ag
Hist1h2an
Hist1h2ap
Hist1h2ab
Hist2h2ac
Hist1h2bf
Hist1h2bj
Hist1h2bl
Hist1h2bn
Hist1h2ai
Hist4h4
Hist1h4a
Hist1h4b
Hist1h3a
Krt77
Eno1b
Hist1h2ao
Gm2574
Hist1h4m
Gm3272
Gm12537
Gm20899
Gm10359
Gm12033
ACTB
ALDH3B1
ANXA1
ANXA2
CALM1
CALM2
CALM3
CAPS
CD59
CFL1
CLIC1
STOM
GAPDH
GDI2
GNB2
GSTP1
HSPA1A
HSPA1B
MIF
MSN
MUC1
MUC4
MYL6
PKM
PPIA
RDX
SERPINB3
TKT
UBB
UBC
EZR
YWHAZ
TAGLN2
PROM1
SLC9A3R1
TSPAN1
BASP1
CIB1
SLC34A2
SLC6A14
Actb
GPRC5C
EPS8L2
Actb
TUBA1C
MUC16
ACTB
YWHAZ
ACTB
TSG101
CD63
CHST1
Tsg101
Cd63
Cd63
Tsg101
Pdcd6ip
Itgb1
Cd81
Icam1
Mfge8
Asgr1
Apoe
Acly
Adh1
Alb
Aldoa
Aldob
Atp1a1
C4a
Calm1
Calm3
Cat
Cbs
Comt
Cyp2d3
Cyp4a2
Eno1
Fbp1
Fgb
Gapdh
Gstm1
Hmgcs2
Hspa8
Hsd3b5
Hspa1a
Ldha
Mdh1
Myh11
Nras
Pah
Pgk1
Pklr
Sdc4
Slc10a1
Slc2a1
Eef1a2
Tcp1
Hist1h2aa
Hist1h2ba
Clu
Tsc2
Ugt2b
Cyp2a1
Cyp2a2
Gnas
Kpnb1
Cth
Hspa1l
Vars
Slc16a1
Pigr
Cyp2d2
Kng2
Pc
Rgn
Hsd11b1
Bsg
Dpp4
Tst
Acadl
Acsl1
Ephx1
Fth1
Lamp1
Slc2a2
Adk
Irs1
P4hb
Rab12
Rab3a
Ywhaz
Rpn1
Hspa5
Hba1
Gckr
Fn1
Anxa5
Mep1a
Ass1
Myh9l1
Akr7a3
Canx
Tubb5
Arg1
Rpsa
F2
Cfl1
Cyp2c11
[truncated: 701 more rows]
