# Supplementary material for: Machine learning identifies exosome features related to hepatocellular carcinoma
Source: Front Cell Dev Biol. 2022 Sep 19;10:1020415. doi: 10.3389/fcell.2022.1020415 (PMC9527306; doi:10.3389/fcell.2022.1020415)
Supplement: Supplementary file 7 [file Table5.XLSX]

## Sheet: Sheet1
KEGG_A_class	KEGG_B_class	Pathway	out (318)	All (8312)	Pvalue	Qvalue	Pathway ID	Genes	K_IDs
Organismal Systems	Immune system	Complement and coagulation cascades	16	91	2.78e-07	7.54e-05	ko04610	ENSG00000155659;ENSG00000057593;ENSG00000160255;ENSG00000171860;ENSG00000197405;ENSG00000125730;ENSG00000169896;ENSG00000140678;ENSG00000197249;ENSG00000198734;ENSG00000110799;ENSG00000131187;ENSG00000166278;ENSG00000127533;ENSG00000173372;ENSG00000203710	K19822+K01320+K06464+K04009+K04010+K03990+K06461+K06462+K03984+K03902+K03900+K01328+K01332+K04236+K03986+K04011
Organismal Systems	Immune system	Chemokine signaling pathway	19	197	0.000185	0.00805	ko04062	ENSG00000185974;ENSG00000274736;ENSG00000102962;ENSG00000163736;ENSG00000148498;ENSG00000101336;ENSG00000167083;ENSG00000124875;ENSG00000163737;ENSG00000180871;ENSG00000168329;ENSG00000168243;ENSG00000169245;ENSG00000169248;ENSG00000158517;ENSG00000161921;ENSG00000163823;ENSG00000271503;ENSG00000000938	K00909+K05511+K21095+K10029+K04237+K08893+K04549+K05506+K05407+K05050+K04192+K04541+K12671+K12672+K08011+K10035+K04176+K12499+K08891
Organismal Systems	Immune system	Toll-like receptor signaling pathway	9	108	0.022254	0.287	ko04620	ENSG00000196664;ENSG00000101916;ENSG00000136869;ENSG00000114013;ENSG00000170458;ENSG00000169245;ENSG00000169248;ENSG00000187554;ENSG00000271503	K05404+K10170+K10160+K05413+K04391+K12671+K12672+K10168+K12499
Organismal Systems	Immune system	Leukocyte transendothelial migration	9	118	0.036663	0.414	ko04670	ENSG00000160255;ENSG00000253958;ENSG00000087245;ENSG00000185758;ENSG00000169896;ENSG00000005844;ENSG00000113946;ENSG00000158517;ENSG00000116701	K06464+K06087+K01398+K06087+K06461+K05718+K06087+K08011+K08010
Organismal Systems	Immune system	Hematopoietic cell lineage	11	173	0.067687	0.679	ko04640	ENSG00000134460;ENSG00000135218;ENSG00000169896;ENSG00000184371;ENSG00000158473;ENSG00000187266;ENSG00000010610;ENSG00000170458;ENSG00000169704;ENSG00000005961;ENSG00000203710	K05068+K06259+K06461+K05453+K06448+K05079+K06454+K04391+K06263+K06476+K04011
Organismal Systems	Immune system	Antigen processing and presentation	6	77	0.073729	0.682	ko04612	ENSG00000189013;ENSG00000135047;ENSG00000216490;ENSG00000010610;ENSG00000173110;ENSG00000163131	K07981+K01365+K08059+K06454+K03283+K01368
Organismal Systems	Immune system	C-type lectin receptor signaling pathway	6	108	0.232055	1	ko04625	ENSG00000172243;ENSG00000102962;ENSG00000090659;ENSG00000122877;ENSG00000158869;ENSG00000136634	K10074+K21095+K06563+K12496+K07983+K05443
Organismal Systems	Immune system	Natural killer cell mediated cytotoxicity	9	188	0.29286	1	ko04650	ENSG00000160255;ENSG00000189013;ENSG00000131019;ENSG00000111981;ENSG00000096264;ENSG00000005844;ENSG00000158869;ENSG00000162747;ENSG00000203747	K06464+K07981+K07986+K07986+K06742+K05718+K07983+K06463+K06463
Organismal Systems	Immune system	IL-17 signaling pathway	5	97	0.313402	1	ko04657	ENSG00000172216;ENSG00000124875;ENSG00000143546;ENSG00000163220;ENSG00000169245	K10048+K05506+K21127+K21128+K12671
Organismal Systems	Immune system	Platelet activation	6	130	0.379186	1	ko04611	ENSG00000105499;ENSG00000110799;ENSG00000127533;ENSG00000169704;ENSG00000158869;ENSG00000005961	K16342+K03900+K04236+K06263+K07983+K06476
Organismal Systems	Immune system	NOD-like receptor signaling pathway	8	184	0.407259	1	ko04621	ENSG00000136869;ENSG00000103313;ENSG00000105835;ENSG00000163568;ENSG00000142405;ENSG00000111331;ENSG00000137757;ENSG00000271503	K10160+K12803+K03462+K12966+K20865+K14216+K04395+K12499
Organismal Systems	Immune system	Cytosolic DNA-sensing pathway	3	64	0.44559	1	ko04623	ENSG00000163568;ENSG00000169245;ENSG00000271503	K12966+K12671+K12499
Organismal Systems	Immune system	Th1 and Th2 cell differentiation	4	101	0.543974	1	ko04658	ENSG00000134460;ENSG00000090932;ENSG00000096996;ENSG00000010610	K05068+K06051+K05063+K06454
Organismal Systems	Immune system	B cell receptor signaling pathway	6	155	0.547354	1	ko04662	ENSG00000187116;ENSG00000239998;ENSG00000104974;ENSG00000244482;ENSG00000131042;ENSG00000104972	K06512+K06512+K06512+K06512+K06512+K06512
Organismal Systems	Immune system	Fc gamma R-mediated phagocytosis	6	170	0.638029	1	ko04666	ENSG00000101336;ENSG00000105499;ENSG00000277443;ENSG00000158517;ENSG00000162747;ENSG00000203747	K08893+K16342+K12561+K08011+K06463+K06463
Organismal Systems	Immune system	Intestinal immune network for IgA production	4	123	0.698423	1	ko04672	ENSG00000139626;ENSG00000114013;ENSG00000248871;ENSG00000136634	K06590+K05413+K05475+K05443
Organismal Systems	Immune system	Th17 cell differentiation	3	113	0.813058	1	ko04659	ENSG00000134460;ENSG00000096996;ENSG00000010610	K05068+K05063+K06454
Organismal Systems	Immune system	Fc epsilon RI signaling pathway	3	141	0.911052	1	ko04664	ENSG00000132965;ENSG00000105499;ENSG00000158869	K20735+K16342+K07983
Organismal Systems	Immune system	T cell receptor signaling pathway	2	111	0.929974	1	ko04660	ENSG00000010610;ENSG00000136634	K06454+K05443
Organismal Systems	Immune system	RIG-I-like receptor signaling pathway	1	71	0.938061	1	ko04622	ENSG00000169245	K12671
Organismal Systems	Aging	Longevity regulating pathway - multiple species	1	68	0.930301	1	ko04213	ENSG00000173110	K03283
Metabolism	Amino acid metabolism	Phenylalanine metabolism	2	18	0.149549	0.962	ko00360	ENSG00000158104;ENSG00000104951	K00457+K03334
Metabolism	Amino acid metabolism	Tyrosine metabolism	3	39	0.186291	1	ko00350	ENSG00000080166;ENSG00000158104;ENSG00000104951	K01827+K00457+K03334
Metabolism	Amino acid metabolism	Phenylalanine, tyrosine and tryptophan biosynthesis	1	6	0.208738	1	ko00400	ENSG00000104951	K03334
Metabolism	Amino acid metabolism	Histidine metabolism	2	24	0.233474	1	ko00340	ENSG00000150540;ENSG00000172508	K00546+K14755
Metabolism	Amino acid metabolism	Arginine and proline metabolism	3	52	0.320324	1	ko00330	ENSG00000104879;ENSG00000130066;ENSG00000172508	K00933+K00657+K14755
Metabolism	Amino acid metabolism	Alanine, aspartate and glutamate metabolism	2	40	0.456095	1	ko00250	ENSG00000166123;ENSG00000104951	K00814+K03334
Metabolism	Amino acid metabolism	Tryptophan metabolism	2	45	0.518352	1	ko00380	ENSG00000138061;ENSG00000104951	K07410+K03334
Metabolism	Amino acid metabolism	Arginine biosynthesis	1	24	0.60841	1	ko00220	ENSG00000166123	K00814
Metabolism	Amino acid metabolism	Valine, leucine and isoleucine degradation	1	50	0.858625	1	ko00280	ENSG00000104951	K03334
Metabolism	Amino acid metabolism	Cysteine and methionine metabolism	1	53	0.874331	1	ko00270	ENSG00000104951	K03334
Metabolism	Amino acid metabolism	Lysine degradation	1	64	0.918428	1	ko00310	ENSG00000115593	K11426
Metabolism	Biosynthesis of other secondary metabolites	Neomycin, kanamycin and gentamicin biosynthesis	1	5	0.177242	1	ko00524	ENSG00000160883	K00844
Human Diseases	Cancer: overview	PD-L1 expression and PD-1 checkpoint pathway in cancer	3	99	0.73646	1	ko05235	ENSG00000136869;ENSG00000168062;ENSG00000010610	K10160+K09034+K06454
Human Diseases	Cancers	Proteoglycans in cancer	14	212	0.032702	0.403	ko05205	ENSG00000122691;ENSG00000124145;ENSG00000147257;ENSG00000137801;ENSG00000087245;ENSG00000019991;ENSG00000136869;ENSG00000135047;ENSG00000104290;ENSG00000185920;ENSG00000128602;ENSG00000173083;ENSG00000164690;ENSG00000070808	K09069+K16338+K08109+K16857+K01398+K05460+K10160+K01365+K02329+K06225+K06226+K07964+K11988+K04515
Human Diseases	Cancers	Basal cell carcinoma	6	64	0.034942	0.412	ko05217	ENSG00000125378;ENSG00000164161;ENSG00000104290;ENSG00000185920;ENSG00000128602;ENSG00000164690	K04662+K06231+K02329+K06225+K06226+K11988
Human Diseases	Cancers	Bladder cancer	4	42	0.075464	0.682	ko05219	ENSG00000100373;ENSG00000137801;ENSG00000087245;ENSG00000025708	K19520+K16857+K01398+K00758
Human Diseases	Cancers	Acute myeloid leukemia	5	72	0.140707	0.962	ko05221	ENSG00000139318;ENSG00000169896;ENSG00000005381;ENSG00000140379;ENSG00000170458	K21946+K06461+K10789+K02162+K04391
Human Diseases	Cancers	Chemical carcinogenesis	5	86	0.232334	1	ko05204	ENSG00000159228;ENSG00000151632;ENSG00000138061;ENSG00000160868;ENSG00000021461	K00079+K00089+K07410+K17689+K17692
Human Diseases	Cancers	Pathways in cancer	23	552	0.365159	1	ko05200	ENSG00000134460;ENSG00000125378;ENSG00000165879;ENSG00000100292;ENSG00000087245;ENSG00000019991;ENSG00000119630;ENSG00000167083;ENSG00000163235;ENSG00000164161;ENSG00000090932;ENSG00000096996;ENSG00000135862;ENSG00000187266;ENSG00000104290;ENSG00000185920;ENSG00000128602;ENSG00000168243;ENSG00000196878;ENSG00000164690;ENSG00000070808;ENSG00000127533;ENSG00000005961	K05068+K04662+K03069+K00510+K01398+K05460+K16859+K04549+K08774+K06231+K06051+K05063+K05635+K05079+K02329+K06225+K06226+K04541+K06244+K11988+K04515+K04236+K06476
Human Diseases	Cancers	Transcriptional misregulation in cancers	11	268	0.449643	1	ko05202	ENSG00000172216;ENSG00000100625;ENSG00000139626;ENSG00000139318;ENSG00000197561;ENSG00000104313;ENSG00000114013;ENSG00000169896;ENSG00000005381;ENSG00000140379;ENSG00000170458	K10048+K15615+K06590+K21946+K01327+K15616+K05413+K06461+K10789+K02162+K04391
Human Diseases	Cancers	MicroRNAs in cancer	6	176	0.67114	1	ko05206	ENSG00000137801;ENSG00000100292;ENSG00000138061;ENSG00000277443;ENSG00000104290;ENSG00000149418	K16857+K00510+K07410+K12561+K02329+K08670
Human Diseases	Cancers	Small cell lung cancer	3	94	0.703698	1	ko05222	ENSG00000135862;ENSG00000196878;ENSG00000005961	K05635+K06244+K06476
Human Diseases	Cancers	Renal cell carcinoma	2	75	0.787732	1	ko05211	ENSG00000019991;ENSG00000163235	K05460+K08774
Human Diseases	Cancers	Hepatocellular carcinoma	5	172	0.793512	1	ko05225	ENSG00000165879;ENSG00000100292;ENSG00000019991;ENSG00000163235;ENSG00000104290	K03069+K00510+K05460+K08774+K02329
Human Diseases	Cancers	Glioma	2	79	0.811334	1	ko05214	ENSG00000163235;ENSG00000070808	K08774+K04515
Human Diseases	Cancers	Gastric cancer	4	153	0.843042	1	ko05226	ENSG00000165879;ENSG00000019991;ENSG00000104290;ENSG00000164690	K03069+K05460+K02329+K11988
Human Diseases	Cancers	Non-small cell lung cancer	1	70	0.935575	1	ko05223	ENSG00000163235	K08774
Human Diseases	Cancers	Breast cancer	3	156	0.941709	1	ko05224	ENSG00000165879;ENSG00000090932;ENSG00000104290	K03069+K06051+K02329
Human Diseases	Cancers	Central carbon metabolism in cancer	1	74	0.944959	1	ko05230	ENSG00000160883	K00844
Human Diseases	Cancers	Melanoma	1	76	0.949126	1	ko05218	ENSG00000019991	K05460
Human Diseases	Cancers	Pancreatic cancer	1	81	0.95822	1	ko05212	ENSG00000163235	K08774
Human Diseases	Cancers	Colorectal cancer	1	94	0.974976	1	ko05210	ENSG00000163235	K08774
Human Diseases	Cancers	Prostate cancer	1	103	0.98246	1	ko05215	ENSG00000163235	K08774
Human Diseases	Cancers	Choline metabolism in cancer	1	107	0.985025	1	ko05231	ENSG00000105499	K16342
Human Diseases	Cancers	Viral carcinogenesis	2	209	0.99753	1	ko05203	ENSG00000125730;ENSG00000122877	K03990+K12496
Metabolism	Carbohydrate metabolism	Galactose metabolism	3	33	0.130682	0.962	ko00052	ENSG00000227471;ENSG00000160883;ENSG00000115850	K00011+K00844+K01229
Metabolism	Carbohydrate metabolism	Fructose and mannose metabolism	3	35	0.14852	0.962	ko00051	ENSG00000227471;ENSG00000160883;ENSG00000165140	K00011+K00844+K03841
Metabolism	Carbohydrate metabolism	Amino sugar and nucleotide sugar metabolism	3	51	0.309735	1	ko00520	ENSG00000160883;ENSG00000166394;ENSG00000135838	K00844+K00326+K01639
Metabolism	Carbohydrate metabolism	Pentose phosphate pathway	2	31	0.333695	1	ko00030	ENSG00000151005;ENSG00000165140	K00615+K03841
Metabolism	Carbohydrate metabolism	Citrate cycle (TCA cycle)	2	32	0.347803	1	ko00020	ENSG00000197444;ENSG00000172340	K00164+K01900
Metabolism	Carbohydrate metabolism	Propanoate metabolism	2	36	0.403107	1	ko00640	ENSG00000111058;ENSG00000172340	K01908+K01900
Metabolism	Carbohydrate metabolism	Butanoate metabolism	1	28	0.665147	1	ko00650	ENSG00000166743	K23756
Metabolism	Carbohydrate metabolism	Pentose and glucuronate interconversions	1	35	0.745428	1	ko00040	ENSG00000227471	K00011
Metabolism	Carbohydrate metabolism	Glycolysis / Gluconeogenesis	2	71	0.761576	1	ko00010	ENSG00000160883;ENSG00000165140	K00844+K03841
Metabolism	Carbohydrate metabolism	Starch and sucrose metabolism	1	37	0.764614	1	ko00500	ENSG00000160883	K00844
Metabolism	Carbohydrate metabolism	Pyruvate metabolism	1	41	0.79877	1	ko00620	ENSG00000172497	K01067
Metabolism	Carbohydrate metabolism	Inositol phosphate metabolism	1	75	0.947083	1	ko00562	ENSG00000155252	K13711
Human Diseases	Cardiovascular diseases	Arrhythmogenic right ventricular cardiomyopathy (ARVC)	9	79	0.003056	0.0637	ko05412	ENSG00000170558;ENSG00000139626;ENSG00000183023;ENSG00000151062;ENSG00000115221;ENSG00000135424;ENSG00000130433;ENSG00000005961;ENSG00000160789	K06736+K06590+K05849+K04861+K06589+K06583+K04871+K06476+K12641
Human Diseases	Cardiovascular diseases	Hypertrophic cardiomyopathy (HCM)	9	93	0.008973	0.128	ko05410	ENSG00000139626;ENSG00000183023;ENSG00000151062;ENSG00000115221;ENSG00000135424;ENSG00000159640;ENSG00000130433;ENSG00000005961;ENSG00000160789	K06590+K05849+K04861+K06589+K06583+K01283+K04871+K06476+K12641
Human Diseases	Cardiovascular diseases	Fluid shear stress and atherosclerosis	9	142	0.09406	0.772	ko05418	ENSG00000124145;ENSG00000125378;ENSG00000100292;ENSG00000087245;ENSG00000135047;ENSG00000111199;ENSG00000158517;ENSG00000116701;ENSG00000005961	K16338+K04662+K00510+K01398+K01365+K04973+K08011+K08010+K06476
Human Diseases	Cardiovascular diseases	Dilated cardiomyopathy (DCM)	8	168	0.314056	1	ko05414	ENSG00000139626;ENSG00000183023;ENSG00000151062;ENSG00000115221;ENSG00000135424;ENSG00000130433;ENSG00000005961;ENSG00000160789	K06590+K05849+K04861+K06589+K06583+K04871+K06476+K12641
Human Diseases	Cardiovascular diseases	Viral myocarditis	3	133	0.889291	1	ko05416	ENSG00000160255;ENSG00000114013;ENSG00000005844	K06464+K05413+K05718
Cellular Processes	Cell growth and death	Ferroptosis	3	43	0.226221	1	ko04216	ENSG00000167996;ENSG00000100292;ENSG00000130066	K00522+K00510+K00657
Cellular Processes	Cell growth and death	Apoptosis	7	142	0.300812	1	ko04210	ENSG00000135047;ENSG00000136943;ENSG00000140379;ENSG00000117984;ENSG00000174080;ENSG00000163131;ENSG00000160789	K01365+K01375+K02162+K01379+K01373+K01368+K12641
Cellular Processes	Cell growth and death	p53 signaling pathway	2	72	0.768365	1	ko04115	ENSG00000137801;ENSG00000181790	K16857+K04596
Cellular Processes	Cell growth and death	Necroptosis	5	167	0.771888	1	ko04217	ENSG00000167996;ENSG00000136869;ENSG00000105499;ENSG00000099284;ENSG00000070808	K00522+K10160+K16342+K11251+K04515
Cellular Processes	Cell growth and death	Cellular senescence	2	166	0.988838	1	ko04218	ENSG00000189013;ENSG00000111199	K07981+K04973
Cellular Processes	Cell growth and death	Oocyte meiosis	1	139	0.995783	1	ko04114	ENSG00000070808	K04515
Cellular Processes	Cell motility	Regulation of actin cytoskeleton	8	221	0.614811	1	ko04810	ENSG00000160255;ENSG00000139626;ENSG00000169896;ENSG00000140678;ENSG00000115221;ENSG00000005844;ENSG00000135424;ENSG00000005961	K06464+K06590+K06461+K06462+K06589+K05718+K06583+K06476
Cellular Processes	Cellular community - eukaryotes	Focal adhesion	12	205	0.094057	0.772	ko04510	ENSG00000137801;ENSG00000019991;ENSG00000139626;ENSG00000119630;ENSG00000135862;ENSG00000115221;ENSG00000139219;ENSG00000110799;ENSG00000196878;ENSG00000135424;ENSG00000049089;ENSG00000005961	K16857+K05460+K06590+K16859+K05635+K06589+K19719+K03900+K06244+K06583+K08131+K06476
Cellular Processes	Cellular community - eukaryotes	Adherens junction	2	72	0.768365	1	ko04520	ENSG00000148498;ENSG00000143217	K04237+K06593
Cellular Processes	Cellular community - eukaryotes	Tight junction	5	176	0.809635	1	ko04530	ENSG00000253958;ENSG00000148498;ENSG00000185758;ENSG00000158473;ENSG00000113946	K06087+K04237+K06087+K06448+K06087
Cellular Processes	Cellular community - eukaryotes	Signaling pathways regulating pluripotency of stem cells	3	150	0.930848	1	ko04550	ENSG00000125378;ENSG00000136826;ENSG00000104290	K04662+K17846+K02329
Cellular Processes	Cellular community - eukaryotes	Gap junction	1	93	0.973969	1	ko04540	ENSG00000104833	K07375
Organismal Systems	Circulatory system	Adrenergic signaling in cardiomyocytes	7	152	0.363098	1	ko04261	ENSG00000053918;ENSG00000180509;ENSG00000276289;ENSG00000183023;ENSG00000151062;ENSG00000070808;ENSG00000130433	K04926+K04894+K04894+K05849+K04861+K04515+K04871
Organismal Systems	Circulatory system	Cardiac muscle contraction	3	91	0.682601	1	ko04260	ENSG00000183023;ENSG00000151062;ENSG00000130433	K05849+K04861+K04871
Organismal Systems	Circulatory system	Vascular smooth muscle contraction	4	135	0.765185	1	ko04270	ENSG00000105499;ENSG00000110680;ENSG00000163017;ENSG00000198049	K16342+K12332+K12315+K04227
Organismal Systems	Development	Osteoclast differentiation	12	133	0.004847	0.0938	ko04380	ENSG00000101307;ENSG00000187116;ENSG00000239998;ENSG00000104974;ENSG00000184371;ENSG00000158517;ENSG00000244482;ENSG00000131042;ENSG00000116701;ENSG00000104972;ENSG00000162747;ENSG00000203747	K06551+K06512+K06512+K06512+K05453+K08011+K06512+K06512+K08010+K06512+K06463+K06463
Organismal Systems	Development	Axon guidance	15	187	0.005302	0.0958	ko04360	ENSG00000196220;ENSG00000185008;ENSG00000198753;ENSG00000148498;ENSG00000113763;ENSG00000108947;ENSG00000104290;ENSG00000185920;ENSG00000128602;ENSG00000167680;ENSG00000164690;ENSG00000070808;ENSG00000164050;ENSG00000154928;ENSG00000133216	K07526+K06754+K06821+K04237+K07521+K05463+K02329+K06225+K06226+K06842+K11988+K04515+K06821+K05110+K05111
Organismal Systems	Development and regeneration	Axon regeneration	1	17	0.485111	1	ko04361	ENSG00000186094	K23439
Organismal Systems	Digestive system	Cholesterol metabolism	8	54	0.00094	0.0255	ko04979	ENSG00000100300;ENSG00000135218;ENSG00000123384;ENSG00000134243;ENSG00000130164;ENSG00000107798;ENSG00000224916;ENSG00000158874	K05770+K06259+K04550+K12388+K12473+K01052+K22287+K08758
Organismal Systems	Digestive system	Bile secretion	5	74	0.152693	0.962	ko04976	ENSG00000108846;ENSG00000103569;ENSG00000130164;ENSG00000160868;ENSG00000070031	K05667+K09877+K12473+K17689+K05263
Organismal Systems	Digestive system	Mineral absorption	4	61	0.20428	1	ko04978	ENSG00000167996;ENSG00000100292;ENSG00000183023;ENSG00000111424	K00522+K00510+K05849+K08539
Organismal Systems	Digestive system	Vitamin digestion and absorption	2	25	0.247814	1	ko04977	ENSG00000185339;ENSG00000101276	K14619+K14620
Organismal Systems	Digestive system	Protein digestion and absorption	5	97	0.313402	1	ko04974	ENSG00000053918;ENSG00000183023;ENSG00000155465;ENSG00000139219;ENSG00000049089	K04926+K05849+K13867+K19719+K08131
Organismal Systems	Digestive system	Gastric acid secretion	3	77	0.569766	1	ko04971	ENSG00000053918;ENSG00000180616;ENSG00000070808	K04926+K04218+K04515
Organismal Systems	Digestive system	Carbohydrate digestion and absorption	2	50	0.575696	1	ko04973	ENSG00000160883;ENSG00000115850	K00844+K01229
Organismal Systems	Digestive system	Pancreatic secretion	3	105	0.771928	1	ko04972	ENSG00000041353;ENSG00000053918;ENSG00000070031	K07886+K04926+K05263
Organismal Systems	Digestive system	Fat digestion and absorption	1	41	0.79877	1	ko04975	ENSG00000135218	K06259
Organismal Systems	Digestive system	Salivary secretion	2	93	0.876545	1	ko04970	ENSG00000090382;ENSG00000167419	K13915+K12550
Human Diseases	Drug resistance	Antifolate resistance	2	31	0.333695	1	ko01523	ENSG00000108846;ENSG00000165457	K05667+K13649
Human Diseases	Drug resistance	EGFR tyrosine kinase inhibitor resistance	2	85	0.842364	1	ko01521	ENSG00000019991;ENSG00000163235	K05460+K08774
Human Diseases	Drug resistance	Endocrine resistance	2	104	0.912476	1	ko01522	ENSG00000087245;ENSG00000090932	K01398+K06051
Human Diseases	Endocrine and metabolic diseases	Type I diabetes mellitus	1	48	0.847082	1	ko04940	ENSG00000114013	K05413
Human Diseases	Endocrine and metabolic diseases	Type II diabetes mellitus	1	50	0.858625	1	ko04930	ENSG00000160883	K00844
Human Diseases	Endocrine and metabolic diseases	Cushing syndrome	3	163	0.952378	1	ko04934	ENSG00000130164;ENSG00000104290;ENSG00000070808	K12473+K02329+K04515
Human Diseases	Endocrine and metabolic diseases	AGE-RAGE signaling pathway in diabetic complications	1	103	0.98246	1	ko04933	ENSG00000087245	K01398
Human Diseases	Endocrine and metabolic diseases	Insulin resistance	1	114	0.988646	1	ko04931	ENSG00000135218	K06259
Human Diseases	Endocrine and metabolic diseases	Non-alcoholic fatty liver disease (NAFLD)	1	164	0.998439	1	ko04932	ENSG00000174697	K05424
Organismal Systems	Endocrine system	Renin-angiotensin system	2	24	0.233474	1	ko04614	ENSG00000130368;ENSG00000159640	K04303+K01283
Organismal Systems	Endocrine system	Ovarian Steroidogenesis	3	55	0.35208	1	ko04913	ENSG00000138061;ENSG00000105499;ENSG00000130164	K07410+K16342+K12473
Organismal Systems	Endocrine system	Oxytocin signaling pathway	7	159	0.407337	1	ko04921	ENSG00000157542;ENSG00000105499;ENSG00000196218;ENSG00000151062;ENSG00000116741;ENSG00000070808;ENSG00000130433	K05000+K16342+K04961+K04861+K18154+K04515+K04871
Organismal Systems	Endocrine system	Adipocytokine signaling pathway	3	70	0.504924	1	ko04920	ENSG00000028137;ENSG00000135218;ENSG00000174697	K05141+K06259+K05424
Organismal Systems	Endocrine system	Parathyroid hormone synthesis, secretion and action	4	109	0.60473	1	ko04928	ENSG00000065989;ENSG00000204103;ENSG00000124827;ENSG00000111424	K13293+K09036+K21598+K08539
Organismal Systems	Endocrine system	Estrogen signaling pathway	5	141	0.632048	1	ko04915	ENSG00000157542;ENSG00000087245;ENSG00000163235;ENSG00000117984;ENSG00000173110	K05000+K01398+K08774+K01379+K03283
Organismal Systems	Endocrine system	GnRH signaling pathway	3	94	0.703698	1	ko04912	ENSG00000087245;ENSG00000105499;ENSG00000070808	K01398+K16342+K04515
Organismal Systems	Endocrine system	Aldosterone synthesis and secretion	3	99	0.73646	1	ko04925	ENSG00000186642;ENSG00000130164;ENSG00000070808	K18283+K12473+K04515
Organismal Systems	Endocrine system	Melanogenesis	3	102	0.754708	1	ko04916	ENSG00000080166;ENSG00000104290;ENSG00000070808	K01827+K02329+K04515
Organismal Systems	Endocrine system	Renin secretion	2	73	0.774985	1	ko04924	ENSG00000154678;ENSG00000159640	K13755+K01283
Organismal Systems	Endocrine system	PPAR signaling pathway	2	80	0.816858	1	ko03320	ENSG00000135218;ENSG00000158874	K06259+K08758
Organismal Systems	Endocrine system	Insulin secretion	2	91	0.868703	1	ko04911	ENSG00000130529;ENSG00000070808	K04979+K04515
Organismal Systems	Endocrine system	Relaxin signaling pathway	3	135	0.895137	1	ko04926	ENSG00000087245;ENSG00000167083;ENSG00000168243	K01398+K04549+K04541
Organismal Systems	Endocrine system	Cortisol synthesis and secretion	1	66	0.924598	1	ko04927	ENSG00000130164	K12473
Organismal Systems	Endocrine system	Glucagon signaling pathway	2	109	0.925344	1	ko04922	ENSG00000165140;ENSG00000070808	K03841+K04515
Organismal Systems	Endocrine system	GnRH secretion	1	67	0.927505	1	ko04929	ENSG00000157542	K05000
Organismal Systems	Endocrine system	Thyroid hormone synthesis	1	74	0.944959	1	ko04918	ENSG00000161944	K10064
Organismal Systems	Endocrine system	Growth hormone synthesis, secretion and action	2	124	0.954068	1	ko04935	ENSG00000180616;ENSG00000121853	K04218+K04284
Organismal Systems	Endocrine system	Thyroid hormone signaling pathway	2	129	0.961036	1	ko04919	ENSG00000147100;ENSG00000125378	K08231+K04662
Organismal Systems	Endocrine system	Insulin signaling pathway	2	145	0.977158	1	ko04910	ENSG00000160883;ENSG00000165140	K00844+K03841
Metabolism	Energy metabolism	Sulfur metabolism	1	11	0.349076	1	ko00920	ENSG00000198682	K13811
Metabolism	Energy metabolism	Oxidative phosphorylation	2	145	0.977158	1	ko00190	ENSG00000075673;ENSG00000110719	K01544+K02154
Organismal Systems	Environmental adaptation	Circadian entrainment	5	102	0.351515	1	ko04713	ENSG00000157542;ENSG00000167083;ENSG00000196218;ENSG00000168243;ENSG00000070808	K05000+K04549+K04961+K04541+K04515
Organismal Systems	Excretory system	Endocrine and other factor-regulated calcium reabsorption	2	54	0.617879	1	ko04961	ENSG00000183023;ENSG00000111424	K05849+K08539
Organismal Systems	Excretory system	Proximal tubule bicarbonate reclamation	1	27	0.651782	1	ko04964	ENSG00000188338	K13576
Organismal Systems	Excretory system	Collecting duct acid secretion	1	27	0.651782	1	ko04966	ENSG00000110719	K02154
Organismal Systems	Excretory system	Aldosterone-regulated sodium reabsorption	1	42	0.806507	1	ko04960	ENSG00000118515	K13302
Genetic Information Processing	Folding, sorting and degradation	SNARE interactions in vesicular transport	1	36	0.755208	1	ko04130	ENSG00000135604	K08487
Genetic Information Processing	Folding, sorting and degradation	Protein processing in endoplasmic reticulum	4	168	0.890229	1	ko04141	ENSG00000101251;ENSG00000147570;ENSG00000164070;ENSG00000173110	K14026+K09525+K09485+K03283
Metabolism	Global and overview maps	Carbon metabolism	6	123	0.331082	1	ko01200	ENSG00000166123;ENSG00000160883;ENSG00000151005;ENSG00000197444;ENSG00000165140;ENSG00000172340	K00814+K00844+K00615+K00164+K03841+K01900
Metabolism	Global and overview maps	2-Oxocarboxylic acid metabolism	1	19	0.523835	1	ko01210	ENSG00000166123	K00814
Metabolism	Global and overview maps	Biosynthesis of amino acids	2	79	0.811334	1	ko01230	ENSG00000166123;ENSG00000151005	K00814+K00615
Metabolism	Global and overview maps	Metabolic pathways	49	1554	0.9486	1	ko01100	ENSG00000133475;ENSG00000080166;ENSG00000100344;ENSG00000159228;ENSG00000075673;ENSG00000100031;ENSG00000070019;ENSG00000165092;ENSG00000065989;ENSG00000155252;ENSG00000186115;ENSG00000183696;ENSG00000110719;ENSG00000166123;ENSG00000100292;ENSG00000172497;ENSG00000154678;ENSG00000111058;ENSG00000128242;ENSG00000186642;ENSG00000104879;ENSG00000025708;ENSG00000105499;ENSG00000158104;ENSG00000227471…	K18592+K01827+K13534+K00079+K01544+K18592+K12320+K07249+K13293+K13711+K17726+K00757+K02154+K00814+K00510+K01067+K13755+K01908+K01019+K18283+K00933+K00758+K16342+K00457+K00011+K16860+K11426+K03334+K00844+K00657+K00546+K00615+K17689+K01565+K00164+K13811+K03841+K14755+K01900+K12321+K03462+K07964+K23756+K11149+K01489+K00681+K04714+K01229+K01639
Metabolism	Glycan biosynthesis and metabolism	Glycosaminoglycan degradation	2	21	0.190878	1	ko00531	ENSG00000181523;ENSG00000173083	K01565+K07964
Metabolism	Glycan biosynthesis and metabolism	Glycosaminoglycan biosynthesis - keratan sulfate	1	14	0.421063	1	ko00533	ENSG00000140835	K04746
Metabolism	Glycan biosynthesis and metabolism	Glycosaminoglycan biosynthesis - chondroitin sulfate / dermatan sulfate	1	21	0.559655	1	ko00532	ENSG00000182022	K08106
Metabolism	Glycan biosynthesis and metabolism	Other types of O-glycan biosynthesis	1	47	0.840963	1	ko00514	ENSG00000172986	K13676
Human Diseases	Infectious disease: bacterial	Yersinia infection	4	128	0.727758	1	ko05135	ENSG00000136869;ENSG00000103313;ENSG00000214944;ENSG00000136634	K10160+K12803+K21072+K05443
Human Diseases	Infectious disease: viral	Human immunodeficiency virus 1 infection	8	225	0.635029	1	ko05170	ENSG00000128383;ENSG00000100298;ENSG00000028137;ENSG00000136869;ENSG00000167083;ENSG00000101347;ENSG00000010610;ENSG00000168243	K18750+K18750+K05141+K10160+K04549+K22544+K06454+K04541
Human Diseases	Infectious diseases	Malaria	9	55	0.000211	0.00805	ko05144	ENSG00000160255;ENSG00000137801;ENSG00000019991;ENSG00000135218;ENSG00000136869;ENSG00000123384;ENSG00000005844;ENSG00000136634;ENSG00000203710	K06464+K16857+K05460+K06259+K10160+K04550+K05718+K05443+K04011
Human Diseases	Infectious diseases	Tuberculosis	21	257	0.000826	0.0249	ko05152	ENSG00000172216;ENSG00000260314;ENSG00000160255;ENSG00000172243;ENSG00000110719;ENSG00000136869;ENSG00000125730;ENSG00000169896;ENSG00000140678;ENSG00000170458;ENSG00000090659;ENSG00000111424;ENSG00000117984;ENSG00000070808;ENSG00000158869;ENSG00000162747;ENSG00000011028;ENSG00000136634;ENSG00000203747;ENSG00000203710;ENSG00000163131	K10048+K06560+K06464+K10074+K02154+K10160+K03990+K06461+K06462+K04391+K06563+K08539+K01379+K04515+K07983+K06463+K06560+K05443+K06463+K04011+K01368
Human Diseases	Infectious diseases	Legionellosis	8	58	0.001518	0.0374	ko05134	ENSG00000160255;ENSG00000136869;ENSG00000125730;ENSG00000169896;ENSG00000170458;ENSG00000187554;ENSG00000173110;ENSG00000203710	K06464+K10160+K03990+K06461+K04391+K10168+K03283+K04011
Human Diseases	Infectious diseases	Pertussis	9	78	0.002799	0.0632	ko05133	ENSG00000160255;ENSG00000136869;ENSG00000124875;ENSG00000125730;ENSG00000169896;ENSG00000170458;ENSG00000166278;ENSG00000173372;ENSG00000136634	K06464+K10160+K05506+K03990+K06461+K04391+K01332+K03986+K05443
Human Diseases	Infectious diseases	Staphylococcus aureus infection	14	173	0.006449	0.109	ko05150	ENSG00000160255;ENSG00000171860;ENSG00000169403;ENSG00000197405;ENSG00000125730;ENSG00000169896;ENSG00000171049;ENSG00000171051;ENSG00000005844;ENSG00000166278;ENSG00000173372;ENSG00000162747;ENSG00000136634;ENSG00000203747	K06464+K04009+K04279+K04010+K03990+K06461+K04173+K04172+K05718+K01332+K03986+K06463+K05443+K06463
Human Diseases	Infectious diseases	Leishmaniasis	10	149	0.059378	0.619	ko05140	ENSG00000160255;ENSG00000136869;ENSG00000125730;ENSG00000169896;ENSG00000158517;ENSG00000116701;ENSG00000162747;ENSG00000136634;ENSG00000203747;ENSG00000203710	K06464+K10160+K03990+K06461+K08011+K08010+K06463+K05443+K06463+K04011
Human Diseases	Infectious diseases	Chagas disease (American trypanosomiasis)	6	109	0.238367	1	ko05142	ENSG00000136869;ENSG00000125730;ENSG00000159640;ENSG00000173372;ENSG00000136634;ENSG00000271503	K10160+K03990+K01283+K03986+K05443+K12499
Human Diseases	Infectious diseases	Toxoplasmosis	6	113	0.264111	1	ko05145	ENSG00000136869;ENSG00000130164;ENSG00000135862;ENSG00000196878;ENSG00000173110;ENSG00000136634	K10160+K12473+K05635+K06244+K03283+K05443
Human Diseases	Infectious diseases	Human papillomavirus infection	15	346	0.345888	1	ko05165	ENSG00000173673;ENSG00000137801;ENSG00000110719;ENSG00000139626;ENSG00000148498;ENSG00000135862;ENSG00000115221;ENSG00000104290;ENSG00000139219;ENSG00000110799;ENSG00000196878;ENSG00000135424;ENSG00000135114;ENSG00000049089;ENSG00000005961	K09088+K16857+K02154+K06590+K04237+K05635+K06589+K02329+K19719+K03900+K06244+K06583+K14608+K08131+K06476
Human Diseases	Infectious diseases	Amoebiasis	8	177	0.366176	1	ko05146	ENSG00000160255;ENSG00000136869;ENSG00000169896;ENSG00000135862;ENSG00000158473;ENSG00000170458;ENSG00000196878;ENSG00000136634	K06464+K10160+K06461+K05635+K06448+K04391+K06244+K05443
Human Diseases	Infectious diseases	Hepatitis C	7	163	0.432594	1	ko05160	ENSG00000253958;ENSG00000130164;ENSG00000185758;ENSG00000185745;ENSG00000113946;ENSG00000169245;ENSG00000111331	K06087+K12473+K06087+K14217+K06087+K12671+K14216
Human Diseases	Infectious diseases	Epithelial cell signaling in Helicobacter pylori infection	3	70	0.504924	1	ko05120	ENSG00000110719;ENSG00000180871;ENSG00000271503	K02154+K05050+K12499
Human Diseases	Infectious diseases	Measles	6	150	0.514985	1	ko05162	ENSG00000134460;ENSG00000196664;ENSG00000136869;ENSG00000090659;ENSG00000111331;ENSG00000173110	K05068+K05404+K10160+K06563+K14216+K03283
Human Diseases	Infectious diseases	Vibrio cholerae infection	2	51	0.586551	1	ko05110	ENSG00000053918;ENSG00000110719	K04926+K02154
Human Diseases	Infectious diseases	Kaposi sarcoma-associated herpesvirus infection	7	194	0.617279	1	ko05167	ENSG00000163606;ENSG00000101336;ENSG00000167083;ENSG00000114013;ENSG00000125730;ENSG00000168243;ENSG00000163823	K21668+K08893+K04549+K05413+K03990+K04541+K04176
Human Diseases	Infectious diseases	Influenza A	6	179	0.686957	1	ko05164	ENSG00000196664;ENSG00000136869;ENSG00000205022;ENSG00000169245;ENSG00000111331;ENSG00000271503	K05404+K10160+K14396+K12671+K14216+K12499
Human Diseases	Infectious diseases	HTLV-I infection	7	231	0.787143	1	ko05166	ENSG00000134460;ENSG00000100300;ENSG00000160255;ENSG00000137673;ENSG00000010610;ENSG00000005844;ENSG00000122877	K05068+K05770+K06464+K01397+K06454+K05718+K12496
Human Diseases	Infectious diseases	Shigellosis	7	251	0.851895	1	ko05131	ENSG00000165474;ENSG00000136869;ENSG00000125730;ENSG00000160883;ENSG00000170458;ENSG00000187554;ENSG00000271503	K07621+K10160+K03990+K00844+K04391+K10168+K12499
Human Diseases	Infectious diseases	Pathogenic Escherichia coli infection	7	285	0.924923	1	ko05130	ENSG00000253958;ENSG00000136869;ENSG00000101336;ENSG00000104833;ENSG00000185758;ENSG00000113946;ENSG00000187554	K06087+K10160+K08893+K07375+K06087+K06087+K10168
Human Diseases	Infectious diseases	Salmonella infection	5	224	0.934968	1	ko05132	ENSG00000136869;ENSG00000170458;ENSG00000137757;ENSG00000187554;ENSG00000139132	K10160+K04391+K04395+K10168+K05723
Human Diseases	Infectious diseases	Human cytomegalovirus infection	5	234	0.949028	1	ko05163	ENSG00000167083;ENSG00000180871;ENSG00000168243;ENSG00000163823;ENSG00000271503	K04549+K05050+K04541+K04176+K12499
Human Diseases	Infectious diseases	African trypanosomiasis	1	108	0.985605	1	ko05143	ENSG00000136634	K05443
Human Diseases	Infectious diseases	Hepatitis B	2	167	0.989216	1	ko05161	ENSG00000136869;ENSG00000122877	K10160+K12496
Human Diseases	Infectious diseases	Epstein-Barr virus infection	3	282	0.998904	1	ko05169	ENSG00000005844;ENSG00000169245;ENSG00000111331	K05718+K12671+K14216
Human Diseases	Infectious diseases	Herpes simplex infection	4	573	1	1	ko05168	ENSG00000125730;ENSG00000236609;ENSG00000111331;ENSG00000271503	K03990+K09228+K14216+K12499
Metabolism	Lipid metabolism	Arachidonic acid metabolism	5	70	0.129155	0.962	ko00590	ENSG00000133475;ENSG00000159228;ENSG00000100031;ENSG00000186115;ENSG00000105499	K18592+K00079+K18592+K17726+K16342
Metabolism	Lipid metabolism	Steroid hormone biosynthesis	4	65	0.236942	1	ko00140	ENSG00000101846;ENSG00000151632;ENSG00000138061;ENSG00000160868	K01131+K00089+K07410+K17689
Metabolism	Lipid metabolism	Ether lipid metabolism	3	49	0.288602	1	ko00565	ENSG00000128242;ENSG00000105499;ENSG00000105223	K01019+K16342+K16860
Metabolism	Lipid metabolism	Linoleic acid metabolism	2	30	0.3195	1	ko00591	ENSG00000105499;ENSG00000160868	K16342+K17689
Metabolism	Lipid metabolism	Sphingolipid metabolism	2	49	0.564634	1	ko00600	ENSG00000128242;ENSG00000164023	K01019+K04714
Metabolism	Lipid metabolism	Steroid biosynthesis	1	23	0.592787	1	ko00100	ENSG00000107798	K01052
Metabolism	Lipid metabolism	alpha-Linolenic acid metabolism	1	26	0.637885	1	ko00592	ENSG00000105499	K16342
Metabolism	Lipid metabolism	Glycerolipid metabolism	2	65	0.71715	1	ko00561	ENSG00000100344;ENSG00000227471	K13534+K00011
Metabolism	Lipid metabolism	Glycerophospholipid metabolism	2	101	0.903788	1	ko00564	ENSG00000105499;ENSG00000105223	K16342+K16860
Environmental Information Processing	Membrane transport	ABC transporters	1	46	0.8346	1	ko02010	ENSG00000108846	K05667
Metabolism	Metabolism of cofactors and vitamins	Lipoic acid metabolism	1	4	0.144496	0.962	ko00785	ENSG00000166743	K23756
Metabolism	Metabolism of cofactors and vitamins	Pantothenate and CoA biosynthesis	2	19	0.163129	1	ko00770	ENSG00000112299;ENSG00000112303	K08069+K08069
Metabolism	Metabolism of cofactors and vitamins	Folate biosynthesis	2	28	0.290913	1	ko00790	ENSG00000159228;ENSG00000227471	K00079+K00011
Metabolism	Metabolism of cofactors and vitamins	Ubiquinone and other terpenoid-quinone biosynthesis	1	12	0.374012	1	ko00130	ENSG00000158104	K00457
Metabolism	Metabolism of cofactors and vitamins	Retinol metabolism	3	68	0.485493	1	ko00830	ENSG00000165092;ENSG00000160868;ENSG00000073737	K07249+K17689+K11149
Metabolism	Metabolism of cofactors and vitamins	Nicotinate and nicotinamide metabolism	1	38	0.77366	1	ko00760	ENSG00000105835	K03462
Metabolism	Metabolism of cofactors and vitamins	Porphyrin and chlorophyll metabolism	1	44	0.821102	1	ko00860	ENSG00000100292	K00510
Metabolism	Metabolism of other amino acids	Taurine and hypotaurine metabolism	3	15	0.017926	0.243	ko00430	ENSG00000133475;ENSG00000100031;ENSG00000167741	K18592+K18592+K00681
Metabolism	Metabolism of other amino acids	Glutathione metabolism	3	61	0.414885	1	ko00480	ENSG00000133475;ENSG00000100031;ENSG00000167741	K18592+K18592+K00681
Metabolism	Metabolism of other amino acids	Selenocompound metabolism	1	19	0.523835	1	ko00450	ENSG00000198682	K13811
Metabolism	Metabolism of other amino acids	beta-Alanine metabolism	1	32	0.713686	1	ko00410	ENSG00000172508	K14755
Organismal Systems	Nervous system	GABAergic synapse	6	92	0.139986	0.962	ko04727	ENSG00000157542;ENSG00000167083;ENSG00000188338;ENSG00000102287;ENSG00000168243;ENSG00000111181	K05000+K04549+K13576+K05185+K04541+K05045
Organismal Systems	Nervous system	Serotonergic synapse	5	116	0.458246	1	ko04726	ENSG00000157542;ENSG00000148680;ENSG00000167083;ENSG00000105499;ENSG00000168243	K05000+K04163+K04549+K16342+K04541
Organismal Systems	Nervous system	Cholinergic synapse	5	118	0.473189	1	ko04725	ENSG00000157542;ENSG00000053918;ENSG00000167083;ENSG00000168243;ENSG00000070808	K05000+K04926+K04549+K04541+K04515
Organismal Systems	Nervous system	Synaptic vesicle cycle	3	79	0.587309	1	ko04721	ENSG00000110719;ENSG00000136854;ENSG00000111181	K02154+K15292+K05045
Organismal Systems	Nervous system	Glutamatergic synapse	4	119	0.673379	1	ko04724	ENSG00000167083;ENSG00000105499;ENSG00000188338;ENSG00000168243	K04549+K16342+K13576+K04541
Organismal Systems	Nervous system	Long-term depression	2	62	0.692443	1	ko04730	ENSG00000105499;ENSG00000196218	K16342+K04961
Organismal Systems	Nervous system	Dopaminergic synapse	4	138	0.779953	1	ko04728	ENSG00000157542;ENSG00000167083;ENSG00000168243;ENSG00000070808	K05000+K04549+K04541+K04515
Organismal Systems	Nervous system	Retrograde endocannabinoid signaling	4	155	0.850187	1	ko04723	ENSG00000157542;ENSG00000167083;ENSG00000102287;ENSG00000168243	K05000+K04549+K05185+K04541
Organismal Systems	Nervous system	Long-term potentiation	1	69	0.93299	1	ko04720	ENSG00000070808	K04515
Organismal Systems	Nervous system	Neurotrophin signaling pathway	2	126	0.956987	1	ko04722	ENSG00000134243;ENSG00000070808	K12388+K04515
Human Diseases	Neurodegenerative disease	Spinocerebellar ataxia	3	100	0.742658	1	ko05017	ENSG00000101327;ENSG00000131398;ENSG00000196218	K15840+K04889+K04961
Human Diseases	Neurodegenerative diseases	Prion diseases	3	35	0.14852	0.962	ko05020	ENSG00000135862;ENSG00000173372;ENSG00000271503	K05635+K03986+K12499
Human Diseases	Neurodegenerative diseases	Amyotrophic lateral sclerosis (ALS)	1	58	0.896736	1	ko05014	ENSG00000028137	K05141
Human Diseases	Neurodegenerative diseases	Parkinson disease	2	155	0.983726	1	ko05012	ENSG00000064692;ENSG00000188906	K04558+K08844
Human Diseases	Neurodegenerative diseases	Alzheimer disease	6	359	0.99485	1	ko05010	ENSG00000165879;ENSG00000155011;ENSG00000123384;ENSG00000104833;ENSG00000184371;ENSG00000104290	K03069+K02165+K04550+K07375+K05453+K02329
Human Diseases	Neurodegenerative diseases	Huntington disease	2	288	0.999861	1	ko05016	ENSG00000105877;ENSG00000104833	K10408+K07375
Metabolism	Nucleotide metabolism	Pyrimidine metabolism	3	60	0.404527	1	ko00240	ENSG00000183696;ENSG00000025708;ENSG00000158825	K00757+K00758+K01489
Metabolism	Nucleotide metabolism	Purine metabolism	6	135	0.413663	1	ko00230	ENSG00000070019;ENSG00000065989;ENSG00000154678;ENSG00000186642;ENSG00000198682;ENSG00000132518	K12320+K13293+K13755+K18283+K13811+K12321
Organismal Systems	Sensory system	Phototransduction	2	28	0.290913	1	ko04744	ENSG00000185974;ENSG00000132518	K00909+K12321
Organismal Systems	Sensory system	Inflammatory mediator regulation of TRP channels	4	103	0.559614	1	ko04750	ENSG00000105499;ENSG00000111199;ENSG00000196639;ENSG00000070808	K16342+K04973+K04149+K04515
Organismal Systems	Sensory system	Taste transduction	2	81	0.822237	1	ko04742	ENSG00000154678;ENSG00000236398	K13755+K08474
Organismal Systems	Sensory system	Olfactory transduction	9	444	0.990094	1	ko04740	ENSG00000154678;ENSG00000186642;ENSG00000183023;ENSG00000136839;ENSG00000116741;ENSG00000132518;ENSG00000225781;ENSG00000179468;ENSG00000070808	K13755+K18283+K05849+K04257+K18154+K12321+K04257+K04257+K04515
Environmental Information Processing	Signal transduction	Hedgehog signaling pathway	5	51	0.044404	0.481	ko04340	ENSG00000164161;ENSG00000185920;ENSG00000128602;ENSG00000164690;ENSG00000064309	K06231+K06225+K06226+K11988+K20033
Environmental Information Processing	Signal transduction	Rap1 signaling pathway	11	226	0.247745	1	ko04015	ENSG00000160255;ENSG00000137801;ENSG00000019991;ENSG00000119630;ENSG00000148498;ENSG00000169896;ENSG00000184371;ENSG00000171051;ENSG00000005844;ENSG00000127533;ENSG00000005961	K06464+K16857+K05460+K16859+K04237+K06461+K05453+K04172+K05718+K04236+K06476
Environmental Information Processing	Signal transduction	PI3K-Akt signaling pathway	20	445	0.257869	1	ko04151	ENSG00000134460;ENSG00000137801;ENSG00000019991;ENSG00000139626;ENSG00000136869;ENSG00000119630;ENSG00000167083;ENSG00000163235;ENSG00000184371;ENSG00000135862;ENSG00000115221;ENSG00000187266;ENSG00000139219;ENSG00000110799;ENSG00000168243;ENSG00000196878;ENSG00000135424;ENSG00000118515;ENSG00000049089;ENSG00000005961	K05068+K16857+K05460+K06590+K10160+K16859+K04549+K08774+K05453+K05635+K06589+K05079+K19719+K03900+K04541+K06244+K06583+K13302+K08131+K06476
Environmental Information Processing	Signal transduction	TNF signaling pathway	6	114	0.270659	1	ko04668	ENSG00000172216;ENSG00000028137;ENSG00000124875;ENSG00000184371;ENSG00000169245;ENSG00000271503	K10048+K05141+K05506+K05453+K12671+K12499
Environmental Information Processing	Signal transduction	Hippo signaling pathway - multiple species	2	29	0.305234	1	ko04392	ENSG00000107551;ENSG00000129474	K09851+K16682
Environmental Information Processing	Signal transduction	Wnt signaling pathway	7	167	0.457709	1	ko04310	ENSG00000205213;ENSG00000165879;ENSG00000137673;ENSG00000155011;ENSG00000162738;ENSG00000104290;ENSG00000070808	K04309+K03069+K01397+K02165+K04510+K02329+K04515
Environmental Information Processing	Signal transduction	TGF-beta signaling pathway	4	96	0.50369	1	ko04350	ENSG00000125378;ENSG00000137801;ENSG00000134363;ENSG00000135409	K04662+K16857+K04661+K04672
Environmental Information Processing	Signal transduction	Jak-STAT signaling pathway	6	171	0.643681	1	ko04630	ENSG00000134460;ENSG00000174697;ENSG00000164485;ENSG00000096996;ENSG00000187266;ENSG00000136634	K05068+K05424+K05139+K05063+K05079+K05443
Environmental Information Processing	Signal transduction	HIF-1 signaling pathway	4	121	0.686076	1	ko04066	ENSG00000100292;ENSG00000136869;ENSG00000160883;ENSG00000070808	K00510+K10160+K00844+K04515
Environmental Information Processing	Signal transduction	Calcium signaling pathway	9	273	0.723988	1	ko04020	ENSG00000169403;ENSG00000154678;ENSG00000148680;ENSG00000122420;ENSG00000183023;ENSG00000196218;ENSG00000196639;ENSG00000070808;ENSG00000198049	K04279+K13755+K04163+K04262+K05849+K04961+K04149+K04515+K04227
Environmental Information Processing	Signal transduction	MAPK signaling pathway	10	304	0.733401	1	ko04010	ENSG00000019991;ENSG00000139318;ENSG00000119630;ENSG00000105499;ENSG00000163235;ENSG00000151062;ENSG00000184371;ENSG00000170458;ENSG00000130433;ENSG00000173110	K05460+K21946+K16859+K16342+K08774+K04861+K05453+K04391+K04871+K03283
Environmental Information Processing	Signal transduction	Hippo signaling pathway	5	159	0.733788	1	ko04390	ENSG00000160255;ENSG00000125378;ENSG00000129474;ENSG00000148498;ENSG00000104290	K06464+K04662+K16682+K04237+K02329
Environmental Information Processing	Signal transduction	Ras signaling pathway	8	250	0.747047	1	ko04014	ENSG00000019991;ENSG00000119630;ENSG00000148680;ENSG00000167083;ENSG00000105499;ENSG00000163235;ENSG00000184371;ENSG00000168243	K05460+K16859+K04163+K04549+K16342+K08774+K05453+K04541
Environmental Information Processing	Signal transduction	Apelin signaling pathway	4	141	0.793979	1	ko04371	ENSG00000167083;ENSG00000183023;ENSG00000196218;ENSG00000168243	K04549+K05849+K04961+K04541
Environmental Information Processing	Signal transduction	ErbB signaling pathway	2	88	0.856081	1	ko04012	ENSG00000163235;ENSG00000070808	K08774+K04515
Environmental Information Processing	Signal transduction	cAMP signaling pathway	6	223	0.861343	1	ko04024	ENSG00000065989;ENSG00000180616;ENSG00000164161;ENSG00000121853;ENSG00000185920;ENSG00000070808	K13293+K04218+K06231+K04284+K06225+K04515
Environmental Information Processing	Signal transduction	Sphingolipid signaling pathway	3	125	0.862903	1	ko04071	ENSG00000117984;ENSG00000164023;ENSG00000158869	K01379+K04714+K07983
Environmental Information Processing	Signal transduction	AMPK signaling pathway	3	126	0.866479	1	ko04152	ENSG00000135218;ENSG00000174697;ENSG00000165140	K06259+K05424+K03841
Environmental Information Processing	Signal transduction	Notch signaling pathway	1	59	0.900715	1	ko04330	ENSG00000090932	K06051
Environmental Information Processing	Signal transduction	VEGF signaling pathway	1	63	0.915158	1	ko04370	ENSG00000105499	K16342
Environmental Information Processing	Signal transduction	Phospholipase D signaling pathway	5	229	0.942382	1	ko04072	ENSG00000105499;ENSG00000122420;ENSG00000180871;ENSG00000158869;ENSG00000198049	K16342+K04262+K05050+K07983+K04227
Environmental Information Processing	Signal transduction	cGMP - PKG signaling pathway	3	175	0.966547	1	ko04022	ENSG00000186642;ENSG00000183023;ENSG00000116741	K18283+K05849+K18154
Environmental Information Processing	Signal transduction	NF-kappa B signaling pathway	3	178	0.969412	1	ko04064	ENSG00000136869;ENSG00000140379;ENSG00000170458	K10160+K02162+K04391
Environmental Information Processing	Signal transduction	FoxO signaling pathway	2	139	0.972057	1	ko04068	ENSG00000118515;ENSG00000136634	K13302+K05443
Environmental Information Processing	Signal transduction	Phosphatidylinositol signaling system	1	102	0.981753	1	ko04070	ENSG00000155252	K13711
Environmental Information Processing	Signal transduction	mTOR signaling pathway	2	163	0.987624	1	ko04150	ENSG00000104290;ENSG00000118515	K02329+K13302
Environmental Information Processing	Signaling molecules and interaction	Cytokine-cytokine receptor interaction	30	302	1.37e-06	0.000186	ko04060	ENSG00000134460;ENSG00000125378;ENSG00000274736;ENSG00000028137;ENSG00000102962;ENSG00000163736;ENSG00000174697;ENSG00000124875;ENSG00000163737;ENSG00000180871;ENSG00000204671;ENSG00000096996;ENSG00000184371;ENSG00000168329;ENSG00000187266;ENSG00000010610;ENSG00000239697;ENSG00000248871;ENSG00000139567;ENSG00000135409;ENSG00000169245;ENSG00000169248;ENSG00000164509;ENSG00000161921;ENSG00000120949…	K05068+K04662+K05511+K05141+K21095+K10029+K05424+K05506+K05407+K05050+K22631+K05063+K05453+K04192+K05079+K06454+K05474+K05475+K13594+K04672+K12671+K12672+K22630+K10035+K05145+K04176+K05443+K12499+K05481+K05479
Environmental Information Processing	Signaling molecules and interaction	Viral protein interaction with cytokine and cytokine receptor	15	101	5.96e-06	0.000539	ko04061	ENSG00000134460;ENSG00000274736;ENSG00000028137;ENSG00000102962;ENSG00000163736;ENSG00000124875;ENSG00000163737;ENSG00000180871;ENSG00000184371;ENSG00000168329;ENSG00000169245;ENSG00000169248;ENSG00000163823;ENSG00000136634;ENSG00000271503	K05068+K05511+K05141+K21095+K10029+K05506+K05407+K05050+K05453+K04192+K12671+K12672+K04176+K05443+K12499
Environmental Information Processing	Signaling molecules and interaction	ECM-receptor interaction	14	91	8.03e-06	0.000544	ko04512	ENSG00000124145;ENSG00000137801;ENSG00000139626;ENSG00000135218;ENSG00000135862;ENSG00000115221;ENSG00000139219;ENSG00000185518;ENSG00000110799;ENSG00000196878;ENSG00000135424;ENSG00000169704;ENSG00000049089;ENSG00000005961	K16338+K16857+K06590+K06259+K05635+K06589+K19719+K06258+K03900+K06244+K06583+K06263+K08131+K06476
Environmental Information Processing	Signaling molecules and interaction	Cell adhesion molecules (CAMs)	16	153	0.000238	0.00805	ko04514	ENSG00000170558;ENSG00000160255;ENSG00000253958;ENSG00000124145;ENSG00000038427;ENSG00000139626;ENSG00000088827;ENSG00000114013;ENSG00000172260;ENSG00000185758;ENSG00000169896;ENSG00000107738;ENSG00000010610;ENSG00000005844;ENSG00000162706;ENSG00000113946	K06736+K06464+K06087+K16338+K06793+K06590+K06548+K05413+K06775+K06087+K06461+K23268+K06454+K05718+K06780+K06087
Environmental Information Processing	Signaling molecules and interaction	Neuroactive ligand-receptor interaction	23	352	0.008352	0.126	ko04080	ENSG00000101327;ENSG00000100300;ENSG00000171860;ENSG00000169403;ENSG00000174697;ENSG00000148498;ENSG00000148680;ENSG00000122420;ENSG00000197405;ENSG00000180616;ENSG00000125730;ENSG00000121853;ENSG00000102287;ENSG00000171049;ENSG00000171051;ENSG00000130368;ENSG00000070031;ENSG00000110680;ENSG00000196639;ENSG00000127533;ENSG00000178623;ENSG00000181631;ENSG00000198049	K15840+K05770+K04009+K04279+K05424+K04237+K04163+K04262+K04010+K04218+K03990+K04284+K05185+K04173+K04172+K04303+K05263+K12332+K04149+K04236+K04276+K08388+K04227
Human Diseases	Substance dependence	Morphine addiction	7	96	0.074329	0.682	ko05032	ENSG00000157542;ENSG00000065989;ENSG00000154678;ENSG00000186642;ENSG00000167083;ENSG00000102287;ENSG00000168243	K05000+K13293+K13755+K18283+K04549+K05185+K04541
Human Diseases	Substance dependence	Amphetamine addiction	2	70	0.754616	1	ko05031	ENSG00000101327;ENSG00000070808	K15840+K04515
Human Diseases	Substance dependence	Nicotine addiction	1	41	0.79877	1	ko05033	ENSG00000102287	K05185
Human Diseases	Substance dependence	Cocaine addiction	1	49	0.852966	1	ko05030	ENSG00000101327	K15840
Human Diseases	Substance dependence	Alcoholism	4	195	0.944714	1	ko05034	ENSG00000101327;ENSG00000167083;ENSG00000099284;ENSG00000168243	K15840+K04549+K11251+K04541
Genetic Information Processing	Transcription	Spliceosome	1	143	0.996402	1	ko03040	ENSG00000173110	K03283
Genetic Information Processing	Translation	mRNA surveillance pathway	1	99	0.979458	1	ko03015	ENSG00000205022	K14396
Cellular Processes	Transport and catabolism	Phagosome	22	230	6.56e-05	0.00355	ko04145	ENSG00000260314;ENSG00000160255;ENSG00000172243;ENSG00000038945;ENSG00000137801;ENSG00000110719;ENSG00000135218;ENSG00000136869;ENSG00000104833;ENSG00000125730;ENSG00000169896;ENSG00000135047;ENSG00000005381;ENSG00000170458;ENSG00000090659;ENSG00000158517;ENSG00000116701;ENSG00000162747;ENSG00000011028;ENSG00000203747;ENSG00000163131;ENSG00000019169	K06560+K06464+K10074+K06558+K16857+K02154+K06259+K10160+K07375+K03990+K06461+K01365+K10789+K04391+K06563+K08011+K08010+K06463+K06560+K06463+K01368+K13884
Cellular Processes	Transport and catabolism	Lysosome	12	139	0.006873	0.11	ko04142	ENSG00000110719;ENSG00000134243;ENSG00000135047;ENSG00000181523;ENSG00000136943;ENSG00000197746;ENSG00000107798;ENSG00000129226;ENSG00000117984;ENSG00000174080;ENSG00000018280;ENSG00000163131	K02154+K12388+K01365+K01565+K01375+K12382+K01052+K06501+K01379+K01373+K12347+K01368
Cellular Processes	Transport and catabolism	Endocytosis	11	256	0.390188	1	ko04144	ENSG00000168461;ENSG00000134460;ENSG00000185974;ENSG00000049283;ENSG00000103966;ENSG00000148498;ENSG00000135631;ENSG00000130164;ENSG00000180871;ENSG00000165457;ENSG00000173110	K07891+K05068+K00909+K12471+K12477+K04237+K12484+K12473+K05050+K13649+K03283
Cellular Processes	Transport and catabolism	Autophagy - animal	3	149	0.928867	1	ko04140	ENSG00000078804;ENSG00000135047;ENSG00000117984	K21247+K01365+K01379
Cellular Processes	Transport and catabolism	Peroxisome	1	86	0.965692	1	ko04146	ENSG00000261130	K13349
Metabolism	Xenobiotics biodegradation and metabolism	Drug metabolism - other enzymes	6	80	0.085181	0.745	ko00983	ENSG00000183696;ENSG00000025708;ENSG00000198848;ENSG00000160868;ENSG00000005381;ENSG00000158825	K00757+K00758+K01044+K17689+K10789+K01489
Metabolism	Xenobiotics biodegradation and metabolism	Metabolism of xenobiotics by cytochrome P450	3	75	0.551773	1	ko00980	ENSG00000159228;ENSG00000138061;ENSG00000160868	K00079+K07410+K17689
Metabolism	Xenobiotics biodegradation and metabolism	Drug metabolism - cytochrome P450	1	70	0.935575	1	ko00982	ENSG00000160868	K17689
